# Supplementary material for: Identification of the CRE-1 Cellulolytic Regulon in Neurospora crassa
Source: PLoS One. 2011 Sep 29;6(9):e25654. doi: 10.1371/journal.pone.0025654 (PMC3183063; doi:10.1371/journal.pone.0025654)
Supplement: Table S2 — (XLS) [file pone.0025654.s006.xls]

## Sheet: total_6614
Table S2: Microarray Data
Page 1: Relative expression level of all genes detected in WT and Dcre-1 strains grown on Avicel versus minimal media
Unique ID	Common Name	WT_Avi4h	WT_MM4h	CRE1_Avi4h	CRE1_MM4h	(-)97.5%[ WT_Av4h ]	(-)97.5%[WT_MM4h]	(-)97.5%[CRE1_Av4h]	(-)97.5%[CRE1_MM4h]	(+)97.5%[ WT_Av4h ]	(+)97.5%[WT_MM4h]	(+)97.5%[CRE1_Av4h]	(+)97.5%[CRE1_MM4h]	Coefficient of Variation[ WT_Av4h ]	Coefficient of Variation[WT_MM4h]	Coefficient of Variation[CRE1_Av4h]	Coefficient of Variation[CRE1_MM4h]	Coefficient of Variation(-)97.5%[ WT_Av4h ]	Coefficient of Variation(-)97.5%[WT_MM4h]	Coefficient of Variation(-)97.5%[CRE1_Av4h]	Coefficient of Variation(-)97.5%[CRE1_MM4h]	Coefficient of Variation(+)97.5%[ WT_Av4h ]	Coefficient of Variation(+)97.5%[WT_MM4h]	Coefficient of Variation(+)97.5%[CRE1_Av4h]	Coefficient of Variation(+)97.5%[CRE1_MM4h]	P( WT_Av4h >WT_MM4h)	P( WT_Av4h >CRE1_Av4h)	P( WT_Av4h >CRE1_MM4h)	P(WT_MM4h> WT_Av4h )	P(WT_MM4h>CRE1_Av4h)	P(WT_MM4h>CRE1_MM4h)	P(CRE1_Av4h> WT_Av4h )	P(CRE1_Av4h>WT_MM4h)	P(CRE1_Av4h>CRE1_MM4h)	P(CRE1_MM4h> WT_Av4h )	P(CRE1_MM4h>WT_MM4h)	P(CRE1_MM4h>CRE1_Av4h)	Mu Acceptance Ratio	Coefficient of Variation Acceptance Ratio	Acceptable?	Ln Density of Likelihood
100h1_020_1161	NCU06659.2	1.02558	1	1.0213	1.03414	0.15648	0.15378	0.1862	0.18286	0.16416	0.16875	0.19841	0.19049	0.10321	0.10321	0.10321	0.10321	0.05185	0.05185	0.05185	0.05185	0.20804	0.20804	0.20804	0.20804	0.6127	0.5146	0.471	0.3873	0.4205	0.3523	0.4854	0.5795	0.4586	0.529	0.6477	0.5414	0.3	0.19	TRUE	7.75399
100h1_080_356	NCU06664.2	1.34291	1	1.03109	1.10256	0.38224	0.29943	0.33735	0.37668	0.4018	0.32328	0.44811	0.39267	0.14513	0.14513	0.14513	0.14513	0.09197	0.09197	0.09197	0.09197	0.47206	0.47206	0.47206	0.47206	0.9492	0.8981	0.8351	0.0508	0.4228	0.2764	0.1019	0.5772	0.3367	0.1649	0.7236	0.6633	0.43	0.33	TRUE	6.17263
100h1_190_1601	NCU06672.2	1.50757	1	1.26001	1.63674	0.76129	0.48448	0.57953	0.75719	0.94139	0.84557	0.71101	0.86032	0.32411	0.32411	0.32411	0.32411	0.17928	0.17928	0.17928	0.17928	0.67444	0.67444	0.67444	0.67444	0.85	0.6999	0.4103	0.15	0.2919	0.109	0.3001	0.7081	0.1946	0.5897	0.891	0.8054	0.17	0.47	TRUE	1.87173
103e1_080_549	NCU07154.2	1.15468	1	1.16021	1.04701	0.26387	0.24056	0.27292	0.2546	0.29227	0.27351	0.30279	0.29011	0.18959	0.18959	0.18959	0.18959	0.07973	0.07973	0.07973	0.07973	0.2478	0.2478	0.2478	0.2478	0.8094	0.4794	0.6986	0.1906	0.2194	0.3913	0.5206	0.7806	0.7303	0.3014	0.6087	0.2697	0.32	0.25	TRUE	3.4418
103e1_120_1549	NCU07158.2	1.67155	1	1.04282	1.05522	0.24471	0.17567	0.18128	0.2138	0.21423	0.2039	0.18892	0.25453	0.09139	0.09139	0.09139	0.09139	0.05017	0.05017	0.05017	0.05017	0.24672	0.24672	0.24672	0.24672	0.9958	0.9946	0.9879	0.0042	0.3455	0.3006	0.0054	0.6545	0.4434	0.0121	0.6994	0.5566	0.21	0.16	TRUE	8.07744
103e1_180_462	NCU07166.2	1.34752	1	1.11485	1.08506	0.55691	0.42149	0.44453	0.43363	0.62088	0.6031	0.49453	0.49492	0.23827	0.23827	0.23827	0.23827	0.14123	0.14123	0.14123	0.14123	0.58722	0.58722	0.58722	0.58722	0.8478	0.7584	0.767	0.1522	0.348	0.3801	0.2416	0.652	0.5575	0.233	0.6199	0.4425	0.44	0.37	TRUE	3.27615
104h10_030_662	NCU07768.2	1.03833	1	1.06088	1.06951	0.11829	0.11032	0.12103	0.11562	0.12596	0.1178	0.11836	0.1219	0.08146	0.08146	0.08146	0.08146	0.03715	0.03715	0.03715	0.03715	0.124	0.124	0.124	0.124	0.7088	0.3887	0.3606	0.2912	0.2442	0.1723	0.6113	0.7558	0.4506	0.6394	0.8277	0.5494	0.16	0.18	TRUE	9.81868
104h10_045_150	NCU07770.2	1.10711	1	1.04946	1.07232	0.16411	0.16042	0.15535	0.16402	0.17726	0.1628	0.16669	0.17907	0.11396	0.11396	0.11396	0.11396	0.04984	0.04984	0.04984	0.04984	0.16826	0.16826	0.16826	0.16826	0.847	0.7041	0.6101	0.153	0.3338	0.2454	0.2959	0.6662	0.4137	0.3899	0.7546	0.5863	0.22	0.16	TRUE	7.12955
104h10_080_861	NCU07774.2	1.08056	1	1.04518	1.04958	0.17194	0.15591	0.16153	0.16414	0.17072	0.17206	0.18074	0.18318	0.11826	0.11826	0.11826	0.11826	0.05251	0.05251	0.05251	0.05251	0.18333	0.18333	0.18333	0.18333	0.7845	0.6303	0.603	0.2155	0.3465	0.3202	0.3697	0.6535	0.4815	0.397	0.6798	0.5185	0.22	0.17	TRUE	6.77688
104h10_135_443	NCU07781.2	1.20568	1	1.36919	1.15354	0.32632	0.27936	0.39006	0.31918	0.38108	0.35836	0.40455	0.40612	0.23759	0.23759	0.23759	0.23759	0.10075	0.10075	0.10075	0.10075	0.28119	0.28119	0.28119	0.28119	0.8251	0.2748	0.5772	0.1749	0.1143	0.2463	0.7252	0.8857	0.7758	0.4228	0.7537	0.2242	0.38	0.3	TRUE	1.52739
104h10_160_1337	NCU07784.2	1.3829	1	1.27675	1.36615	0.51788	0.27207	0.48246	0.37884	0.63086	0.32398	0.56553	0.37892	0.17638	0.17638	0.17638	0.17638	0.09373	0.09373	0.09373	0.09373	0.36124	0.36124	0.36124	0.36124	0.9331	0.611	0.5195	0.0669	0.1708	0.0641	0.389	0.8292	0.3398	0.4805	0.9359	0.6602	0.34	0.28	TRUE	4.36484
104h10_180_308	NCU07786.2	1.32816	1	1.05042	1.43666	0.48678	0.37768	0.49082	0.78596	0.5323	0.45137	0.67344	0.95198	0.22994	0.22994	0.22994	0.22994	0.13584	0.13584	0.13584	0.13584	0.52792	0.52792	0.52792	0.52792	0.8777	0.854	0.4187	0.1223	0.4431	0.1458	0.146	0.5569	0.2423	0.5813	0.8542	0.7577	0.43	0.36	TRUE	2.61715
104h10_220_2089	NCU07788.2	2.02195	1	3.10143	2.63529	0.59692	0.30499	0.79437	0.75025	0.709	0.44591	0.82717	0.8197	0.23336	0.23336	0.23336	0.23336	0.09982	0.09982	0.09982	0.09982	0.28119	0.28119	0.28119	0.28119	0.9955	0.0338	0.1479	0.0045	0.0011	0.0019	0.9662	0.9989	0.7795	0.8521	0.9981	0.2205	0.34	0.3	TRUE	1.26261
104h10_230_160	NCU07789.2	1.11114	1	1.26853	1.09112	0.28417	0.25934	0.30338	0.28433	0.31004	0.31647	0.33533	0.33121	0.21074	0.21074	0.21074	0.21074	0.09256	0.09256	0.09256	0.09256	0.27006	0.27006	0.27006	0.27006	0.7149	0.2315	0.5325	0.2851	0.1353	0.3194	0.7685	0.8647	0.7842	0.4675	0.6806	0.2158	0.35	0.27	TRUE	2.70916
123a4_050_3149	NCU01172.2	1.39394	1	1.21003	1.22053	0.40628	0.3169	0.38473	0.40111	0.465	0.41437	0.46459	0.50355	0.27827	0.27827	0.27827	0.27827	0.11894	0.11894	0.11894	0.11894	0.31471	0.31471	0.31471	0.31471	0.9074	0.7392	0.6897	0.0926	0.2575	0.2109	0.2608	0.7425	0.4889	0.3103	0.7891	0.5111	0.42	0.34	TRUE	0.126737
123a4_190_2105	NCU01161.2	1.29364	1	1.30776	1.05913	0.39985	0.32859	0.42236	0.36184	0.45344	0.41135	0.49889	0.45926	0.28581	0.28581	0.28581	0.28581	0.11933	0.11933	0.11933	0.11933	0.3148	0.3148	0.3148	0.3148	0.8478	0.4819	0.7538	0.1522	0.1785	0.4144	0.5181	0.8215	0.7789	0.2462	0.5856	0.2211	0.43	0.36	TRUE	0.267463
123a4_260_271	NCU01153.2	1.0841	1	1.10852	1.78009	0.31903	0.28133	0.36792	0.49252	0.4177	0.31831	0.48351	0.45087	0.18473	0.18473	0.18473	0.18473	0.0985	0.0985	0.0985	0.0985	0.36926	0.36926	0.36926	0.36926	0.6946	0.4524	0.0372	0.3054	0.3086	0.0112	0.5476	0.6914	0.044	0.9628	0.9888	0.956	0.35	0.3	TRUE	4.03303
123a4_270_3416	NCU01151.2	1.27912	1	1.20315	1.22561	0.53395	0.55779	0.48457	0.65919	0.57555	0.86315	0.5948	0.91678	0.34848	0.34848	0.34848	0.34848	0.16561	0.16561	0.16561	0.16561	0.50531	0.50531	0.50531	0.50531	0.7783	0.5788	0.5422	0.2217	0.3268	0.3597	0.4212	0.6732	0.4989	0.4578	0.6403	0.5011	0.17	0.46	TRUE	-0.11258
123a4_290_211	NCU01149.2	1.46035	1	1.06923	1.08662	0.35567	0.22636	0.27931	0.26143	0.36847	0.2587	0.31839	0.28506	0.16911	0.16911	0.16911	0.16911	0.08182	0.08182	0.08182	0.08182	0.27806	0.27806	0.27806	0.27806	0.9757	0.9316	0.9241	0.0243	0.3564	0.2982	0.0684	0.6436	0.4583	0.0759	0.7018	0.5417	0.3	0.25	TRUE	3.15399
123a4_300_697	NCU01148.2	1.03933	1	1.10724	1.0073	0.13046	0.11707	0.13106	0.12554	0.13087	0.1313	0.13432	0.12518	0.08836	0.08836	0.08836	0.08836	0.04006	0.04006	0.04006	0.04006	0.13132	0.13132	0.13132	0.13132	0.6914	0.2081	0.6373	0.3086	0.1323	0.4615	0.7919	0.8677	0.8752	0.3627	0.5385	0.1248	0.17	0.45	TRUE	8.4471
123a4_340_930	NCU01144.2	1.084	1	1.00961	1.04907	0.21325	0.20947	0.20821	0.20476	0.23101	0.22583	0.22331	0.23935	0.15935	0.15935	0.15935	0.15935	0.06922	0.06922	0.06922	0.06922	0.21021	0.21021	0.21021	0.21021	0.7234	0.7057	0.5861	0.2766	0.4694	0.3562	0.2943	0.5306	0.3862	0.4139	0.6438	0.6138	0.28	0.23	TRUE	4.74639
12f11_020_1644	NCU01321.2	1.18837	1	1.23353	1.05263	0.09456	0.08266	0.09786	0.08697	0.09695	0.08673	0.10023	0.09019	0.06001	0.06001	0.06001	0.06001	0.027	0.027	0.027	0.027	0.08893	0.08893	0.08893	0.08893	0.9918	0.2375	0.9571	0.0082	0.0071	0.172	0.7625	0.9929	0.9865	0.0429	0.828	0.0135	0.34	0.2	TRUE	12.0069
12f11_100_1124	NCU01329.2	1.08207	1	1.09623	1.00064	0.17447	0.15965	0.17744	0.15948	0.18756	0.18419	0.18559	0.18732	0.12281	0.12281	0.12281	0.12281	0.05418	0.05418	0.05418	0.05418	0.18273	0.18273	0.18273	0.18273	0.7661	0.4467	0.74	0.2339	0.2291	0.4983	0.5533	0.7709	0.7999	0.26	0.5017	0.2001	0.23	0.19	TRUE	6.68241
12f11_150_336	NCU01334.2	1.27634	1	1.30035	1.18862	0.29775	0.25731	0.30572	0.28691	0.35235	0.29948	0.33685	0.33233	0.1975	0.1975	0.1975	0.1975	0.08619	0.08619	0.08619	0.08619	0.2549	0.2549	0.2549	0.2549	0.9041	0.4625	0.6474	0.0959	0.1098	0.1607	0.5375	0.8902	0.6982	0.3526	0.8393	0.3018	0.33	0.28	TRUE	2.0757
12f11_170_820	NCU01336.2	1.82647	1	1.54315	1.24404	0.506	0.34572	0.32465	0.28551	0.41919	0.53505	0.25318	0.3012	0.07702	0.07702	0.07702	0.07702	0.05092	0.05092	0.05092	0.05092	0.39054	0.39054	0.39054	0.39054	0.9677	0.9247	0.9609	0.0323	0.0436	0.0808	0.0753	0.9564	0.9443	0.0391	0.9192	0.0557	0.22	0.19	TRUE	9.72606
12f11_190_573	NCU01338.2	1.13899	1	1.17249	1.01528	0.29055	0.26478	0.29536	0.26689	0.30571	0.31564	0.3173	0.33104	0.21474	0.21474	0.21474	0.21474	0.09145	0.09145	0.09145	0.09145	0.26238	0.26238	0.26238	0.26238	0.7527	0.4356	0.6984	0.2473	0.2368	0.4714	0.5644	0.7632	0.7716	0.3016	0.5286	0.2284	0.35	0.3	TRUE	2.49925
12f11_200_980	NCU01339.2	1.13527	1	1.24151	1.0739	0.27172	0.24371	0.28732	0.26046	0.30421	0.29121	0.31692	0.30812	0.19762	0.19762	0.19762	0.19762	0.08543	0.08543	0.08543	0.08543	0.25062	0.25062	0.25062	0.25062	0.7686	0.2937	0.6059	0.2314	0.1477	0.3437	0.7063	0.8523	0.7884	0.3941	0.6563	0.2116	0.33	0.28	TRUE	3.03546
12f11_220_139	NCU01341.2	1.20666	1	2.85566	1.00575	0.26594	0.24834	0.54156	0.25151	0.32904	0.32984	0.43908	0.33273	0.18214	0.18214	0.18214	0.18214	0.08008	0.08008	0.08008	0.08008	0.23665	0.23665	0.23665	0.23665	0.8755	0.0006	0.8249	0.1245	0	0.4814	0.9994	1	0.9997	0.1751	0.5186	0.0003	0.26	0.27	TRUE	3.39658
13e11_040_2357	NCU01140.2	5.14239	1	3.06296	2.38598	0.81146	0.21979	0.5322	0.51087	0.67472	0.29706	0.53313	0.63764	0.12582	0.12582	0.12582	0.12582	0.05947	0.05947	0.05947	0.05947	0.22355	0.22355	0.22355	0.22355	1	0.9961	0.9971	0	0.0004	0.0011	0.0039	0.9996	0.9561	0.0029	0.9989	0.0439	0.2	0.21	TRUE	5.06198
13e11_310_1291	NCU01118.2	1.23798	1	1.19214	1.26097	0.42549	0.29974	0.36394	0.35412	0.49461	0.39043	0.39868	0.37379	0.19477	0.19477	0.19477	0.19477	0.10256	0.10256	0.10256	0.10256	0.37734	0.37734	0.37734	0.37734	0.818	0.5701	0.4677	0.182	0.2253	0.1191	0.4299	0.7747	0.3743	0.5323	0.8809	0.6257	0.37	0.32	TRUE	3.47606
13e11_350_476	NCU01114.2	1.18436	1	1.1625	1.06316	0.27111	0.23116	0.27688	0.2621	0.29361	0.27387	0.29306	0.3161	0.19536	0.19536	0.19536	0.19536	0.08476	0.08476	0.08476	0.08476	0.22198	0.22198	0.22198	0.22198	0.8431	0.548	0.7052	0.1569	0.2228	0.3493	0.452	0.7772	0.6826	0.2948	0.6507	0.3174	0.33	0.28	TRUE	3.09451
13e11_360_1304	NCU01113.2	1.12363	1	1.03705	1.02822	0.20631	0.19257	0.19929	0.20205	0.22831	0.21246	0.22548	0.22098	0.15228	0.15228	0.15228	0.15228	0.06658	0.06658	0.06658	0.06658	0.21219	0.21219	0.21219	0.21219	0.8085	0.7358	0.7204	0.1915	0.4031	0.4186	0.2642	0.5969	0.5249	0.2796	0.5814	0.4751	0.27	0.23	TRUE	4.82121
15e11_110_1125	NCU01380.2	1.50202	1	1.35022	1.03681	0.20411	0.15141	0.19239	0.15152	0.21005	0.16696	0.19786	0.17487	0.10826	0.10826	0.10826	0.10826	0.04739	0.04739	0.04739	0.04739	0.16594	0.16594	0.16594	0.16594	0.995	0.8593	0.9908	0.005	0.0178	0.3436	0.1407	0.9822	0.9834	0.0092	0.6564	0.0166	0.2	0.17	TRUE	6.76055
15e11_120_11225	NCU01379.2	1.31644	1	1.14157	1.03912	0.27354	0.23749	0.2549	0.24235	0.30528	0.26842	0.2955	0.26737	0.1838	0.1838	0.1838	0.1838	0.0795	0.0795	0.0795	0.0795	0.23465	0.23465	0.23465	0.23465	0.9385	0.8136	0.8867	0.0615	0.2366	0.4029	0.1864	0.7634	0.7268	0.1133	0.5971	0.2732	0.31	0.27	TRUE	1.23319
15e11_130_1991	NCU01378.2	1.10726	1	1.03041	1.08836	0.23226	0.21943	0.22769	0.23862	0.25189	0.2588	0.26561	0.26864	0.17904	0.17904	0.17904	0.17904	0.07915	0.07915	0.07915	0.07915	0.23486	0.23486	0.23486	0.23486	0.7473	0.6848	0.541	0.2527	0.4261	0.2952	0.3152	0.5739	0.3635	0.459	0.7048	0.6365	0.3	0.26	TRUE	3.77625
15e11_160_835	NCU01374.2	1.20463	1	1.36155	1.39533	0.52257	0.44522	0.58078	0.67508	0.6227	0.6162	0.79186	0.86654	0.34992	0.34992	0.34992	0.34992	0.1701	0.1701	0.1701	0.1701	0.50142	0.50142	0.50142	0.50142	0.7381	0.3525	0.3544	0.2619	0.2255	0.1933	0.6475	0.7745	0.4646	0.6456	0.8067	0.5354	0.38	0.48	TRUE	-0.700227
15e6_030_1569	NCU01370.2	1.12391	1	1.10362	1.12628	0.26403	0.25171	0.27028	0.27992	0.31577	0.2968	0.30397	0.31293	0.1997	0.1997	0.1997	0.1997	0.08729	0.08729	0.08729	0.08729	0.2596	0.2596	0.2596	0.2596	0.7543	0.5458	0.4936	0.2457	0.3095	0.2547	0.4542	0.6905	0.4536	0.5064	0.7453	0.5464	0.33	0.29	TRUE	2.95402
15e6_140_247	NCU01360.2	1.01102	1	1.06543	1.11736	0.22684	0.22872	0.2369	0.25374	0.24952	0.25569	0.25018	0.28716	0.18156	0.18156	0.18156	0.18156	0.07941	0.07941	0.07941	0.07941	0.23369	0.23369	0.23369	0.23369	0.5322	0.365	0.2882	0.4678	0.3613	0.2398	0.635	0.6387	0.3818	0.7118	0.7602	0.6182	0.31	0.27	TRUE	3.57301
15e6_180_81	NCU01357.2	1.14882	1	1.44255	1.07286	0.20108	0.18494	0.27743	0.22723	0.21241	0.21142	0.2915	0.23967	0.12474	0.12474	0.12474	0.12474	0.05936	0.05936	0.05936	0.05936	0.23772	0.23772	0.23772	0.23772	0.8736	0.0475	0.695	0.1264	0.0254	0.2726	0.9525	0.9746	0.9614	0.305	0.7274	0.0386	0.25	0.21	TRUE	6.15214
17e5_010_969	NCU03742.2	1.27685	1	1.55332	1.10074	0.21302	0.17392	0.23723	0.19023	0.22144	0.19397	0.2477	0.20587	0.12473	0.12473	0.12473	0.12473	0.05547	0.05547	0.05547	0.05547	0.18311	0.18311	0.18311	0.18311	0.9674	0.0548	0.8671	0.0326	0.0066	0.1981	0.9452	0.9934	0.9895	0.1329	0.8019	0.0105	0.23	0.2	TRUE	6.39483
17e5_140_1020	NCU03730.2	1.11248	1	1.13898	1.00713	0.30998	0.24685	0.29864	0.24216	0.31599	0.27086	0.36307	0.28009	0.18009	0.18009	0.18009	0.18009	0.08636	0.08636	0.08636	0.08636	0.29505	0.29505	0.29505	0.29505	0.7423	0.4547	0.6964	0.2577	0.256	0.4887	0.5453	0.744	0.7714	0.3036	0.5113	0.2286	0.33	0.29	TRUE	3.66458
17e5_170_1852	NCU03725.2	2.70993	1	1.63715	1.31379	0.31915	0.15028	0.21307	0.19714	0.30089	0.16525	0.23724	0.23739	0.10373	0.10373	0.10373	0.10373	0.04612	0.04612	0.04612	0.04612	0.15116	0.15116	0.15116	0.15116	0.9999	0.999	0.9996	0.0001	0.0016	0.0093	0.001	0.9984	0.9753	0.0004	0.9907	0.0247	0.18	0.17	TRUE	7.28581
17e5_190_113	NCU03721.2	1.20103	1	1.13529	1.00723	0.48417	0.41607	0.64958	0.50473	0.51564	0.4509	0.97472	0.72057	0.26139	0.26139	0.26139	0.26139	0.14986	0.14986	0.14986	0.14986	0.57505	0.57505	0.57505	0.57505	0.7692	0.5783	0.7021	0.2308	0.3833	0.4862	0.4217	0.6167	0.6007	0.2979	0.5138	0.3993	0.47	0.44	TRUE	2.45163
17e5_220_694	NCU03718.2	1.07209	1	1.05542	1.24692	0.29284	0.26848	0.35529	0.53484	0.30352	0.30383	0.45704	0.55767	0.11861	0.11861	0.11861	0.11861	0.07486	0.07486	0.07486	0.07486	0.45229	0.45229	0.45229	0.45229	0.7284	0.5627	0.2274	0.2716	0.3647	0.1349	0.4373	0.6353	0.2373	0.7726	0.8651	0.7627	0.3	0.26	TRUE	6.06931
17e5_290_1370	NCU03712.2	1.12673	1	1.16642	1.02826	0.18466	0.17256	0.18634	0.17097	0.18588	0.18363	0.2058	0.19399	0.12705	0.12705	0.12705	0.12705	0.05606	0.05606	0.05606	0.05606	0.17	0.17	0.17	0.17	0.8471	0.377	0.7628	0.1529	0.1284	0.3985	0.623	0.8716	0.8595	0.2372	0.6015	0.1405	0.24	0.2	TRUE	6.41101
18a7_030_202	NCU06643.2	1.21181	1	1.33024	1.13071	0.26792	0.21033	0.29494	0.22682	0.31	0.2333	0.32233	0.2379	0.14258	0.14258	0.14258	0.14258	0.06958	0.06958	0.06958	0.06958	0.25453	0.25453	0.25453	0.25453	0.9087	0.2752	0.6736	0.0913	0.062	0.1751	0.7248	0.938	0.8803	0.3264	0.8249	0.1197	0.28	0.24	TRUE	5.00599
18a7_120_1071	NCU06652.2	1.801	1	1.46802	1.11039	0.25206	0.15701	0.2165	0.18118	0.24961	0.1888	0.2304	0.20741	0.11692	0.11692	0.11692	0.11692	0.05199	0.05199	0.05199	0.05199	0.16804	0.16804	0.16804	0.16804	0.9987	0.9566	0.9959	0.0013	0.0103	0.16	0.0434	0.9897	0.9818	0.0041	0.84	0.0182	0.21	0.19	TRUE	6.65312
18a7_170_2443	NCU06656.2	2.76353	1	2.26092	1.45889	0.58625	0.2472	0.47502	0.34921	0.57245	0.31988	0.50807	0.46014	0.1807	0.1807	0.1807	0.1807	0.07825	0.07825	0.07825	0.07825	0.23684	0.23684	0.23684	0.23684	0.9997	0.8888	0.9927	0.0003	0.0025	0.0265	0.1112	0.9975	0.9819	0.0073	0.9735	0.0181	0.29	0.27	TRUE	1.50489
18f11_020_1946	NCU01214.2	1.09799	1	1.09388	1.02223	0.26225	0.25294	0.27248	0.24685	0.29049	0.29182	0.29233	0.30208	0.19906	0.19906	0.19906	0.19906	0.08599	0.08599	0.08599	0.08599	0.25285	0.25285	0.25285	0.25285	0.71	0.5082	0.6434	0.29	0.3295	0.4495	0.4918	0.6705	0.6525	0.3566	0.5505	0.3475	0.34	0.29	TRUE	2.85954
18f11_060_1695	NCU01210.2	1.44455	1	1.20253	1.02926	0.25404	0.1872	0.2235	0.19791	0.25196	0.21006	0.24158	0.21189	0.14117	0.14117	0.14117	0.14117	0.06313	0.06313	0.06313	0.06313	0.19858	0.19858	0.19858	0.19858	0.9871	0.9078	0.9745	0.0129	0.1134	0.40704	0.0922	0.8866	0.8808	0.0255	0.59296	0.1192	0.25	0.22	TRUE	5.02047
18f11_210_55	NCU01196.2	2.9942	1	2.36203	1.2831	1.3785	0.48694	1.21485	0.70502	1.3344	0.90662	1.48549	1.33896	0.37971	0.37971	0.37971	0.37971	0.20731	0.20731	0.20731	0.20731	0.80491	0.80491	0.80491	0.80491	0.9884	0.7226	0.936	0.0116	0.0641	0.2707	0.2774	0.9359	0.8927	0.064	0.7293	0.1073	0.3	0.22	TRUE	-0.252335
1a9_100_1336	NCU01032.2	1.90174	1	1.25634	1.08921	0.59832	0.4426	0.40047	0.4927	0.54374	0.61016	0.48777	0.74059	0.23975	0.23975	0.23975	0.23975	0.12207	0.12207	0.12207	0.12207	0.43052	0.43052	0.43052	0.43052	0.9818	0.9362	0.9286	0.0182	0.2353	0.4145	0.0638	0.7647	0.7294	0.0714	0.5855	0.2706	0.43	0.39	TRUE	2.29037
1a9_170_147	NCU01024.2	1.00492	1	1.00321	1.12385	0.35125	0.31511	0.3641	0.34629	0.39726	0.36546	0.46378	0.40163	0.25044	0.25044	0.25044	0.25044	0.11568	0.11568	0.11568	0.11568	0.35277	0.35277	0.35277	0.35277	0.5054	0.5005	0.3372	0.4946	0.4961	0.2915	0.4995	0.5039	0.3127	0.6628	0.7085	0.6873	0.42	0.37	TRUE	1.46929
1nc100_020_452	NCU08050.2	1.1888	1	1.34761	1.24951	0.23232	0.19576	0.2572	0.24082	0.25536	0.21948	0.26502	0.26462	0.15011	0.15011	0.15011	0.15011	0.06668	0.06668	0.06668	0.06668	0.20097	0.20097	0.20097	0.20097	0.8988	0.1824	0.3714	0.1012	0.0463	0.0674	0.8176	0.9537	0.7102	0.6286	0.9326	0.2898	0.27	0.23	TRUE	5.11934
1nc100_110_1525	NCU08058.2	1.11058	1	1.06557	1.02521	0.26787	0.24737	0.25878	0.26089	0.30105	0.28882	0.30135	0.3001	0.20162	0.20162	0.20162	0.20162	0.08864	0.08864	0.08864	0.08864	0.2524	0.2524	0.2524	0.2524	0.7281	0.5899	0.656	0.2719	0.3708	0.4382	0.4101	0.6292	0.5875	0.344	0.5618	0.4125	0.35	0.3	TRUE	3.13418
1nc100_180_1156	NCU08066.2	1.20757	1	1.13379	1.04751	0.25155	0.21139	0.25422	0.24038	0.27422	0.25597	0.2694	0.2669	0.17571	0.17571	0.17571	0.17571	0.07797	0.07797	0.07797	0.07797	0.22515	0.22515	0.22515	0.22515	0.8789	0.6654	0.7884	0.1211	0.2439	0.38	0.3346	0.7561	0.6843	0.2116	0.62	0.3157	0.3	0.26	TRUE	3.22695
1nc100_360_32	NCU08083.2	1.34988	1	1.06123	1.1687	0.58404	0.45996	0.57948	0.7472	0.62496	0.62659	0.79768	1.08557	0.33286	0.33286	0.33286	0.33286	0.17932	0.17932	0.17932	0.17932	0.67141	0.67141	0.67141	0.67141	0.8056	0.7937	0.6177	0.1944	0.4591	0.3571	0.2063	0.5409	0.4307	0.3823	0.6429	0.5693	0.18	0.21	TRUE	0.436531
1nc100_400_241	NCU08087.2	1.39759	1	1.14084	1.14743	0.28407	0.20872	0.2403	0.24961	0.29928	0.24443	0.2619	0.27285	0.16615	0.16615	0.16615	0.16615	0.07356	0.07356	0.07356	0.07356	0.22085	0.22085	0.22085	0.22085	0.9696	0.9036	0.8686	0.0304	0.2222	0.1785	0.0964	0.7778	0.4841	0.1314	0.8215	0.5159	0.29	0.25	TRUE	2.94269
1nc100_430_186	1nc100_430	1.10307	1	1.06909	1.07664	0.35289	0.31944	0.34996	0.35713	0.43019	0.37254	0.39434	0.38886	0.21277	0.21277	0.21277	0.21277	0.1094	0.1094	0.1094	0.1094	0.39869	0.39869	0.39869	0.39869	0.6998	0.5527	0.5402	0.3002	0.3949	0.3649	0.4473	0.6051	0.4872	0.4598	0.6351	0.5128	0.39	0.35	TRUE	3.01765
1nc104_030_1199	NCU08107.2	1.23958	1	1.32747	1.18407	0.24024	0.2045	0.26995	0.24087	0.26837	0.24819	0.27485	0.26616	0.15713	0.15713	0.15713	0.15713	0.06897	0.06897	0.06897	0.06897	0.21866	0.21866	0.21866	0.21866	0.9235	0.2981	0.6156	0.0765	0.0588	0.1215	0.7019	0.9412	0.7939	0.3844	0.8785	0.2061	0.28	0.24	TRUE	3.00575
1nc104_060_1125	NCU08111.2	1.16928	1	1.14134	1.0235	0.24924	0.22092	0.24845	0.22751	0.27809	0.2555	0.27315	0.26349	0.17848	0.17848	0.17848	0.17848	0.07716	0.07716	0.07716	0.07716	0.23065	0.23065	0.23065	0.23065	0.8386	0.5606	0.7664	0.1614	0.2314	0.4461	0.4394	0.7686	0.7526	0.2336	0.5539	0.2474	0.31	0.27	TRUE	3.94294
1nc104_070_1089	NCU08112.2	1.57175	1	1.2901	1.00287	0.34048	0.23465	0.31829	0.24686	0.36018	0.2999	0.34156	0.29198	0.19393	0.19393	0.19393	0.19393	0.08235	0.08235	0.08235	0.08235	0.24604	0.24604	0.24604	0.24604	0.9849	0.8682	0.9749	0.0151	0.1177	0.4874	0.1318	0.8823	0.9115	0.0251	0.5126	0.0885	0.32	0.29	TRUE	2.07638
1nc106_020_2975	NCU08115.2	1.10368	1	1.13093	1.0393	0.17079	0.16013	0.17571	0.17201	0.18246	0.17655	0.19121	0.17905	0.1227	0.1227	0.1227	0.1227	0.05321	0.05321	0.05321	0.05321	0.16317	0.16317	0.16317	0.16317	0.8236	0.4138	0.6897	0.1764	0.1626	0.351	0.5862	0.8374	0.7874	0.3103	0.649	0.2126	0.23	0.2	TRUE	6.45785
1nc106_040_1846	NCU08117.2	1.13282	1	1.18142	1.00382	0.28645	0.26909	0.31527	0.29249	0.34553	0.32542	0.34646	0.34402	0.22491	0.22491	0.22491	0.22491	0.09519	0.09519	0.09519	0.09519	0.27631	0.27631	0.27631	0.27631	0.7463	0.4076	0.7029	0.2537	0.2377	0.493	0.5924	0.7623	0.7769	0.2971	0.507	0.2231	0.37	0.33	TRUE	2.03107
1nc120_060_159	NCU07431.2	1.28089	1	1.04681	1.36753	0.56853	0.43729	0.57001	0.87031	0.64072	0.60869	0.81802	1.11885	0.31209	0.31209	0.31209	0.31209	0.17407	0.17407	0.17407	0.17407	0.67901	0.67901	0.67901	0.67901	0.7849	0.765	0.45	0.2151	0.4622	0.2318	0.235	0.5378	0.3176	0.55	0.7682	0.6824	0.32	0.49	TRUE	0.909456
1nc120_160_125	NCU07441.2	1.10245	1	1.19642	1.06793	0.17469	0.1634	0.18229	0.16807	0.179	0.17476	0.19753	0.1882	0.11872	0.11872	0.11872	0.11872	0.0534	0.0534	0.0534	0.0534	0.17596	0.17596	0.17596	0.17596	0.8256	0.2142	0.6122	0.1744	0.0866	0.2605	0.7858	0.9134	0.8514	0.3878	0.7395	0.1486	0.23	0.19	TRUE	6.83839
1nc120_230_252	NCU07449.2	1.09483	1	1.07332	1.01515	0.14549	0.13788	0.14419	0.13934	0.16219	0.15017	0.15377	0.14929	0.10451	0.10451	0.10451	0.10451	0.04662	0.04662	0.04662	0.04662	0.15121	0.15121	0.15121	0.15121	0.8327	0.5917	0.7669	0.1673	0.2545	0.4337	0.4083	0.7455	0.7293	0.2331	0.5663	0.2707	0.2	0.17	TRUE	8.03072
1nc120_250_1583	NCU07451.2	1.36282	1	2.35861	1.27828	0.44496	0.36199	0.65268	0.4134	0.57965	0.495	0.62637	0.50892	0.27803	0.27803	0.27803	0.27803	0.1187	0.1187	0.1187	0.1187	0.32112	0.32112	0.32112	0.32112	0.8711	0.0275	0.5908	0.1289	0.0081	0.1528	0.9725	0.9919	0.9848	0.4092	0.8472	0.0152	0.4	0.38	TRUE	-3.28474
1nc120_270_778	NCU07453.2	2.28611	1	2.59685	1.65131	0.34932	0.1859	0.37039	0.27311	0.36754	0.22579	0.37745	0.33214	0.12694	0.12694	0.12694	0.12694	0.05546	0.05546	0.05546	0.05546	0.17273	0.17273	0.17273	0.17273	0.9999	0.127	0.9795	0.0001	0	0.002	0.873	1	0.9963	0.0205	0.998	0.0037	0.22	0.2	TRUE	6.31319
1nc130_010_555	NCU07456.2	1.10661	1	1.21818	1.13883	0.15513	0.15289	0.15658	0.16988	0.1685	0.15715	0.17562	0.17611	0.10865	0.10865	0.10865	0.10865	0.047	0.047	0.047	0.047	0.15251	0.15251	0.15251	0.15251	0.8501	0.1611	0.3936	0.1499	0.0518	0.1012	0.8389	0.9482	0.763	0.6064	0.8988	0.237	0.21	0.18	TRUE	7.36366
1nc130_060_2348	NCU07461.2	1.08289	1	1.11746	1.09612	0.27931	0.27872	0.30924	0.30884	0.33001	0.3317	0.34341	0.35216	0.22704	0.22704	0.22704	0.22704	0.09957	0.09957	0.09957	0.09957	0.28618	0.28618	0.28618	0.28618	0.6656	0.4344	0.4772	0.3344	0.3112	0.3235	0.5656	0.6888	0.5397	0.5228	0.6765	0.4603	0.38	0.33	TRUE	2.14064
1nc140_030_750	NCU07482.2	1.29156	1	1.22586	1.08131	0.30262	0.24613	0.26872	0.25134	0.34008	0.30497	0.27869	0.27542	0.16336	0.16336	0.16336	0.16336	0.07844	0.07844	0.07844	0.07844	0.2614	0.2614	0.2614	0.2614	0.9009	0.6439	0.8279	0.0991	0.1371	0.294	0.3561	0.8629	0.7953	0.1721	0.706	0.2047	0.31	0.27	TRUE	4.61729
1nc140_130_697	NCU07493.2	1.11124	1	1.17859	1.26832	0.43673	0.36055	0.4243	0.40345	0.55295	0.45601	0.49626	0.42745	0.25094	0.25094	0.25094	0.25094	0.12465	0.12465	0.12465	0.12465	0.43476	0.43476	0.43476	0.43476	0.6463	0.4207	0.3263	0.3537	0.2833	0.1469	0.5793	0.7167	0.3778	0.6737	0.8531	0.6222	0.45	0.4	TRUE	1.59785
1nc140_180_3421	NCU07498.2	1.10178	1	1.12993	1.09883	0.16678	0.1473	0.16405	0.16864	0.17182	0.16141	0.17612	0.17648	0.11012	0.11012	0.11012	0.11012	0.04886	0.04886	0.04886	0.04886	0.16283	0.16283	0.16283	0.16283	0.8349	0.3931	0.5118	0.1651	0.1465	0.1755	0.6069	0.8535	0.6177	0.4882	0.8245	0.3823	0.21	0.18	TRUE	7.25582
1nc140_190_583	NCU07499.2	1.11766	1	1.01357	1.04491	0.22322	0.20577	0.21112	0.21149	0.24363	0.2327	0.23183	0.23633	0.15853	0.15853	0.15853	0.15853	0.07029	0.07029	0.07029	0.07029	0.21332	0.21332	0.21332	0.21332	0.782	0.7583	0.6575	0.218	0.47	0.3617	0.2417	0.53	0.4145	0.3425	0.6383	0.5855	0.29	0.25	TRUE	3.99232
1nc140_290_888	NCU07509.2	1.09306	1	1.22579	1.14574	0.08532	0.08147	0.09322	0.08843	0.08647	0.08133	0.09366	0.09295	0.05649	0.05649	0.05649	0.05649	0.02558	0.02558	0.02558	0.02558	0.08828	0.08828	0.08828	0.08828	0.9386	0.0296	0.1993	0.0614	0.0074	0.0184	0.9704	0.9926	0.8959	0.8007	0.9816	0.1041	0.35	0.31	TRUE	12.3109
1nc200_090_462	NCU09077.2	1.27039	1	1.21388	1.07085	0.29575	0.2588	0.38147	0.44368	0.28696	0.26262	0.43661	0.52466	0.1126	0.1126	0.1126	0.1126	0.0717	0.0717	0.0717	0.0717	0.41172	0.41172	0.41172	0.41172	0.9404	0.6652	0.8066	0.0596	0.1328	0.3203	0.3348	0.8672	0.7218	0.1934	0.6797	0.2782	0.29	0.26	TRUE	6.98417
1nc200_100_302	NCU09078.2	1.12345	1	1.11382	1.04927	0.20874	0.19217	0.20437	0.19691	0.22215	0.20435	0.22871	0.22948	0.14291	0.14291	0.14291	0.14291	0.06243	0.06243	0.06243	0.06243	0.19987	0.19987	0.19987	0.19987	0.8106	0.5298	0.6809	0.1894	0.2306	0.3472	0.4702	0.7694	0.6872	0.3191	0.6528	0.3128	0.27	0.23	TRUE	5.51654
1nc200_260_841	NCU09094.2	1.01369	1	1.04292	1.02511	0.13902	0.14504	0.14614	0.14271	0.1465	0.15406	0.15298	0.15123	0.10594	0.10594	0.10594	0.10594	0.04698	0.04698	0.04698	0.04698	0.15193	0.15193	0.15193	0.15193	0.5651	0.3767	0.4633	0.4349	0.3405	0.3841	0.6233	0.6595	0.5753	0.5367	0.6159	0.4247	0.21	0.18	TRUE	7.73811
1nc200_270_458	NCU09095.2	1.13087	1	1.27569	1.09199	0.11964	0.10811	0.12426	0.11869	0.12456	0.11769	0.13313	0.12083	0.07833	0.07833	0.07833	0.07833	0.03533	0.03533	0.03533	0.03533	0.1153	0.1153	0.1153	0.1153	0.9397	0.0584	0.6751	0.0603	0.0113	0.1156	0.9416	0.9887	0.9677	0.3249	0.8844	0.0323	0.16	0.26	TRUE	9.5764
1nc200_290_2696	NCU09097.2	1.35466	1	1.19719	1.09027	0.14578	0.11718	0.13453	0.13275	0.15853	0.12807	0.14427	0.13677	0.08631	0.08631	0.08631	0.08631	0.03835	0.03835	0.03835	0.03835	0.12186	0.12186	0.12186	0.12186	0.9953	0.9294	0.9789	0.0047	0.0398	0.1396	0.0706	0.9602	0.8775	0.0211	0.8604	0.1225	0.17	0.36	TRUE	9.22468
1nc200_320_1025	NCU09100.2	1.08745	1	1.17539	1.05315	0.21094	0.20129	0.23187	0.20843	0.23018	0.2246	0.25504	0.23461	0.15552	0.15552	0.15552	0.15552	0.06807	0.06807	0.06807	0.06807	0.21012	0.21012	0.21012	0.21012	0.7338	0.2783	0.5838	0.2662	0.1629	0.3544	0.7217	0.8371	0.7785	0.4162	0.6456	0.2215	0.29	0.25	TRUE	4.88168
1nc200_340_1722	NCU09102.2	1.10654	1	1.16894	1.03123	0.25039	0.22668	0.27527	0.23739	0.27808	0.27766	0.28499	0.2766	0.18533	0.18533	0.18533	0.18533	0.0797	0.0797	0.0797	0.0797	0.24241	0.24241	0.24241	0.24241	0.7434	0.3697	0.6473	0.2566	0.2126	0.4237	0.6303	0.7874	0.7651	0.3527	0.5763	0.2349	0.33	0.29	TRUE	3.63847
1nc200_350_1557	NCU09103.2	1.05389	1	1.10797	1.0183	0.15509	0.15078	0.16077	0.15361	0.16571	0.16673	0.16573	0.15645	0.11174	0.11174	0.11174	0.11174	0.04913	0.04913	0.04913	0.04913	0.156	0.156	0.156	0.156	0.7048	0.301	0.6251	0.2952	0.1914	0.4238	0.699	0.8086	0.8044	0.3749	0.5762	0.1956	0.22	0.19	TRUE	6.07331
1nc250_040_1603	NCU09805.2	1.68762	1	1.27286	21.8336	1.08919	0.53393	0.73127	5.47767	3.9055	1.57133	2.35551	1.95451	0.47832	0.47832	0.47832	0.47832	0.23261	0.23261	0.23261	0.23261	0.71446	0.71446	0.71446	0.71446	0.8415	0.6684	0.0018	0.1585	0.3352	0	0.3316	0.6648	0	0.9982	1	1	0.28	0.21	TRUE	-1.95574
1nc250_060_4119	NCU09807.2	3.47576	1	7.90658	1.75623	0.67721	0.28898	1.17297	0.46914	0.92658	0.53964	0.73258	0.58618	0.11145	0.11145	0.11145	0.11145	0.0609	0.0609	0.0609	0.0609	0.30749	0.30749	0.30749	0.30749	0.9994	0.0029	0.9935	0.0006	0.0005	0.0312	0.9971	0.9995	1	0.0065	0.9688	0	0.19	0.23	TRUE	6.68246
1nc255_010_1436	NCU09815.2	1.11748	1	1.09996	1.01454	0.12691	0.11543	0.13225	0.12052	0.12964	0.12384	0.12841	0.12448	0.08623	0.08623	0.08623	0.08623	0.03902	0.03902	0.03902	0.03902	0.12504	0.12504	0.12504	0.12504	0.9058	0.584	0.8554	0.0942	0.1448	0.4302	0.416	0.8552	0.8514	0.1446	0.5698	0.1486	0.17	0.23	TRUE	9.42721
1nc255_070_4909	NCU09820.2	1.18621	1	1.27541	1.0677	0.16054	0.14057	0.16394	0.15017	0.17006	0.15366	0.18085	0.16141	0.10265	0.10265	0.10265	0.10265	0.04717	0.04717	0.04717	0.04717	0.15067	0.15067	0.15067	0.15067	0.9469	0.215	0.8358	0.0531	0.0273	0.2307	0.785	0.9727	0.9567	0.1642	0.7693	0.0433	0.2	0.18	TRUE	7.96056
1nc310_120_1885	NCU01899.2	1.18566	1	1.1895	1.17262	0.23863	0.21352	0.24691	0.24596	0.26838	0.24856	0.25287	0.26267	0.16263	0.16263	0.16263	0.16263	0.07179	0.07179	0.07179	0.07179	0.23094	0.23094	0.23094	0.23094	0.8744	0.4935	0.5276	0.1256	0.155	0.1373	0.5065	0.845	0.5344	0.4724	0.8627	0.4656	0.3	0.26	TRUE	4.64909
1nc310_140_3473	NCU01901.2	1.25469	1	1.20482	1.02203	0.26095	0.21818	0.25554	0.22789	0.27831	0.24817	0.2731	0.25701	0.17071	0.17071	0.17071	0.17071	0.07381	0.07381	0.07381	0.07381	0.22782	0.22782	0.22782	0.22782	0.9179	0.6142	0.8697	0.0821	0.1467	0.4387	0.3858	0.8533	0.8538	0.1303	0.5613	0.1462	0.31	0.27	TRUE	4.25476
1nc310_160_935	NCU01903.2	1.0979	1	1.16159	1.0084	0.23761	0.22981	0.26704	0.23446	0.26352	0.27307	0.28923	0.28157	0.18439	0.18439	0.18439	0.18439	0.0791	0.0791	0.0791	0.0791	0.2308	0.2308	0.2308	0.2308	0.7191	0.3592	0.6748	0.2809	0.2201	0.4707	0.6408	0.7799	0.7959	0.3252	0.5293	0.2041	0.33	0.29	TRUE	3.61679
1nc310_190_893	NCU01906.2	1.40547	1	1.2755	1.36802	0.35127	0.2713	0.31609	0.36835	0.40165	0.35021	0.37277	0.42015	0.21725	0.21725	0.21725	0.21725	0.09252	0.09252	0.09252	0.09252	0.26056	0.26056	0.26056	0.26056	0.9485	0.6974	0.5474	0.0515	0.1427	0.083	0.3026	0.8573	0.3483	0.4526	0.917	0.6517	0.37	0.33	TRUE	0.0461823
1nc310_230_2219	NCU01911.2	1.12998	1	1.22274	1.14881	0.372	0.28889	0.45476	0.3573	0.39417	0.34722	0.5302	0.44196	0.20613	0.20613	0.20613	0.20613	0.10844	0.10844	0.10844	0.10844	0.3997	0.3997	0.3997	0.3997	0.7412	0.3694	0.468	0.2588	0.2212	0.2248	0.6306	0.7788	0.6112	0.532	0.7752	0.3888	0.39	0.36	TRUE	3.1985
1nc310_240_1551	NCU01912.2	1.47559	1	1.75662	1.03768	0.8613	0.4129	0.82391	0.41342	1.09713	0.57751	0.93685	0.54813	0.26539	0.26539	0.26539	0.26539	0.15217	0.15217	0.15217	0.15217	0.60892	0.60892	0.60892	0.60892	0.8494	0.3519	0.796	0.1506	0.0857	0.4454	0.6481	0.9143	0.9469	0.204	0.5546	0.0531	0.46	0.46	TRUE	2.59576
1nc310_330_1762	NCU01921.2b	1.17848	1	1.09857	1.04733	0.38183	0.28357	0.3655	0.31818	0.42566	0.34617	0.43337	0.37897	0.23398	0.23398	0.23398	0.23398	0.10878	0.10878	0.10878	0.10878	0.33483	0.33483	0.33483	0.33483	0.7861	0.6142	0.6786	0.2139	0.3534	0.4133	0.3858	0.6466	0.5852	0.3214	0.5867	0.4148	0.41	0.37	TRUE	2.12724
1nc310_340_611	NCU01921.2c	1.21958	1	1.41945	1.07103	0.17746	0.16358	0.23746	0.19464	0.18592	0.19219	0.24617	0.22317	0.10588	0.10588	0.10588	0.10588	0.05167	0.05167	0.05167	0.05167	0.19686	0.19686	0.19686	0.19686	0.9517	0.0816	0.8506	0.0483	0.0187	0.2472	0.9184	0.9813	0.9643	0.1494	0.7528	0.0357	0.22	0.2	TRUE	6.54164
1nc320_040_1386	NCU01944.2	2.89223	1	2.93519	1.6673	0.9371	0.39759	1.05944	0.74686	0.92603	0.63898	1.02801	1.14573	0.26536	0.26536	0.26536	0.26536	0.13735	0.13735	0.13735	0.13735	0.47513	0.47513	0.47513	0.47513	0.9964	0.4806	0.9287	0.0036	0.0093	0.0771	0.5194	0.9907	0.9282	0.0713	0.9229	0.0718	0.43	0.43	TRUE	1.18194
1nc320_140_829	NCU01955.2	1.38406	1	1.21115	1.06432	0.35013	0.27866	0.3252	0.30595	0.37403	0.3352	0.36693	0.37705	0.229	0.229	0.229	0.229	0.09853	0.09853	0.09853	0.09853	0.27366	0.27366	0.27366	0.27366	0.9371	0.7586	0.8632	0.0629	0.2086	0.3821	0.2414	0.7914	0.7325	0.1368	0.6179	0.2675	0.38	0.34	TRUE	1.90224
1nc338_030_1095	NCU02055.2	1.07999	1	1.06105	1.03887	0.23641	0.21628	0.23717	0.23045	0.25888	0.25855	0.2681	0.26259	0.17868	0.17868	0.17868	0.17868	0.07813	0.07813	0.07813	0.07813	0.22913	0.22913	0.22913	0.22913	0.6885	0.5443	0.5802	0.3115	0.3667	0.4018	0.4557	0.6333	0.5489	0.4198	0.5982	0.4511	0.32	0.28	TRUE	3.83451
1nc338_040_1340	NCU02056.2	1.22031	1	1.09089	1.04745	0.28606	0.25168	0.27644	0.26778	0.30754	0.28052	0.31986	0.32301	0.20265	0.20265	0.20265	0.20265	0.08733	0.08733	0.08733	0.08733	0.25274	0.25274	0.25274	0.25274	0.8623	0.7415	0.7681	0.1377	0.3276	0.3899	0.2585	0.6724	0.5843	0.2319	0.6101	0.4157	0.35	0.31	TRUE	2.81509
1nc338_050_3850	NCU02057.2	1.52842	1	1.32569	1.26778	0.38574	0.2682	0.34158	0.34653	0.40767	0.32454	0.38303	0.41613	0.21165	0.21165	0.21165	0.21165	0.09254	0.09254	0.09254	0.09254	0.27236	0.27236	0.27236	0.27236	0.9731	0.7829	0.8018	0.0269	0.1051	0.1181	0.2171	0.8949	0.5921	0.1982	0.8819	0.4079	0.36	0.33	TRUE	2.33876
1nc340_190_4192	NCU02082.2	1.14409	1	1.01643	1.01978	0.17873	0.16114	0.1661	0.15991	0.189	0.17433	0.1713	0.18387	0.12414	0.12414	0.12414	0.12414	0.05565	0.05565	0.05565	0.05565	0.17202	0.17202	0.17202	0.17202	0.8813	0.8562	0.814	0.1187	0.4451	0.4165	0.1438	0.5549	0.4878	0.186	0.5835	0.5122	0.24	0.21	TRUE	6.11994
1nc340_200_7566	NCU02083.2	1.2308	1	1.28225	1.02711	0.17555	0.14411	0.17063	0.1481	0.17046	0.1606	0.17262	0.15845	0.10458	0.10458	0.10458	0.10458	0.04586	0.04586	0.04586	0.04586	0.15257	0.15257	0.15257	0.15257	0.9687	0.3191	0.9379	0.0313	0.0297	0.3826	0.6809	0.9703	0.9757	0.0621	0.6174	0.0243	0.21	0.18	TRUE	6.93511
1nc340_210_970	NCU02084.2	1.08558	1	1.20193	1.07084	0.14194	0.13395	0.15127	0.13443	0.14352	0.13669	0.15931	0.14996	0.09651	0.09651	0.09651	0.09651	0.04288	0.04288	0.04288	0.04288	0.13776	0.13776	0.13776	0.13776	0.8224	0.1255	0.5626	0.1776	0.0494	0.2129	0.8745	0.9506	0.8943	0.4374	0.7871	0.1057	0.19	0.17	TRUE	8.10423
1nc344_020_3391	NCU02091.2	1.06842	1	1.12539	1.04652	0.07341	0.07335	0.07457	0.07376	0.07406	0.07431	0.07886	0.07424	0.04913	0.04913	0.04913	0.04913	0.02225	0.02225	0.02225	0.02225	0.08038	0.08038	0.08038	0.08038	0.9145	0.12	0.6697	0.0855	0.0309	0.1563	0.88	0.9691	0.9323	0.3303	0.8437	0.0677	0.28	0.23	TRUE	13.6357
1nc346_020_1950	NCU02094.2	1.76062	1	1.64629	1.03014	0.53478	0.27126	0.53907	0.30207	0.49141	0.34965	0.59892	0.43162	0.18458	0.18458	0.18458	0.18458	0.0967	0.0967	0.0967	0.0967	0.37706	0.37706	0.37706	0.37706	0.9844	0.6324	0.9629	0.0156	0.0478	0.4261	0.3676	0.9522	0.95	0.0371	0.5739	0.05	0.35	0.34	TRUE	2.31693
1nc348_050_274	NCU02102.2b	1.07258	1	1.19312	1.03136	0.17335	0.16414	0.19544	0.17832	0.20037	0.19087	0.20332	0.19375	0.1259	0.1259	0.1259	0.1259	0.05522	0.05522	0.05522	0.05522	0.18497	0.18497	0.18497	0.18497	0.7422	0.175	0.6139	0.2578	0.1053	0.3858	0.825	0.8947	0.8813	0.3861	0.6142	0.1187	0.25	0.21	TRUE	6.21935
1nc356_130_2511	NCU02134.2	1.00451	1	1.15744	1.37627	0.25811	0.27192	0.29591	0.34874	0.30657	0.3219	0.34031	0.37835	0.20827	0.20827	0.20827	0.20827	0.08903	0.08903	0.08903	0.08903	0.27479	0.27479	0.27479	0.27479	0.5052	0.2163	0.0853	0.4948	0.2394	0.0671	0.7837	0.7606	0.1791	0.9147	0.9329	0.8209	0.36	0.33	TRUE	2.51589
1nc360_030_1337	NCU02147.2	1.083	1	2.08007	1.18317	0.59619	0.49221	1.31939	0.53969	1.03167	0.71471	1.22675	0.76197	0.32615	0.32615	0.32615	0.32615	0.17967	0.17967	0.17967	0.17967	0.67593	0.67593	0.67593	0.67593	0.602	0.1557	0.3949	0.398	0.112	0.2884	0.8443	0.888	0.8689	0.6051	0.7116	0.1311	0.32	0.27	TRUE	1.72601
1nc360_070_1585	NCU02151.2	1.75692	1	1.86186	1.10754	0.53097	0.35323	0.53867	0.3962	0.54576	0.49036	0.57284	0.56385	0.25713	0.25713	0.25713	0.25713	0.1176	0.1176	0.1176	0.1176	0.38651	0.38651	0.38651	0.38651	0.9786	0.3941	0.9257	0.0214	0.0304	0.3462	0.6059	0.9696	0.9627	0.0743	0.6538	0.0373	0.43	0.4	TRUE	-0.274578
1nc360_090_616	NCU02152.2	1.14743	1	1.19406	1.71936	0.46914	0.38304	0.5599	0.70753	0.6959	0.53097	0.76937	0.7309	0.31588	0.31588	0.31588	0.31588	0.15482	0.15482	0.15482	0.15482	0.50286	0.50286	0.50286	0.50286	0.702	0.4393	0.15	0.298	0.312	0.0578	0.5607	0.688	0.1601	0.85	0.9422	0.8399	0.18	0.48	TRUE	0.801109
1nc360_270_2094	NCU02170.2	1.49379	1	1.08355	1.17594	0.23296	0.15745	0.19131	0.22052	0.2281	0.17346	0.21747	0.23842	0.10767	0.10767	0.10767	0.10767	0.05224	0.05224	0.05224	0.05224	0.20274	0.20274	0.20274	0.20274	0.9929	0.9868	0.948	0.0071	0.2398	0.074	0.0132	0.7602	0.2407	0.052	0.926	0.7593	0.24	0.21	TRUE	6.1473
1nc360_280_513	NCU02171.2	1.06969	1	1.15865	1.04877	0.16728	0.15839	0.19059	0.17308	0.18918	0.1882	0.19594	0.17997	0.12512	0.12512	0.12512	0.12512	0.05571	0.05571	0.05571	0.05571	0.17275	0.17275	0.17275	0.17275	0.7306	0.2359	0.5625	0.2694	0.1405	0.3265	0.7641	0.8595	0.8088	0.4375	0.6735	0.1912	0.25	0.21	TRUE	6.24565
1nc380_006_3294	NCU02173.2	1.27727	1	1.15167	1.0618	0.27291	0.18754	0.22918	0.19692	0.26968	0.19996	0.26738	0.22316	0.13066	0.13066	0.13066	0.13066	0.06568	0.06568	0.06568	0.06568	0.23925	0.23925	0.23925	0.23925	0.9543	0.771	0.8776	0.0457	0.1676	0.2988	0.229	0.8324	0.7576	0.1224	0.7012	0.2424	0.27	0.24	TRUE	6.0333
1nc380_020_552	NCU02176.2	1.59325	1	1.34863	1.04644	0.21455	0.15289	0.18406	0.16598	0.22605	0.16678	0.19215	0.17789	0.11092	0.11092	0.11092	0.11092	0.04956	0.04956	0.04956	0.04956	0.15866	0.15866	0.15866	0.15866	0.9981	0.9384	0.9942	0.0019	0.0163	0.3193	0.0616	0.9837	0.9801	0.0058	0.6807	0.0199	0.21	0.19	TRUE	6.42364
1nc380_040_33	1nc380_040	1.4226	1	1.15874	1.08528	0.17705	0.10528	0.17744	0.1295	0.16494	0.12254	0.16436	0.15668	0.06188	0.06188	0.06188	0.06188	0.0344	0.0344	0.0344	0.0344	0.18547	0.18547	0.18547	0.18547	0.9936	0.9716	0.9803	0.0064	0.071	0.0998	0.0284	0.929	0.8024	0.0197	0.9002	0.1976	0.16	0.38	TRUE	10.7508
1nc396_010_959	1nc396_010	1.33562	1	1.16334	1.12092	0.56075	0.43442	0.51933	0.49454	0.64651	0.6028	0.65961	0.6426	0.33199	0.33199	0.33199	0.33199	0.15977	0.15977	0.15977	0.15977	0.50758	0.50758	0.50758	0.50758	0.8362	0.6531	0.6825	0.1638	0.3471	0.3759	0.3469	0.6529	0.5536	0.3175	0.6241	0.4464	0.41	0.2	TRUE	0.336601
1nc400_120_831	NCU02518.2	1.2063	1	1.14506	1.01271	0.12273	0.10798	0.12196	0.10778	0.12553	0.11617	0.12352	0.11597	0.07628	0.07628	0.07628	0.07628	0.03452	0.03452	0.03452	0.03452	0.12018	0.12018	0.12018	0.12018	0.9818	0.7791	0.9654	0.0182	0.063	0.4137	0.2209	0.937	0.9441	0.0346	0.5863	0.0559	0.16	0.41	TRUE	10.3599
1nc400_150_1054	NCU02521.2	1.69066	1	1.18585	1.0174	0.59894	0.3544	0.4723	0.38027	0.66664	0.46301	0.60557	0.50879	0.33763	0.33763	0.33763	0.33763	0.13829	0.13829	0.13829	0.13829	0.36955	0.36955	0.36955	0.36955	0.9575	0.8376	0.9154	0.0425	0.3138	0.4702	0.1624	0.6862	0.6965	0.0846	0.5298	0.3035	0.49	0.46	TRUE	-3.81475
1nc400_200_374	NCU02526.2	1.80654	1	1.96361	1.45763	0.65344	0.39367	0.67537	0.53074	0.71932	0.56772	0.7634	0.69932	0.32906	0.32906	0.32906	0.32906	0.13567	0.13567	0.13567	0.13567	0.34373	0.34373	0.34373	0.34373	0.9678	0.3969	0.7361	0.0322	0.0386	0.1117	0.6031	0.9614	0.8406	0.2639	0.8883	0.1594	0.48	0.46	TRUE	-2.17433
1nc400_360_1393	NCU02541.2	1.17711	1	1.59098	1.00388	0.22305	0.20462	0.25006	0.17509	0.2488	0.23125	0.239	0.19998	0.11812	0.11812	0.11812	0.11812	0.05794	0.05794	0.05794	0.05794	0.21929	0.21929	0.21929	0.21929	0.8779	0.0222	0.8701	0.1221	0.0109	0.4737	0.9778	0.9891	0.9949	0.1299	0.5263	0.0051	0.25	0.23	TRUE	6.00791
1nc400_500_784	NCU02555.2b	1.11073	1	1.18581	1.05216	0.19337	0.17705	0.2017	0.18725	0.20121	0.19619	0.20936	0.20602	0.13459	0.13459	0.13459	0.13459	0.05953	0.05953	0.05953	0.05953	0.18283	0.18283	0.18283	0.18283	0.8132	0.2855	0.6583	0.1868	0.1189	0.3306	0.7145	0.8811	0.8294	0.3417	0.6694	0.1706	0.26	0.23	TRUE	5.81521
1nc400_530_1515	NCU02558.2	1.35125	1	1.17459	1.08514	0.33093	0.30696	0.27612	0.29776	0.36918	0.39303	0.28685	0.32178	0.16169	0.16169	0.16169	0.16169	0.08601	0.08601	0.08601	0.08601	0.35903	0.35903	0.35903	0.35903	0.9167	0.8235	0.8661	0.0833	0.2035	0.3166	0.1765	0.7965	0.7201	0.1339	0.6834	0.2799	0.35	0.31	TRUE	4.3261
1nc418_050_2872	NCU02592.2	1.10579	1	1.05175	1.01744	0.23403	0.22338	0.22364	0.22603	0.25613	0.24632	0.26101	0.26383	0.179	0.179	0.179	0.179	0.07498	0.07498	0.07498	0.07498	0.22737	0.22737	0.22737	0.22737	0.7479	0.6322	0.6833	0.2521	0.3875	0.464	0.3678	0.6125	0.5804	0.3167	0.536	0.4196	0.33	0.29	TRUE	3.73106
1nc418_060_607	NCU02593.2	1.37711	1	1.24523	1.37528	0.49586	0.36636	0.5977	0.66824	0.56863	0.45672	0.74827	0.85711	0.27636	0.27636	0.27636	0.27636	0.14022	0.14022	0.14022	0.14022	0.47335	0.47335	0.47335	0.47335	0.8757	0.6644	0.508	0.1243	0.28	0.1489	0.3356	0.72	0.4142	0.492	0.8511	0.5858	0.48	0.45	TRUE	1.35624
1nc418_120_987	NCU02600.2	1.37738	1	1.18968	1.20507	0.4099	0.28898	0.45406	0.45744	0.379	0.34719	0.52243	0.58551	0.19207	0.19207	0.19207	0.19207	0.10077	0.10077	0.10077	0.10077	0.37913	0.37913	0.37913	0.37913	0.9245	0.7835	0.6971	0.0755	0.2533	0.167	0.2165	0.7467	0.4842	0.3029	0.833	0.5158	0.39	0.35	TRUE	3.33289
1nc420_020_1502	NCU02625.2	1.12638	1	1.0786	1.07847	0.27166	0.23976	0.26614	0.2645	0.29808	0.27537	0.30217	0.30438	0.20104	0.20104	0.20104	0.20104	0.08803	0.08803	0.08803	0.08803	0.24112	0.24112	0.24112	0.24112	0.7517	0.5996	0.5923	0.2483	0.3541	0.3287	0.4004	0.6459	0.501	0.4077	0.6713	0.499	0.36	0.32	TRUE	1.14282
1nc420_070_2307	NCU02630.2	1.02077	1	1.13871	1.01301	0.11442	0.1166	0.12438	0.10962	0.11857	0.11902	0.13071	0.12572	0.08294	0.08294	0.08294	0.08294	0.03697	0.03697	0.03697	0.03697	0.12741	0.12741	0.12741	0.12741	0.6179	0.0767	0.5394	0.3821	0.0777	0.4327	0.9233	0.9223	0.9261	0.4606	0.5673	0.0739	0.17	0.15	TRUE	9.48559
1nc425_050_993	NCU02641.2	1.02611	1	1.07231	1.05708	0.17433	0.17231	0.18519	0.17978	0.19163	0.18866	0.20266	0.21329	0.13498	0.13498	0.13498	0.13498	0.0599	0.0599	0.0599	0.0599	0.18799	0.18799	0.18799	0.18799	0.5815	0.3481	0.4072	0.4185	0.3039	0.3158	0.6519	0.6961	0.5468	0.5928	0.6842	0.4532	0.26	0.23	TRUE	5.98153
1nc430_110_277	1nc430_110	1.05612	1	1.27864	1.04217	0.20867	0.20758	0.26582	0.21538	0.24022	0.24547	0.27057	0.24477	0.16489	0.16489	0.16489	0.16489	0.07102	0.07102	0.07102	0.07102	0.22828	0.22828	0.22828	0.22828	0.6628	0.106	0.528	0.3372	0.0848	0.373	0.894	0.9152	0.9047	0.472	0.627	0.0953	0.31	0.27	TRUE	4.42278
1nc430_160_910	NCU02730.2	1.23249	1	1.49863	1.01891	0.39938	0.30423	0.48606	0.31039	0.46399	0.40205	0.53004	0.37505	0.24084	0.24084	0.24084	0.24084	0.10917	0.10917	0.10917	0.10917	0.32878	0.32878	0.32878	0.32878	0.8302	0.2243	0.7689	0.1698	0.0855	0.4624	0.7757	0.9145	0.9375	0.2311	0.5376	0.0625	0.42	0.38	TRUE	-1.02612
1nc430_240_599	NCU02738.2	1.15103	1	1.33692	1.22893	0.35032	0.29456	0.39577	0.368	0.38708	0.38686	0.44137	0.45435	0.25702	0.25702	0.25702	0.25702	0.11106	0.11106	0.11106	0.11106	0.29308	0.29308	0.29308	0.29308	0.7289	0.2449	0.3969	0.2711	0.1476	0.1837	0.7551	0.8524	0.6396	0.6031	0.8163	0.3604	0.43	0.38	TRUE	-2.44526
1nc430_270_768	NCU02740.2	1.11993	1	1.73813	1.0313	0.25657	0.24598	0.33804	0.24681	0.29729	0.26995	0.36893	0.2777	0.1802	0.1802	0.1802	0.1802	0.07855	0.07855	0.07855	0.07855	0.2351	0.2351	0.2351	0.2351	0.7674	0.0139	0.6782	0.2326	0.0091	0.4161	0.9861	0.9909	0.9931	0.3218	0.5839	0.0069	0.32	0.29	TRUE	3.65366
1nc432_010_3227	NCU02751.2	1.31731	1	1.81074	1.40326	0.33124	0.16361	0.37943	0.22104	0.4153	0.1793	0.3303	0.18358	0.05178	0.05178	0.05178	0.05178	0.03475	0.03475	0.03475	0.03475	0.31422	0.31422	0.31422	0.31422	0.9681	0.0482	0.2416	0.0319	0.0081	0.0138	0.9518	0.9919	0.9796	0.7584	0.9862	0.0204	0.18	0.16	TRUE	10.9708
1nc432_020_2916	NCU02752.2	1.18755	1	1.10037	1.07895	0.25635	0.21298	0.24866	0.23661	0.26865	0.24997	0.2624	0.28438	0.17496	0.17496	0.17496	0.17496	0.07745	0.07745	0.07745	0.07745	0.23717	0.23717	0.23717	0.23717	0.867	0.6973	0.7092	0.133	0.2901	0.3067	0.3027	0.7099	0.5586	0.2908	0.6933	0.4414	0.33	0.29	TRUE	3.90404
1nc434_020_0	NCU02761.2	1.46966	1	1.40086	1.128	0.24376	0.15659	0.2483	0.18678	0.26265	0.19233	0.25527	0.18934	0.10722	0.10722	0.10722	0.10722	0.05204	0.05204	0.05204	0.05204	0.20163	0.20163	0.20163	0.20163	0.9927	0.6642	0.965	0.0073	0.0233	0.1306	0.3358	0.9767	0.9613	0.035	0.8694	0.0387	0.23	0.21	TRUE	6.87315
1nc440_010_257	NCU09364.2	1.74081	1	2.75327	2.12124	0.68039	0.44097	1.10381	0.95913	0.98835	0.80279	1.06292	1.38136	0.36854	0.36854	0.36854	0.36854	0.1604	0.1604	0.1604	0.1604	0.45453	0.45453	0.45453	0.45453	0.9451	0.0935	0.3197	0.0549	0.0194	0.0458	0.9065	0.9806	0.7274	0.6803	0.9542	0.2726	0.2	0.15	TRUE	-2.59994
1nc444_050_775	NCU09376.2	1.21345	1	1.28566	1.07541	0.26767	0.24041	0.30786	0.25309	0.30658	0.29307	0.30547	0.30126	0.18815	0.18815	0.18815	0.18815	0.08362	0.08362	0.08362	0.08362	0.23883	0.23883	0.23883	0.23883	0.8716	0.3574	0.7332	0.1284	0.1118	0.3215	0.6426	0.8882	0.838	0.2668	0.6785	0.162	0.34	0.3	TRUE	3.53164
1nc448_080_357	NCU09314.2	1.13797	1	1.2343	1.00739	0.14739	0.12841	0.14845	0.12805	0.1449	0.13901	0.15633	0.13785	0.092	0.092	0.092	0.092	0.04172	0.04172	0.04172	0.04172	0.13762	0.13762	0.13762	0.13762	0.9252	0.1524	0.8811	0.0748	0.0332	0.4538	0.8476	0.9668	0.9757	0.1189	0.5462	0.0243	0.19	0.16	TRUE	7.98421
1nc450_130_1881	NCU09328.2	1.01134	1	1.0849	1.06355	0.27258	0.25852	0.30067	0.30545	0.28666	0.30573	0.35748	0.35094	0.19435	0.19435	0.19435	0.19435	0.09163	0.09163	0.09163	0.09163	0.30323	0.30323	0.30323	0.30323	0.5225	0.3332	0.4062	0.4775	0.3569	0.3721	0.6668	0.6431	0.5331	0.5938	0.6279	0.4669	0.37	0.33	TRUE	3.18496
1nc462_030_922	NCU03067.2	1.4441	1	1.19976	1.74897	0.44894	0.30123	0.5013	0.69779	0.49094	0.38176	0.64054	0.76156	0.20733	0.20733	0.20733	0.20733	0.1067	0.1067	0.1067	0.1067	0.42189	0.42189	0.42189	0.42189	0.9318	0.8207	0.2554	0.0682	0.262	0.0237	0.1793	0.738	0.1537	0.7446	0.9763	0.8463	0.4	0.38	TRUE	2.54739
1nc466_040_1033	NCU03091.2	1.36225	1	1.07349	1.12704	0.20824	0.15589	0.18447	0.17342	0.20241	0.15431	0.21891	0.1936	0.07886	0.07886	0.07886	0.07886	0.0437	0.0437	0.0437	0.0437	0.23442	0.23442	0.23442	0.23442	0.9873	0.9622	0.9395	0.0127	0.2322	0.0816	0.0378	0.7678	0.2883	0.0605	0.9184	0.7117	0.21	0.18	TRUE	9.29226
1nc470_020_100	NCU03099.2	1.01948	1	1.04033	1.09948	0.32637	0.22835	0.32642	0.23905	0.37086	0.23905	0.3568	0.24563	0.13363	0.13363	0.13363	0.13363	0.07232	0.07232	0.07232	0.07232	0.3171	0.3171	0.3171	0.3171	0.5509	0.4612	0.3294	0.4491	0.4162	0.2397	0.5388	0.5838	0.3347	0.6706	0.7603	0.6653	0.31	0.28	TRUE	5.87904
1nc470_130_1831	NCU03110.2	1.05767	1	1.07818	1.0764	0.18839	0.172	0.18132	0.18229	0.19127	0.19619	0.19793	0.21163	0.13585	0.13585	0.13585	0.13585	0.06066	0.06066	0.06066	0.06066	0.18054	0.18054	0.18054	0.18054	0.6803	0.4318	0.4408	0.3197	0.2848	0.2606	0.5682	0.7152	0.5081	0.5592	0.7394	0.4919	0.27	0.23	TRUE	5.86223
1nc478_020_623	NCU03154.2	1.03359	1	1.04647	1.3591	0.37233	0.39742	0.4005	0.59953	0.4624	0.5275	0.55288	0.69467	0.28379	0.28379	0.28379	0.28379	0.14237	0.14237	0.14237	0.14237	0.46135	0.46135	0.46135	0.46135	0.558	0.4612	0.224	0.442	0.4366	0.1902	0.5388	0.5634	0.2254	0.776	0.8098	0.7746	0.49	0.46	TRUE	0.93698
1nc480_020_2456	NCU03187.2	1.22827	1	1.00869	1.21012	0.33513	0.28644	0.31243	0.39317	0.39409	0.33173	0.4042	0.42871	0.22035	0.22035	0.22035	0.22035	0.10378	0.10378	0.10378	0.10378	0.32335	0.32335	0.32335	0.32335	0.842	0.8297	0.5257	0.158	0.4842	0.1801	0.1703	0.5158	0.2344	0.4743	0.8199	0.7656	0.41	0.37	TRUE	2.62568
1nc480_270_2048	NCU03212.2	1.02874	1	1.04162	1.08283	0.16571	0.161	0.16866	0.17141	0.17846	0.17505	0.17503	0.18714	0.1247	0.1247	0.1247	0.1247	0.05339	0.05339	0.05339	0.05339	0.17759	0.17759	0.17759	0.17759	0.6054	0.4582	0.337	0.3946	0.3675	0.2329	0.5418	0.6325	0.3634	0.663	0.7671	0.6366	0.25	0.22	TRUE	6.48693
1nc480_300_1844	NCU03215.2	1.18691	1	1.17287	1.01277	0.18611	0.16122	0.19762	0.16776	0.19778	0.18492	0.1909	0.17627	0.1232	0.1232	0.1232	0.1232	0.05462	0.05462	0.05462	0.05462	0.1866	0.1866	0.1866	0.1866	0.924	0.5458	0.8878	0.076	0.1172	0.4532	0.4542	0.8828	0.8984	0.1122	0.5468	0.1016	0.25	0.22	TRUE	6.48015
1nc480_500_2513	NCU03235.2	1.24028	1	1.21581	1.10572	0.29095	0.25942	0.33695	0.30448	0.33845	0.29719	0.37605	0.37295	0.18841	0.18841	0.18841	0.18841	0.08906	0.08906	0.08906	0.08906	0.30585	0.30585	0.30585	0.30585	0.8871	0.5562	0.7135	0.1129	0.1826	0.2691	0.4438	0.8174	0.6813	0.2865	0.7309	0.3187	0.37	0.33	TRUE	3.32256
1nc480_510_1371	NCU03237.2	1.23776	1	1.11632	1.00984	0.35841	0.30009	0.36444	0.35962	0.39583	0.33543	0.42334	0.38771	0.1561	0.1561	0.1561	0.1561	0.09881	0.09881	0.09881	0.09881	0.48776	0.48776	0.48776	0.48776	0.9014	0.726	0.8378	0.0986	0.2804	0.4756	0.274	0.7196	0.722	0.1622	0.5244	0.278	0.37	0.34	TRUE	5.05115
1nc483_030_1434	NCU03243.2	1.06132	1	1.02287	1.03569	0.16419	0.15196	0.16735	0.15504	0.18484	0.15686	0.18864	0.15519	0.09878	0.09878	0.09878	0.09878	0.04857	0.04857	0.04857	0.04857	0.18645	0.18645	0.18645	0.18645	0.7551	0.6329	0.5939	0.2449	0.4165	0.343	0.3671	0.5835	0.4489	0.4061	0.657	0.5511	0.22	0.2	TRUE	7.76262
1nc485_010_925	NCU03247.2	1.23082	1	1.11616	1.12559	0.2591	0.22134	0.24085	0.24792	0.28185	0.25146	0.25387	0.2863	0.17167	0.17167	0.17167	0.17167	0.07492	0.07492	0.07492	0.07492	0.22923	0.22923	0.22923	0.22923	0.8998	0.7401	0.6943	0.1002	0.2603	0.2113	0.2599	0.7397	0.4778	0.3057	0.7887	0.5222	0.32	0.29	TRUE	4.25187
1nc490_010_1419	NCU03253.2	1.86581	1	1.46829	1.07166	0.33931	0.20202	0.29048	0.22454	0.33155	0.25055	0.29653	0.28441	0.15417	0.15417	0.15417	0.15417	0.06733	0.06733	0.06733	0.06733	0.19965	0.19965	0.19965	0.19965	0.9973	0.9457	0.9927	0.0027	0.0238	0.307	0.0543	0.9762	0.9707	0.0073	0.693	0.0293	0.28	0.26	TRUE	4.62578
1nc490_080_431	NCU03261.2	1.03094	1	1.03126	1.02557	0.10124	0.09844	0.103	0.09927	0.10589	0.10329	0.10321	0.10105	0.07028	0.07028	0.07028	0.07028	0.03115	0.03115	0.03115	0.03115	0.11202	0.11202	0.11202	0.11202	0.692	0.497	0.5292	0.308	0.327	0.3415	0.503	0.673	0.5413	0.4708	0.6585	0.4587	0.15	0.49	TRUE	10.0659
1nc490_110_1000	NCU03265.2	1.18913	1	1.18828	1.09932	0.21092	0.15633	0.20601	0.16605	0.22126	0.1714	0.22523	0.18674	0.10425	0.10425	0.10425	0.10425	0.05157	0.05157	0.05157	0.05157	0.21595	0.21595	0.21595	0.21595	0.9329	0.5018	0.7439	0.0671	0.0947	0.1642	0.4982	0.9053	0.7956	0.2561	0.8358	0.2044	0.23	0.21	TRUE	7.33438
1nc490_120_1946	NCU03266.2	1.20661	1	1.3744	1.0677	0.27464	0.23621	0.31102	0.26722	0.322	0.28228	0.33179	0.29111	0.18851	0.18851	0.18851	0.18851	0.08194	0.08194	0.08194	0.08194	0.25004	0.25004	0.25004	0.25004	0.8654	0.2152	0.7436	0.1346	0.0633	0.3522	0.7848	0.9367	0.9237	0.2564	0.6478	0.0763	0.34	0.31	TRUE	3.05591
1nc490_170_233	NCU03271.2	1.30049	1	1.24838	1.06138	0.39675	0.32595	0.51413	0.46813	0.38845	0.39394	0.61567	0.61888	0.21727	0.21727	0.21727	0.21727	0.11094	0.11094	0.11094	0.11094	0.42326	0.42326	0.42326	0.42326	0.8808	0.5944	0.7538	0.1192	0.2295	0.4091	0.4056	0.7705	0.6839	0.2462	0.5909	0.3161	0.43	0.39	TRUE	1.18328
1nc495_040_2140	NCU03279.2	1.21405	1	1.23328	1.02264	0.21197	0.18369	0.20699	0.18369	0.22363	0.20395	0.22806	0.20459	0.13362	0.13362	0.13362	0.13362	0.05893	0.05893	0.05893	0.05893	0.19553	0.19553	0.19553	0.19553	0.923	0.4431	0.8839	0.077	0.0779	0.421	0.5569	0.9221	0.9286	0.1161	0.579	0.0714	0.27	0.23	TRUE	5.7991
1nc495_060_217	NCU03281.2	1.22696	1	1.06393	1.03193	0.11853	0.10976	0.10898	0.10945	0.1332	0.11262	0.11638	0.11472	0.07667	0.07667	0.07667	0.07667	0.03452	0.03452	0.03452	0.03452	0.11965	0.11965	0.11965	0.11965	0.9868	0.9644	0.9686	0.0132	0.2087	0.3136	0.0356	0.7913	0.6823	0.0314	0.6864	0.3177	0.16	0.24	TRUE	9.60969
1nc495_090_243	NCU03284.2	1.28335	1	1.18	2.62738	0.52602	0.36067	0.51656	0.91673	0.75548	0.5078	0.79967	0.788	0.28643	0.28643	0.28643	0.28643	0.14313	0.14313	0.14313	0.14313	0.48417	0.48417	0.48417	0.48417	0.8252	0.607	0.0378	0.1748	0.3089	0.0059	0.393	0.6911	0.0277	0.9622	0.9941	0.9723	0.46	0.47	TRUE	1.9488
1nc495_110_1051	1nc495_110	1.71836	1	1.0749	3.10224	0.68259	0.43876	0.39481	1.10392	0.91742	0.73757	0.58245	0.98186	0.32299	0.32299	0.32299	0.32299	0.14554	0.14554	0.14554	0.14554	0.43625	0.43625	0.43625	0.43625	0.9382	0.9376	0.0637	0.0618	0.4174	0.0085	0.0624	0.5826	0.0043	0.9363	0.9915	0.9957	0.46	0.48	TRUE	-1.92767
1nc500_040_776	NCU10507.2a	1.09111	1	1.14025	1.01296	0.17724	0.16114	0.18606	0.16384	0.18636	0.18442	0.19072	0.18771	0.12325	0.12325	0.12325	0.12325	0.05545	0.05545	0.05545	0.05545	0.17319	0.17319	0.17319	0.17319	0.7854	0.3417	0.7319	0.2146	0.1582	0.4493	0.6583	0.8418	0.8497	0.2681	0.5507	0.1503	0.25	0.22	TRUE	5.0948
1nc500_260_430	NCU03322.2	1.84243	1	1.6129	1.05576	0.26799	0.16934	0.24367	0.18404	0.27561	0.19821	0.25157	0.19823	0.12268	0.12268	0.12268	0.12268	0.05442	0.05442	0.05442	0.05442	0.17293	0.17293	0.17293	0.17293	0.9993	0.875	0.9984	0.0007	0.0043	0.2982	0.125	0.9957	0.9949	0.0016	0.7018	0.0051	0.23	0.22	TRUE	5.88258
1nc540_310_570	NCU10517.2b	1.85344	1	2.07975	1.16242	0.128	0.08507	0.13695	0.09895	0.13218	0.09146	0.14202	0.0996	0.055	0.055	0.055	0.055	0.02478	0.02478	0.02478	0.02478	0.08514	0.08514	0.08514	0.08514	1	0.0272	0.9998	0	0	0.0124	0.9728	1	1	0.0002	0.9876	0	0.2	0.42	TRUE	12.7128
1nc540_360_791	NCU08368.2	1.08834	1	1.18969	1.0741	0.25897	0.24407	0.28522	0.27297	0.2917	0.28199	0.31828	0.3282	0.20192	0.20192	0.20192	0.20192	0.08614	0.08614	0.08614	0.08614	0.24774	0.24774	0.24774	0.24774	0.698	0.3034	0.5278	0.302	0.2061	0.3415	0.6966	0.7939	0.7134	0.4722	0.6585	0.2866	0.37	0.33	TRUE	2.79773
1nc540_390_2061	NCU08371.2	2.26388	1	2.53609	1.05399	0.66347	0.35775	0.77656	0.39521	0.7455	0.54241	0.76347	0.57811	0.29595	0.29595	0.29595	0.29595	0.12472	0.12472	0.12472	0.12472	0.32805	0.32805	0.32805	0.32805	0.9923	0.3132	0.9843	0.0077	0.0077	0.424	0.6868	0.9923	0.9933	0.0157	0.576	0.0067	0.43	0.43	TRUE	-0.0520385
1nc540_400_2037	NCU08372.2	1.17145	1	1.16695	1.03388	0.14261	0.13044	0.14207	0.13684	0.15556	0.13751	0.15485	0.13394	0.09365	0.09365	0.09365	0.09365	0.04152	0.04152	0.04152	0.04152	0.13721	0.13721	0.13721	0.13721	0.9522	0.5208	0.8913	0.0478	0.0717	0.3344	0.4792	0.9283	0.9141	0.1087	0.6656	0.0859	0.2	0.17	TRUE	8.42714
1nc540_470_248	NCU08379.2	1.9672	1	2.20362	1.14473	0.42194	0.24842	0.45144	0.29244	0.43885	0.3219	0.47932	0.36718	0.18531	0.18531	0.18531	0.18531	0.0814	0.0814	0.0814	0.0814	0.23844	0.23844	0.23844	0.23844	0.9975	0.239	0.9863	0.0025	0.0026	0.2092	0.761	0.9974	0.9968	0.0137	0.7908	0.0032	0.32	0.3	TRUE	1.22479
1nc542_010_0	1nc542_010	1.54884	1	1.33783	1.06927	0.20701	0.16911	0.17093	0.15348	0.22772	0.17407	0.16495	0.165	0.0878	0.0878	0.0878	0.0878	0.04365	0.04365	0.04365	0.04365	0.19172	0.19172	0.19172	0.19172	0.9932	0.9452	0.9899	0.0068	0.0192	0.1966	0.0548	0.9808	0.9765	0.0101	0.8034	0.0235	0.2	0.18	TRUE	8.50385
1nc542_020_2401	NCU08382.2	1.48041	1	1.20174	1.01736	0.36537	0.27319	0.28662	0.25687	0.3815	0.3405	0.30754	0.30095	0.18008	0.18008	0.18008	0.18008	0.08409	0.08409	0.08409	0.08409	0.2842	0.2842	0.2842	0.2842	0.9516	0.8952	0.9494	0.0484	0.1871	0.4556	0.1048	0.8129	0.8379	0.0506	0.5444	0.1621	0.35	0.32	TRUE	3.77498
1nc542_030_609	NCU08383.2	1.41694	1	1.7866	1.07374	0.28511	0.2289	0.33584	0.22866	0.32698	0.26032	0.34089	0.27153	0.16499	0.16499	0.16499	0.16499	0.07314	0.07314	0.07314	0.07314	0.22025	0.22025	0.22025	0.22025	0.9736	0.0729	0.9352	0.0264	0.0054	0.3023	0.9271	0.9946	0.995	0.0648	0.6977	0.005	0.3	0.28	TRUE	3.00917
1nc542_050_821	NCU08385.2	1.38978	1	1.1812	1.0613	0.23766	0.19712	0.21321	0.1992	0.25107	0.21458	0.23302	0.22034	0.14153	0.14153	0.14153	0.14153	0.06251	0.06251	0.06251	0.06251	0.19949	0.19949	0.19949	0.19949	0.9796	0.8923	0.9509	0.0204	0.1318	0.311	0.1077	0.8682	0.8041	0.0491	0.689	0.1959	0.28	0.24	TRUE	5.02893
1nc549_020_1733	NCU00943.2	5.16173	1	1.5702	5.56416	1.76617	0.41083	0.60638	2.17728	1.96213	0.75088	0.98711	2.13735	0.28407	0.28407	0.28407	0.28407	0.14511	0.14511	0.14511	0.14511	0.46774	0.46774	0.46774	0.46774	0.9996	0.9991	0.4061	0.0004	0.1064	0.0017	0.0009	0.8936	0.0053	0.5939	0.9983	0.9947	0.38	0.47	TRUE	-1.21192
1nc549_030_782	NCU00944.2	1.46474	1	1.33759	1.10597	0.16134	0.11956	0.13914	0.12892	0.16119	0.12947	0.14522	0.13956	0.08215	0.08215	0.08215	0.08215	0.03723	0.03723	0.03723	0.03723	0.12652	0.12652	0.12652	0.12652	0.9978	0.8827	0.9883	0.0022	0.0081	0.10031	0.1173	0.9919	0.9798	0.0117	0.89969	0.0202	0.18	0.15	TRUE	9.15112
1nc550_060_1158	NCU00861.2	1.06947	1	1.14643	1.01922	0.17612	0.17545	0.18474	0.18124	0.19659	0.17977	0.21716	0.19125	0.13032	0.13032	0.13032	0.13032	0.05773	0.05773	0.05773	0.05773	0.18495	0.18495	0.18495	0.18495	0.719	0.2707	0.6508	0.281	0.1591	0.4272	0.7293	0.8409	0.8355	0.3492	0.5728	0.1645	0.26	0.23	TRUE	6.08227
1nc550_070_1324	NCU00862.2	1.08451	1	1.17302	1.06433	0.18179	0.16631	0.19114	0.17077	0.18995	0.18631	0.20391	0.19469	0.12628	0.12628	0.12628	0.12628	0.05584	0.05584	0.05584	0.05584	0.17193	0.17193	0.17193	0.17193	0.7708	0.2303	0.5634	0.2292	0.116	0.2857	0.7697	0.884	0.8061	0.4366	0.7143	0.1939	0.25	0.22	TRUE	6.2763
1nc550_150_1734	NCU00870.2	6.84894	1	7.98531	1.15025	1.69178	0.34324	1.7749	0.40655	1.67797	0.58581	1.75684	0.68205	0.24253	0.24253	0.24253	0.24253	0.10401	0.10401	0.10401	0.10401	0.28939	0.28939	0.28939	0.28939	1	0.225	0.9998	0	0	0.2508	0.775	1	1	0.0002	0.7492	0	0.25	0.37	TRUE	1.06899
1nc550_170_937	NCU00872.2	1.16411	1	1.07978	1.08344	0.31275	0.28724	0.33171	0.35051	0.35796	0.33461	0.4093	0.39207	0.21578	0.21578	0.21578	0.21578	0.10084	0.10084	0.10084	0.10084	0.335	0.335	0.335	0.335	0.7869	0.6587	0.6331	0.2131	0.3709	0.3423	0.3413	0.6291	0.4908	0.3669	0.6577	0.5092	0.4	0.37	TRUE	2.68959
1nc550_300_1254	NCU00885.2	1.02	1	1.01559	1.05436	0.216	0.19659	0.22645	0.20877	0.25326	0.21717	0.25796	0.21025	0.13785	0.13785	0.13785	0.13785	0.06658	0.06658	0.06658	0.06658	0.25403	0.25403	0.25403	0.25403	0.5651	0.5161	0.4157	0.4349	0.4583	0.3319	0.4839	0.5417	0.3823	0.5843	0.6681	0.6177	0.3	0.26	TRUE	5.3849
1nc550_330_691	NCU00888.2a	1.20807	1	1.26001	1.13471	0.27929	0.20524	0.27837	0.24223	0.30894	0.23532	0.30694	0.25156	0.14549	0.14549	0.14549	0.14549	0.06856	0.06856	0.06856	0.06856	0.25339	0.25339	0.25339	0.25339	0.9063	0.3904	0.6585	0.0937	0.0972	0.1879	0.6096	0.9028	0.7809	0.3415	0.8121	0.2191	0.3	0.27	TRUE	5.10161
1nc550_350_1018	NCU00889.2	1.06799	1	1.04896	1.01375	0.22045	0.20717	0.21458	0.2134	0.24085	0.23396	0.24135	0.24249	0.16747	0.16747	0.16747	0.16747	0.07278	0.07278	0.07278	0.07278	0.21582	0.21582	0.21582	0.21582	0.6811	0.5583	0.6257	0.3189	0.3877	0.4621	0.4417	0.6123	0.5963	0.3743	0.5379	0.4037	0.31	0.28	TRUE	4.35059
1nc551_090_738	NCU00941.2	1.16604	1	1.48381	1.0952	0.22856	0.2074	0.31334	0.25646	0.2467	0.23537	0.31849	0.28684	0.14247	0.14247	0.14247	0.14247	0.06894	0.06894	0.06894	0.06894	0.24009	0.24009	0.24009	0.24009	0.8733	0.0544	0.6622	0.1267	0.0278	0.2436	0.9456	0.9722	0.9492	0.3378	0.7564	0.0508	0.29	0.27	TRUE	4.60773
1nc551_100_908	NCU00942.2	1.0567	1	1.10219	1.03825	0.24425	0.2416	0.25603	0.25237	0.28754	0.28565	0.31641	0.29147	0.19597	0.19597	0.19597	0.19597	0.08403	0.08403	0.08403	0.08403	0.23781	0.23781	0.23781	0.23781	0.6367	0.4005	0.5409	0.3633	0.3153	0.4182	0.5995	0.6847	0.6296	0.4591	0.5818	0.3704	0.36	0.32	TRUE	3.12167
1nc555_040_1249	NCU00841.2	1.11705	1	1.16291	1.02284	0.16304	0.15768	0.17485	0.16227	0.17938	0.1668	0.18463	0.16087	0.11324	0.11324	0.11324	0.11324	0.05002	0.05002	0.05002	0.05002	0.16975	0.16975	0.16975	0.16975	0.8566	0.3404	0.7792	0.1434	0.1093	0.4115	0.6596	0.8907	0.8837	0.2208	0.5885	0.1163	0.23	0.2	TRUE	7.32367
1nc555_140_872	NCU00852.2	1.1756	1	1.11326	1.08192	0.49116	0.42773	0.57691	0.65529	0.48229	0.52001	0.71838	0.9598	0.2803	0.2803	0.2803	0.2803	0.16028	0.16028	0.16028	0.16028	0.61231	0.61231	0.61231	0.61231	0.7249	0.5951	0.5873	0.2751	0.3888	0.421	0.4049	0.6112	0.5315	0.4127	0.579	0.4685	0.3	0.49	TRUE	1.66294
1nc559_010_822	NCU00834.2	1.88559	1	1.65197	1.08758	0.79716	0.47287	0.88814	0.68385	0.77718	0.7168	0.92545	1.36388	0.34699	0.34699	0.34699	0.34699	0.18691	0.18691	0.18691	0.18691	0.68527	0.68527	0.68527	0.68527	0.9428	0.6914	0.8346	0.0572	0.1564	0.4355	0.3086	0.8436	0.7493	0.1654	0.5645	0.2507	0.22	0.18	TRUE	0.0999275
1nc560_040_595	NCU00830.2	1.27171	1	1.44477	1.06946	0.11743	0.09664	0.12215	0.09802	0.11711	0.09776	0.12299	0.10689	0.06671	0.06671	0.06671	0.06671	0.02996	0.02996	0.02996	0.02996	0.09831	0.09831	0.09831	0.09831	0.9953	0.0331	0.9759	0.0047	0.0007	0.1314	0.9669	0.9993	0.998	0.0241	0.8686	0.002	0.22	0.39	TRUE	10.7929
1nc560_060_460	NCU00828.2	2.72974	1	6.09601	1.15684	1.05262	0.46143	1.96934	0.50171	1.75118	0.89612	1.34531	0.81528	0.36218	0.36218	0.36218	0.36218	0.14964	0.14964	0.14964	0.14964	0.4117	0.4117	0.4117	0.4117	0.986	0.0283	0.9776	0.014	0.0009	0.3529	0.9717	0.9991	0.9998	0.0224	0.6471	0.0002	0.4	0.49	TRUE	-3.85519
1nc560_130_1443	NCU00822.2	1.14993	1	1.15311	1.03576	0.15618	0.14001	0.16445	0.15329	0.16253	0.15212	0.16833	0.15688	0.10196	0.10196	0.10196	0.10196	0.04519	0.04519	0.04519	0.04519	0.16296	0.16296	0.16296	0.16296	0.9205	0.4814	0.8354	0.0795	0.1038	0.3472	0.5186	0.8962	0.8676	0.1646	0.6528	0.1324	0.21	0.19	TRUE	7.91077
1nc560_180_13	NCU00815.2	1.75226	1	1.45501	1.34571	0.20714	0.136	0.21087	0.20409	0.21281	0.14552	0.21733	0.21092	0.08667	0.08667	0.08667	0.08667	0.04274	0.04274	0.04274	0.04274	0.16614	0.16614	0.16614	0.16614	0.9996	0.9665	0.9804	0.0004	0.0081	0.0095	0.0335	0.9919	0.7935	0.0196	0.9905	0.2065	0.2	0.18	TRUE	7.9993
1nc560_190_1203	NCU00814.2	1.96954	1	1.24896	1.08645	0.47701	0.27703	0.31166	0.28217	0.43238	0.35155	0.36086	0.36294	0.21135	0.21135	0.21135	0.21135	0.09145	0.09145	0.09145	0.09145	0.26672	0.26672	0.26672	0.26672	0.9941	0.9792	0.9854	0.0059	0.1616	0.3229	0.0208	0.8384	0.777	0.0146	0.6771	0.223	0.36	0.34	TRUE	2.00605
1nc560_210_727	NCU00812.2	1.02691	1	1.00544	1.04033	0.22607	0.22052	0.24542	0.24856	0.24444	0.24222	0.27904	0.27862	0.16108	0.16108	0.16108	0.16108	0.07748	0.07748	0.07748	0.07748	0.27022	0.27022	0.27022	0.27022	0.5727	0.5542	0.4716	0.4273	0.4874	0.3971	0.4458	0.5126	0.4156	0.5284	0.6029	0.5844	0.33	0.29	TRUE	4.69167
1nc560_230_2829	NCU00810.2	1.45273	1	1.55686	1.18766	0.29896	0.2369	0.31919	0.28421	0.31274	0.3006	0.31583	0.33347	0.15271	0.15271	0.15271	0.15271	0.07199	0.07199	0.07199	0.07199	0.26573	0.26573	0.26573	0.26573	0.9793	0.2986	0.8715	0.0207	0.0253	0.1621	0.7014	0.9747	0.9455	0.1285	0.8379	0.0545	0.32	0.29	TRUE	4.99384
1nc560_240_1284	NCU00809.2	2.09922	1	2.54324	1.01891	0.73821	0.46958	0.89608	0.52829	0.67973	0.74042	0.70835	1.18359	0.22019	0.22019	0.22019	0.22019	0.13168	0.13168	0.13168	0.13168	0.52366	0.52366	0.52366	0.52366	0.9843	0.1908	0.9347	0.0157	0.0185	0.4832	0.8092	0.9815	0.9682	0.0653	0.5168	0.0318	0.44	0.43	TRUE	4.1174
1nc562_080_790	NCU00797.2	1.1936	1	1.19133	1.08128	0.0828	0.06837	0.0855	0.07498	0.08357	0.07787	0.08072	0.07959	0.05003	0.05003	0.05003	0.05003	0.02249	0.02249	0.02249	0.02249	0.08294	0.08294	0.08294	0.08294	0.9943	0.5129	0.9535	0.0057	0.0103	0.0592	0.4871	0.9897	0.9627	0.0465	0.9408	0.0373	0.28	0.29	TRUE	13.4269
1nc562_110_1698	NCU00800.2	1.16992	1	1.16246	1.02504	0.16507	0.14413	0.16043	0.15059	0.17599	0.15801	0.16829	0.15066	0.10477	0.10477	0.10477	0.10477	0.04615	0.04615	0.04615	0.04615	0.15739	0.15739	0.15739	0.15739	0.9297	0.5303	0.8796	0.0703	0.0947	0.3914	0.4697	0.9053	0.9036	0.1204	0.6086	0.0964	0.22	0.19	TRUE	7.44265
1nc564_010_186	1nc564_010	1.15126	1	1.0754	1.02766	0.22127	0.20172	0.2055	0.21423	0.24946	0.22767	0.23022	0.23011	0.15901	0.15901	0.15901	0.15901	0.06978	0.06978	0.06978	0.06978	0.21825	0.21825	0.21825	0.21825	0.8307	0.6966	0.7568	0.1693	0.3246	0.4122	0.3034	0.6754	0.6374	0.2432	0.5878	0.3626	0.31	0.27	TRUE	4.63527
1nc564_050_1169	NCU00754.2	1.56949	1	1.33076	1.05425	0.24829	0.16858	0.21445	0.18102	0.2453	0.19667	0.22325	0.20773	0.12464	0.12464	0.12464	0.12464	0.05543	0.05543	0.05543	0.05543	0.18537	0.18537	0.18537	0.18537	0.995	0.9148	0.9889	0.005	0.0309	0.3021	0.0852	0.9691	0.9624	0.0111	0.6979	0.0376	0.25	0.22	TRUE	5.18096
1nc564_080_300	NCU00757.2	1.31853	1	1.78931	1.06382	0.2246	0.19182	0.27859	0.18786	0.24711	0.21965	0.27974	0.23556	0.13576	0.13576	0.13576	0.13576	0.05987	0.05987	0.05987	0.05987	0.18191	0.18191	0.18191	0.18191	0.9704	0.0205	0.9207	0.0296	0.002	0.2979	0.9795	0.998	0.9976	0.0793	0.7021	0.0024	0.26	0.24	TRUE	5.31121
1nc570_020_1220	NCU00699.2	1.29596	1	1.14385	1.05325	0.50235	0.39804	0.6523	0.53789	0.50355	0.438	0.90953	0.70642	0.25531	0.25531	0.25531	0.25531	0.1459	0.1459	0.1459	0.1459	0.56626	0.56626	0.56626	0.56626	0.854	0.6631	0.7418	0.146	0.3699	0.4215	0.3369	0.6301	0.5726	0.2582	0.5785	0.4274	0.49	0.47	TRUE	2.50254
1nc570_100_2209	NCU00709.2	1.29004	1	1.24176	1.0762	0.18184	0.14643	0.16948	0.15919	0.18877	0.1612	0.18615	0.17027	0.11036	0.11036	0.11036	0.11036	0.04859	0.04859	0.04859	0.04859	0.16357	0.16357	0.16357	0.16357	0.9814	0.666	0.9315	0.0186	0.0445	0.2192	0.334	0.9555	0.918	0.0685	0.7808	0.082	0.22	0.2	TRUE	6.63084
1nc570_110_641	NCU00710.2	1.56418	1	9.46139	1.36195	0.56677	0.45386	2.35817	0.61951	1.17769	1.43041	0.97151	1.0915	0.24961	0.24961	0.24961	0.24961	0.13097	0.13097	0.13097	0.13097	0.46234	0.46234	0.46234	0.46234	0.9204	0.0005	0.6564	0.0796	0.0013	0.2469	0.9995	0.9987	1	0.3436	0.7531	0	0.3	0.43	TRUE	2.36661
1nc570_120_1132	NCU00711.2	1.01647	1	1.20841	1.03761	0.19859	0.19114	0.23393	0.20019	0.21707	0.23546	0.23579	0.22315	0.15461	0.15461	0.15461	0.15461	0.06869	0.06869	0.06869	0.06869	0.19824	0.19824	0.19824	0.19824	0.5471	0.1124	0.4453	0.4529	0.1292	0.3921	0.8876	0.8708	0.8553	0.5547	0.6079	0.1447	0.3	0.27	TRUE	3.65529
1nc570_140_593	NCU00713.2	1.09122	1	1.08324	1.11006	0.189	0.16368	0.18214	0.17594	0.18703	0.18258	0.18644	0.20037	0.12608	0.12608	0.12608	0.12608	0.05479	0.05479	0.05479	0.05479	0.17941	0.17941	0.17941	0.17941	0.7726	0.5251	0.4483	0.2274	0.2677	0.1833	0.4749	0.7323	0.4085	0.5517	0.8167	0.5915	0.26	0.23	TRUE	6.46306
1nc570_200_236	NCU00718.2	1.11123	1	1.19676	1.0456	0.18167	0.16477	0.18698	0.17139	0.1947	0.18374	0.1985	0.19406	0.12671	0.12671	0.12671	0.12671	0.05699	0.05699	0.05699	0.05699	0.17728	0.17728	0.17728	0.17728	0.8302	0.2475	0.6921	0.1698	0.0965	0.3371	0.7525	0.9035	0.8739	0.3079	0.6629	0.1261	0.25	0.23	TRUE	6.436
1nc570_230_831	NCU00720.2	1.74458	1	1.34828	1.86817	0.37801	0.23653	0.2956	0.41186	0.42461	0.29251	0.34946	0.41746	0.1812	0.1812	0.1812	0.1812	0.07886	0.07886	0.07886	0.07886	0.23427	0.23427	0.23427	0.23427	0.9952	0.9319	0.3548	0.0048	0.0726	0.0035	0.0681	0.9274	0.0405	0.6452	0.9965	0.9595	0.32	0.3	TRUE	3.4598
1nc570_250_1540	NCU00722.2	1.28993	1	1.34622	1.41497	0.46716	0.37472	0.53426	0.55557	0.53715	0.49456	0.63688	0.72896	0.31794	0.31794	0.31794	0.31794	0.14252	0.14252	0.14252	0.14252	0.40722	0.40722	0.40722	0.40722	0.8224	0.4474	0.3951	0.1776	0.2038	0.1357	0.5526	0.7962	0.4436	0.6049	0.8643	0.5564	0.4	0.47	TRUE	-0.302605
1nc570_260_455	1nc570_260	1.0409	1	1.1807	1.13219	0.21571	0.21841	0.24667	0.23553	0.25159	0.25293	0.25092	0.26727	0.16758	0.16758	0.16758	0.16758	0.07266	0.07266	0.07266	0.07266	0.2251	0.2251	0.2251	0.2251	0.6105	0.2006	0.3103	0.3895	0.1694	0.2027	0.7994	0.8306	0.6112	0.6897	0.7973	0.3888	0.32	0.28	TRUE	4.12297
1nc570_300_1424	NCU00725.2	1.37376	1	1.01567	1.05084	0.34472	0.26215	0.28328	0.29687	0.35524	0.31913	0.32823	0.35087	0.22563	0.22563	0.22563	0.22563	0.09584	0.09584	0.09584	0.09584	0.2635	0.2635	0.2635	0.2635	0.9283	0.922	0.8651	0.0717	0.4689	0.4034	0.078	0.5311	0.435	0.1349	0.5966	0.565	0.4	0.36	TRUE	1.93818
1nc570_350_2316	NCU00730.2	1.16214	1	1.26964	1.14929	0.3144	0.2761	0.33602	0.32383	0.36017	0.34295	0.3995	0.37246	0.23253	0.23253	0.23253	0.23253	0.09852	0.09852	0.09852	0.09852	0.27624	0.27624	0.27624	0.27624	0.7769	0.3223	0.517	0.2231	0.1587	0.2492	0.6777	0.8413	0.6861	0.483	0.7508	0.3139	0.41	0.37	TRUE	1.96578
1nc580_070_428	NCU00617.2	1.13376	1	1.1149	1.04827	0.2584	0.19884	0.23743	0.20952	0.27474	0.20991	0.27628	0.23314	0.14263	0.14263	0.14263	0.14263	0.06867	0.06867	0.06867	0.06867	0.2414	0.2414	0.2414	0.2414	0.8267	0.538	0.6898	0.1733	0.2423	0.354	0.462	0.7577	0.6857	0.3102	0.646	0.3143	0.3	0.27	TRUE	5.44308
1nc580_110_4162	NCU00621.2	1.06888	1	1.11189	1.04578	0.19509	0.18368	0.19413	0.18321	0.20048	0.19481	0.21706	0.21841	0.13638	0.13638	0.13638	0.13638	0.0605	0.0605	0.0605	0.0605	0.18402	0.18402	0.18402	0.18402	0.72	0.3678	0.5638	0.28	0.2212	0.351	0.6322	0.7788	0.6982	0.4362	0.649	0.3018	0.27	0.24	TRUE	5.86932
1nc580_160_7380	NCU00625.2b	1.21836	1	1.16575	1.04875	0.22663	0.19664	0.21932	0.19971	0.24909	0.21961	0.2357	0.23331	0.14819	0.14819	0.14819	0.14819	0.06486	0.06486	0.06486	0.06486	0.20262	0.20262	0.20262	0.20262	0.922	0.6357	0.8344	0.078	0.1582	0.3565	0.3643	0.8418	0.7856	0.1656	0.6435	0.2144	0.29	0.26	TRUE	5.267
1nc580_370_1548	NCU00648.2	1.07835	1	1.12299	1.07553	0.29513	0.28018	0.31665	0.30879	0.34557	0.34657	0.36468	0.37157	0.23966	0.23966	0.23966	0.23966	0.10044	0.10044	0.10044	0.10044	0.28066	0.28066	0.28066	0.28066	0.6442	0.4202	0.5007	0.3558	0.3145	0.3649	0.5798	0.6855	0.5826	0.4993	0.6351	0.4174	0.42	0.37	TRUE	1.67113
1nc580_450_2404	NCU00656.2	1.14512	1	1.09042	1.04783	0.21021	0.18535	0.20947	0.20174	0.23511	0.20833	0.22164	0.20817	0.14531	0.14531	0.14531	0.14531	0.06351	0.06351	0.06351	0.06351	0.20361	0.20361	0.20361	0.20361	0.8563	0.6633	0.7319	0.1437	0.2753	0.3531	0.3367	0.7247	0.6174	0.2681	0.6469	0.3826	0.29	0.26	TRUE	5.31328
1nc580_490_1222	NCU00660.2	1.2033	1	1.30154	1.15557	0.24313	0.21164	0.26569	0.24221	0.27125	0.24026	0.28436	0.26871	0.15996	0.15996	0.15996	0.15996	0.07026	0.07026	0.07026	0.07026	0.22111	0.22111	0.22111	0.22111	0.8921	0.2876	0.6036	0.1079	0.076	0.1539	0.7124	0.924	0.7958	0.3964	0.8461	0.2042	0.31	0.28	TRUE	4.7255
1nc580_660_1505	NCU10176.2a	1.21414	1	1.34136	1.02275	0.1847	0.16302	0.21182	0.17903	0.19	0.17771	0.23297	0.20407	0.10475	0.10475	0.10475	0.10475	0.05259	0.05259	0.05259	0.05259	0.19105	0.19105	0.19105	0.19105	0.9504	0.1548	0.9036	0.0496	0.0268	0.4013	0.8452	0.9732	0.9662	0.0964	0.5987	0.0338	0.23	0.21	TRUE	8.03679
1nc580_670_2076	NCU10176.2b	1.1237	1	1.1127	1.06388	0.2015	0.18136	0.19761	0.19691	0.22231	0.20367	0.2138	0.21976	0.14338	0.14338	0.14338	0.14338	0.06237	0.06237	0.06237	0.06237	0.18912	0.18912	0.18912	0.18912	0.8297	0.5358	0.6495	0.1703	0.223	0.3135	0.4642	0.777	0.6431	0.3505	0.6865	0.3569	0.28	0.25	TRUE	5.48471
1nc580_690_3473	NCU00681.2	1.06579	1	1.0745	1.06343	0.22589	0.21837	0.23817	0.2235	0.24689	0.2496	0.25349	0.26575	0.16774	0.16774	0.16774	0.16774	0.07342	0.07342	0.07342	0.07342	0.22264	0.22264	0.22264	0.22264	0.675	0.4734	0.5058	0.325	0.3335	0.3359	0.5266	0.6665	0.5239	0.4942	0.6641	0.4761	0.32	0.28	TRUE	4.34931
1nc580_710_1209	NCU00684.2	1.01211	1	1.05858	1.02824	0.17163	0.17066	0.18058	0.172	0.17832	0.18058	0.193	0.18886	0.13146	0.13146	0.13146	0.13146	0.05722	0.05722	0.05722	0.05722	0.18557	0.18557	0.18557	0.18557	0.5495	0.3386	0.4574	0.4505	0.3283	0.4013	0.6614	0.6717	0.6028	0.5426	0.5987	0.3972	0.26	0.23	TRUE	5.79408
1nc580_740_234	NCU00688.2	1.13702	1	1.29818	1.12731	0.21181	0.19481	0.23591	0.21366	0.22701	0.23001	0.24673	0.23478	0.14625	0.14625	0.14625	0.14625	0.06425	0.06425	0.06425	0.06425	0.20192	0.20192	0.20192	0.20192	0.8402	0.1597	0.5242	0.1598	0.0604	0.1825	0.8403	0.9396	0.8614	0.4758	0.8175	0.1386	0.29	0.25	TRUE	5.30147
1nc580_810_1529	NCU00695.2	1.50034	1	1.05313	1.08655	0.28474	0.22466	0.22149	0.2444	0.30098	0.24487	0.27235	0.26259	0.1691	0.1691	0.1691	0.1691	0.07477	0.07477	0.07477	0.07477	0.22131	0.22131	0.22131	0.22131	0.9864	0.9751	0.9539	0.0136	0.3772	0.2808	0.0249	0.6228	0.4134	0.0461	0.7192	0.5866	0.31	0.29	TRUE	4.15276
1nc592_020_169	NCU10916.2a	1.06883	1	1.09806	1.04852	0.23061	0.2162	0.2392	0.234	0.24107	0.2474	0.26064	0.25376	0.16837	0.16837	0.16837	0.16837	0.07226	0.07226	0.07226	0.07226	0.22853	0.22853	0.22853	0.22853	0.6768	0.4259	0.5443	0.3232	0.2884	0.3664	0.5741	0.7116	0.6174	0.4557	0.6336	0.3826	0.32	0.29	TRUE	4.20028
1nc594_140_190	NCU00541.2a	1.00712	1	1.04767	1.22121	0.14003	0.13366	0.14013	0.15575	0.14786	0.14419	0.15064	0.16201	0.09673	0.09673	0.09673	0.09673	0.04406	0.04406	0.04406	0.04406	0.14976	0.14976	0.14976	0.14976	0.5362	0.3079	0.0496	0.4638	0.3019	0.0275	0.6921	0.6981	0.0626	0.9504	0.9725	0.9374	0.2	0.18	TRUE	7.84543
1nc596_030_235	NCU00521.2	1.29525	1	1.24061	1.07885	0.4637	0.27032	0.47257	0.30155	0.5797	0.30632	0.53453	0.32747	0.17774	0.17774	0.17774	0.17774	0.09525	0.09525	0.09525	0.09525	0.34603	0.34603	0.34603	0.34603	0.9076	0.5607	0.7718	0.0924	0.1996	0.3258	0.4393	0.8004	0.7737	0.2282	0.6742	0.2263	0.37	0.34	TRUE	4.1895
1nc600_060_67	NCU00504.2	1.26756	1	1.0807	1.11986	0.31635	0.27215	0.28051	0.29854	0.36104	0.33528	0.33027	0.35623	0.2222	0.2222	0.2222	0.2222	0.09666	0.09666	0.09666	0.09666	0.25949	0.25949	0.25949	0.25949	0.8786	0.7917	0.7161	0.1214	0.3629	0.2803	0.2083	0.6371	0.4238	0.2839	0.7197	0.5762	0.39	0.35	TRUE	-0.914281
1nc700_060_3477	NCU02770.2	1.08485	1	1.08703	1.0214	0.25979	0.23738	0.2615	0.24474	0.28449	0.27407	0.29075	0.29407	0.195	0.195	0.195	0.195	0.08503	0.08503	0.08503	0.08503	0.24334	0.24334	0.24334	0.24334	0.687	0.4964	0.6283	0.313	0.3331	0.4505	0.5036	0.6669	0.6349	0.3717	0.5495	0.3651	0.36	0.32	TRUE	3.28864
1nc700_080_1093	NCU02772.2	1.05432	1	1.12172	1.09958	0.18056	0.17693	0.19458	0.18701	0.18785	0.19109	0.20382	0.20399	0.13539	0.13539	0.13539	0.13539	0.05966	0.05966	0.05966	0.05966	0.18031	0.18031	0.18031	0.18031	0.6809	0.3003	0.3772	0.3191	0.206	0.2144	0.6997	0.794	0.573	0.6228	0.7856	0.427	0.27	0.24	TRUE	5.83983
1nc700_170_1027	NCU02781.2	1.03361	1	1.09867	1.09385	0.14611	0.14318	0.15529	0.15193	0.15922	0.15291	0.16261	0.16835	0.10501	0.10501	0.10501	0.10501	0.04749	0.04749	0.04749	0.04749	0.15539	0.15539	0.15539	0.15539	0.6517	0.2517	0.2922	0.3483	0.1909	0.1704	0.7483	0.8091	0.521	0.7078	0.8296	0.479	0.22	0.19	TRUE	7.72288
1nc710_030_183	NCU02786.2	1.18263	1	1.4007	1.13469	0.1025	0.09495	0.11442	0.10569	0.10896	0.1022	0.12189	0.10302	0.06606	0.06606	0.06606	0.06606	0.02965	0.02965	0.02965	0.02965	0.10046	0.10046	0.10046	0.10046	0.9859	0.0141	0.7366	0.0141	0.0011	0.0348	0.9859	0.9989	0.9936	0.2634	0.9652	0.0064	0.24	0.38	TRUE	10.7843
1nc710_070_2122	NCU02790.2	1.07698	1	1.09349	1.07495	0.14771	0.13805	0.14801	0.14315	0.15671	0.14989	0.15279	0.15844	0.10406	0.10406	0.10406	0.10406	0.04596	0.04596	0.04596	0.04596	0.14374	0.14374	0.14374	0.14374	0.7869	0.429	0.5068	0.2131	0.2	0.2156	0.571	0.8	0.5749	0.4932	0.7844	0.4251	0.22	0.19	TRUE	7.5902
1nc710_080_3233	NCU02791.2	1.09588	1	1.27771	1.1199	0.19059	0.18576	0.21761	0.20263	0.21257	0.20308	0.23799	0.22095	0.13546	0.13546	0.13546	0.13546	0.05965	0.05965	0.05965	0.05965	0.18849	0.18849	0.18849	0.18849	0.7864	0.1122	0.436	0.2136	0.0543	0.1756	0.8878	0.9457	0.8495	0.564	0.8244	0.1505	0.27	0.24	TRUE	5.79061
1nc720_070_524	NCU02812.2	1.08302	1	1.05042	1.0728	0.18828	0.18073	0.18541	0.19385	0.19797	0.19122	0.1923	0.2084	0.1346	0.1346	0.1346	0.1346	0.06101	0.06101	0.06101	0.06101	0.18634	0.18634	0.18634	0.18634	0.7457	0.6033	0.5249	0.2543	0.3537	0.2767	0.3967	0.6463	0.4252	0.4751	0.7233	0.5748	0.27	0.24	TRUE	6.19678
1nc720_200_841	NCU02799.2	1.28587	1	1.44259	1.03641	0.53198	0.45658	0.59243	0.46946	0.58127	0.64258	0.58616	0.76014	0.2762	0.2762	0.2762	0.2762	0.15891	0.15891	0.15891	0.15891	0.63648	0.63648	0.63648	0.63648	0.7756	0.3166	0.7266	0.2244	0.1588	0.4362	0.6834	0.8412	0.8314	0.2734	0.5638	0.1686	0.2	0.49	TRUE	0.269236
1nc720_260_557	1nc720_260	1.82836	1	1.35645	1.17874	0.49634	0.29001	0.5004	0.45072	0.4355	0.34334	0.56491	0.65006	0.1786	0.1786	0.1786	0.1786	0.0941	0.0941	0.0941	0.0941	0.36399	0.36399	0.36399	0.36399	0.9848	0.9289	0.9279	0.0152	0.1378	0.1868	0.0711	0.8622	0.6755	0.0721	0.8132	0.3245	0.37	0.35	TRUE	3.50207
1nc725_030_83	NCU02825.2	1.00837	1	1.04772	1.01772	0.11588	0.11552	0.13045	0.11705	0.1238	0.12767	0.12227	0.13166	0.0868	0.0868	0.0868	0.0868	0.03891	0.03891	0.03891	0.03891	0.13173	0.13173	0.13173	0.13173	0.5412	0.3082	0.4571	0.4588	0.302	0.4066	0.6918	0.698	0.6444	0.5429	0.5934	0.3556	0.19	0.16	TRUE	9.24092
1nc725_040_3048	NCU02826.2	1.16282	1	1.22301	1.00909	0.23425	0.20964	0.24921	0.21839	0.25804	0.25304	0.27326	0.24872	0.1719	0.1719	0.1719	0.1719	0.07633	0.07633	0.07633	0.07633	0.21827	0.21827	0.21827	0.21827	0.8405	0.3664	0.7937	0.1595	0.1359	0.4775	0.6336	0.8641	0.8823	0.2063	0.5225	0.1177	0.33	0.29	TRUE	2.31448
1nc725_060_439	NCU02829.2	1.11377	1	1.03863	1.0832	0.1087	0.0999	0.10343	0.10794	0.11842	0.10541	0.10543	0.11283	0.07233	0.07233	0.07233	0.07233	0.03264	0.03264	0.03264	0.03264	0.12116	0.12116	0.12116	0.12116	0.9346	0.8582	0.6515	0.0654	0.2945	0.1178	0.1418	0.7055	0.2501	0.3485	0.8822	0.7499	0.16	0.47	TRUE	10.4284
1nc725_100_108	1nc725_100	1.31285	1	1.27191	1.07131	0.15829	0.12675	0.13105	0.12062	0.1573	0.14292	0.14133	0.12233	0.07176	0.07176	0.07176	0.07176	0.03604	0.03604	0.03604	0.03604	0.14947	0.14947	0.14947	0.14947	0.9864	0.6875	0.9735	0.0136	0.019	0.1551	0.3125	0.981	0.9738	0.0265	0.8449	0.0262	0.17	0.15	TRUE	9.36271
1nc730_050_1032	NCU02878.2	1.18311	1	1.38468	1.11167	0.22905	0.20028	0.25227	0.20348	0.24046	0.22684	0.25443	0.24154	0.14847	0.14847	0.14847	0.14847	0.06629	0.06629	0.06629	0.06629	0.20286	0.20286	0.20286	0.20286	0.8853	0.1166	0.6629	0.1147	0.0366	0.2092	0.8834	0.9634	0.9311	0.3371	0.7908	0.0689	0.29	0.26	TRUE	5.35633
1nc730_140_177	NCU02887.2	1.9319	1	1.21793	1.94049	0.36972	0.19575	0.23517	0.36714	0.37419	0.24449	0.26959	0.38453	0.15078	0.15078	0.15078	0.15078	0.06654	0.06654	0.06654	0.06654	0.2002	0.2002	0.2002	0.2002	0.9985	0.9934	0.4906	0.0015	0.1107	0.0014	0.0066	0.8893	0.006	0.5094	0.9986	0.994	0.28	0.26	TRUE	4.61468
1nc730_250_2791	NCU02896.2	1.63897	1	1.30763	1.24402	0.10321	0.06406	0.08987	0.07517	0.10498	0.06609	0.09348	0.08138	0.03756	0.03756	0.03756	0.03756	0.01857	0.01857	0.01857	0.01857	0.08714	0.08714	0.08714	0.08714	1	0.9961	0.9981	0	0.003	0.0024	0.0039	0.997	0.9042	0.0019	0.9976	0.0958	0.17	0.39	TRUE	14.6803
1nc730_300_328	NCU02901.2	1.12535	1	1.20468	1.05214	0.24902	0.2285	0.26968	0.24633	0.27109	0.27109	0.29007	0.28417	0.18148	0.18148	0.18148	0.18148	0.07998	0.07998	0.07998	0.07998	0.23014	0.23014	0.23014	0.23014	0.77	0.3249	0.6463	0.23	0.1649	0.3744	0.6751	0.8351	0.7951	0.3537	0.6256	0.2049	0.34	0.3	TRUE	3.84061
1nc730_380_148	NCU02909.2a	1.07823	1	1.20108	1.23729	0.14395	0.14227	0.16192	0.16442	0.15915	0.15076	0.16453	0.17137	0.09932	0.09932	0.09932	0.09932	0.04465	0.04465	0.04465	0.04465	0.14195	0.14195	0.14195	0.14195	0.8048	0.1253	0.0993	0.1952	0.0615	0.0273	0.8747	0.9385	0.3651	0.9007	0.9727	0.6349	0.21	0.19	TRUE	8.13104
1nc730_450_1875	NCU02915.2	1.41743	1	1.19976	1.03551	0.17238	0.13348	0.15209	0.13814	0.17399	0.14624	0.15705	0.15375	0.09687	0.09687	0.09687	0.09687	0.04264	0.04264	0.04264	0.04264	0.14186	0.14186	0.14186	0.14186	0.9969	0.9599	0.9896	0.0031	0.0528	0.3221	0.0401	0.9472	0.9393	0.0104	0.6779	0.0607	0.2	0.18	TRUE	8.15121
1nc730_460_405	NCU02916.2	6.9934	1	14.2757	1.08558	2.07695	0.36912	2.65391	0.3931	2.30889	0.67088	2.23859	0.69592	0.24599	0.24599	0.24599	0.24599	0.10608	0.10608	0.10608	0.10608	0.29301	0.29301	0.29301	0.29301	1	0.0044	1	0	0	0.3355	0.9956	1	1	0	0.6645	0	0.21	0.38	TRUE	0.575045
1nc730_540_248	NCU02924.2	1.51042	1	1.37754	1.09953	0.19488	0.14906	0.1859	0.15987	0.20074	0.15706	0.19432	0.17185	0.10503	0.10503	0.10503	0.10503	0.04676	0.04676	0.04676	0.04676	0.15114	0.15114	0.15114	0.15114	0.9969	0.8393	0.9868	0.0031	0.013	0.1625	0.1607	0.987	0.9766	0.0132	0.8375	0.0234	0.22	0.19	TRUE	6.90801
1nc730_610_1031	NCU02931.2	1.23074	1	1.66425	1.02662	0.50907	0.37901	0.66213	0.39138	0.62112	0.53796	0.65083	0.54155	0.23276	0.23276	0.23276	0.23276	0.13809	0.13809	0.13809	0.13809	0.57673	0.57673	0.57673	0.57673	0.7761	0.1439	0.7307	0.2239	0.076	0.4388	0.8561	0.924	0.924	0.2693	0.5612	0.076	0.45	0.45	TRUE	2.36194
1nc730_630_2755	NCU02934.2	1.32472	1	1.21148	1.28489	0.22298	0.18736	0.20917	0.23363	0.2453	0.20633	0.22802	0.23651	0.1392	0.1392	0.1392	0.1392	0.06119	0.06119	0.06119	0.06119	0.18898	0.18898	0.18898	0.18898	0.9749	0.7697	0.5905	0.0251	0.0945	0.0413	0.2303	0.9055	0.3035	0.4095	0.9587	0.6965	0.28	0.25	TRUE	4.668
1nc730_650_1498	NCU02936.2	1.02811	1	1.06926	1.02496	0.17632	0.17458	0.17168	0.17402	0.18043	0.18095	0.18835	0.18804	0.12796	0.12796	0.12796	0.12796	0.05619	0.05619	0.05619	0.05619	0.17493	0.17493	0.17493	0.17493	0.5991	0.3543	0.5065	0.4009	0.2991	0.4116	0.6457	0.7009	0.6532	0.4935	0.5884	0.3468	0.26	0.23	TRUE	6.26322
1nc735_030_798	NCU03046.2a	1.60926	1	1.03891	1.0523	0.2753	0.20808	0.20066	0.23924	0.24317	0.2238	0.23831	0.30456	0.10495	0.10495	0.10495	0.10495	0.05719	0.05719	0.05719	0.05719	0.28562	0.28562	0.28562	0.28562	0.9938	0.9905	0.9767	0.0062	0.372	0.3299	0.0095	0.628	0.4601	0.0233	0.6701	0.5399	0.26	0.23	TRUE	7.32785
1nc735_040_329	NCU03046.2b	1.21367	1	1.2895	1.04232	0.2791	0.25668	0.29847	0.25569	0.32413	0.30175	0.32151	0.29227	0.19657	0.19657	0.19657	0.19657	0.08442	0.08442	0.08442	0.08442	0.25161	0.25161	0.25161	0.25161	0.8546	0.3471	0.7782	0.1454	0.1134	0.405	0.6529	0.8866	0.8864	0.2218	0.595	0.1136	0.36	0.32	TRUE	3.20392
1nc735_050_490	NCU03046.2c	1.08231	1	1.12418	1.1208	0.16572	0.14955	0.17793	0.16001	0.17531	0.17268	0.18207	0.18484	0.11635	0.11635	0.11635	0.11635	0.05212	0.05212	0.05212	0.05212	0.16477	0.16477	0.16477	0.16477	0.7858	0.3476	0.3712	0.2142	0.1623	0.1345	0.6524	0.8377	0.5139	0.6288	0.8655	0.4861	0.24	0.21	TRUE	6.99952
1nc735_080_1557	NCU03049.2	1.27179	1	1.11345	1.51084	0.26683	0.20811	0.29936	0.50586	0.26451	0.2231	0.38126	0.48958	0.08025	0.08025	0.08025	0.08025	0.05169	0.05169	0.05169	0.05169	0.35591	0.35591	0.35591	0.35591	0.9646	0.8964	0.1469	0.0354	0.1788	0.0322	0.1036	0.8212	0.0894	0.8531	0.9678	0.9106	0.24	0.22	TRUE	9.48362
1nc796_030_2997	NCU08600.2	1.262	1	1.11343	1.04783	0.16798	0.1504	0.15129	0.15154	0.17875	0.15473	0.16918	0.16778	0.10711	0.10711	0.10711	0.10711	0.04817	0.04817	0.04817	0.04817	0.15883	0.15883	0.15883	0.15883	0.9795	0.8954	0.9361	0.0205	0.1654	0.3089	0.1046	0.8346	0.7459	0.0639	0.6911	0.2541	0.22	0.2	TRUE	6.70798
1nc796_090_1919	NCU08606.2	1.249	1	1.24671	1.04597	0.11538	0.11877	0.11874	0.11339	0.11426	0.12154	0.12076	0.12341	0.06509	0.06509	0.06509	0.06509	0.03198	0.03198	0.03198	0.03198	0.12851	0.12851	0.12851	0.12851	0.9905	0.5092	0.9706	0.0095	0.0175	0.276	0.4908	0.9825	0.98	0.0294	0.724	0.02	0.16	0.4	TRUE	10.1368
1nc800_020_661	NCU08608.2	1.2061	1	1.31573	1.09892	0.21399	0.18123	0.23069	0.19767	0.22384	0.20778	0.22864	0.22417	0.1355	0.1355	0.1355	0.1355	0.06055	0.06055	0.06055	0.06055	0.19458	0.19458	0.19458	0.19458	0.9241	0.2297	0.7491	0.0759	0.0468	0.2125	0.7703	0.9532	0.9136	0.2509	0.7875	0.0864	0.27	0.24	TRUE	5.98001
1nc800_110_359	NCU08618.2	1.46373	1	1.80023	1.36673	0.28459	0.20442	0.31215	0.2521	0.30256	0.23547	0.30557	0.29458	0.14597	0.14597	0.14597	0.14597	0.06495	0.06495	0.06495	0.06495	0.20174	0.20174	0.20174	0.20174	0.9862	0.0756	0.6834	0.0138	0.004	0.0204	0.9244	0.996	0.9643	0.3166	0.9796	0.0357	0.28	0.26	TRUE	5.35279
1nc800_180_716	NCU08625.2	1.12626	1	1.10485	1.17589	0.28777	0.26023	0.27865	0.29925	0.32931	0.32019	0.31087	0.34316	0.21184	0.21184	0.21184	0.21184	0.09239	0.09239	0.09239	0.09239	0.27061	0.27061	0.27061	0.27061	0.7368	0.5404	0.4183	0.2632	0.3186	0.1977	0.4596	0.6814	0.3617	0.5817	0.8023	0.6383	0.38	0.35	TRUE	2.55417
1nc800_220_2803	NCU08628.2	1.656	1	2.55854	1.2205	0.37832	0.25301	0.50309	0.29075	0.43641	0.34328	0.46252	0.36769	0.18696	0.18696	0.18696	0.18696	0.0835	0.0835	0.0835	0.0835	0.23585	0.23585	0.23585	0.23585	0.9871	0.0173	0.9279	0.0129	0.0007	0.1255	0.9827	0.9993	0.998	0.0721	0.8745	0.002	0.32	0.31	TRUE	2.24686
1nc800_260_3991	NCU08632.2	1.16542	1	1.00836	1.01431	0.18066	0.16074	0.16599	0.16308	0.19235	0.17403	0.17644	0.18178	0.12028	0.12028	0.12028	0.12028	0.05351	0.05351	0.05351	0.05351	0.17667	0.17667	0.17667	0.17667	0.9118	0.8994	0.8642	0.0882	0.4644	0.4432	0.1006	0.5356	0.4755	0.1358	0.5568	0.5245	0.25	0.22	TRUE	6.80709
20h10_020_1346	NCU08925.2	1.08913	1	1.07553	1.07154	0.34782	0.33099	0.35823	0.3643	0.41962	0.41409	0.42511	0.4727	0.29878	0.29878	0.29878	0.29878	0.12445	0.12445	0.12445	0.12445	0.3215	0.3215	0.3215	0.3215	0.6315	0.5235	0.5201	0.3685	0.409	0.3985	0.4765	0.591	0.5101	0.4799	0.6015	0.4899	0.48	0.44	TRUE	0.13128
21d9_060_257	NCU04197.2	2.10387	1	1.90175	5.20242	0.65308	0.31171	0.55641	1.29608	1.05897	0.53548	0.65561	0.92521	0.17863	0.17863	0.17863	0.17863	0.0952	0.0952	0.0952	0.0952	0.40708	0.40708	0.40708	0.40708	0.9948	0.6917	0.0113	0.0052	0.0271	0.0008	0.3083	0.9729	0.0017	0.9887	0.9992	0.9983	0.31	0.35	TRUE	2.53811
29e8_060_1165	NCU04407.2	1.05706	1	1.05084	1.0567	0.15451	0.14709	0.14158	0.14455	0.15535	0.15842	0.1621	0.15699	0.1071	0.1071	0.1071	0.1071	0.04782	0.04782	0.04782	0.04782	0.15924	0.15924	0.15924	0.15924	0.722	0.5239	0.5042	0.278	0.323	0.2769	0.4761	0.677	0.4803	0.4958	0.7231	0.5197	0.22	0.2	TRUE	6.53797
29e8_150_306	NCU10107.2a	1.20162	1	1.25069	1.08136	0.14737	0.12633	0.15098	0.13839	0.14886	0.13588	0.16149	0.14077	0.09368	0.09368	0.09368	0.09368	0.04142	0.04142	0.04142	0.04142	0.1365	0.1365	0.1365	0.1365	0.9695	0.3037	0.8599	0.0305	0.0269	0.1788	0.6963	0.9731	0.9472	0.1401	0.8212	0.0528	0.2	0.18	TRUE	8.723
29e8_160_727	NCU10107.2b	1.18024	1	1.21242	1.09163	0.24782	0.21936	0.25589	0.2444	0.29231	0.25279	0.29143	0.2662	0.17409	0.17409	0.17409	0.17409	0.07724	0.07724	0.07724	0.07724	0.22831	0.22831	0.22831	0.22831	0.8599	0.4345	0.6799	0.1401	0.1438	0.2761	0.5655	0.8562	0.7596	0.3201	0.7239	0.2404	0.33	0.29	TRUE	3.60502
29e8_310_2933	NCU04384.2	1.20168	1	1.29395	1.02917	0.22795	0.20332	0.24791	0.21616	0.25614	0.23231	0.26429	0.24083	0.15578	0.15578	0.15578	0.15578	0.06903	0.06903	0.06903	0.06903	0.21263	0.21263	0.21263	0.21263	0.8967	0.2858	0.8356	0.1033	0.0731	0.4166	0.7142	0.9269	0.9343	0.1644	0.5834	0.0657	0.3	0.27	TRUE	3.15221
29e8_320_2909	NCU04383.2	1.84412	1	1.65092	1.60002	0.35562	0.2166	0.32097	0.3381	0.38647	0.2511	0.348	0.37035	0.15996	0.15996	0.15996	0.15996	0.06928	0.06928	0.06928	0.06928	0.21327	0.21327	0.21327	0.21327	0.9987	0.7905	0.803	0.0013	0.0083	0.008	0.2095	0.9917	0.5903	0.197	0.992	0.4097	0.3	0.27	TRUE	4.54882
29e8_330_1847	NCU04382.2	1.16349	1	1.08799	1.01025	0.14351	0.12643	0.13483	0.12699	0.13923	0.13519	0.14097	0.13393	0.09052	0.09052	0.09052	0.09052	0.04056	0.04056	0.04056	0.04056	0.14091	0.14091	0.14091	0.14091	0.9489	0.8033	0.9158	0.0511	0.1833	0.4488	0.1967	0.8167	0.8215	0.0842	0.5512	0.1785	0.2	0.17	TRUE	8.72324
29e8_410_1351	NCU04376.1	1.13714	1	1.24776	1.02668	0.30225	0.27264	0.31411	0.27869	0.31619	0.32082	0.35208	0.34788	0.22246	0.22246	0.22246	0.22246	0.09649	0.09649	0.09649	0.09649	0.26332	0.26332	0.26332	0.26332	0.7491	0.3099	0.6783	0.2509	0.1701	0.4511	0.6901	0.8299	0.8275	0.3217	0.5489	0.1725	0.4	0.36	TRUE	2.04254
2e4_050_682	NCU04234.2	1.071	1	1.0981	1.1009	0.16609	0.15102	0.15899	0.16415	0.17373	0.16818	0.17664	0.17685	0.11331	0.11331	0.11331	0.11331	0.04985	0.04985	0.04985	0.04985	0.16233	0.16233	0.16233	0.16233	0.7542	0.3939	0.4014	0.2458	0.2067	0.1676	0.6061	0.7933	0.4957	0.5986	0.8324	0.5043	0.24	0.21	TRUE	6.06156
2nc550_090_667	NCU08760.2	28.7305	1	95.9657	1.73827	8.88425	0.46793	22.1299	0.77007	19.9105	2.02854	8.96674	2.0361	0.23719	0.23719	0.23719	0.23719	0.12814	0.12814	0.12814	0.12814	0.52503	0.52503	0.52503	0.52503	0.9995	0.0048	1	0.0005	0	0.1343	0.9952	1	1	0	0.8657	0	0.27	0.42	TRUE	0.728556
2nc550_100_851	NCU08761.2	1.2795	1	1.09744	1.02221	0.16815	0.13665	0.14317	0.14882	0.17424	0.14707	0.16502	0.15343	0.1027	0.1027	0.1027	0.1027	0.04616	0.04616	0.04616	0.04616	0.15437	0.15437	0.15437	0.15437	0.9834	0.9349	0.9656	0.0166	0.1837	0.3969	0.0651	0.8163	0.7848	0.0344	0.6031	0.2152	0.21	0.19	TRUE	7.93191
2nc560_030_373	NCU08781.2	1.79558	1	1.34857	1.30744	0.57442	0.45977	0.44034	0.57965	0.57027	0.68712	0.47679	0.7206	0.24353	0.24353	0.24353	0.24353	0.12374	0.12374	0.12374	0.12374	0.43536	0.43536	0.43536	0.43536	0.9649	0.8791	0.8352	0.0351	0.194	0.2564	0.1209	0.806	0.5591	0.1648	0.7436	0.4409	0.46	0.43	TRUE	1.85596
2nc560_120_200	NCU08789.2	1.51032	1	2.04391	1.20462	0.56438	0.40236	0.70276	0.45818	0.67223	0.59076	0.74011	0.68578	0.33935	0.33935	0.33935	0.33935	0.13903	0.13903	0.13903	0.13903	0.36963	0.36963	0.36963	0.36963	0.9098	0.154	0.732	0.0902	0.0353	0.2675	0.846	0.9647	0.9368	0.268	0.7325	0.0632	0.5	0.48	TRUE	-4.25808
2nc560_180_975	NCU08795.2	1.28206	1	1.42507	1.0439	0.30424	0.26159	0.35386	0.28544	0.34578	0.32903	0.38155	0.33933	0.2131	0.2131	0.2131	0.2131	0.09107	0.09107	0.09107	0.09107	0.26499	0.26499	0.26499	0.26499	0.8999	0.2797	0.8239	0.1001	0.0705	0.4031	0.7203	0.9295	0.9279	0.1761	0.5969	0.0721	0.38	0.35	TRUE	2.5138
2nc560_190_1451	NCU08796.2	1.20459	1	1.02186	1.06393	0.34564	0.3015	0.33664	0.36693	0.38291	0.37144	0.44927	0.42635	0.24055	0.24055	0.24055	0.24055	0.11237	0.11237	0.11237	0.11237	0.33878	0.33878	0.33878	0.33878	0.7995	0.7774	0.6932	0.2005	0.4695	0.3925	0.2226	0.5305	0.4323	0.3068	0.6075	0.5677	0.44	0.4	TRUE	1.66673
2nc565_030_509	NCU01822.2	1.12265	1	1.29019	1.0098	0.35732	0.33475	0.42087	0.34139	0.4232	0.42362	0.46274	0.44317	0.29248	0.29248	0.29248	0.29248	0.12339	0.12339	0.12339	0.12339	0.32123	0.32123	0.32123	0.32123	0.681	0.2886	0.6338	0.319	0.2002	0.4887	0.7114	0.7998	0.808	0.3662	0.5113	0.192	0.48	0.43	TRUE	-4.06832
2nc610_080_66	2nc610_080	1.30849	1	1.40569	1.33475	0.18187	0.14682	0.19283	0.18215	0.19776	0.16306	0.19611	0.19567	0.10544	0.10544	0.10544	0.10544	0.04767	0.04767	0.04767	0.04767	0.14614	0.14614	0.14614	0.14614	0.9874	0.2241	0.4216	0.0126	0.0114	0.0096	0.7759	0.9886	0.7121	0.5784	0.9904	0.2879	0.22	0.19	TRUE	7.11042
2nc610_150_1599	NCU05007.2	1.19894	1	1.01087	1.22627	0.2875	0.24088	0.2704	0.32004	0.30588	0.27964	0.3375	0.34925	0.17951	0.17951	0.17951	0.17951	0.08705	0.08705	0.08705	0.08705	0.28962	0.28962	0.28962	0.28962	0.8563	0.8512	0.4584	0.1437	0.4799	0.1161	0.1488	0.5201	0.1775	0.5416	0.8839	0.8225	0.35	0.32	TRUE	3.71741
2nc610_170_456	NCU05005.2	2.14342	1	1.19262	1.13101	0.44222	0.24412	0.27683	0.27556	0.43478	0.29103	0.33265	0.34058	0.18609	0.18609	0.18609	0.18609	0.0809	0.0809	0.0809	0.0809	0.24456	0.24456	0.24456	0.24456	0.9982	0.9942	0.991	0.0018	0.1749	0.216	0.0058	0.8251	0.6356	0.009	0.784	0.3644	0.33	0.31	TRUE	3.42999
2nc610_180_918	NCU05004.2	1.13311	1	1.24612	1.04856	0.06551	0.06119	0.07197	0.0637	0.06997	0.06324	0.07356	0.0637	0.04268	0.04268	0.04268	0.04268	0.0193	0.0193	0.0193	0.0193	0.06646	0.06646	0.06646	0.06646	0.9899	0.0235	0.9395	0.0101	0.0022	0.1177	0.9765	0.9978	0.9977	0.0605	0.8823	0.0023	0.3	0.18	TRUE	14.678
2nc610_210_2910	NCU05013.2	1.43511	1	1.22664	1.08706	0.20794	0.13644	0.1808	0.15121	0.20975	0.14828	0.20758	0.16253	0.09036	0.09036	0.09036	0.09036	0.04472	0.04472	0.04472	0.04472	0.18451	0.18451	0.18451	0.18451	0.9944	0.9144	0.9774	0.0056	0.0466	0.1601	0.0856	0.9534	0.9099	0.0226	0.8399	0.0901	0.21	0.18	TRUE	8.32142
2nc610_230_879	NCU05015.2	1.28887	1	1.24667	1.58996	0.61731	0.47483	0.71765	1.0444	0.77478	0.7007	1.03137	1.28736	0.35917	0.35917	0.35917	0.35917	0.19085	0.19085	0.19085	0.19085	0.72089	0.72089	0.72089	0.72089	0.769	0.5492	0.3572	0.231	0.324	0.1747	0.4508	0.676	0.3509	0.6428	0.8253	0.6491	0.31	0.21	TRUE	0.819712
2nc610_250_396	NCU05017.2	1.07424	1	1.0876	1.035	0.19465	0.18175	0.19959	0.20248	0.21282	0.21485	0.22266	0.21533	0.14653	0.14653	0.14653	0.14653	0.0647	0.0647	0.0647	0.0647	0.18946	0.18946	0.18946	0.18946	0.7158	0.4585	0.606	0.2842	0.2795	0.3935	0.5415	0.7205	0.6567	0.394	0.6065	0.3433	0.29	0.26	TRUE	5.34064
2nc610_510_1533	NCU05043.2	1.11261	1	1.18929	1.01952	0.17047	0.1597	0.17084	0.16083	0.17006	0.16126	0.19485	0.17253	0.11497	0.11497	0.11497	0.11497	0.05086	0.05086	0.05086	0.05086	0.163	0.163	0.163	0.163	0.8498	0.2416	0.7729	0.1502	0.0824	0.4153	0.7584	0.9176	0.9168	0.2271	0.5847	0.0832	0.24	0.21	TRUE	7.31281
2nc610_520_1186	NCU05044.2	1.63948	1	1.30027	1.0834	0.26454	0.17082	0.23424	0.21899	0.24775	0.19821	0.25737	0.24401	0.11727	0.11727	0.11727	0.11727	0.05836	0.05836	0.05836	0.05836	0.21793	0.21793	0.21793	0.21793	0.9972	0.9599	0.986	0.0028	0.0524	0.228	0.0401	0.9476	0.8967	0.014	0.772	0.1033	0.26	0.23	TRUE	6.42848
2nc610_540_3089	NCU05046.2	1.05669	1	1.05884	1.03952	0.21558	0.21351	0.22415	0.22185	0.24068	0.23029	0.25088	0.24154	0.16707	0.16707	0.16707	0.16707	0.07327	0.07327	0.07327	0.07327	0.22444	0.22444	0.22444	0.22444	0.6556	0.4907	0.5427	0.3444	0.3635	0.3939	0.5093	0.6365	0.5449	0.4573	0.6061	0.4551	0.32	0.29	TRUE	4.1599
2nc610_670_739	NCU05059.2	1.11954	1	1.18979	1.04004	0.16576	0.14778	0.17129	0.15691	0.17371	0.16089	0.17539	0.17098	0.10971	0.10971	0.10971	0.10971	0.04904	0.04904	0.04904	0.04904	0.1588	0.1588	0.1588	0.1588	0.8661	0.2674	0.7413	0.1339	0.0795	0.3375	0.7326	0.9205	0.9005	0.2587	0.6625	0.0995	0.23	0.2	TRUE	7.75258
2nc610_680_746	NCU05060.2	1.15352	1	1.10403	1.1391	0.27595	0.24986	0.26889	0.29112	0.33504	0.31119	0.29666	0.32111	0.20468	0.20468	0.20468	0.20468	0.08677	0.08677	0.08677	0.08677	0.25948	0.25948	0.25948	0.25948	0.7869	0.6063	0.5211	0.2131	0.3163	0.2393	0.3937	0.6837	0.4321	0.4789	0.7607	0.5679	0.37	0.33	TRUE	0.0532476
2nc610_690_1041	NCU05061.2	1.44887	1	1.18892	1.00135	0.17674	0.13439	0.15668	0.13304	0.17662	0.14256	0.15864	0.15235	0.09831	0.09831	0.09831	0.09831	0.04358	0.04358	0.04358	0.04358	0.14124	0.14124	0.14124	0.14124	0.9972	0.9707	0.9945	0.0028	0.061	0.48735	0.0293	0.939	0.9523	0.0055	0.51265	0.0477	0.21	0.18	TRUE	7.91757
2nc610_710_117	NCU05063.2	1.34646	1	1.0329	1.05456	0.1724	0.14052	0.14459	0.13952	0.17253	0.15331	0.14884	0.15858	0.10196	0.10196	0.10196	0.10196	0.04448	0.04448	0.04448	0.04448	0.15304	0.15304	0.15304	0.15304	0.9887	0.9875	0.9735	0.0113	0.3768	0.2671	0.0125	0.6232	0.4077	0.0265	0.7329	0.5923	0.21	0.19	TRUE	7.2469
2nc612_040_400	NCU05071.2	1.32496	1	1.10369	1.07432	0.29285	0.2006	0.24513	0.22648	0.30764	0.2169	0.28185	0.25156	0.14667	0.14667	0.14667	0.14667	0.07007	0.07007	0.07007	0.07007	0.26124	0.26124	0.26124	0.26124	0.9609	0.863	0.8909	0.0391	0.2685	0.282	0.137	0.7315	0.5821	0.1091	0.718	0.4179	0.31	0.28	TRUE	5.17261
2nc612_060_183	NCU05073.2	1.94023	1	1.00701	1.04529	1.29863	0.64825	0.72081	0.6799	1.72096	1.03793	1.30026	1.08947	0.55617	0.55617	0.55617	0.55617	0.26837	0.26837	0.26837	0.26837	0.94661	0.94661	0.94661	0.94661	0.8437	0.7779	0.7779	0.1563	0.5163	0.4831	0.2221	0.4837	0.4542	0.2221	0.5169	0.5458	0.22	0.38	TRUE	-2.75662
2nc612_100_663	NCU05077.2	1.1424	1	1.16251	1.1139	0.2819	0.26475	0.27468	0.27791	0.33796	0.30931	0.31845	0.3238	0.20918	0.20918	0.20918	0.20918	0.08935	0.08935	0.08935	0.08935	0.2571	0.2571	0.2571	0.2571	0.7498	0.4602	0.5479	0.2502	0.245	0.2809	0.5398	0.755	0.6	0.4521	0.7191	0.4	0.38	0.34	TRUE	-0.271659
2nc612_110_613	NCU05078.2	1.10467	1	1.15472	1.06097	0.1897	0.18005	0.19918	0.19798	0.20863	0.19603	0.22134	0.20263	0.1368	0.1368	0.1368	0.1368	0.06149	0.06149	0.06149	0.06149	0.1825	0.1825	0.1825	0.1825	0.7975	0.349	0.6173	0.2025	0.1577	0.3089	0.651	0.8423	0.7577	0.3827	0.6911	0.2423	0.27	0.24	TRUE	6.01012
2nc612_120_1436	NCU05079.2	7.39643	1	1.46395	1.09391	0.8913	0.2246	0.29237	0.26055	0.53965	0.31736	0.46748	0.44017	0.14267	0.14267	0.14267	0.14267	0.06383	0.06383	0.06383	0.06383	0.21957	0.21957	0.21957	0.21957	1	0.9998	1	0	0.0213	0.2311	0.0002	0.9787	0.9664	0	0.7689	0.0336	0.17	0.26	TRUE	4.61723
2nc612_130_67	2nc612_130	1.1797	1	1.13408	1.04676	0.08294	0.07413	0.08111	0.07666	0.08788	0.08071	0.08382	0.07921	0.05283	0.05283	0.05283	0.05283	0.02377	0.02377	0.02377	0.02377	0.07934	0.07934	0.07934	0.07934	0.9925	0.8028	0.9683	0.0075	0.0314	0.1681	0.1972	0.9686	0.9383	0.0317	0.8319	0.0617	0.36	0.43	TRUE	13.1547
2nc700_050_543	NCU08453.2	1.04859	1	1.28481	1.05712	0.13363	0.13892	0.15083	0.14421	0.14459	0.14432	0.16225	0.14917	0.09841	0.09841	0.09841	0.09841	0.04413	0.04413	0.04413	0.04413	0.14169	0.14169	0.14169	0.14169	0.7003	0.0243	0.4676	0.2997	0.0206	0.2708	0.9757	0.9794	0.97	0.5324	0.7292	0.03	0.2	0.18	TRUE	7.56274
2nc819_030_985	NCU08421.2	1.14902	1	1.26597	1.0335	0.24343	0.22035	0.26476	0.22929	0.26905	0.25658	0.2803	0.2655	0.17264	0.17264	0.17264	0.17264	0.07673	0.07673	0.07673	0.07673	0.23751	0.23751	0.23751	0.23751	0.8201	0.2524	0.7179	0.1799	0.1015	0.4085	0.7476	0.8985	0.8862	0.2821	0.5915	0.1138	0.33	0.3	TRUE	4.0273
2nc820_040_4723	NCU08404.2	1.08689	1	1.15578	1.09882	0.21355	0.20688	0.23324	0.22379	0.2362	0.22893	0.24372	0.25626	0.15734	0.15734	0.15734	0.15734	0.06985	0.06985	0.06985	0.06985	0.21079	0.21079	0.21079	0.21079	0.7417	0.3267	0.4765	0.2583	0.1828	0.2428	0.6733	0.8172	0.6459	0.5235	0.7572	0.3541	0.31	0.27	TRUE	4.62059
2nc820_050_1318	NCU08405.2	1.16971	1	1.09679	1.09683	0.24704	0.22774	0.23946	0.24689	0.26904	0.26013	0.26523	0.2795	0.17884	0.17884	0.17884	0.17884	0.0773	0.0773	0.0773	0.0773	0.23992	0.23992	0.23992	0.23992	0.8421	0.6644	0.6399	0.1579	0.3	0.2768	0.3356	0.7	0.4961	0.3601	0.7232	0.5039	0.34	0.3	TRUE	3.78335
2nc820_080_742	NCU08407.2b	1.11039	1	1.149	1.05314	0.07555	0.07328	0.07768	0.07604	0.08047	0.0739	0.08311	0.07639	0.05106	0.05106	0.05106	0.05106	0.02264	0.02264	0.02264	0.02264	0.07921	0.07921	0.07921	0.07921	0.9719	0.2227	0.8422	0.0281	0.0171	0.1331	0.7773	0.9829	0.9518	0.1578	0.8669	0.0482	0.45	0.17	TRUE	13.2262
2nc820_110_885	2nc820_110	1.13817	1	1.23176	1.15681	0.28983	0.27243	0.30947	0.30644	0.32654	0.31615	0.33609	0.35739	0.21982	0.21982	0.21982	0.21982	0.0922	0.0922	0.0922	0.0922	0.26928	0.26928	0.26928	0.26928	0.7484	0.3313	0.4658	0.2516	0.1821	0.2354	0.6687	0.8179	0.6316	0.5342	0.7646	0.3684	0.39	0.35	TRUE	2.27674
2nc820_180_244	NCU08415.2	1.18763	1	1.13724	1.08805	0.14354	0.12563	0.137	0.13817	0.15542	0.13713	0.14679	0.14758	0.09383	0.09383	0.09383	0.09383	0.04195	0.04195	0.04195	0.04195	0.13873	0.13873	0.13873	0.13873	0.9606	0.7072	0.8208	0.0394	0.1011	0.1546	0.2928	0.8989	0.7143	0.1792	0.8454	0.2857	0.2	0.18	TRUE	8.63938
2nc825_010_1464	NCU08393.2	1.03034	1	1.04151	1.23298	0.31834	0.31429	0.42552	0.51827	0.35843	0.32144	0.54677	0.58883	0.20572	0.20572	0.20572	0.20572	0.10687	0.10687	0.10687	0.10687	0.40812	0.40812	0.40812	0.40812	0.5695	0.4974	0.272	0.4305	0.4445	0.1735	0.5026	0.5555	0.3112	0.728	0.8265	0.6888	0.42	0.39	TRUE	3.10742
2nc825_050_2395	NCU08397.2	1.80083	1	1.6008	1.17762	0.26747	0.18208	0.245	0.21229	0.28484	0.20648	0.25678	0.22887	0.12666	0.12666	0.12666	0.12666	0.05787	0.05787	0.05787	0.05787	0.17399	0.17399	0.17399	0.17399	0.9992	0.8562	0.9918	0.0008	0.0048	0.0855	0.1438	0.9952	0.9851	0.0082	0.9145	0.0149	0.25	0.23	TRUE	6.4507
2nc850_020_697	NCU09765.2	1.22639	1	1.46661	1.0724	0.21452	0.18093	0.24806	0.20093	0.24539	0.21671	0.25261	0.21373	0.1351	0.1351	0.1351	0.1351	0.06045	0.06045	0.06045	0.06045	0.20013	0.20013	0.20013	0.20013	0.9294	0.0877	0.8281	0.0706	0.0161	0.2761	0.9123	0.9839	0.9789	0.1719	0.7239	0.0211	0.27	0.24	TRUE	5.63071
2nc850_070_1347	NCU09771.2	1.06178	1	1.05331	1.11081	0.28687	0.28543	0.288	0.30917	0.32555	0.30927	0.32261	0.35106	0.15833	0.15833	0.15833	0.15833	0.08692	0.08692	0.08692	0.08692	0.36339	0.36339	0.36339	0.36339	0.6412	0.5237	0.4009	0.3588	0.3933	0.2396	0.4763	0.6067	0.3778	0.5991	0.7604	0.6222	0.35	0.32	TRUE	3.87654
2nc850_090_2219	NCU09773.2	1.21921	1	1.18944	1.03435	0.27584	0.24675	0.28095	0.244	0.30372	0.26702	0.2978	0.28694	0.18963	0.18963	0.18963	0.18963	0.08229	0.08229	0.08229	0.08229	0.2438	0.2438	0.2438	0.2438	0.8818	0.5609	0.796	0.1182	0.1833	0.4143	0.4391	0.8167	0.7946	0.204	0.5857	0.2054	0.35	0.32	TRUE	0.695245
3nc114_040_1418	NCU05658.2	1.41348	1	1.0209	1.0961	0.31638	0.24296	0.24666	0.27599	0.34258	0.29095	0.29367	0.31343	0.19775	0.19775	0.19775	0.19775	0.08489	0.08489	0.08489	0.08489	0.24012	0.24012	0.24012	0.24012	0.9607	0.9532	0.8931	0.0393	0.4581	0.2928	0.0468	0.5419	0.3489	0.1069	0.7072	0.6511	0.36	0.33	TRUE	1.67089
3nc116_060_160	NCU05665.2	1.06454	1	1.0827	1.02042	0.09157	0.09053	0.09431	0.0892	0.09263	0.0927	0.1005	0.09414	0.06338	0.06338	0.06338	0.06338	0.02811	0.02811	0.02811	0.02811	0.10335	0.10335	0.10335	0.10335	0.8578	0.3731	0.7432	0.1422	0.1182	0.3502	0.6269	0.8818	0.8488	0.2568	0.6498	0.1512	0.27	0.22	TRUE	11.6951
3nc118_100_687	NCU05681.2	1.27573	1	1.00318	1.08053	0.33457	0.24306	0.27288	0.27194	0.3595	0.26891	0.33215	0.29273	0.18277	0.18277	0.18277	0.18277	0.08732	0.08732	0.08732	0.08732	0.29482	0.29482	0.29482	0.29482	0.9128	0.8681	0.7972	0.0872	0.4935	0.3187	0.1319	0.5065	0.3294	0.2028	0.6813	0.6706	0.37	0.33	TRUE	2.88409
3nc120_050_515	NCU05688.2	1.41635	1	1.01966	1.08141	0.29801	0.25541	0.27185	0.31869	0.3075	0.29839	0.27708	0.36627	0.14873	0.14873	0.14873	0.14873	0.07979	0.07979	0.07979	0.07979	0.35232	0.35232	0.35232	0.35232	0.9693	0.9698	0.9071	0.0307	0.456	0.3256	0.0302	0.544	0.3635	0.0929	0.6744	0.6365	0.34	0.31	TRUE	5.37476
3nc120_090_2065	NCU05693.2	1.15248	1	1.38549	1.06807	0.24388	0.23469	0.29882	0.24441	0.28659	0.26143	0.32103	0.277	0.18003	0.18003	0.18003	0.18003	0.07875	0.07875	0.07875	0.07875	0.23629	0.23629	0.23629	0.23629	0.818	0.1311	0.6677	0.182	0.0571	0.3312	0.8689	0.9429	0.9256	0.3323	0.6688	0.0744	0.34	0.31	TRUE	3.77163
3nc120_100_1837	NCU05694.2	1.13324	1	1.14697	1.04661	0.26218	0.24497	0.27725	0.26486	0.30343	0.29747	0.31491	0.29747	0.20138	0.20138	0.20138	0.20138	0.0882	0.0882	0.0882	0.0882	0.25015	0.25015	0.25015	0.25015	0.7749	0.4752	0.6572	0.2251	0.2503	0.3966	0.5248	0.7497	0.6934	0.3428	0.6034	0.3066	0.37	0.33	TRUE	2.95601
3nc120_120_743	NCU05696.2a	1.11496	1	1.09706	1.03263	0.22498	0.20789	0.22073	0.22109	0.2459	0.23742	0.24787	0.24494	0.15988	0.15988	0.15988	0.15988	0.07205	0.07205	0.07205	0.07205	0.21985	0.21985	0.21985	0.21985	0.7769	0.5446	0.6901	0.2231	0.2821	0.4144	0.4554	0.7179	0.68	0.3099	0.5856	0.32	0.32	0.28	TRUE	4.84163
3nc120_230_1251	NCU05708.2	1.05678	1	1.18499	1.14069	0.12048	0.11743	0.12932	0.12978	0.13096	0.12092	0.13528	0.13379	0.08543	0.08543	0.08543	0.08543	0.03763	0.03763	0.03763	0.03763	0.13124	0.13124	0.13124	0.13124	0.7587	0.076	0.183	0.2413	0.0459	0.0606	0.924	0.9541	0.6974	0.817	0.9394	0.3026	0.18	0.16	TRUE	9.28397
3nc140_020_590	NCU05730.2	1.24042	1	1.36241	1.01261	0.3432	0.29786	0.42967	0.31384	0.36927	0.35149	0.47031	0.43267	0.22445	0.22445	0.22445	0.22445	0.10358	0.10358	0.10358	0.10358	0.33675	0.33675	0.33675	0.33675	0.8509	0.3238	0.7828	0.1491	0.1214	0.4631	0.6762	0.8786	0.8627	0.2172	0.5369	0.1373	0.41	0.38	TRUE	2.65287
3nc185_060_1333	NCU07820.2	1.2862	1	1.17222	1.00166	0.50262	0.35782	0.40635	0.32389	0.60506	0.44471	0.47922	0.40577	0.24453	0.24453	0.24453	0.24453	0.12367	0.12367	0.12367	0.12367	0.40475	0.40475	0.40475	0.40475	0.8055	0.6401	0.7908	0.1945	0.2697	0.4892	0.3599	0.7303	0.767	0.2092	0.5108	0.233	0.46	0.44	TRUE	0.676572
3nc185_210_657	NCU07836.2	1.42539	1	1.15362	1.51354	0.53972	0.37059	0.54971	0.86483	0.55175	0.48252	0.72777	1.04006	0.23053	0.23053	0.23053	0.23053	0.13756	0.13756	0.13756	0.13756	0.55814	0.55814	0.55814	0.55814	0.9105	0.8285	0.4395	0.0895	0.3256	0.1264	0.1715	0.6744	0.2657	0.5605	0.8736	0.7343	0.47	0.45	TRUE	2.43882
3nc190_020_247	NCU07843.2	1.14562	1	1.17554	1.00757	0.18192	0.16127	0.18698	0.16349	0.19317	0.18478	0.20192	0.18043	0.12579	0.12579	0.12579	0.12579	0.05477	0.05477	0.05477	0.05477	0.16709	0.16709	0.16709	0.16709	0.8827	0.3997	0.8341	0.1173	0.1142	0.4636	0.6003	0.8858	0.8981	0.1659	0.5364	0.1019	0.26	0.23	TRUE	6.57078
3nc190_090_687	NCU07851.2	1.07688	1	1.23795	1.07323	0.13155	0.12718	0.14424	0.13308	0.14052	0.13461	0.15456	0.1331	0.09074	0.09074	0.09074	0.09074	0.04041	0.04041	0.04041	0.04041	0.13915	0.13915	0.13915	0.13915	0.816	0.0587	0.5194	0.184	0.0297	0.1897	0.9413	0.9703	0.9425	0.4806	0.8103	0.0575	0.2	0.17	TRUE	8.85078
3nc190_100_442	NCU07852.2	1.30389	1	1.16786	1.09501	0.43857	0.37136	0.37074	0.37078	0.53297	0.45414	0.44773	0.44482	0.30127	0.30127	0.30127	0.30127	0.1255	0.1255	0.1255	0.1255	0.34959	0.34959	0.34959	0.34959	0.8118	0.6677	0.7098	0.1882	0.3023	0.3575	0.3323	0.6977	0.5992	0.2902	0.6425	0.4008	0.48	0.45	TRUE	-0.457532
3nc190_280_2892	NCU07870.2	1.08656	1	1.18803	1.00231	0.09208	0.07646	0.10463	0.07456	0.09395	0.08105	0.09854	0.07827	0.04771	0.04771	0.04771	0.04771	0.02382	0.02382	0.02382	0.02382	0.10285	0.10285	0.10285	0.10285	0.9417	0.0716	0.9068	0.0583	0.0179	0.4701	0.9284	0.9821	0.9893	0.0932	0.5299	0.0107	0.33	0.29	TRUE	12.7508
3nc190_290_1962	NCU07871.2	1.15119	1	1.11871	1.02339	0.31224	0.27188	0.30047	0.28135	0.33698	0.33102	0.33893	0.35136	0.22491	0.22491	0.22491	0.22491	0.09683	0.09683	0.09683	0.09683	0.26527	0.26527	0.26527	0.26527	0.7623	0.5541	0.7008	0.2377	0.3075	0.4557	0.4459	0.6925	0.6705	0.2992	0.5443	0.3295	0.4	0.36	TRUE	2.2025
3nc195_020_1400	NCU07877.2a	1.18032	1	1.33177	1.00153	0.2149	0.18787	0.24058	0.18881	0.23472	0.21061	0.2485	0.22807	0.14487	0.14487	0.14487	0.14487	0.0648	0.0648	0.0648	0.0648	0.20018	0.20018	0.20018	0.20018	0.8889	0.171	0.8524	0.1111	0.0451	0.4962	0.829	0.9549	0.9667	0.1476	0.5038	0.0333	0.29	0.26	TRUE	5.5972
3nc195_070_811	NCU07881.2	1.01381	1	1.56881	1.15007	0.1607	0.16249	0.22854	0.17639	0.17336	0.17618	0.21532	0.19749	0.11591	0.11591	0.11591	0.11591	0.05199	0.05199	0.05199	0.05199	0.16981	0.16981	0.16981	0.16981	0.5488	0.003	0.1505	0.4512	0.0044	0.0937	0.997	0.9956	0.986	0.8495	0.9063	0.014	0.23	0.21	TRUE	5.64898
3nc195_100_629	NCU07884.2	1.04103	1	1.01355	1.14976	0.18272	0.16606	0.16878	0.18895	0.19616	0.18224	0.18241	0.20266	0.12978	0.12978	0.12978	0.12978	0.0573	0.0573	0.0573	0.0573	0.18677	0.18677	0.18677	0.18677	0.6488	0.5988	0.2227	0.3512	0.4617	0.121	0.4012	0.5383	0.1417	0.7773	0.879	0.8583	0.26	0.23	TRUE	6.10659
3nc195_150_2016	NCU07889.2	1.38537	1	1.19221	1.01947	0.39209	0.26347	0.34081	0.27528	0.40956	0.32656	0.42633	0.31583	0.19813	0.19813	0.19813	0.19813	0.09388	0.09388	0.09388	0.09388	0.30156	0.30156	0.30156	0.30156	0.945	0.7485	0.898	0.055	0.2189	0.4508	0.2515	0.7811	0.8059	0.102	0.5492	0.1941	0.38	0.35	TRUE	3.26167
3nc215_020_3219	NCU06407.2	1.13681	1	1.04784	1.15198	0.19639	0.17959	0.18705	0.20502	0.20804	0.19904	0.20413	0.21582	0.13678	0.13678	0.13678	0.13678	0.06039	0.06039	0.06039	0.06039	0.19405	0.19405	0.19405	0.19405	0.847	0.7543	0.4635	0.153	0.3652	0.1349	0.2457	0.6348	0.2146	0.5365	0.8651	0.7854	0.28	0.25	TRUE	5.81814
3nc215_060_1094	NCU06412.2	1.26293	1	1.57071	1.09191	0.30164	0.25736	0.42194	0.3111	0.35359	0.3164	0.41362	0.3858	0.1869	0.1869	0.1869	0.1869	0.08711	0.08711	0.08711	0.08711	0.2975	0.2975	0.2975	0.2975	0.902	0.1177	0.759	0.098	0.0393	0.3088	0.8823	0.9607	0.9359	0.241	0.6912	0.0641	0.37	0.34	TRUE	4.09724
3nc215_080_1782	NCU06414.2	1.11433	1	1.10951	1.02606	0.22267	0.1967	0.21878	0.20345	0.23245	0.22788	0.23784	0.23587	0.15919	0.15919	0.15919	0.15919	0.06946	0.06946	0.06946	0.06946	0.21836	0.21836	0.21836	0.21836	0.7808	0.5205	0.7017	0.2192	0.2626	0.4174	0.4795	0.7374	0.7158	0.2983	0.5826	0.2842	0.31	0.28	TRUE	3.72449
3nc220_030_888	NCU06417.2	1.0948	1	1.1056	1.188	0.16719	0.16258	0.16513	0.17882	0.18833	0.17207	0.18351	0.19104	0.12103	0.12103	0.12103	0.12103	0.05353	0.05353	0.05353	0.05353	0.16719	0.16719	0.16719	0.16719	0.8064	0.4557	0.2457	0.1936	0.2006	0.0717	0.5443	0.7994	0.2454	0.7543	0.9283	0.7546	0.25	0.22	TRUE	5.9361
3nc220_100_1194	NCU06421.2b	1.67814	1	1.30521	1.01858	0.81736	0.50018	0.74995	0.68774	0.79389	0.80176	0.9509	1.38683	0.40387	0.40387	0.40387	0.40387	0.20495	0.20495	0.20495	0.20495	0.75655	0.75655	0.75655	0.75655	0.8745	0.7648	0.7728	0.1255	0.3179	0.5063	0.2352	0.6821	0.6381	0.2272	0.4937	0.3619	0.16	0.31	TRUE	-0.705596
3nc220_420_370	NCU06455.2	1.44894	1	1.20545	1.08866	0.60523	0.42737	0.6042	0.66569	0.58439	0.55115	0.75951	1.06213	0.29606	0.29606	0.29606	0.29606	0.16309	0.16309	0.16309	0.16309	0.646	0.646	0.646	0.646	0.8771	0.7537	0.7343	0.1229	0.317	0.4204	0.2463	0.683	0.5808	0.2657	0.5796	0.4192	0.29	0.29	TRUE	1.10862
3nc220_540_744	NCU06467.2	1.38687	1	1.36216	1.05749	0.29138	0.24831	0.2705	0.22477	0.32136	0.28841	0.27721	0.25767	0.14824	0.14824	0.14824	0.14824	0.07221	0.07221	0.07221	0.07221	0.2665	0.2665	0.2665	0.2665	0.9534	0.5531	0.9285	0.0466	0.0524	0.3401	0.4469	0.9476	0.9471	0.0715	0.6599	0.0529	0.31	0.28	TRUE	3.38585
3nc220_570_798	NCU06470.2	1.20798	1	1.19209	1.06253	0.31911	0.28013	0.33538	0.31521	0.36321	0.33779	0.37805	0.37847	0.2394	0.2394	0.2394	0.2394	0.10315	0.10315	0.10315	0.10315	0.29031	0.29031	0.29031	0.29031	0.8303	0.5235	0.7053	0.1697	0.2272	0.3821	0.4765	0.7728	0.7052	0.2947	0.6179	0.2948	0.42	0.38	TRUE	1.66881
3nc225_040_1996	NCU06481.2	1.06867	1	1.00898	1.07565	0.2996	0.25652	0.29707	0.29148	0.37415	0.29281	0.3483	0.30829	0.19982	0.19982	0.19982	0.19982	0.09293	0.09293	0.09293	0.09293	0.30812	0.30812	0.30812	0.30812	0.6522	0.606	0.4861	0.3478	0.4834	0.3385	0.394	0.5166	0.3567	0.5139	0.6615	0.6433	0.39	0.36	TRUE	3.04162
3nc225_070_5259	NCU06484.2	1.86287	1	1.33636	1.17119	1.13457	0.50512	0.92484	0.59846	1.34968	0.68092	1.50192	0.86914	0.41071	0.41071	0.41071	0.41071	0.21896	0.21896	0.21896	0.21896	0.77742	0.77742	0.77742	0.77742	0.9068	0.684	0.7963	0.0932	0.3144	0.317	0.316	0.6856	0.5993	0.2037	0.683	0.4007	0.2	0.41	TRUE	-0.511769
3nc225_100_1096	NCU06487.2	1.22851	1	1.5677	1.26825	0.44609	0.28181	0.70925	0.36173	0.56826	0.35368	0.68257	0.41132	0.14293	0.14293	0.14293	0.14293	0.09161	0.09161	0.09161	0.09161	0.44259	0.44259	0.44259	0.44259	0.8949	0.2083	0.4264	0.1051	0.086	0.0875	0.7917	0.914	0.8243	0.5736	0.9125	0.1757	0.35	0.33	TRUE	6.13248
3nc225_130_426	NCU06490.2	3.1264	1	2.47265	1.19878	0.89202	0.31004	0.68811	0.38864	0.77813	0.44685	0.78279	0.55185	0.18014	0.18014	0.18014	0.18014	0.09655	0.09655	0.09655	0.09655	0.37789	0.37789	0.37789	0.37789	0.9987	0.8578	0.9933	0.0013	0.0075	0.2001	0.1422	0.9925	0.9936	0.0067	0.7999	0.0064	0.33	0.35	TRUE	3.43432
3nc225_170_1096	NCU06494.2b	1.14392	1	1.2131	1.03782	0.21302	0.19024	0.22869	0.1973	0.22854	0.217	0.2368	0.21872	0.14632	0.14632	0.14632	0.14632	0.06479	0.06479	0.06479	0.06479	0.20224	0.20224	0.20224	0.20224	0.8412	0.3091	0.7384	0.1588	0.1098	0.3827	0.6909	0.8902	0.875	0.2616	0.6173	0.125	0.29	0.26	TRUE	5.25974
3nc225_200_1350	NCU06497.2	1.0888	1	1.05167	1.07983	0.2169	0.20934	0.2224	0.21908	0.23943	0.2393	0.23464	0.25024	0.16194	0.16194	0.16194	0.16194	0.07066	0.07066	0.07066	0.07066	0.21249	0.21249	0.21249	0.21249	0.7316	0.6005	0.5207	0.2684	0.383	0.2857	0.3995	0.617	0.4255	0.4793	0.7143	0.5745	0.32	0.28	TRUE	4.73935
3nc225_220_2425	NCU06499.2	1.41001	1	1.29302	1.02654	0.58782	0.37178	0.5667	0.40604	0.65285	0.50738	0.57736	0.57551	0.23007	0.23007	0.23007	0.23007	0.13713	0.13713	0.13713	0.13713	0.58998	0.58998	0.58998	0.58998	0.8753	0.6395	0.8435	0.1247	0.1965	0.438	0.3605	0.8035	0.795	0.1565	0.562	0.205	0.46	0.45	TRUE	3.24284
3nc225_270_621	NCU06505.2	1.05016	1	1.15643	1.27824	0.22587	0.20625	0.23147	0.25785	0.24881	0.23964	0.27717	0.27382	0.16497	0.16497	0.16497	0.16497	0.07365	0.07365	0.07365	0.07365	0.21027	0.21027	0.21027	0.21027	0.637	0.2498	0.1266	0.363	0.1924	0.0602	0.7502	0.8076	0.2313	0.8734	0.9398	0.7687	0.32	0.28	TRUE	3.62927
3nc250_020_2458	NCU07582.2	1.58895	1	1.44916	1.10432	0.24526	0.17316	0.22575	0.18989	0.24753	0.20498	0.24114	0.21958	0.12474	0.12474	0.12474	0.12474	0.05639	0.05639	0.05639	0.05639	0.18549	0.18549	0.18549	0.18549	0.9963	0.793	0.9832	0.0037	0.0153	0.1801	0.207	0.9847	0.9727	0.0168	0.8199	0.0273	0.25	0.23	TRUE	6.69513
3nc270_140_1401	NCU07620.2	1.04686	1	1.12224	1.03833	0.1262	0.11909	0.12858	0.11829	0.12967	0.12235	0.13717	0.12908	0.08517	0.08517	0.08517	0.08517	0.03765	0.03765	0.03765	0.03765	0.13335	0.13335	0.13335	0.13335	0.7306	0.1844	0.5473	0.2694	0.1087	0.305	0.8156	0.8913	0.8424	0.4527	0.695	0.1576	0.19	0.17	TRUE	9.36034
3nc270_150_1041	NCU07621.2	1.39822	1	1.50062	1.07503	0.35464	0.28053	0.52194	0.39189	0.35273	0.32662	0.53698	0.53167	0.17379	0.17379	0.17379	0.17379	0.09239	0.09239	0.09239	0.09239	0.33341	0.33341	0.33341	0.33341	0.9431	0.3379	0.8521	0.0569	0.0792	0.3342	0.6621	0.9208	0.8562	0.1479	0.6658	0.1438	0.37	0.34	TRUE	3.96364
3nc280_030_604	NCU07654.2	1.317	1	1.19864	1.05703	0.37428	0.24821	0.28763	0.25127	0.393	0.30223	0.31338	0.28772	0.1479	0.1479	0.1479	0.1479	0.0789	0.0789	0.0789	0.0789	0.33923	0.33923	0.33923	0.33923	0.913	0.7144	0.8661	0.087	0.1557	0.3331	0.2856	0.8443	0.8159	0.1339	0.6669	0.1841	0.33	0.31	TRUE	5.61794
3nc300_110_1527	3nc300_110	1.13759	1	1.13381	1.0353	0.21228	0.19484	0.20752	0.19823	0.2272	0.21739	0.23363	0.22415	0.14723	0.14723	0.14723	0.14723	0.06424	0.06424	0.06424	0.06424	0.21769	0.21769	0.21769	0.21769	0.8311	0.5104	0.7412	0.1689	0.2081	0.3959	0.4896	0.7919	0.7581	0.2588	0.6041	0.2419	0.29	0.26	TRUE	5.35034
3nc305_050_3243	NCU06202.2	1.12007	1	1.14436	1.00121	0.25246	0.2308	0.26958	0.24688	0.28668	0.27164	0.29249	0.28311	0.19368	0.19368	0.19368	0.19368	0.08307	0.08307	0.08307	0.08307	0.25018	0.25018	0.25018	0.25018	0.7493	0.44204	0.7157	0.2507	0.2443	0.4948	0.55796	0.7557	0.7779	0.2843	0.5052	0.2221	0.36	0.32	TRUE	3.19074
3nc305_060_661	NCU06203.2	1.19324	1	1.12896	2.49277	0.18784	0.14842	0.16849	0.28724	0.21274	0.17048	0.18171	0.2733	0.10599	0.10599	0.10599	0.10599	0.04769	0.04769	0.04769	0.04769	0.15393	0.15393	0.15393	0.15393	0.9485	0.7259	0.0006	0.0515	0.1404	0	0.2741	0.8596	0	0.9994	1	1	0.2	0.2	TRUE	7.70434
3nc305_150_1146	NCU06213.2	1.21843	1	1.03282	1.11095	0.41442	0.34482	0.44458	0.57392	0.38957	0.39082	0.53493	0.77831	0.19038	0.19038	0.19038	0.19038	0.11598	0.11598	0.11598	0.11598	0.50758	0.50758	0.50758	0.50758	0.8381	0.8159	0.6251	0.1619	0.454	0.3365	0.1841	0.546	0.4178	0.3749	0.6635	0.5822	0.43	0.4	TRUE	4.39341
3nc310_090_628	NCU06227.2	1.19598	1	1.07197	1.14242	0.47519	0.4215	0.53177	0.70043	0.52902	0.51141	0.72486	0.91837	0.27921	0.27921	0.27921	0.27921	0.15859	0.15859	0.15859	0.15859	0.58185	0.58185	0.58185	0.58185	0.7446	0.6709	0.5485	0.2554	0.4327	0.3632	0.3291	0.5673	0.4521	0.4515	0.6368	0.5479	0.31	0.5	TRUE	1.46103
3nc310_120_1827	NCU06230.2	4.81406	1	1.14937	1.08278	0.35594	0.14188	0.1557	0.16294	0.30896	0.15728	0.18525	0.20568	0.0906	0.0906	0.0906	0.0906	0.04049	0.04049	0.04049	0.04049	0.14052	0.14052	0.14052	0.14052	1	1	1	0	0.0793	0.1582	0	0.9207	0.769	0	0.8418	0.231	0.48	0.17	TRUE	8.13918
3nc310_150_1836	NCU06233.2	1.52259	1	1.59204	1.34393	0.62054	0.42253	0.75029	0.70444	0.74486	0.62796	0.98144	0.90457	0.37617	0.37617	0.37617	0.37617	0.16427	0.16427	0.16427	0.16427	0.45284	0.45284	0.45284	0.45284	0.88	0.4309	0.6205	0.12	0.1645	0.2126	0.5691	0.8355	0.6202	0.3795	0.7874	0.3798	0.17	0.17	TRUE	-3.33617
3nc310_230_370	NCU06242.2	1.22293	1	1.28366	1.00263	0.22578	0.19821	0.2939	0.22302	0.24344	0.22962	0.27813	0.29566	0.13651	0.13651	0.13651	0.13651	0.06501	0.06501	0.06501	0.06501	0.24889	0.24889	0.24889	0.24889	0.9237	0.3548	0.8837	0.0763	0.0839	0.4851	0.6452	0.9161	0.9101	0.1163	0.5149	0.0899	0.29	0.27	TRUE	4.65428
3nc315_030_689	NCU06254.2	1.21391	1	1.24704	1.02422	0.25054	0.21672	0.23703	0.20602	0.26296	0.23558	0.26741	0.25074	0.16098	0.16098	0.16098	0.16098	0.07086	0.07086	0.07086	0.07086	0.22863	0.22863	0.22863	0.22863	0.9002	0.4262	0.8444	0.0998	0.0997	0.4322	0.5738	0.9003	0.8999	0.1556	0.5678	0.1001	0.31	0.28	TRUE	4.75069
3nc315_060_1775	NCU06256.2b	1.16454	1	1.18867	1.1293	0.26654	0.22543	0.31801	0.26709	0.30608	0.24073	0.34868	0.29038	0.13142	0.13142	0.13142	0.13142	0.07052	0.07052	0.07052	0.07052	0.31285	0.31285	0.31285	0.31285	0.8735	0.445	0.5817	0.1265	0.1607	0.1654	0.555	0.8393	0.6347	0.4183	0.8346	0.3653	0.31	0.28	TRUE	5.53716
3nc315_120_789	NCU06262.2	1.31419	1	1.2244	1.01356	0.27322	0.23325	0.26406	0.24508	0.31081	0.27057	0.29272	0.27388	0.18269	0.18269	0.18269	0.18269	0.07846	0.07846	0.07846	0.07846	0.23695	0.23695	0.23695	0.23695	0.9399	0.6787	0.9118	0.0601	0.1407	0.4706	0.3213	0.8593	0.8742	0.0882	0.5294	0.1258	0.34	0.31	TRUE	1.30963
3nc320_030_507	NCU06267.2	1.36576	1	1.13858	1.0164	0.16219	0.13057	0.1384	0.13189	0.15893	0.13236	0.14625	0.14019	0.09138	0.09138	0.09138	0.09138	0.0409	0.0409	0.0409	0.0409	0.14002	0.14002	0.14002	0.14002	0.9942	0.9694	0.9893	0.0058	0.0924	0.4049	0.0306	0.9076	0.9061	0.0107	0.5951	0.0939	0.2	0.18	TRUE	8.64473
3nc400_030_1680	NCU00005.2	1.06166	1	1.12999	1.01688	0.09342	0.0871	0.08886	0.08941	0.09364	0.08758	0.09511	0.09802	0.06368	0.06368	0.06368	0.06368	0.02882	0.02882	0.02882	0.02882	0.0905	0.0905	0.0905	0.0905	0.8489	0.1353	0.7489	0.1511	0.0436	0.3802	0.8647	0.9564	0.9487	0.2511	0.6198	0.0513	0.47	0.35	TRUE	11.0542
3nc400_220_536	NCU00027.2	1.2818	1	1.24473	1.29405	0.43728	0.36229	0.54225	0.66309	0.4435	0.41727	0.62074	0.85899	0.19674	0.19674	0.19674	0.19674	0.11796	0.11796	0.11796	0.11796	0.5537	0.5537	0.5537	0.5537	0.8804	0.5757	0.4958	0.1196	0.2046	0.1837	0.4243	0.7954	0.4605	0.5042	0.8163	0.5395	0.43	0.41	TRUE	3.94827
3nc400_280_171	NCU00033.1	1.25069	1	1.39339	1.43661	0.39577	0.31686	0.6698	0.56978	0.45462	0.36583	0.76434	0.68044	0.16433	0.16433	0.16433	0.16433	0.09989	0.09989	0.09989	0.09989	0.50617	0.50617	0.50617	0.50617	0.8889	0.3117	0.2675	0.1111	0.1426	0.0526	0.6883	0.8574	0.4581	0.7325	0.9474	0.5419	0.38	0.36	TRUE	4.6305
3nc415_050_1816	NCU00065.2	1.16519	1	1.06008	1.03683	0.17319	0.15121	0.15731	0.15729	0.17865	0.15828	0.17514	0.16684	0.11101	0.11101	0.11101	0.11101	0.04982	0.04982	0.04982	0.04982	0.17393	0.17393	0.17393	0.17393	0.9261	0.8338	0.8395	0.0739	0.2961	0.3489	0.1662	0.7039	0.5941	0.1605	0.6511	0.4059	0.23	0.21	TRUE	6.61466
3nc415_110_2226	NCU00070.2	1.0674	1	1.20872	1.19394	0.32139	0.30228	0.39228	0.40902	0.40148	0.35543	0.45022	0.41479	0.15394	0.15394	0.15394	0.15394	0.09653	0.09653	0.09653	0.09653	0.49919	0.49919	0.49919	0.49919	0.6884	0.2414	0.2858	0.3116	0.1801	0.1835	0.7586	0.8199	0.5378	0.7142	0.8165	0.4622	0.37	0.35	TRUE	5.16769
3nc415_240_928	NCU00083.2	1.41605	1	1.164	1.0244	0.16752	0.13102	0.15892	0.15508	0.16368	0.13848	0.18028	0.17253	0.0859	0.0859	0.0859	0.0859	0.04178	0.04178	0.04178	0.04178	0.17037	0.17037	0.17037	0.17037	0.9941	0.9693	0.986	0.0059	0.0741	0.3795	0.0307	0.9259	0.892	0.014	0.6205	0.108	0.2	0.18	TRUE	8.66431
3nc420_060_1630	NCU00089.2	1.03774	1	1.13943	1.02277	0.11118	0.11007	0.12375	0.11007	0.11702	0.11987	0.12457	0.11835	0.07792	0.07792	0.07792	0.07792	0.03501	0.03501	0.03501	0.03501	0.12421	0.12421	0.12421	0.12421	0.7089	0.1047	0.5745	0.2911	0.0808	0.3709	0.8953	0.9192	0.9203	0.4255	0.6291	0.0797	0.17	0.15	TRUE	10.014
3nc420_080_3499	NCU00091.2	1.19605	1	1.10544	1.00251	0.28992	0.25884	0.27395	0.25556	0.32932	0.30312	0.32434	0.3072	0.2103	0.2103	0.2103	0.2103	0.09	0.09	0.09	0.09	0.25798	0.25798	0.25798	0.25798	0.8364	0.6678	0.7962	0.1636	0.3167	0.4982	0.3322	0.6833	0.6978	0.2038	0.5018	0.3022	0.39	0.34	TRUE	2.70894
3nc420_090_541	NCU00092.2	1.23052	1	1.04278	1.03584	0.44162	0.33901	0.46333	0.39875	0.51664	0.38803	0.57851	0.49027	0.26248	0.26248	0.26248	0.26248	0.13175	0.13175	0.13175	0.13175	0.46672	0.46672	0.46672	0.46672	0.8059	0.706	0.7252	0.1941	0.4527	0.4549	0.294	0.5473	0.4951	0.2748	0.5451	0.5049	0.48	0.45	TRUE	0.898082
3nc420_100_297	NCU00093.2	1.08294	1	1.17895	1.02917	0.11577	0.11044	0.12101	0.11327	0.12339	0.1167	0.12699	0.11506	0.07979	0.07979	0.07979	0.07979	0.03509	0.03509	0.03509	0.03509	0.1185	0.1185	0.1185	0.1185	0.8617	0.1226	0.7308	0.1383	0.0396	0.3357	0.8774	0.9604	0.9548	0.2692	0.6643	0.0452	0.18	0.15	TRUE	9.64762
3nc420_230_595	NCU00107.2	1.08571	1	1.12247	1.01358	0.17079	0.1658	0.1806	0.16756	0.19016	0.18802	0.19206	0.1877	0.12743	0.12743	0.12743	0.12743	0.05659	0.05659	0.05659	0.05659	0.17597	0.17597	0.17597	0.17597	0.7664	0.3721	0.713	0.2336	0.1917	0.4496	0.6279	0.8083	0.8183	0.287	0.5504	0.1817	0.26	0.23	TRUE	6.2338
3nc420_340_1634	NCU00117.2	1.31929	1	1.03821	1.08009	0.14271	0.09836	0.11804	0.10665	0.1442	0.10175	0.12329	0.1165	0.06186	0.06186	0.06186	0.06186	0.03055	0.03055	0.03055	0.03055	0.13423	0.13423	0.13423	0.13423	0.9961	0.9859	0.9763	0.0039	0.2978	0.109	0.0141	0.7022	0.2362	0.0237	0.891	0.7638	0.15	0.4	TRUE	10.779
3nc420_370_3314	NCU00120.2	1.33	1	1.61343	1.22049	0.47809	0.39931	0.67466	0.51711	0.57377	0.51604	0.75557	0.79703	0.32179	0.32179	0.32179	0.32179	0.14457	0.14457	0.14457	0.14457	0.41706	0.41706	0.41706	0.41706	0.8303	0.2583	0.5898	0.1697	0.107	0.2322	0.7417	0.893	0.7591	0.4102	0.7678	0.2409	0.17	0.49	TRUE	-1.24508
3nc420_390_1121	NCU00122.2	2.18188	1	1.63489	1.53569	0.45784	0.22922	0.32804	0.34285	0.43219	0.27564	0.39262	0.4062	0.17081	0.17081	0.17081	0.17081	0.07504	0.07504	0.07504	0.07504	0.22222	0.22222	0.22222	0.22222	0.9993	0.9536	0.9546	0.0007	0.012	0.0132	0.0464	0.988	0.6633	0.0454	0.9868	0.3367	0.31	0.29	TRUE	3.63879
3nc420_400_537	NCU00123.2	1.36361	1	1.11608	1.13115	0.524	0.38967	0.4319	0.43999	0.55812	0.51785	0.56298	0.5387	0.27796	0.27796	0.27796	0.27796	0.14026	0.14026	0.14026	0.14026	0.43353	0.43353	0.43353	0.43353	0.8807	0.7504	0.722	0.1193	0.3679	0.3329	0.2496	0.6321	0.4816	0.278	0.6671	0.5184	0.5	0.47	TRUE	1.737
3nc420_410_4513	NCU00124.2	1.71589	1	1.22245	1.04783	0.36134	0.22615	0.2888	0.24962	0.337	0.27492	0.32362	0.31177	0.18196	0.18196	0.18196	0.18196	0.07905	0.07905	0.07905	0.07905	0.23635	0.23635	0.23635	0.23635	0.9922	0.9653	0.9805	0.0078	0.1452	0.3761	0.0347	0.8548	0.8135	0.0195	0.6239	0.1865	0.34	0.31	TRUE	2.95965
3nc425_040_1297	NCU00130.2	177.159	1	294.441	2.7423	49.8453	0.36353	53.2211	0.95225	53.0493	0.78336	49.8338	2.33674	0.22094	0.22094	0.22094	0.22094	0.10517	0.10517	0.10517	0.10517	0.37036	0.37036	0.37036	0.37036	1	0.0171	1	0	0	0.0041	0.9829	1	1	0	0.9959	0	0.16	0.39	TRUE	-0.28499
3nc425_100_2064	NCU10613.2a	1.05307	1	1.1135	1.04771	0.23704	0.2334	0.26778	0.24599	0.27788	0.26719	0.2771	0.29776	0.19051	0.19051	0.19051	0.19051	0.08075	0.08075	0.08075	0.08075	0.24104	0.24104	0.24104	0.24104	0.6275	0.361	0.5119	0.3725	0.2901	0.3887	0.639	0.7099	0.6351	0.4881	0.6113	0.3649	0.36	0.32	TRUE	3.2634
3nc425_120_2050	NCU00138.2	1.09269	1	1.17113	1.02794	0.24384	0.26015	0.26457	0.2584	0.27227	0.3016	0.28839	0.29872	0.16912	0.16912	0.16912	0.16912	0.08142	0.08142	0.08142	0.08142	0.26865	0.26865	0.26865	0.26865	0.7238	0.3228	0.6395	0.2762	0.2027	0.4338	0.6772	0.7973	0.8015	0.3605	0.5662	0.1985	0.35	0.31	TRUE	4.35665
3nc430_090_1601	NCU00153.2	1.43255	1	1.01477	1.06811	0.38555	0.26944	0.30363	0.32198	0.36105	0.31418	0.3577	0.42012	0.20444	0.20444	0.20444	0.20444	0.09791	0.09791	0.09791	0.09791	0.32006	0.32006	0.32006	0.32006	0.9512	0.9468	0.8814	0.0488	0.4753	0.3544	0.0532	0.5247	0.4034	0.1186	0.6456	0.5966	0.39	0.36	TRUE	1.56649
3nc430_160_2609	NCU00161.2	1.05014	1	1.10517	1.0092	0.18389	0.17864	0.19525	0.18046	0.20104	0.20001	0.20321	0.18932	0.13432	0.13432	0.13432	0.13432	0.06008	0.06008	0.06008	0.06008	0.18987	0.18987	0.18987	0.18987	0.6693	0.334	0.6146	0.3307	0.2292	0.4626	0.666	0.7708	0.7763	0.3854	0.5374	0.2237	0.28	0.24	TRUE	6.17874
3nc430_170_1226	NCU00162.2	1.07473	1	1.11417	1.0189	0.1506	0.13799	0.14756	0.14167	0.15597	0.1472	0.16361	0.15121	0.1032	0.1032	0.1032	0.1032	0.04562	0.04562	0.04562	0.04562	0.15233	0.15233	0.15233	0.15233	0.7814	0.3425	0.6932	0.2186	0.1584	0.4127	0.6575	0.8416	0.8348	0.3068	0.5873	0.1652	0.22	0.19	TRUE	6.72368
3nc430_220_139	NCU00166.2	2.2763	1	1.51353	1.00499	0.61711	0.34477	0.43281	0.34705	0.56826	0.48787	0.4721	0.51763	0.23449	0.23449	0.23449	0.23449	0.10849	0.10849	0.10849	0.10849	0.35949	0.35949	0.35949	0.35949	0.9935	0.9552	0.987	0.0065	0.0777	0.4995	0.0448	0.9223	0.9455	0.013	0.5005	0.0545	0.41	0.4	TRUE	1.94799
3nc435_030_661	NCU00173.2	1.23753	1	1.26168	1.07022	0.25396	0.21365	0.25525	0.22875	0.2743	0.2494	0.28169	0.26445	0.16315	0.16315	0.16315	0.16315	0.0729	0.0729	0.0729	0.0729	0.22312	0.22312	0.22312	0.22312	0.9166	0.4375	0.7979	0.0834	0.0923	0.3068	0.5625	0.9077	0.8602	0.2021	0.6932	0.1398	0.32	0.29	TRUE	4.67489
3nc435_090_106	NCU00178.2	1.0854	1	1.01521	1.08204	0.20989	0.17597	0.19919	0.18701	0.2355	0.18589	0.22431	0.1968	0.12235	0.12235	0.12235	0.12235	0.05923	0.05923	0.05923	0.05923	0.21733	0.21733	0.21733	0.21733	0.7703	0.6946	0.5111	0.2297	0.4532	0.2409	0.3054	0.5468	0.281	0.4889	0.7591	0.719	0.27	0.25	TRUE	5.96277
3nc435_140_1015	NCU00184.2	1.07978	1	1.15492	1.03874	0.20083	0.19035	0.22039	0.20342	0.22904	0.22382	0.22785	0.23186	0.15247	0.15247	0.15247	0.15247	0.06647	0.06647	0.06647	0.06647	0.20907	0.20907	0.20907	0.20907	0.7222	0.3041	0.6018	0.2778	0.1816	0.3843	0.6959	0.8184	0.7749	0.3982	0.6157	0.2251	0.3	0.27	TRUE	4.92436
3nc435_160_499	NCU00186.2	1.11646	1	1.21316	1.03292	0.15737	0.1541	0.17342	0.15588	0.17805	0.16953	0.1838	0.16788	0.1113	0.1113	0.1113	0.1113	0.04948	0.04948	0.04948	0.04948	0.16499	0.16499	0.16499	0.16499	0.8657	0.2036	0.7615	0.1343	0.0625	0.3628	0.7964	0.9375	0.9305	0.2385	0.6372	0.0695	0.23	0.21	TRUE	7.42765
3nc435_230_1726	NCU00195.2	1.25993	1	1.31402	1.18698	0.33883	0.28598	0.35766	0.3292	0.40497	0.36051	0.39906	0.40399	0.2341	0.2341	0.2341	0.2341	0.10054	0.10054	0.10054	0.10054	0.28615	0.28615	0.28615	0.28615	0.8672	0.4145	0.598	0.1328	0.1378	0.21	0.5855	0.8622	0.6819	0.402	0.79	0.3181	0.42	0.38	TRUE	-1.58541
3nc440_020_5202	NCU00199.2	1.21021	1	1.02147	1.23554	0.26979	0.23854	0.2339	0.28135	0.29229	0.2571	0.27064	0.31008	0.18086	0.18086	0.18086	0.18086	0.07814	0.07814	0.07814	0.07814	0.22617	0.22617	0.22617	0.22617	0.8799	0.8492	0.4557	0.1201	0.454	0.1019	0.1508	0.546	0.127	0.5443	0.8981	0.873	0.35	0.31	TRUE	2.19916
3nc440_170_267	NCU00214.2	1.18676	1	1.24137	1.38494	0.17074	0.14969	0.17093	0.1916	0.18771	0.16921	0.18282	0.19745	0.10753	0.10753	0.10753	0.10753	0.04732	0.04732	0.04732	0.04732	0.15993	0.15993	0.15993	0.15993	0.9433	0.3112	0.0963	0.0567	0.0462	0.0082	0.6888	0.9538	0.1354	0.9037	0.9918	0.8646	0.23	0.2	TRUE	6.6023
3nc440_180_801	NCU00215.2	1.071	1	1.11235	1.07447	0.23429	0.22664	0.23679	0.23766	0.24986	0.25959	0.2774	0.27329	0.17912	0.17912	0.17912	0.17912	0.07668	0.07668	0.07668	0.07668	0.23331	0.23331	0.23331	0.23331	0.6706	0.3993	0.4897	0.3294	0.2809	0.3259	0.6007	0.7191	0.5852	0.5103	0.6741	0.4148	0.34	0.3	TRUE	3.7182
3nc440_220_221	NCU00218.2	1.36035	1	1.81138	1.67581	0.47995	0.40203	0.70151	0.7732	0.64428	0.62918	0.72484	0.93655	0.28443	0.28443	0.28443	0.28443	0.14199	0.14199	0.14199	0.14199	0.47277	0.47277	0.47277	0.47277	0.8751	0.1506	0.2854	0.1249	0.061	0.0972	0.8494	0.939	0.6098	0.7146	0.9028	0.3902	0.49	0.48	TRUE	1.31031
3nc440_270_600	NCU00223.2	1.53199	1	1.01431	1.07144	0.19457	0.13483	0.14666	0.14753	0.18453	0.15307	0.14781	0.16898	0.09889	0.09889	0.09889	0.09889	0.04439	0.04439	0.04439	0.04439	0.15713	0.15713	0.15713	0.15713	0.9969	0.9963	0.9885	0.0031	0.4422	0.217	0.0037	0.5578	0.2555	0.0115	0.783	0.7445	0.21	0.19	TRUE	8.20084
3nc440_300_1773	NCU00226.2	1.16117	1	1.25375	1.12663	0.13464	0.11893	0.14552	0.12532	0.13739	0.13962	0.14289	0.13958	0.0855	0.0855	0.0855	0.0855	0.03782	0.03782	0.03782	0.03782	0.13256	0.13256	0.13256	0.13256	0.9533	0.1691	0.6356	0.0467	0.0246	0.0793	0.8309	0.9754	0.8994	0.3644	0.9207	0.1006	0.19	0.17	TRUE	9.14658
3nc440_350_677	NCU00233.2	1.21054	1	1.5531	1.46961	0.46118	0.39316	0.60902	0.59671	0.67457	0.59014	0.60758	0.61698	0.26871	0.26871	0.26871	0.26871	0.13861	0.13861	0.13861	0.13861	0.51066	0.51066	0.51066	0.51066	0.7889	0.2052	0.2703	0.2111	0.1141	0.1226	0.7948	0.8859	0.5817	0.7297	0.8774	0.4183	0.48	0.46	TRUE	2.19056
3nc440_380_2425	NCU00235.2b	1.076	1	1.11163	1.02749	0.11562	0.10943	0.11292	0.10694	0.11783	0.10765	0.12722	0.11415	0.07722	0.07722	0.07722	0.07722	0.03518	0.03518	0.03518	0.03518	0.11983	0.11983	0.11983	0.11983	0.853	0.3007	0.7317	0.147	0.1022	0.3293	0.6993	0.8978	0.8651	0.2683	0.6707	0.1349	0.17	0.38	TRUE	10.2116
3nc440_470_763	NCU00244.2	1.11107	1	1.27777	1.00755	0.28668	0.25682	0.34272	0.2858	0.30599	0.29808	0.39992	0.3619	0.18991	0.18991	0.18991	0.18991	0.0915	0.0915	0.0915	0.0915	0.29835	0.29835	0.29835	0.29835	0.7278	0.2144	0.6727	0.2722	0.1331	0.4802	0.7856	0.8669	0.858	0.3273	0.5198	0.142	0.37	0.34	TRUE	3.86546
3nc440_480_528	NCU00245.2	1.02347	1	1.05405	1.02551	0.24551	0.23889	0.26833	0.2603	0.29272	0.27198	0.3071	0.29566	0.20054	0.20054	0.20054	0.20054	0.0866	0.0866	0.0866	0.0866	0.24253	0.24253	0.24253	0.24253	0.5568	0.4348	0.4937	0.4432	0.3951	0.4395	0.5652	0.6049	0.5612	0.5063	0.5605	0.4388	0.37	0.34	TRUE	2.84784
3nc440_540_2794	NCU00251.2	1.10614	1	1.18169	1.05042	0.12264	0.13118	0.13451	0.13817	0.13301	0.13892	0.13767	0.13531	0.07376	0.07376	0.07376	0.07376	0.03668	0.03668	0.03668	0.03668	0.15308	0.15308	0.15308	0.15308	0.9121	0.1739	0.7417	0.0879	0.053	0.2862	0.8261	0.947	0.9352	0.2583	0.7138	0.0648	0.18	0.16	TRUE	9.97513
3nc440_660_2547	NCU00263.2	2.49993	1	1.24163	2.36556	0.45534	0.20887	0.25875	0.44888	0.46713	0.25868	0.2987	0.48273	0.1533	0.1533	0.1533	0.1533	0.06606	0.06606	0.06606	0.06606	0.21017	0.21017	0.21017	0.21017	0.9993	0.9991	0.6432	0.0007	0.096	0.0005	0.0009	0.904	0.0016	0.3568	0.9995	0.9984	0.27	0.27	TRUE	4.3309
3nc440_680_738	NCU00265.2	1.21228	1	1.05152	2.28481	0.36177	0.2768	0.27572	0.51662	0.4521	0.3772	0.34899	0.45635	0.19723	0.19723	0.19723	0.19723	0.09373	0.09373	0.09373	0.09373	0.30834	0.30834	0.30834	0.30834	0.8091	0.7852	0.0149	0.1909	0.4001	0.0025	0.2148	0.5999	0.0029	0.9851	0.9975	0.9971	0.36	0.35	TRUE	1.44778
3nc440_720_1889	NCU00269.2	1.12617	1	1.61209	1.28678	0.26467	0.22397	0.3588	0.27172	0.31812	0.27129	0.37316	0.28088	0.1524	0.1524	0.1524	0.1524	0.07255	0.07255	0.07255	0.07255	0.25484	0.25484	0.25484	0.25484	0.8067	0.0415	0.2128	0.1933	0.0209	0.0611	0.9585	0.9791	0.9254	0.7872	0.9389	0.0746	0.31	0.29	TRUE	4.50484
3nc440_730_1040	NCU00270.2	1.06813	1	1.05991	1.09644	0.14135	0.1351	0.14571	0.15308	0.1552	0.14288	0.15753	0.15223	0.1029	0.1029	0.1029	0.1029	0.04616	0.04616	0.04616	0.04616	0.15376	0.15376	0.15376	0.15376	0.766	0.5321	0.404	0.234	0.2841	0.1582	0.4679	0.7159	0.3526	0.596	0.8418	0.6474	0.22	0.2	TRUE	7.85547
3nc440_750_2652	NCU00272.2	1.29764	1	1.31888	1.06794	0.19	0.15758	0.19251	0.17157	0.20227	0.17643	0.20146	0.19433	0.11572	0.11572	0.11572	0.11572	0.05128	0.05128	0.05128	0.05128	0.1728	0.1728	0.1728	0.1728	0.9797	0.4327	0.9257	0.0203	0.0285	0.2581	0.5673	0.9715	0.9556	0.0743	0.7419	0.0444	0.24	0.21	TRUE	6.77851
3nc440_790_4195	NCU00276.2	1.06546	1	1.13631	1.16012	0.19016	0.18066	0.23379	0.24736	0.21202	0.20792	0.2451	0.2653	0.12965	0.12965	0.12965	0.12965	0.06279	0.06279	0.06279	0.06279	0.23621	0.23621	0.23621	0.23621	0.7121	0.2828	0.2757	0.2879	0.1925	0.1266	0.7172	0.8075	0.4428	0.7243	0.8734	0.5572	0.28	0.26	TRUE	6.01217
3nc440_840_3692	NCU00281.2	1.06073	1	1.10155	1.05522	0.28137	0.26941	0.31149	0.31302	0.30438	0.31937	0.37829	0.37192	0.19902	0.19902	0.19902	0.19902	0.09347	0.09347	0.09347	0.09347	0.31293	0.31293	0.31293	0.31293	0.6383	0.4086	0.5146	0.3617	0.3235	0.3861	0.5914	0.6765	0.5802	0.4854	0.6139	0.4198	0.39	0.35	TRUE	3.02646
3nc442_130_658	NCU00299.2	2.34695	1	2.53827	5.763	0.84303	0.35941	0.80391	1.54031	1.27664	0.60532	1.04278	1.29987	0.28252	0.28252	0.28252	0.28252	0.11926	0.11926	0.11926	0.11926	0.32748	0.32748	0.32748	0.32748	0.9978	0.3801	0.0111	0.0022	0.0055	0.0006	0.6199	0.9945	0.0033	0.9889	0.9994	0.9967	0.38	0.43	TRUE	-0.978732
3nc442_140_354	NCU00300.2	1.07599	1	1.15178	1.08538	0.23647	0.22704	0.25377	0.24476	0.26125	0.25932	0.26761	0.27559	0.17928	0.17928	0.17928	0.17928	0.0771	0.0771	0.0771	0.0771	0.23478	0.23478	0.23478	0.23478	0.685	0.3253	0.4842	0.315	0.2187	0.2949	0.6747	0.7813	0.6539	0.5158	0.7051	0.3461	0.34	0.31	TRUE	3.82049
3nc442_200_955	NCU00305.2	1.23569	1	1.07539	1.0093	0.26205	0.22828	0.24654	0.23429	0.29028	0.26386	0.28128	0.26805	0.18318	0.18318	0.18318	0.18318	0.08051	0.08051	0.08051	0.08051	0.23569	0.23569	0.23569	0.23569	0.8905	0.8016	0.8495	0.1095	0.3467	0.4732	0.1984	0.6533	0.6495	0.1505	0.5268	0.3505	0.35	0.31	TRUE	3.84548
3nc442_210_840	NCU00306.2	1.16077	1	1.09158	1.07368	0.26153	0.2315	0.24615	0.25468	0.27969	0.27334	0.26976	0.28484	0.18243	0.18243	0.18243	0.18243	0.08035	0.08035	0.08035	0.08035	0.2346	0.2346	0.2346	0.2346	0.8238	0.6602	0.671	0.1762	0.3145	0.3244	0.3398	0.6855	0.5553	0.329	0.6756	0.4447	0.35	0.31	TRUE	2.85284
3nc442_230_1996	NCU00308.2	1.14487	1	1.31642	1.02903	0.31093	0.28972	0.41384	0.32609	0.34965	0.3696	0.43967	0.44373	0.22528	0.22528	0.22528	0.22528	0.10346	0.10346	0.10346	0.10346	0.33325	0.33325	0.33325	0.33325	0.7512	0.2376	0.67	0.2488	0.1487	0.4412	0.7624	0.8513	0.8286	0.33	0.5588	0.1714	0.43	0.39	TRUE	2.4449
3nc442_260_1724	NCU00311.2	1.21647	1	1.16865	1.03994	0.26887	0.2286	0.24917	0.24186	0.28435	0.26773	0.29336	0.28173	0.18329	0.18329	0.18329	0.18329	0.07944	0.07944	0.07944	0.07944	0.24763	0.24763	0.24763	0.24763	0.885	0.6085	0.7997	0.115	0.1982	0.4018	0.3915	0.8018	0.7642	0.2003	0.5982	0.2358	0.35	0.31	TRUE	3.49786
3nc442_290_1047	NCU00313.2	1.08804	1	1.05286	1.08118	0.21366	0.18918	0.21108	0.22172	0.22823	0.22768	0.23221	0.23614	0.1592	0.1592	0.1592	0.1592	0.06959	0.06959	0.06959	0.06959	0.20813	0.20813	0.20813	0.20813	0.7375	0.5943	0.5156	0.2625	0.3644	0.2895	0.4057	0.6356	0.4273	0.4844	0.7105	0.5727	0.31	0.28	TRUE	4.75482
3nc442_400_2255	NCU00324.2	1.11586	1	1.25191	1.06472	0.21457	0.20322	0.24064	0.21708	0.23511	0.22733	0.24772	0.23513	0.1551	0.1551	0.1551	0.1551	0.06791	0.06791	0.06791	0.06791	0.20877	0.20877	0.20877	0.20877	0.7934	0.2037	0.6294	0.2066	0.0972	0.3271	0.7963	0.9028	0.8679	0.3706	0.6729	0.1321	0.31	0.27	TRUE	4.97652
3nc442_550_1875	NCU00340.2	1.22514	1	1.08537	1.05875	0.20105	0.16752	0.1867	0.19079	0.22193	0.19466	0.2012	0.19572	0.13364	0.13364	0.13364	0.13364	0.0586	0.0586	0.0586	0.0586	0.18158	0.18158	0.18158	0.18158	0.9374	0.8449	0.8514	0.0626	0.2669	0.3094	0.1551	0.7331	0.5821	0.1486	0.6906	0.4179	0.27	0.24	TRUE	5.93941
3nc442_750_2206	NCU00363.2	1.42136	1	1.14027	1.07831	0.45463	0.28941	0.39027	0.32933	0.47526	0.38262	0.4291	0.39685	0.14351	0.14351	0.14351	0.14351	0.09041	0.09041	0.09041	0.09041	0.49579	0.49579	0.49579	0.49579	0.9318	0.8762	0.8906	0.0682	0.2443	0.2817	0.1238	0.7557	0.6387	0.1094	0.7183	0.3613	0.36	0.34	TRUE	6.27761
3nc450_040_331	NCU00369.2	1.0702	1	1.09549	1.072	0.22458	0.21413	0.24149	0.23111	0.25543	0.24543	0.25196	0.26014	0.17081	0.17081	0.17081	0.17081	0.07335	0.07335	0.07335	0.07335	0.23902	0.23902	0.23902	0.23902	0.6843	0.4347	0.5005	0.3157	0.2942	0.3157	0.5653	0.7058	0.5554	0.4995	0.6843	0.4446	0.33	0.3	TRUE	4.17485
3nc450_130_1391	NCU00378.2	1.21984	1	1.20491	1.03441	0.17243	0.15071	0.18154	0.16407	0.19208	0.17628	0.19239	0.17307	0.1146	0.1146	0.1146	0.1146	0.0504	0.0504	0.0504	0.0504	0.16442	0.16442	0.16442	0.16442	0.9585	0.5485	0.9041	0.0415	0.0751	0.3733	0.4515	0.9249	0.9177	0.0959	0.6267	0.0823	0.24	0.21	TRUE	7.0874
3nc450_150_856	NCU00380.2	1.39234	1	1.05604	1.03313	0.3825	0.26294	0.31703	0.28152	0.41274	0.30842	0.38387	0.33415	0.20301	0.20301	0.20301	0.20301	0.09498	0.09498	0.09498	0.09498	0.31744	0.31744	0.31744	0.31744	0.9483	0.8765	0.8944	0.0517	0.4064	0.4325	0.1235	0.5936	0.5448	0.1056	0.5675	0.4552	0.39	0.36	TRUE	2.5804
3nc450_160_581	NCU00381.2a	2.61536	1	4.85011	1.36216	0.60764	0.26982	0.83112	0.36153	0.66755	0.41042	0.68509	0.47552	0.16403	0.16403	0.16403	0.16403	0.07886	0.07886	0.07886	0.07886	0.27055	0.27055	0.27055	0.27055	0.9992	0.0047	0.9919	0.0008	0.0002	0.0679	0.9953	0.9998	0.9997	0.0081	0.9321	0.0003	0.27	0.31	TRUE	3.60715
3nc450_180_1856	NCU00382.2	1.01307	1	1.09647	1.02614	0.25277	0.22441	0.25839	0.22183	0.28207	0.24386	0.30781	0.24408	0.15784	0.15784	0.15784	0.15784	0.07574	0.07574	0.07574	0.07574	0.27023	0.27023	0.27023	0.27023	0.5372	0.3192	0.4653	0.4628	0.2923	0.4175	0.6808	0.7077	0.6808	0.5347	0.5825	0.3192	0.33	0.3	TRUE	4.0775
3nc450_260_5	NCU00391.2	1.19772	1	1.04043	1.05335	0.13859	0.12888	0.12841	0.13366	0.15281	0.1349	0.13171	0.1273	0.09213	0.09213	0.09213	0.09213	0.04072	0.04072	0.04072	0.04072	0.1374	0.1374	0.1374	0.1374	0.9677	0.9433	0.9139	0.0323	0.327	0.2572	0.0567	0.673	0.4422	0.0861	0.7428	0.5578	0.2	0.18	TRUE	8.11731
3nc450_370_998	NCU00401.2	1.05692	1	1.04872	1.00096	0.15751	0.15818	0.14886	0.13992	0.16354	0.15724	0.16434	0.15964	0.11303	0.11303	0.11303	0.11303	0.05112	0.05112	0.05112	0.05112	0.16939	0.16939	0.16939	0.16939	0.722	0.5312	0.6881	0.278	0.33	0.4868	0.4688	0.67	0.6819	0.3119	0.5132	0.3181	0.24	0.21	TRUE	5.98258
3nc450_420_1064	NCU00407.2	1.10919	1	1.20897	1.10798	0.12583	0.11589	0.13727	0.13198	0.13599	0.13226	0.1463	0.13698	0.08623	0.08623	0.08623	0.08623	0.03811	0.03811	0.03811	0.03811	0.12717	0.12717	0.12717	0.12717	0.9006	0.1405	0.5078	0.0994	0.0406	0.1109	0.8595	0.9594	0.866	0.4922	0.8891	0.134	0.19	0.16	TRUE	9.2194
3nc700_200_323	NCU08541.2	9.22719	1	4.89392	2.15084	1.59388	0.26681	1.05365	0.56798	1.24286	0.39467	1.23376	0.8775	0.18249	0.18249	0.18249	0.18249	0.0814	0.0814	0.0814	0.0814	0.2469	0.2469	0.2469	0.2469	1	0.9966	0.9999	0	0.0001	0.0013	0.0034	0.9999	0.998	0.0001	0.9987	0.002	0.23	0.31	TRUE	1.52442
3nc700_240_1818	NCU08545.2	1.05645	1	1.17803	1.09348	0.30033	0.29463	0.3411	0.30707	0.35385	0.36372	0.38239	0.35398	0.24165	0.24165	0.24165	0.24165	0.10362	0.10362	0.10362	0.10362	0.29605	0.29605	0.29605	0.29605	0.6087	0.295	0.4474	0.3913	0.2486	0.3199	0.705	0.7514	0.637	0.5526	0.6801	0.363	0.42	0.39	TRUE	1.60376
3nc700_290_686	NCU08549.2	1.11496	1	1.19089	1.01393	0.0772	0.07113	0.08202	0.07406	0.08204	0.0779	0.08029	0.07617	0.05198	0.05198	0.05198	0.05198	0.02349	0.02349	0.02349	0.02349	0.07966	0.07966	0.07966	0.07966	0.9715	0.0952	0.9443	0.0285	0.0101	0.3779	0.9048	0.9899	0.9925	0.0557	0.6221	0.0075	0.31	0.34	TRUE	13.0001
3nc700_340_478	NCU08554.2	2.25929	1	1.15961	1.23502	0.19225	0.10367	0.11387	0.12247	0.16516	0.1144	0.12502	0.14621	0.06851	0.06851	0.06851	0.06851	0.03054	0.03054	0.03054	0.03054	0.10726	0.10726	0.10726	0.10726	1	1	0.9999	0	0.0401	0.0076	0	0.9599	0.1573	0.0001	0.9924	0.8427	0.38	0.37	TRUE	10.8125
45b12_020_877	NCU05621.2	1.13582	1	1.0733	1.075	0.15625	0.13516	0.20213	0.20838	0.14545	0.13472	0.21246	0.23416	0.07087	0.07087	0.07087	0.07087	0.03927	0.03927	0.03927	0.03927	0.21775	0.21775	0.21775	0.21775	0.9289	0.786	0.712	0.0711	0.2421	0.1624	0.214	0.7579	0.4922	0.288	0.8376	0.5078	0.2	0.17	TRUE	9.58172
45b12_080_1165	NCU05615.2	1.1288	1	1.1474	1.03118	0.2306	0.20397	0.23333	0.22118	0.25099	0.23102	0.25234	0.25454	0.16406	0.16406	0.16406	0.16406	0.07143	0.07143	0.07143	0.07143	0.21882	0.21882	0.21882	0.21882	0.8085	0.4538	0.7114	0.1915	0.2079	0.417	0.5462	0.7921	0.7582	0.2886	0.583	0.2418	0.32	0.29	TRUE	4.3847
49d12_050_248	NCU04006.2	1.03728	1	1.12829	1.03422	0.18125	0.16936	0.21859	0.2001	0.19225	0.18675	0.23492	0.21807	0.11754	0.11754	0.11754	0.11754	0.05664	0.05664	0.05664	0.05664	0.22675	0.22675	0.22675	0.22675	0.6431	0.2165	0.5117	0.3569	0.1871	0.36654	0.7835	0.8129	0.7439	0.4883	0.63346	0.2561	0.27	0.24	TRUE	6.44238
49d12_100_2542	NCU10148.2	1.05693	1	1.12396	1.01736	0.2263	0.21687	0.23678	0.223	0.24496	0.25335	0.25623	0.2552	0.17336	0.17336	0.17336	0.17336	0.07535	0.07535	0.07535	0.07535	0.23109	0.23109	0.23109	0.23109	0.649	0.3352	0.5866	0.351	0.2525	0.4527	0.6648	0.7475	0.7414	0.4134	0.5473	0.2586	0.33	0.3	TRUE	3.90991
49d12_120_2468	NCU04014.2	1.09989	1	1.06248	1.03359	0.31435	0.26437	0.31025	0.27934	0.35322	0.28846	0.36463	0.31007	0.20342	0.20342	0.20342	0.20342	0.09629	0.09629	0.09629	0.09629	0.32716	0.32716	0.32716	0.32716	0.7063	0.5686	0.6135	0.2937	0.3889	0.422	0.4314	0.6111	0.5555	0.3865	0.578	0.4445	0.4	0.36	TRUE	2.67347
4nc137_120_1057	NCU09654.2	1.3046	1	1.11638	1.1454	0.49743	0.38098	0.50364	0.46199	0.60003	0.4744	0.64421	0.57245	0.30693	0.30693	0.30693	0.30693	0.15231	0.15231	0.15231	0.15231	0.4868	0.4868	0.4868	0.4868	0.8075	0.6891	0.6439	0.1925	0.3881	0.3107	0.3109	0.6119	0.4627	0.3561	0.6893	0.5373	0.22	0.17	TRUE	-0.476362
4nc137_140_1553	NCU09655.2b	1.05648	1	1.16675	1.00932	0.09458	0.09538	0.10442	0.09957	0.10302	0.09991	0.10882	0.09561	0.06675	0.06675	0.06675	0.06675	0.03028	0.03028	0.03028	0.03028	0.1138	0.1138	0.1138	0.1138	0.8233	0.0661	0.7562	0.1767	0.032	0.4314	0.9339	0.968	0.9744	0.2438	0.5686	0.0256	0.29	0.36	TRUE	10.621
4nc137_190_447	NCU09660.2	1.22959	1	1.23129	1.05518	0.27033	0.26038	0.26855	0.26642	0.29634	0.29652	0.28935	0.31035	0.16194	0.16194	0.16194	0.16194	0.07783	0.07783	0.07783	0.07783	0.28688	0.28688	0.28688	0.28688	0.9055	0.4946	0.803	0.0945	0.1305	0.3746	0.5054	0.8695	0.8486	0.197	0.6254	0.1514	0.34	0.3	TRUE	4.52096
4nc280_040_1760	NCU07901.2	1.15928	1	1.03365	1.10636	0.27042	0.23862	0.266	0.29563	0.30108	0.25816	0.33231	0.33498	0.18207	0.18207	0.18207	0.18207	0.08657	0.08657	0.08657	0.08657	0.27844	0.27844	0.27844	0.27844	0.8105	0.7516	0.5988	0.1895	0.4274	0.2657	0.2484	0.5726	0.3676	0.4012	0.7343	0.6324	0.36	0.33	TRUE	3.78461
4nc280_090_1877	NCU07905.2	1.11702	1	1.17152	1.03781	0.20476	0.18645	0.21287	0.19592	0.2145	0.21046	0.22683	0.22087	0.14636	0.14636	0.14636	0.14636	0.06452	0.06452	0.06452	0.06452	0.20143	0.20143	0.20143	0.20143	0.8082	0.3504	0.6957	0.1918	0.1451	0.3784	0.6496	0.8549	0.8285	0.3043	0.6216	0.1715	0.29	0.26	TRUE	5.35122
4nc280_160_248	NCU07912.2	1.14792	1	1.29046	1.06424	0.18966	0.16855	0.20369	0.18459	0.20665	0.19171	0.21453	0.19838	0.12953	0.12953	0.12953	0.12953	0.05732	0.05732	0.05732	0.05732	0.18207	0.18207	0.18207	0.18207	0.8777	0.1536	0.7214	0.1223	0.0437	0.2901	0.8464	0.9563	0.9345	0.2786	0.7099	0.0655	0.26	0.24	TRUE	4.83219
4nc280_210_38	NCU07917.2	1.42034	1	1.14888	1.03052	0.34578	0.26576	0.28742	0.26668	0.37605	0.31252	0.33858	0.32159	0.2094	0.2094	0.2094	0.2094	0.09147	0.09147	0.09147	0.09147	0.25307	0.25307	0.25307	0.25307	0.951	0.8694	0.9202	0.049	0.2537	0.4337	0.1306	0.7463	0.7283	0.0798	0.5663	0.2717	0.38	0.35	TRUE	1.81598
4nc280_280_3375	NCU07924.2	1.63347	1	2.41793	1.3808	0.42667	0.33005	0.56664	0.41194	0.48977	0.44368	0.55302	0.52886	0.20852	0.20852	0.20852	0.20852	0.09844	0.09844	0.09844	0.09844	0.32846	0.32846	0.32846	0.32846	0.9801	0.0382	0.7642	0.0199	0.005	0.1	0.9618	0.995	0.9873	0.2358	0.9	0.0127	0.38	0.37	TRUE	1.50436
4nc280_370_117	NCU10459.2b	2.09761	1	1.18204	1.00359	0.41509	0.23467	0.27838	0.24685	0.40061	0.28395	0.34279	0.30404	0.18572	0.18572	0.18572	0.18572	0.08035	0.08035	0.08035	0.08035	0.2451	0.2451	0.2451	0.2451	0.9984	0.9932	0.9963	0.0016	0.1872	0.4833	0.0068	0.8128	0.8312	0.0037	0.5167	0.1688	0.33	0.32	TRUE	2.64436
4nc280_450_1309	NCU07941.2	1.62986	1	1.80324	1.86219	0.20517	0.13116	0.2095	0.20894	0.20079	0.14641	0.20673	0.22801	0.089	0.089	0.089	0.089	0.04004	0.04004	0.04004	0.04004	0.14029	0.14029	0.14029	0.14029	0.9985	0.1072	0.0802	0.0015	0.0009	0.0007	0.8928	0.9991	0.335	0.9198	0.9993	0.665	0.19	0.17	TRUE	8.86481
4nc280_460_322	NCU07942.2	1.06863	1	1.17129	1.03874	0.14811	0.13714	0.1554	0.1409	0.1521	0.15033	0.16201	0.14804	0.09973	0.09973	0.09973	0.09973	0.04429	0.04429	0.04429	0.04429	0.14659	0.14659	0.14659	0.14659	0.7682	0.1542	0.6088	0.2318	0.0808	0.3293	0.8458	0.9192	0.8964	0.3912	0.6707	0.1036	0.21	0.19	TRUE	8.26827
4nc280_470_602	NCU07943.2	1.13404	1	1.22056	1.00088	0.19448	0.17532	0.20131	0.17795	0.2006	0.20618	0.21819	0.19998	0.13336	0.13336	0.13336	0.13336	0.06053	0.06053	0.06053	0.06053	0.18919	0.18919	0.18919	0.18919	0.8462	0.2611	0.8174	0.1538	0.087	0.4975	0.7389	0.913	0.9339	0.1826	0.5025	0.0661	0.27	0.24	TRUE	6.19339
4nc285_170_717	NCU07963.2	1.31291	1	1.50731	1.02187	0.30352	0.23377	0.3702	0.26809	0.30239	0.28386	0.38785	0.34637	0.16795	0.16795	0.16795	0.16795	0.08155	0.08155	0.08155	0.08155	0.26897	0.26897	0.26897	0.26897	0.938	0.1815	0.895	0.062	0.0381	0.4372	0.8185	0.9619	0.9562	0.105	0.5628	0.0438	0.34	0.31	TRUE	4.88274
4nc285_190_486	NCU07965.2	1.58644	1	1.63028	1.12595	0.21735	0.14894	0.21666	0.16202	0.20845	0.17314	0.21246	0.18538	0.10836	0.10836	0.10836	0.10836	0.04861	0.04861	0.04861	0.04861	0.15589	0.15589	0.15589	0.15589	0.9988	0.3828	0.9895	0.0012	0.0018	0.1148	0.6172	0.9982	0.9954	0.0105	0.8852	0.0046	0.22	0.2	TRUE	7.18361
4nc310_020_185	NCU06524.2	1.64018	1	1.52148	1.20898	0.35113	0.23858	0.34416	0.28599	0.36298	0.28711	0.36282	0.33726	0.18601	0.18601	0.18601	0.18601	0.08166	0.08166	0.08166	0.08166	0.24555	0.24555	0.24555	0.24555	0.9892	0.6738	0.9336	0.0108	0.0309	0.1251	0.3262	0.9691	0.9008	0.0664	0.8749	0.0992	0.34	0.32	TRUE	1.56394
4nc310_030_864	NCU06525.2	1.16391	1	1.0581	1.0195	0.21839	0.20345	0.20331	0.20572	0.24682	0.22217	0.22972	0.22234	0.15688	0.15688	0.15688	0.15688	0.06837	0.06837	0.06837	0.06837	0.20777	0.20777	0.20777	0.20777	0.8629	0.7578	0.7978	0.1371	0.3528	0.4437	0.2422	0.6472	0.6164	0.2022	0.5563	0.3836	0.31	0.28	TRUE	3.09614
4nc310_040_1502	NCU06526.2	1.06892	1	1.1443	1.0182	0.11689	0.11852	0.12325	0.11478	0.12342	0.1194	0.13078	0.12026	0.08322	0.08322	0.08322	0.08322	0.03716	0.03716	0.03716	0.03716	0.12548	0.12548	0.12548	0.12548	0.815	0.1839	0.727	0.185	0.077	0.3931	0.8161	0.923	0.9266	0.273	0.6069	0.0734	0.18	0.16	TRUE	8.73057
4nc310_090_1456	NCU06531.2	1.12761	1	1.07459	1.04899	0.31688	0.28477	0.33373	0.34535	0.34996	0.35061	0.40017	0.40336	0.22696	0.22696	0.22696	0.22696	0.10671	0.10671	0.10671	0.10671	0.33285	0.33285	0.33285	0.33285	0.7235	0.5931	0.6156	0.2765	0.3811	0.4134	0.4069	0.6189	0.5432	0.3844	0.5866	0.4568	0.43	0.39	TRUE	2.20625
4nc310_120_108	4nc310_120	1.42216	1	1.37683	1.14464	0.53639	0.35881	0.44953	0.36319	0.64377	0.43452	0.52494	0.42837	0.22969	0.22969	0.22969	0.22969	0.11751	0.11751	0.11751	0.11751	0.41701	0.41701	0.41701	0.41701	0.886	0.5528	0.7755	0.114	0.1263	0.2525	0.4472	0.8737	0.821	0.2245	0.7475	0.179	0.44	0.42	TRUE	1.75508
4nc320_080_1151	NCU06543.2	1.04106	1	1.05377	1.02755	0.11641	0.11167	0.12026	0.1136	0.12069	0.12166	0.1224	0.12217	0.08017	0.08017	0.08017	0.08017	0.03576	0.03576	0.03576	0.03576	0.13082	0.13082	0.13082	0.13082	0.7238	0.4324	0.5673	0.2762	0.262	0.3476	0.5676	0.738	0.641	0.4327	0.6524	0.359	0.18	0.16	TRUE	9.90775
4nc320_240_1263	NCU06560.2	1.64182	1	1.29311	1.1054	0.40144	0.27748	0.33748	0.30977	0.42292	0.33133	0.39306	0.39193	0.22073	0.22073	0.22073	0.22073	0.09426	0.09426	0.09426	0.09426	0.26163	0.26163	0.26163	0.26163	0.9838	0.8867	0.9408	0.0162	0.1337	0.2944	0.1133	0.8663	0.7732	0.0592	0.7056	0.2268	0.39	0.36	TRUE	1.89322
4nc320_290_306	NCU06568.2	1.288	1	1.03143	1.0978	0.18586	0.1747	0.17961	0.20816	0.17987	0.1795	0.18277	0.22907	0.08076	0.08076	0.08076	0.08076	0.04378	0.04378	0.04378	0.04378	0.26095	0.26095	0.26095	0.26095	0.9796	0.972	0.9142	0.0204	0.3575	0.1739	0.028	0.6425	0.253	0.0858	0.8261	0.747	0.22	0.2	TRUE	8.86471
4nc325_140_469	NCU06586.2	1.27219	1	1.02588	1.06954	0.57823	0.48181	0.56514	0.71759	0.61883	0.62032	0.77917	1.06914	0.35155	0.35155	0.35155	0.35155	0.19158	0.19158	0.19158	0.19158	0.68631	0.68631	0.68631	0.68631	0.7471	0.7645	0.6333	0.2529	0.484	0.4455	0.2355	0.516	0.4776	0.3667	0.5545	0.5224	0.26	0.21	TRUE	0.483466
4nc330_160_3718	NCU06604.2	1.20863	1	1.25819	1.01194	0.33336	0.25426	0.34572	0.25552	0.38008	0.28114	0.40436	0.28859	0.18733	0.18733	0.18733	0.18733	0.08902	0.08902	0.08902	0.08902	0.30245	0.30245	0.30245	0.30245	0.8621	0.4178	0.8073	0.1379	0.1405	0.4741	0.5822	0.8595	0.8826	0.1927	0.5259	0.1174	0.37	0.34	TRUE	3.55391
4nc330_250_448	NCU06613.2	1.11122	1	1.03836	1.10024	0.13812	0.12638	0.12825	0.1348	0.14614	0.13207	0.14242	0.14324	0.09265	0.09265	0.09265	0.09265	0.04153	0.04153	0.04153	0.04153	0.13648	0.13648	0.13648	0.13648	0.8893	0.7891	0.5503	0.1107	0.3459	0.1304	0.2109	0.6541	0.2365	0.4497	0.8696	0.7635	0.2	0.18	TRUE	8.76449
4nc350_160_1631	NCU08307.2	1.2952	1	1.46314	1.10493	0.44058	0.38766	0.4951	0.45855	0.50761	0.57316	0.54748	0.60405	0.2973	0.2973	0.2973	0.2973	0.13367	0.13367	0.13367	0.13367	0.4026	0.4026	0.4026	0.4026	0.827	0.3187	0.6811	0.173	0.1318	0.372	0.6813	0.8682	0.835	0.3189	0.628	0.165	0.35	0.47	TRUE	-0.996479
4nc350_210_1248	NCU08312.2	1.52232	1	1.10274	1.44364	0.64619	0.42461	0.58083	0.84651	0.61637	0.53116	0.77156	1.17294	0.2638	0.2638	0.2638	0.2638	0.15178	0.15178	0.15178	0.15178	0.58202	0.58202	0.58202	0.58202	0.9201	0.8869	0.5617	0.0799	0.3919	0.1681	0.1131	0.6081	0.2905	0.4383	0.8319	0.7095	0.24	0.49	TRUE	2.69572
4nc350_380_448	NCU08330.2	1.9885	1	1.27244	3.01491	0.35785	0.18454	0.22933	0.45106	0.39163	0.21832	0.25166	0.44987	0.13085	0.13085	0.13085	0.13085	0.05779	0.05779	0.05779	0.05779	0.18233	0.18233	0.18233	0.18233	0.9995	0.9961	0.0104	0.0005	0.0608	0.0001	0.0039	0.9392	0	0.9896	0.9999	1	0.24	0.24	TRUE	4.47834
4nc400_020_285	NCU07661.2	1.55163	1	2.55345	1.16082	0.29573	0.19323	0.44128	0.2043	0.36017	0.23914	0.39492	0.23683	0.12007	0.12007	0.12007	0.12007	0.05724	0.05724	0.05724	0.05724	0.21765	0.21765	0.21765	0.21765	0.9936	0.0104	0.9667	0.0064	0.0013	0.1017	0.9896	0.9987	0.9993	0.0333	0.8983	0.0007	0.24	0.24	TRUE	4.79422
4nc400_100_1031	NCU07670.2	2.07872	1	4.45104	1.79888	1.12689	0.74126	1.82234	0.9989	2.04857	2.08163	1.55621	1.42845	0.49761	0.49761	0.49761	0.49761	0.22582	0.22582	0.22582	0.22582	0.69147	0.69147	0.69147	0.69147	0.8068	0.0649	0.5999	0.1932	0.0224	0.2037	0.9351	0.9776	0.9794	0.4001	0.7963	0.0206	0.19	0.22	TRUE	-7.66078
4nc400_180_1342	NCU07678.2	1.04622	1	1.14731	1.01434	0.12911	0.12859	0.1304	0.12839	0.14312	0.12832	0.15018	0.12888	0.09068	0.09068	0.09068	0.09068	0.04058	0.04058	0.04058	0.04058	0.1391	0.1391	0.1391	0.1391	0.725	0.136	0.6398	0.275	0.0824	0.4233	0.864	0.9176	0.9272	0.3602	0.5767	0.0728	0.2	0.17	TRUE	8.87232
4nc400_230_745	4nc400_230	1.21772	1	1.09949	1.002	0.1904	0.16755	0.15954	0.14791	0.20078	0.17751	0.16216	0.15581	0.09734	0.09734	0.09734	0.09734	0.04879	0.04879	0.04879	0.04879	0.19318	0.19318	0.19318	0.19318	0.9384	0.8594	0.9407	0.0616	0.1918	0.4938	0.1406	0.8082	0.8518	0.0593	0.5062	0.1482	0.23	0.2	TRUE	7.71307
4nc400_300_2135	NCU07686.2b	1.45214	1	1.05506	2.45653	0.58453	0.49225	0.4247	1.55595	0.86789	1.11528	0.68193	1.12331	0.27059	0.27059	0.27059	0.27059	0.15738	0.15738	0.15738	0.15738	0.6389	0.6389	0.6389	0.6389	0.8831	0.8852	0.1608	0.1169	0.4167	0.0998	0.1148	0.5833	0.064	0.8392	0.9002	0.936	0.48	0.5	TRUE	3.05948
4nc410_030_739	NCU07694.2	1.46948	1	1.56153	1.4743	0.36917	0.29185	0.42903	0.4768	0.39611	0.37334	0.45918	0.58245	0.17102	0.17102	0.17102	0.17102	0.09102	0.09102	0.09102	0.09102	0.3815	0.3815	0.3815	0.3815	0.9675	0.3448	0.4936	0.0325	0.044	0.058	0.6552	0.956	0.6199	0.5064	0.942	0.3801	0.37	0.35	TRUE	4.76258
4nc410_120_1954	NCU07705.2	6.20015	1	7.19991	1.79994	1.13583	0.25024	1.19719	0.4356	1.1089	0.36034	1.15101	0.58965	0.1594	0.1594	0.1594	0.1594	0.07016	0.07016	0.07016	0.07016	0.2271	0.2271	0.2271	0.2271	1	0.1468	0.9999	0	0	0.0036	0.8532	1	0.9999	0.0001	0.9964	0.0001	0.21	0.29	TRUE	4.40644
4nc448_010_193	NCU04537.2	1.40307	1	1.0311	2.62078	0.44967	0.33068	0.33577	0.69245	0.57541	0.44742	0.46232	0.66585	0.26901	0.26901	0.26901	0.26901	0.11585	0.11585	0.11585	0.11585	0.30491	0.30491	0.30491	0.30491	0.9085	0.8975	0.0244	0.0915	0.4507	0.002	0.1025	0.5493	0.0027	0.9756	0.998	0.9973	0.41	0.41	TRUE	0.91504
4nc450_100_6015	NCU04512.2	1.19655	1	1.13691	1.01832	0.28865	0.24171	0.30869	0.29895	0.30396	0.29693	0.36124	0.33505	0.18886	0.18886	0.18886	0.18886	0.0876	0.0876	0.0876	0.0876	0.3071	0.3071	0.3071	0.3071	0.8453	0.6171	0.7812	0.1547	0.2686	0.4674	0.3829	0.7314	0.6996	0.2188	0.5326	0.3004	0.38	0.34	TRUE	3.13808
4nc450_120_4062	NCU04514.2	1.03735	1	1.18083	1.05252	0.25027	0.24898	0.28951	0.26662	0.29217	0.29426	0.32492	0.30196	0.20388	0.20388	0.20388	0.20388	0.08927	0.08927	0.08927	0.08927	0.25254	0.25254	0.25254	0.25254	0.5866	0.2299	0.4757	0.4134	0.218	0.3916	0.7701	0.782	0.739	0.5243	0.6084	0.261	0.38	0.34	TRUE	2.92876
4nc450_170_164	NCU04519.2	1.44328	1	1.66305	1.02441	0.2962	0.22633	0.31762	0.22334	0.32097	0.26305	0.3509	0.26999	0.1683	0.1683	0.1683	0.1683	0.07257	0.07257	0.07257	0.07257	0.22752	0.22752	0.22752	0.22752	0.9777	0.1735	0.9586	0.0223	0.0092	0.4262	0.8265	0.9908	0.9918	0.0414	0.5738	0.0082	0.32	0.29	TRUE	3.69479
4nc450_190_661	NCU04521.2	5.99477	1	3.91714	1.58841	0.89515	0.23679	0.67759	0.35229	0.78736	0.30823	0.74945	0.48308	0.15425	0.15425	0.15425	0.15425	0.06772	0.06772	0.06772	0.06772	0.20746	0.20746	0.20746	0.20746	1	0.9897	0.9998	0	0	0.0071	0.0103	1	0.9994	0.0002	0.9929	0.0006	0.22	0.27	TRUE	4.12134
4nc452_060_201	NCU04466.2	1.22355	1	1.16226	1.29729	0.48799	0.30895	0.47777	0.38313	0.62339	0.33256	0.57197	0.40676	0.19781	0.19781	0.19781	0.19781	0.10317	0.10317	0.10317	0.10317	0.4043	0.4043	0.4043	0.4043	0.8463	0.5673	0.4117	0.1537	0.2987	0.1165	0.4327	0.7013	0.2733	0.5883	0.8835	0.7267	0.41	0.38	TRUE	1.80594
4nc452_260_3	NCU04486.2	1.6296	1	1.39981	1.00087	0.49821	0.29471	0.52044	0.3206	0.50212	0.37911	0.56643	0.46387	0.21312	0.21312	0.21312	0.21312	0.11051	0.11051	0.11051	0.11051	0.38429	0.38429	0.38429	0.38429	0.9679	0.736	0.9464	0.0321	0.1183	0.4926	0.264	0.8817	0.8896	0.0536	0.5074	0.1104	0.42	0.4	TRUE	3.36108
4nc452_350_326	4nc452_350	1.06296	1	1.12849	1.07229	0.12181	0.11702	0.13065	0.12708	0.13099	0.13032	0.12765	0.13477	0.0862	0.0862	0.0862	0.0862	0.03832	0.03832	0.03832	0.03832	0.13036	0.13036	0.13036	0.13036	0.7839	0.2222	0.4613	0.2161	0.1028	0.1979	0.7778	0.8972	0.752	0.5387	0.8021	0.248	0.19	0.17	TRUE	9.03768
4nc452_380_201	NCU04494.2	1.81607	1	4.69973	1.1453	0.30903	0.21043	0.53174	0.21384	0.36729	0.28416	0.45561	0.27832	0.12812	0.12812	0.12812	0.12812	0.05657	0.05657	0.05657	0.05657	0.1864	0.1864	0.1864	0.1864	0.9985	0	0.9927	0.0015	0	0.1297	1	1	1	0.0073	0.8703	0	0.2	0.24	TRUE	5.028
4nc452_400_573	NCU04496.2	1.04808	1	1.1393	1.15069	0.15885	0.14618	0.17319	0.17108	0.17531	0.16167	0.17078	0.18116	0.11435	0.11435	0.11435	0.11435	0.05025	0.05025	0.05025	0.05025	0.16354	0.16354	0.16354	0.16354	0.6895	0.1989	0.2037	0.3105	0.1315	0.0901	0.8011	0.8685	0.4594	0.7963	0.9099	0.5406	0.24	0.21	TRUE	6.17342
4nc452_450_293	NCU04501.2	1.5498	1	1.48391	1.57024	0.30714	0.20885	0.30819	0.31358	0.33435	0.25935	0.31943	0.33139	0.15772	0.15772	0.15772	0.15772	0.06917	0.06917	0.06917	0.06917	0.22655	0.22655	0.22655	0.22655	0.9889	0.6306	0.4642	0.0111	0.0259	0.0104	0.3694	0.9741	0.343	0.5358	0.9896	0.657	0.31	0.28	TRUE	4.07571
4nc550_090_143	NCU07983.2	1.29735	1	1.16809	1.11874	0.26432	0.2475	0.24429	0.27662	0.29335	0.28096	0.25781	0.30528	0.15365	0.15365	0.15365	0.15365	0.07389	0.07389	0.07389	0.07389	0.27286	0.27286	0.27286	0.27286	0.9429	0.7793	0.8032	0.0571	0.1772	0.2465	0.2207	0.8228	0.6343	0.1968	0.7535	0.3657	0.33	0.3	TRUE	3.32592
4nc570_030_1075	NCU06959.2	1.16177	1	1.01006	1.00998	0.42656	0.32917	0.42183	0.36629	0.46134	0.38645	0.54182	0.47086	0.2533	0.2533	0.2533	0.2533	0.12884	0.12884	0.12884	0.12884	0.45472	0.45472	0.45472	0.45472	0.7443	0.6933	0.6791	0.2557	0.4826	0.4723	0.3067	0.5174	0.5099	0.3209	0.5277	0.4901	0.48	0.45	TRUE	2.08387
4nc570_050_477	NCU06961.2	2.60366	1	2.06207	1.11599	0.5453	0.26549	0.43909	0.29336	0.48662	0.34665	0.49034	0.40603	0.17047	0.17047	0.17047	0.17047	0.08185	0.08185	0.08185	0.08185	0.2784	0.2784	0.2784	0.2784	0.9997	0.9074	0.996	0.0003	0.0045	0.2768	0.0926	0.9955	0.9943	0.004	0.7232	0.0057	0.32	0.32	TRUE	2.77208
4nc570_150_2012	NCU06969.2	1.1513	1	1.19928	1.07016	0.22296	0.20141	0.23351	0.21407	0.23815	0.22893	0.24085	0.25279	0.15517	0.15517	0.15517	0.15517	0.06916	0.06916	0.06916	0.06916	0.21131	0.21131	0.21131	0.21131	0.8459	0.3759	0.685	0.1541	0.1317	0.3063	0.6241	0.8683	0.7988	0.315	0.6937	0.2012	0.3	0.28	TRUE	4.99389
4nc570_190_415	NCU06974.2	1.07049	1	1.00307	1.00052	0.2	0.18872	0.18868	0.19179	0.20709	0.20372	0.20747	0.2199	0.14697	0.14697	0.14697	0.14697	0.06545	0.06545	0.06545	0.06545	0.19854	0.19854	0.19854	0.19854	0.7088	0.6928	0.676	0.2912	0.496	0.4949	0.3072	0.504	0.5066	0.324	0.5051	0.4934	0.3	0.26	TRUE	5.39075
4nc570_240_424	NCU06979.2	1.19747	1	1.1135	1.02421	0.35028	0.27186	0.31837	0.28526	0.3985	0.33288	0.37719	0.32251	0.23484	0.23484	0.23484	0.23484	0.09864	0.09864	0.09864	0.09864	0.28847	0.28847	0.28847	0.28847	0.8057	0.6198	0.7315	0.1943	0.3238	0.4537	0.3802	0.6762	0.6637	0.2685	0.5463	0.3363	0.42	0.38	TRUE	-0.371828
4nc570_270_1167	NCU06983.2	1.08549	1	1.04593	1.01659	0.19789	0.18926	0.19827	0.19995	0.22374	0.20601	0.21572	0.21517	0.14615	0.14615	0.14615	0.14615	0.06392	0.06392	0.06392	0.06392	0.20887	0.20887	0.20887	0.20887	0.7431	0.611	0.6697	0.2569	0.3704	0.4543	0.389	0.6296	0.5957	0.3303	0.5457	0.4043	0.29	0.26	TRUE	5.26022
4nc570_340_2364	NCU06990.2	1.36704	1	1.52079	1.00402	0.16685	0.1288	0.17706	0.12699	0.159	0.14903	0.17309	0.14734	0.09046	0.09046	0.09046	0.09046	0.04007	0.04007	0.04007	0.04007	0.14112	0.14112	0.14112	0.14112	0.9935	0.1058	0.9887	0.0065	0.004	0.4822	0.8942	0.996	0.9978	0.0113	0.5178	0.0022	0.19	0.17	TRUE	8.99209
4nc578_040_834	NCU07013.2	1.26573	1	1.13419	1.53588	0.56363	0.43726	0.64182	0.88587	0.69782	0.61395	0.91437	1.23043	0.38102	0.38102	0.38102	0.38102	0.18023	0.18023	0.18023	0.18023	0.55251	0.55251	0.55251	0.55251	0.7446	0.6467	0.3599	0.2554	0.4088	0.1676	0.3533	0.5912	0.3067	0.6401	0.8324	0.6933	0.17	0.16	TRUE	-3.29374
4nc580_020_1702	NCU07021.2	1.43651	1	1.0614	1.09159	0.55292	0.52201	0.41678	0.54389	0.58167	0.80977	0.49642	0.79858	0.32077	0.32077	0.32077	0.32077	0.15628	0.15628	0.15628	0.15628	0.51893	0.51893	0.51893	0.51893	0.8527	0.8456	0.7544	0.1473	0.4351	0.4382	0.1544	0.5649	0.4742	0.2456	0.5618	0.5258	0.28	0.17	TRUE	-0.0735531
4nc580_200_758	NCU07042.2	1.03328	1	1.0862	1.02455	0.0994	0.09995	0.10648	0.09863	0.10195	0.10528	0.10404	0.09879	0.06982	0.06982	0.06982	0.06982	0.03144	0.03144	0.03144	0.03144	0.10903	0.10903	0.10903	0.10903	0.7139	0.2159	0.5437	0.2861	0.133	0.3383	0.7841	0.867	0.8275	0.4563	0.6617	0.1725	0.16	0.34	TRUE	10.7193
4nc600_100_2313	NCU07260.2	1.47504	1	1.17223	1.0673	0.21601	0.14756	0.17149	0.16426	0.20916	0.17563	0.18848	0.19394	0.11542	0.11542	0.11542	0.11542	0.05098	0.05098	0.05098	0.05098	0.16226	0.16226	0.16226	0.16226	0.996	0.9683	0.981	0.004	0.1001	0.2628	0.0317	0.8999	0.815	0.019	0.7372	0.185	0.24	0.21	TRUE	6.09003
4nc600_160_370	NCU07266.2	1.26644	1	1.42811	1.03377	0.34529	0.25263	0.3611	0.25506	0.36965	0.29563	0.40167	0.29204	0.17946	0.17946	0.17946	0.17946	0.08416	0.08416	0.08416	0.08416	0.29004	0.29004	0.29004	0.29004	0.9037	0.2688	0.8412	0.0963	0.0578	0.4169	0.7312	0.9422	0.9548	0.1588	0.5831	0.0452	0.36	0.33	TRUE	3.02848
4nc600_200_995	NCU07270.2	1.12924	1	1.17196	1.07153	0.11851	0.11221	0.12146	0.10898	0.12928	0.11596	0.12542	0.12822	0.07918	0.07918	0.07918	0.07918	0.03628	0.03628	0.03628	0.03628	0.12687	0.12687	0.12687	0.12687	0.9445	0.2917	0.7486	0.0555	0.0421	0.159	0.7083	0.9579	0.8883	0.2514	0.841	0.1117	0.17	0.15	TRUE	9.79852
4nc600_260_4264	NCU07276.2	1.27866	1	1.24923	1.09249	0.16691	0.14063	0.16834	0.1569	0.18252	0.15645	0.17242	0.16693	0.10214	0.10214	0.10214	0.10214	0.04545	0.04545	0.04545	0.04545	0.1512	0.1512	0.1512	0.1512	0.9835	0.6063	0.9195	0.0165	0.0369	0.1686	0.3937	0.9631	0.9123	0.0805	0.8314	0.0877	0.22	0.19	TRUE	7.75804
4nc605_070_647	NCU07285.2	1.31006	1	1.21903	1.12098	0.16174	0.13847	0.15559	0.15541	0.17898	0.14878	0.16364	0.15112	0.09488	0.09488	0.09488	0.09488	0.04335	0.04335	0.04335	0.04335	0.15178	0.15178	0.15178	0.15178	0.9908	0.8029	0.9264	0.0092	0.042	0.1062	0.1971	0.958	0.8423	0.0736	0.8938	0.1577	0.2	0.18	TRUE	8.38448
4nc605_180_1171	NCU07297.2	1.10255	1	1.17094	1.03956	0.18171	0.16798	0.19383	0.17869	0.20183	0.18933	0.20354	0.19625	0.12728	0.12728	0.12728	0.12728	0.05683	0.05683	0.05683	0.05683	0.17888	0.17888	0.17888	0.17888	0.8033	0.288	0.6811	0.1967	0.1251	0.3573	0.712	0.8749	0.8365	0.3189	0.6427	0.1635	0.26	0.23	TRUE	6.45352
4nc610_090_2654	NCU07313.2a	1.31832	1	1.46465	1.20038	0.24246	0.2005	0.29675	0.25945	0.26681	0.22877	0.31268	0.29067	0.13024	0.13024	0.13024	0.13024	0.06372	0.06372	0.06372	0.06372	0.24147	0.24147	0.24147	0.24147	0.9676	0.2007	0.7496	0.0324	0.0248	0.085	0.7993	0.9752	0.8995	0.2504	0.915	0.1005	0.28	0.26	TRUE	5.0386
4nc610_120_287	NCU07316.2	1.80309	1	1.67758	1.19151	0.51442	0.28329	0.53093	0.33398	0.51313	0.38509	0.48523	0.4378	0.12245	0.12245	0.12245	0.12245	0.07845	0.07845	0.07845	0.07845	0.46433	0.46433	0.46433	0.46433	0.9807	0.7088	0.9523	0.0193	0.0359	0.1093	0.2912	0.9641	0.9415	0.0477	0.8907	0.0585	0.31	0.31	TRUE	7.84356
4nc610_230_786	NCU07326.2	12.8034	1	359.661	2.32787	3.51979	0.33132	14.024	0.69494	11.8991	1.73103	3.72481	1.61626	0.13393	0.13393	0.13393	0.13393	0.07544	0.07544	0.07544	0.07544	0.43294	0.43294	0.43294	0.43294	1	0	0.9999	0	0	0.0332	1	1	1	0.0001	0.9668	0	0.27	0.3	TRUE	5.34603
4nc610_250_2246	NCU07328.2a	1.1196	1	1.2	1.04033	0.11172	0.10421	0.12662	0.11515	0.12177	0.11762	0.12623	0.1138	0.07937	0.07937	0.07937	0.07937	0.03507	0.03507	0.03507	0.03507	0.11977	0.11977	0.11977	0.11977	0.9342	0.1711	0.8243	0.0658	0.0318	0.2814	0.8289	0.9682	0.959	0.1757	0.7186	0.041	0.18	0.15	TRUE	8.95357
4nc610_330_2047	NCU07335.2	1.15334	1	1.35715	1.19248	0.36973	0.32103	0.54619	0.56867	0.36271	0.3818	0.56753	0.77248	0.17069	0.17069	0.17069	0.17069	0.10647	0.10647	0.10647	0.10647	0.48762	0.48762	0.48762	0.48762	0.7997	0.1765	0.4526	0.2003	0.1287	0.2278	0.8235	0.8713	0.6627	0.5474	0.7722	0.3373	0.4	0.37	TRUE	5.03743
4nc610_380_353	NCU07340.2	151.023	1	420.948	1.14	40.745	0.41571	72.9873	0.42928	71.3673	1.22855	40.7986	0.91641	0.1841	0.1841	0.1841	0.1841	0.10053	0.10053	0.10053	0.10053	0.42905	0.42905	0.42905	0.42905	1	0.0036	1	0	0	0.3668	0.9964	1	1	0	0.6332	0	0.16	0.37	TRUE	2.89048
4nc610_410_1342	NCU07343.2	1.07978	1	1.10645	1.03515	0.1442	0.13818	0.14809	0.13919	0.15191	0.14052	0.15833	0.1489	0.10056	0.10056	0.10056	0.10056	0.04455	0.04455	0.04455	0.04455	0.149	0.149	0.149	0.149	0.8109	0.3853	0.662	0.1891	0.1538	0.3308	0.6147	0.8462	0.7805	0.338	0.6692	0.2195	0.22	0.19	TRUE	8.00773
4nc620_200_1615	NCU06304.2	1.16562	1	1.06598	1.05373	0.46027	0.47707	0.43911	0.48564	0.55304	0.58004	0.52277	0.65452	0.26109	0.26109	0.26109	0.26109	0.15129	0.15129	0.15129	0.15129	0.65424	0.65424	0.65424	0.65424	0.6952	0.6564	0.6285	0.3048	0.4135	0.4132	0.3436	0.5865	0.5258	0.3715	0.5868	0.4742	0.22	0.49	TRUE	2.35466
4nc620_220_2558	NCU06306.2	1.22292	1	1.27763	1.06093	0.08382	0.07237	0.08335	0.0751	0.08256	0.07324	0.08948	0.07806	0.04963	0.04963	0.04963	0.04963	0.02235	0.02235	0.02235	0.02235	0.0787	0.0787	0.0787	0.0787	0.9968	0.1589	0.9835	0.0032	0.0029	0.1031	0.8411	0.9971	0.9957	0.0165	0.8969	0.0043	0.36	0.24	TRUE	13.4052
4nc620_260_499	NCU06310.2	1.25894	1	1.10892	1.00552	0.28154	0.23208	0.24774	0.23093	0.28538	0.25588	0.29274	0.28052	0.18481	0.18481	0.18481	0.18481	0.07988	0.07988	0.07988	0.07988	0.23347	0.23347	0.23347	0.23347	0.9171	0.7792	0.8773	0.0829	0.2843	0.4853	0.2208	0.7157	0.7296	0.1227	0.5147	0.2704	0.35	0.32	TRUE	2.32448
4nc620_270_286	NCU06311.2	1.38926	1	1.00744	1.09514	0.28631	0.18898	0.2137	0.2234	0.30486	0.21709	0.25113	0.23168	0.13457	0.13457	0.13457	0.13457	0.06551	0.06551	0.06551	0.06551	0.24162	0.24162	0.24162	0.24162	0.9758	0.9609	0.9223	0.0242	0.4831	0.2315	0.0391	0.5169	0.2414	0.0777	0.7685	0.7586	0.29	0.26	TRUE	5.64243
4nc620_420_633	NCU10966.2a	1.71141	1	2.56643	1.41143	0.55259	0.35201	0.74804	0.46933	0.71065	0.49248	0.71273	0.57806	0.27541	0.27541	0.27541	0.27541	0.11554	0.11554	0.11554	0.11554	0.32389	0.32389	0.32389	0.32389	0.9665	0.077	0.7529	0.0335	0.0056	0.0897	0.923	0.9944	0.9846	0.2471	0.9103	0.0154	0.43	0.42	TRUE	-1.49878
4nc620_460_304	NCU06330.2	1.03719	1	1.13963	1.04894	0.22797	0.2212	0.23511	0.2313	0.25201	0.24513	0.27234	0.27247	0.17245	0.17245	0.17245	0.17245	0.07473	0.07473	0.07473	0.07473	0.22396	0.22396	0.22396	0.22396	0.5964	0.266	0.4758	0.4036	0.2267	0.3717	0.734	0.7733	0.708	0.5242	0.6283	0.292	0.33	0.3	TRUE	4.05474
4nc620_480_1253	NCU06332.2	1.05021	1	1.13169	1.07135	0.18781	0.17253	0.19817	0.19375	0.1943	0.20254	0.20449	0.20692	0.13744	0.13744	0.13744	0.13744	0.06133	0.06133	0.06133	0.06133	0.18872	0.18872	0.18872	0.18872	0.6585	0.2565	0.4353	0.3415	0.1869	0.283	0.7435	0.8131	0.6819	0.5647	0.717	0.3181	0.28	0.25	TRUE	5.72016
4nc625_010_240	NCU06335.2	1.37163	1	1.03785	1.06136	0.36999	0.31903	0.30196	0.36006	0.39934	0.38371	0.35054	0.43593	0.22911	0.22911	0.22911	0.22911	0.10805	0.10805	0.10805	0.10805	0.33626	0.33626	0.33626	0.33626	0.9222	0.901	0.8437	0.0778	0.4413	0.4087	0.099	0.5587	0.4633	0.1563	0.5913	0.5367	0.43	0.39	TRUE	1.95382
4nc625_070_538	NCU06341.2	1.37891	1	1.18565	1.02117	0.59308	0.34946	0.60292	0.37422	0.65621	0.34815	0.82141	0.38478	0.17072	0.17072	0.17072	0.17072	0.10593	0.10593	0.10593	0.10593	0.53221	0.53221	0.53221	0.53221	0.9315	0.6855	0.8654	0.0685	0.2737	0.4441	0.3145	0.7263	0.7414	0.1346	0.5559	0.2586	0.4	0.38	TRUE	4.65372
4nc625_160_72	NCU06350.2	1.0769	1	1.23471	1.13918	0.57271	0.50843	0.67925	0.53069	0.84293	0.63836	0.87294	0.71438	0.36274	0.36274	0.36274	0.36274	0.19578	0.19578	0.19578	0.19578	0.70528	0.70528	0.70528	0.70528	0.5603	0.4021	0.4428	0.4397	0.3235	0.3058	0.5979	0.6765	0.5842	0.5572	0.6942	0.4158	0.16	0.19	TRUE	0.0572581
4nc625_370_2179	NCU06373.2	2.11801	1	2.21512	1.12346	0.82833	0.31271	0.49856	0.27844	0.66119	0.59189	0.43041	0.38084	0.09458	0.09458	0.09458	0.09458	0.06337	0.06337	0.06337	0.06337	0.43162	0.43162	0.43162	0.43162	0.9648	0.3499	0.965	0.0352	0.0124	0.1473	0.6501	0.9876	0.9939	0.035	0.8527	0.0061	0.26	0.26	TRUE	8.4484
4nc625_400_1521	NCU06376.2	1.43559	1	1.0096	1.1847	0.36959	0.27119	0.30558	0.35226	0.39504	0.32095	0.35013	0.4103	0.20139	0.20139	0.20139	0.20139	0.09464	0.09464	0.09464	0.09464	0.30969	0.30969	0.30969	0.30969	0.9512	0.9556	0.8077	0.0488	0.4833	0.1855	0.0444	0.5167	0.2295	0.1923	0.8145	0.7705	0.39	0.36	TRUE	3.31055
4nc671_010_1180	NCU08643.2	1.05812	1	1.18493	1.06124	0.27023	0.25589	0.29267	0.26503	0.30877	0.2922	0.31263	0.29405	0.20448	0.20448	0.20448	0.20448	0.08774	0.08774	0.08774	0.08774	0.25881	0.25881	0.25881	0.25881	0.6231	0.2552	0.4906	0.3769	0.202	0.3609	0.7448	0.798	0.7343	0.5094	0.6391	0.2657	0.38	0.34	TRUE	1.71765
4nc673_090_91	NCU08657.2	1.11523	1	1.29929	1.13506	0.30974	0.24801	0.37116	0.28387	0.36181	0.27603	0.35232	0.2904	0.10629	0.10629	0.10629	0.10629	0.06808	0.06808	0.06808	0.06808	0.42446	0.42446	0.42446	0.42446	0.7978	0.1438	0.4444	0.2022	0.0798	0.1353	0.8562	0.9202	0.8438	0.5556	0.8647	0.1562	0.3	0.28	TRUE	7.21644
4nc673_120_1884	NCU08659.2b	1.55123	1	1.40747	1.0101	0.21432	0.15558	0.20264	0.15558	0.21163	0.1704	0.19653	0.17597	0.11252	0.11252	0.11252	0.11252	0.05002	0.05002	0.05002	0.05002	0.15811	0.15811	0.15811	0.15811	0.9969	0.8338	0.9948	0.0031	0.0133	0.4575	0.1662	0.9867	0.9913	0.0052	0.5425	0.0087	0.23	0.21	TRUE	6.34924
4nc673_130_58	NCU08660.2	1.74017	1	1.29853	1.05955	0.67075	0.43544	0.49844	0.46928	0.61868	0.6641	0.56467	0.70027	0.25994	0.25994	0.25994	0.25994	0.15285	0.15285	0.15285	0.15285	0.57115	0.57115	0.57115	0.57115	0.9373	0.8711	0.9045	0.0627	0.221	0.4116	0.1289	0.779	0.7565	0.0955	0.5884	0.2435	0.5	0.48	TRUE	3.12228
4nc675_020_1849	NCU08667.2	1.26213	1	1.23455	1.14464	0.75284	0.40712	0.65704	0.46561	1.02642	0.57012	0.78196	0.52521	0.27926	0.27926	0.27926	0.27926	0.15665	0.15665	0.15665	0.15665	0.62792	0.62792	0.62792	0.62792	0.7324	0.5206	0.5884	0.2676	0.2966	0.2956	0.4794	0.7034	0.6113	0.4116	0.7044	0.3887	0.2	0.21	TRUE	2.02612
4nc675_060_778	NCU08671.2	1.30133	1	1.46734	1.10024	0.37866	0.30893	0.36734	0.29547	0.43288	0.38246	0.38715	0.3688	0.20639	0.20639	0.20639	0.20639	0.09932	0.09932	0.09932	0.09932	0.32466	0.32466	0.32466	0.32466	0.869	0.2611	0.7691	0.131	0.0673	0.2901	0.7389	0.9327	0.9128	0.2309	0.7099	0.0872	0.4	0.37	TRUE	2.80166
4nc675_140_335	NCU08680.2	1.08503	1	1.12776	1.02652	0.16192	0.1561	0.17418	0.15493	0.18011	0.17623	0.18377	0.17001	0.11762	0.11762	0.11762	0.11762	0.05099	0.05099	0.05099	0.05099	0.16392	0.16392	0.16392	0.16392	0.7851	0.3563	0.6881	0.2149	0.1676	0.4027	0.6437	0.8324	0.8147	0.3119	0.5973	0.1853	0.25	0.22	TRUE	5.38324
4nc677_010_1755	NCU08686.2	1.17823	1	1.24807	1.06324	0.43598	0.37467	0.57734	0.57948	0.40978	0.43937	0.63403	0.87419	0.21513	0.21513	0.21513	0.21513	0.12929	0.12929	0.12929	0.12929	0.5841	0.5841	0.5841	0.5841	0.7798	0.3889	0.6295	0.2202	0.2302	0.4178	0.6111	0.7698	0.6594	0.3705	0.5822	0.3406	0.46	0.44	TRUE	3.4507
4nc677_020_458	NCU08687.2	1.61842	1	1.92787	1.22444	0.54302	0.36855	0.58569	0.4195	0.61295	0.50433	0.67596	0.58598	0.28936	0.28936	0.28936	0.28936	0.1215	0.1215	0.1215	0.1215	0.33486	0.33486	0.33486	0.33486	0.9524	0.246	0.8202	0.0476	0.0295	0.21	0.754	0.9705	0.9384	0.1798	0.79	0.0616	0.46	0.44	TRUE	-1.82856
4nc677_070_540	NCU08691.2	1.12744	1	1.22225	1.06161	0.20836	0.19819	0.23845	0.20367	0.24067	0.2281	0.24571	0.22886	0.15269	0.15269	0.15269	0.15269	0.06771	0.06771	0.06771	0.06771	0.20459	0.20459	0.20459	0.20459	0.8139	0.2661	0.6545	0.1861	0.1132	0.3231	0.7339	0.8868	0.8433	0.3455	0.6769	0.1567	0.3	0.27	TRUE	5.10806
4nc700_060_1573	NCU10409.2b	1.0896	1	1.08245	1.04419	0.1161	0.1116	0.11338	0.12139	0.12325	0.11865	0.12321	0.11668	0.08217	0.08217	0.08217	0.08217	0.03608	0.03608	0.03608	0.03608	0.12069	0.12069	0.12069	0.12069	0.8724	0.5394	0.712	0.1276	0.1704	0.2717	0.4606	0.8296	0.7037	0.288	0.7283	0.2963	0.18	0.16	TRUE	9.57876
4nc705_030_1	NCU08814.2	1.25725	1	2.09284	1.06963	0.19906	0.17853	0.31119	0.19565	0.23266	0.21008	0.2792	0.20405	0.1262	0.1262	0.1262	0.1262	0.05591	0.05591	0.05591	0.05591	0.1751	0.1751	0.1751	0.1751	0.963	0.0036	0.8888	0.037	0.0008	0.2742	0.9964	0.9992	0.9989	0.1112	0.7258	0.0011	0.24	0.23	TRUE	5.61903
4nc705_050_19	NCU08818.2	2.03182	1	1.33113	1.79957	0.46008	0.26197	0.31308	0.43732	0.49183	0.3033	0.38142	0.47561	0.19458	0.19458	0.19458	0.19458	0.08429	0.08429	0.08429	0.08429	0.24972	0.24972	0.24972	0.24972	0.9977	0.9765	0.739	0.0023	0.085	0.007	0.0235	0.915	0.0565	0.261	0.993	0.9435	0.35	0.33	TRUE	1.69878
4nc710_030_1968	NCU08826.2	1.40875	1	1.40862	1.09144	0.11498	0.0896	0.11107	0.09874	0.11959	0.08924	0.11251	0.09969	0.06046	0.06046	0.06046	0.06046	0.02722	0.02722	0.02722	0.02722	0.09467	0.09467	0.09467	0.09467	0.9991	0.4992	0.9958	0.0009	0.0013	0.068	0.5008	0.9987	0.9962	0.0042	0.932	0.0038	0.2	0.17	TRUE	12.0759
4nc710_040_844	NCU08827.2	1.00407	1	1.1322	1.00859	0.11393	0.11152	0.12266	0.11497	0.11723	0.11558	0.12586	0.12291	0.07866	0.07866	0.07866	0.07866	0.03533	0.03533	0.03533	0.03533	0.12139	0.12139	0.12139	0.12139	0.5271	0.0663	0.4834	0.4729	0.0815	0.4516	0.9337	0.9185	0.9285	0.5166	0.5484	0.0715	0.18	0.16	TRUE	9.4637
4nc710_180_1804	NCU08841.2	1.24639	1	1.02944	1.00888	0.31365	0.2675	0.27644	0.27989	0.35473	0.32592	0.32381	0.32097	0.22699	0.22699	0.22699	0.22699	0.09599	0.09599	0.09599	0.09599	0.27745	0.27745	0.27745	0.27745	0.8584	0.8285	0.8168	0.1416	0.449	0.4798	0.1715	0.551	0.5425	0.1832	0.5202	0.4575	0.41	0.37	TRUE	2.1414
4nc755_020_1148	NCU05161.2	1.4106	1	1.00825	1.07171	0.23442	0.18089	0.18931	0.20844	0.26105	0.21189	0.20338	0.22312	0.14212	0.14212	0.14212	0.14212	0.06302	0.06302	0.06302	0.06302	0.1911	0.1911	0.1911	0.1911	0.9856	0.9844	0.9534	0.0144	0.4771	0.284	0.0156	0.5229	0.3118	0.0466	0.716	0.6882	0.28	0.26	TRUE	5.13113
4nc755_060_270	NCU05165.2	1.13002	1	1.00445	1.05648	0.19171	0.17425	0.17008	0.18973	0.21126	0.18757	0.19406	0.19778	0.13365	0.13365	0.13365	0.13365	0.0596	0.0596	0.0596	0.0596	0.18682	0.18682	0.18682	0.18682	0.852	0.8348	0.6948	0.148	0.4855	0.3186	0.1652	0.5145	0.3321	0.3052	0.6814	0.6679	0.27	0.24	TRUE	6.00776
4nc760_050_817	NCU05202.2	1.12829	1	1.16522	1.27057	0.33012	0.31396	0.35472	0.39161	0.39409	0.39716	0.39366	0.47231	0.26865	0.26865	0.26865	0.26865	0.11181	0.11181	0.11181	0.11181	0.30804	0.30804	0.30804	0.30804	0.7079	0.4391	0.333	0.2921	0.2838	0.1791	0.5609	0.7162	0.3632	0.667	0.8209	0.6368	0.45	0.41	TRUE	0.576384
4nc760_190_1001	NCU05217.2	1.18743	1	1.14368	1.19688	0.35297	0.31919	0.37795	0.45229	0.39101	0.39749	0.43275	0.53919	0.21093	0.21093	0.21093	0.21093	0.1089	0.1089	0.1089	0.1089	0.4065	0.4065	0.4065	0.4065	0.8141	0.5877	0.4931	0.1859	0.2872	0.2311	0.4123	0.7128	0.4329	0.5069	0.7689	0.5671	0.43	0.4	TRUE	3.19539
4nc765_010_877	4nc765_010	1.08933	1	1.27811	1.02923	0.32863	0.33011	0.44198	0.36589	0.41498	0.40596	0.4892	0.47952	0.26285	0.26285	0.26285	0.26285	0.12198	0.12198	0.12198	0.12198	0.36289	0.36289	0.36289	0.36289	0.6493	0.2528	0.5784	0.3507	0.1959	0.4449	0.7472	0.8041	0.7758	0.4216	0.5551	0.2242	0.47	0.43	TRUE	1.56779
4nc765_070_602	NCU05223.2b	1.25077	1	1.11738	1.01842	0.43097	0.34574	0.52076	0.46381	0.43886	0.43143	0.62388	0.68239	0.2516	0.2516	0.2516	0.2516	0.12825	0.12825	0.12825	0.12825	0.41572	0.41572	0.41572	0.41572	0.7914	0.6922	0.7171	0.2086	0.3803	0.4765	0.3078	0.6197	0.5873	0.2829	0.5235	0.4127	0.48	0.45	TRUE	1.72501
4nc765_170_464	NCU05233.2	1.54277	1	1.23558	1.06729	0.36445	0.22133	0.28074	0.22303	0.38089	0.26883	0.3053	0.26348	0.11761	0.11761	0.11761	0.11761	0.06417	0.06417	0.06417	0.06417	0.31571	0.31571	0.31571	0.31571	0.9773	0.9126	0.9633	0.0227	0.0945	0.2678	0.0874	0.9055	0.8867	0.0367	0.7322	0.1133	0.29	0.27	TRUE	6.50771
4nc770_020_119	NCU05236.2	1.85513	1	2.84639	2.45279	0.63757	0.4266	0.81336	0.8502	0.79955	0.76828	0.81748	0.88971	0.23905	0.23905	0.23905	0.23905	0.12331	0.12331	0.12331	0.12331	0.43382	0.43382	0.43382	0.43382	0.9609	0.0467	0.1608	0.0391	0.0095	0.0173	0.9533	0.9905	0.7493	0.8392	0.9827	0.2507	0.44	0.43	TRUE	2.52278
4nc778_030_1732	NCU05273.2	1.27654	1	1.00456	1.02975	0.31285	0.24819	0.27464	0.30014	0.32094	0.30178	0.32722	0.34859	0.19146	0.19146	0.19146	0.19146	0.08892	0.08892	0.08892	0.08892	0.28879	0.28879	0.28879	0.28879	0.8992	0.903	0.8391	0.1008	0.4926	0.4369	0.097	0.5074	0.449	0.1609	0.5631	0.551	0.38	0.35	TRUE	3.20582
4nc778_060_203	NCU05275.2	1.35051	1	1.01293	1.03241	0.21576	0.17548	0.17988	0.18216	0.22895	0.19528	0.20174	0.21385	0.13512	0.13512	0.13512	0.13512	0.06127	0.06127	0.06127	0.06127	0.18963	0.18963	0.18963	0.18963	0.9819	0.9756	0.9551	0.0181	0.4602	0.3787	0.0244	0.5398	0.4349	0.0449	0.6213	0.5651	0.27	0.24	TRUE	4.57563
4nc780_140_1211	4nc780_140	1.31057	1	1.29599	1.11402	0.46526	0.38961	0.50406	0.52665	0.52728	0.56851	0.5906	0.7197	0.29636	0.29636	0.29636	0.29636	0.14843	0.14843	0.14843	0.14843	0.46472	0.46472	0.46472	0.46472	0.8392	0.5255	0.6834	0.1608	0.2213	0.3609	0.4745	0.7787	0.6801	0.3166	0.6391	0.3199	0.26	0.49	TRUE	1.16743
4nc780_150_1727	NCU05300.2	1.09943	1	1.16788	1.13538	0.21492	0.19789	0.21989	0.22909	0.24495	0.22707	0.2507	0.23703	0.15385	0.15385	0.15385	0.15385	0.06691	0.06691	0.06691	0.06691	0.20798	0.20798	0.20798	0.20798	0.7672	0.3291	0.4178	0.2328	0.1658	0.1792	0.6709	0.8342	0.5762	0.5822	0.8208	0.4238	0.31	0.27	TRUE	5.01444
4nc780_210_798	NCU05306.2	1.06009	1	1.22116	1.18852	0.16983	0.16288	0.19013	0.187	0.18748	0.1993	0.19922	0.2008	0.12189	0.12189	0.12189	0.12189	0.05331	0.05331	0.05331	0.05331	0.17941	0.17941	0.17941	0.17941	0.7071	0.1059	0.1812	0.2929	0.0765	0.081	0.8941	0.9235	0.6076	0.8188	0.919	0.3924	0.26	0.23	TRUE	6.40114
4nc782_010_1387	4nc782_010	1.17008	1	1.24367	1.12128	0.14562	0.13159	0.14903	0.14189	0.15325	0.14254	0.16427	0.15031	0.09379	0.09379	0.09379	0.09379	0.04198	0.04198	0.04198	0.04198	0.14002	0.14002	0.14002	0.14002	0.9485	0.229	0.6786	0.0515	0.031	0.0985	0.771	0.969	0.881	0.3214	0.9015	0.119	0.2	0.18	TRUE	8.66496
4nc782_080_1685	NCU05315.2	1.24778	1	1.17882	1.13577	0.24818	0.20213	0.23076	0.23016	0.26859	0.2407	0.2505	0.25661	0.16365	0.16365	0.16365	0.16365	0.07087	0.07087	0.07087	0.07087	0.20716	0.20716	0.20716	0.20716	0.9222	0.6561	0.7201	0.0778	0.1592	0.1933	0.3439	0.8408	0.6183	0.2799	0.8067	0.3817	0.32	0.29	TRUE	4.47656
4nc782_100_247	NCU05316.2b	1.2176	1	1.23809	1.11267	0.21958	0.19996	0.2472	0.24025	0.23688	0.21195	0.28102	0.24858	0.13267	0.13267	0.13267	0.13267	0.06437	0.06437	0.06437	0.06437	0.24314	0.24314	0.24314	0.24314	0.9282	0.4396	0.7443	0.0718	0.0903	0.1874	0.5604	0.9097	0.7673	0.2557	0.8126	0.2327	0.29	0.26	TRUE	5.28899
4nc782_150_588	NCU05320.2	1.4035	1	1.40195	1.10316	0.31821	0.24788	0.32698	0.28715	0.3549	0.31145	0.35388	0.31763	0.19642	0.19642	0.19642	0.19642	0.08512	0.08512	0.08512	0.08512	0.25046	0.25046	0.25046	0.25046	0.9571	0.4985	0.8829	0.0429	0.0626	0.2866	0.5015	0.9374	0.9096	0.1171	0.7134	0.0904	0.36	0.33	TRUE	3.04403
4nc782_160_1627	NCU05321.2	1.07243	1	1.06053	1.03303	0.47938	0.4187	0.64798	0.5511	0.53121	0.45912	0.98931	0.69819	0.28319	0.28319	0.28319	0.28319	0.16017	0.16017	0.16017	0.16017	0.64279	0.64279	0.64279	0.64279	0.6083	0.5232	0.553	0.3917	0.4491	0.4638	0.4768	0.5509	0.5224	0.447	0.5362	0.4776	0.36	0.15	TRUE	1.58553
53h1_140_256	NCU02608.2	1.22964	1	1.10981	1.04107	0.22243	0.17321	0.19871	0.18259	0.22322	0.20172	0.19454	0.20965	0.13778	0.13778	0.13778	0.13778	0.05916	0.05916	0.05916	0.05916	0.18232	0.18232	0.18232	0.18232	0.9335	0.8054	0.871	0.0665	0.232	0.3683	0.1946	0.768	0.6987	0.129	0.6317	0.3013	0.28	0.25	TRUE	5.72955
5c2_070_1124	NCU03146.2	1.21815	1	1.11945	1.1576	0.32365	0.27413	0.28771	0.30731	0.38211	0.34652	0.32537	0.34216	0.22314	0.22314	0.22314	0.22314	0.09525	0.09525	0.09525	0.09525	0.27382	0.27382	0.27382	0.27382	0.8244	0.6772	0.5881	0.1756	0.3082	0.2262	0.3228	0.6918	0.4303	0.4119	0.7738	0.5697	0.4	0.36	TRUE	0.889795
5c2_130_673	NCU03138.2	1.07936	1	1.12845	1.06182	0.15536	0.14521	0.15774	0.14456	0.15591	0.15471	0.16507	0.1665	0.10647	0.10647	0.10647	0.10647	0.04802	0.04802	0.04802	0.04802	0.15158	0.15158	0.15158	0.15158	0.7991	0.3075	0.5556	0.2009	0.1418	0.2516	0.6925	0.8582	0.7442	0.4444	0.7484	0.2558	0.23	0.2	TRUE	7.85752
5c2_160_485	NCU03135.2	1.06688	1	1.16092	1.05868	0.11511	0.11021	0.12318	0.1083	0.11739	0.11078	0.12341	0.12119	0.07966	0.07966	0.07966	0.07966	0.03554	0.03554	0.03554	0.03554	0.11638	0.11638	0.11638	0.11638	0.827	0.1351	0.5465	0.173	0.0535	0.2043	0.8649	0.9465	0.8817	0.4535	0.7957	0.1183	0.18	0.15	TRUE	10.0279
5c2_240_2448	NCU03127.2	1.03692	1	1.01585	1.06321	0.18331	0.18238	0.18846	0.18998	0.20258	0.19368	0.20532	0.20835	0.13833	0.13833	0.13833	0.13833	0.06144	0.06144	0.06144	0.06144	0.19385	0.19385	0.19385	0.19385	0.6212	0.5669	0.421	0.3788	0.4553	0.3062	0.4331	0.5447	0.3528	0.579	0.6938	0.6472	0.28	0.25	TRUE	5.76884
5c2_250_56	NCU03126.2	1.60877	1	1.38529	1.01414	0.46255	0.31079	0.41798	0.32192	0.54041	0.39879	0.47496	0.39295	0.26307	0.26307	0.26307	0.26307	0.11061	0.11061	0.11061	0.11061	0.29962	0.29962	0.29962	0.29962	0.964	0.7293	0.9441	0.036	0.1251	0.4762	0.2707	0.8749	0.9059	0.0559	0.5238	0.0941	0.44	0.41	TRUE	-2.42451
5e6_020_468	NCU08874.2	1.19085	1	1.24071	1.07807	0.25118	0.20691	0.22775	0.1988	0.26131	0.25438	0.23098	0.22412	0.12993	0.12993	0.12993	0.12993	0.06304	0.06304	0.06304	0.06304	0.23653	0.23653	0.23653	0.23653	0.8675	0.3451	0.7493	0.1325	0.0953	0.258	0.6549	0.9047	0.8677	0.2507	0.742	0.1323	0.29	0.26	TRUE	6.30873
5e6_070_123	NCU08870.2	1.34002	1	1.26788	1.18156	0.36979	0.25463	0.29625	0.25231	0.37817	0.29211	0.34331	0.28091	0.13621	0.13621	0.13621	0.13621	0.07353	0.07353	0.07353	0.07353	0.32994	0.32994	0.32994	0.32994	0.9307	0.6402	0.7642	0.0693	0.0963	0.1113	0.3598	0.9037	0.7195	0.2358	0.8887	0.2805	0.32	0.29	TRUE	5.47681
5e6_080_2575	NCU08869.2	1.04381	1	1.05678	1.08053	0.21895	0.21436	0.21994	0.22859	0.24801	0.24317	0.25265	0.25697	0.17153	0.17153	0.17153	0.17153	0.07468	0.07468	0.07468	0.07468	0.23501	0.23501	0.23501	0.23501	0.6175	0.4651	0.4167	0.3825	0.3809	0.2994	0.5349	0.6191	0.4336	0.5833	0.7006	0.5664	0.33	0.3	TRUE	4.24481
5e6_090_1527	NCU08868.2	1.1399	1	1.07304	1.11146	0.20201	0.16054	0.19329	0.17438	0.21659	0.17556	0.20989	0.18253	0.11124	0.11124	0.11124	0.11124	0.05329	0.05329	0.05329	0.05329	0.20018	0.20018	0.20018	0.20018	0.8882	0.6957	0.58	0.1118	0.2835	0.1504	0.3043	0.7165	0.3565	0.42	0.8496	0.6435	0.25	0.23	TRUE	7.04997
5f3_100_1489	NCU04641.2	1.13995	1	1.2482	1.06767	0.3134	0.29252	0.47608	0.4117	0.32558	0.32931	0.53132	0.50464	0.18644	0.18644	0.18644	0.18644	0.09757	0.09757	0.09757	0.09757	0.3801	0.3801	0.3801	0.3801	0.7718	0.3142	0.6065	0.2282	0.2026	0.3606	0.6858	0.7974	0.6935	0.3935	0.6394	0.3065	0.4	0.36	TRUE	3.87599
5l23_150_393	NCU02296.2	1.02781	1	1.10478	1.12235	0.14858	0.14342	0.16566	0.15043	0.15039	0.15956	0.15905	0.17706	0.10685	0.10685	0.10685	0.10685	0.04909	0.04909	0.04909	0.04909	0.15428	0.15428	0.15428	0.15428	0.6223	0.217	0.2032	0.3777	0.1825	0.1209	0.783	0.8175	0.4282	0.7968	0.8791	0.5718	0.23	0.2	TRUE	6.55515
5nc100_010_415	NCU09669.1	1.12566	1	1.27285	1.12593	0.20136	0.17726	0.21466	0.20261	0.22249	0.21037	0.23203	0.22143	0.1422	0.1422	0.1422	0.1422	0.06342	0.06342	0.06342	0.06342	0.1951	0.1951	0.1951	0.1951	0.828	0.1679	0.4979	0.172	0.0647	0.1707	0.8321	0.9353	0.8327	0.5021	0.8293	0.1673	0.29	0.25	TRUE	5.57257
5nc500_070_1259	NCU08967.2	1.13179	1	1.08122	1.18504	0.14814	0.114	0.13398	0.13361	0.15613	0.12281	0.14096	0.13231	0.0716	0.0716	0.0716	0.0716	0.03559	0.03559	0.03559	0.03559	0.15062	0.15062	0.15062	0.15062	0.9378	0.7209	0.273	0.0622	0.1733	0.0277	0.2791	0.8267	0.1064	0.727	0.9723	0.8936	0.18	0.16	TRUE	10.1106
5nc846_070_1754	NCU07235.2a	1.03515	1	1.10514	1.04225	0.10229	0.10295	0.10807	0.10384	0.10625	0.1032	0.11065	0.10689	0.07094	0.07094	0.07094	0.07094	0.03154	0.03154	0.03154	0.03154	0.11181	0.11181	0.11181	0.11181	0.7049	0.1544	0.4596	0.2951	0.0985	0.2485	0.8456	0.9015	0.8266	0.5404	0.7515	0.1734	0.16	0.47	TRUE	10.5254
61d6_010_1245	NCU01703.2	1.19029	1	1.18477	1.09296	0.23754	0.20966	0.2422	0.23242	0.26442	0.24143	0.26979	0.26116	0.16527	0.16527	0.16527	0.16527	0.07252	0.07252	0.07252	0.07252	0.21047	0.21047	0.21047	0.21047	0.8799	0.5127	0.6993	0.1201	0.1638	0.2674	0.4873	0.8362	0.7117	0.3007	0.7326	0.2883	0.32	0.29	TRUE	4.46024
61d6_030_1214	NCU01701.2	1.69596	1	1.28651	1.01192	0.32584	0.2167	0.29841	0.24257	0.30466	0.25605	0.31532	0.32258	0.15853	0.15853	0.15853	0.15853	0.07697	0.07697	0.07697	0.07697	0.25783	0.25783	0.25783	0.25783	0.9941	0.956	0.9856	0.0059	0.0981	0.4631	0.044	0.9019	0.8878	0.0144	0.5369	0.1122	0.32	0.3	TRUE	4.33523
61d6_070_1066	NCU01697.2	1.33478	1	1.25592	1.89039	0.64812	0.49879	0.85951	1.09893	0.97885	0.64632	1.48978	1.23117	0.393	0.393	0.393	0.393	0.20478	0.20478	0.20478	0.20478	0.75484	0.75484	0.75484	0.75484	0.7798	0.5706	0.2655	0.2202	0.3748	0.0658	0.4294	0.6252	0.2792	0.7345	0.9342	0.7208	0.17	0.21	TRUE	-0.121361
62d11_020_806	NCU04205.2	1.09882	1	1.13535	1.0036	0.14111	0.1287	0.14458	0.13358	0.15136	0.1445	0.15254	0.14632	0.09943	0.09943	0.09943	0.09943	0.04399	0.04399	0.04399	0.04399	0.14146	0.14146	0.14146	0.14146	0.8523	0.345	0.8132	0.1477	0.1156	0.4767	0.655	0.8844	0.9012	0.1868	0.5233	0.0988	0.22	0.19	TRUE	7.01944
62d11_030_552	NCU04206.2	1.03272	1	1.11936	1.06397	0.17958	0.1814	0.19896	0.19307	0.20282	0.19555	0.20909	0.20742	0.13851	0.13851	0.13851	0.13851	0.062	0.062	0.062	0.062	0.19089	0.19089	0.19089	0.19089	0.6126	0.2482	0.4097	0.3874	0.2131	0.2993	0.7518	0.7869	0.6583	0.5903	0.7007	0.3417	0.28	0.25	TRUE	5.49662
64c2_170_1547	NCU09681.2	1.15841	1	1.19339	1.06008	0.171	0.15821	0.17217	0.16189	0.17535	0.16479	0.18455	0.18104	0.11239	0.11239	0.11239	0.11239	0.04911	0.04911	0.04911	0.04911	0.16482	0.16482	0.16482	0.16482	0.9124	0.3742	0.782	0.0876	0.0779	0.2761	0.6258	0.9221	0.87	0.218	0.7239	0.13	0.24	0.21	TRUE	6.90606
65e11_020_171	NCU01299.2	1.02126	1	1.1325	1.10657	0.19833	0.20811	0.21422	0.2162	0.22461	0.22931	0.24248	0.23217	0.1507	0.1507	0.1507	0.1507	0.0662	0.0662	0.0662	0.0662	0.21008	0.21008	0.21008	0.21008	0.5726	0.2174	0.2952	0.4274	0.2147	0.2227	0.7826	0.7853	0.5634	0.7048	0.7773	0.4366	0.3	0.27	TRUE	4.50138
65e11_130_1749	NCU01311.2	1.13259	1	1.31326	1.06734	0.3897	0.36779	0.60429	0.50216	0.43117	0.41632	0.74999	0.67125	0.25873	0.25873	0.25873	0.25873	0.13107	0.13107	0.13107	0.13107	0.44593	0.44593	0.44593	0.44593	0.7019	0.2965	0.5784	0.2981	0.2243	0.3901	0.7035	0.7757	0.6879	0.4216	0.6099	0.3121	0.47	0.45	TRUE	1.62411
65e11_140_861	NCU01312.2	1.83437	1	1.68238	1.11104	0.52236	0.30935	0.56057	0.39142	0.52002	0.40822	0.56598	0.56088	0.24032	0.24032	0.24032	0.24032	0.11085	0.11085	0.11085	0.11085	0.35151	0.35151	0.35151	0.35151	0.9867	0.6693	0.9433	0.0133	0.0495	0.311	0.3307	0.9505	0.9098	0.0567	0.689	0.0902	0.43	0.4	TRUE	-0.905274
65e11_170_221	NCU01314.2	1.33663	1	1.67178	1.03643	0.28133	0.23711	0.37912	0.26925	0.3112	0.28667	0.35834	0.32979	0.15733	0.15733	0.15733	0.15733	0.07616	0.07616	0.07616	0.07616	0.26753	0.26753	0.26753	0.26753	0.9526	0.0796	0.9065	0.0474	0.0181	0.3921	0.9204	0.9819	0.9783	0.0935	0.6079	0.0217	0.32	0.3	TRUE	5.3385
6nc100_010_1071	NCU07062.2	1.07529	1	1.09864	1.03033	0.30687	0.26313	0.31357	0.26148	0.34748	0.29808	0.36633	0.30243	0.19632	0.19632	0.19632	0.19632	0.09116	0.09116	0.09116	0.09116	0.31145	0.31145	0.31145	0.31145	0.6599	0.4688	0.579	0.3401	0.3279	0.4257	0.5312	0.6721	0.6379	0.421	0.5743	0.3621	0.39	0.35	TRUE	3.13346
6nc100_040_1282	NCU07064.2b	1.07566	1	1.10404	1.08339	0.19815	0.17995	0.20962	0.19841	0.2157	0.21168	0.2156	0.22963	0.1425	0.1425	0.1425	0.1425	0.06236	0.06236	0.06236	0.06236	0.19669	0.19669	0.19669	0.19669	0.7264	0.4171	0.4806	0.2736	0.2479	0.2625	0.5829	0.7521	0.5586	0.5194	0.7375	0.4414	0.29	0.26	TRUE	5.53641
6nc100_150_227	NCU07074.2	1.40914	1	1.02608	1.10322	0.30689	0.22731	0.23252	0.26318	0.31897	0.26639	0.27054	0.29827	0.18337	0.18337	0.18337	0.18337	0.07995	0.07995	0.07995	0.07995	0.23672	0.23672	0.23672	0.23672	0.9637	0.9608	0.8947	0.0363	0.4402	0.2723	0.0392	0.5598	0.3321	0.1053	0.7277	0.6679	0.35	0.31	TRUE	3.53729
6nc100_170_1564	NCU07076.2	1.10032	1	1.053	1.00633	0.35691	0.32311	0.32164	0.30738	0.40321	0.39407	0.41173	0.39754	0.2731	0.2731	0.2731	0.2731	0.11462	0.11462	0.11462	0.11462	0.30894	0.30894	0.30894	0.30894	0.6443	0.5793	0.6285	0.3557	0.4197	0.4752	0.4207	0.5803	0.5794	0.3715	0.5248	0.4206	0.46	0.42	TRUE	-2.90567
6nc100_210_404	NCU07080.2	1.09307	1	1.13271	1.01811	0.27017	0.26647	0.29213	0.26803	0.32864	0.30305	0.33163	0.30342	0.21319	0.21319	0.21319	0.21319	0.09282	0.09282	0.09282	0.09282	0.26292	0.26292	0.26292	0.26292	0.6893	0.4256	0.6276	0.3107	0.283	0.4675	0.5744	0.717	0.7055	0.3724	0.5325	0.2945	0.39	0.35	TRUE	2.57279
6nc100_240_1615	NCU07083.2	1.10953	1	1.0832	1.12022	0.27449	0.25865	0.27216	0.2862	0.31396	0.28262	0.31979	0.3139	0.20428	0.20428	0.20428	0.20428	0.08926	0.08926	0.08926	0.08926	0.25786	0.25786	0.25786	0.25786	0.7269	0.553	0.4819	0.2731	0.3443	0.2675	0.447	0.6557	0.4223	0.5181	0.7325	0.5777	0.38	0.34	TRUE	2.89249
6nc100_260_388	6nc100_260	1.05631	1	1.118	1.03468	0.27033	0.25922	0.28623	0.27938	0.31459	0.30508	0.33088	0.32143	0.21304	0.21304	0.21304	0.21304	0.09238	0.09238	0.09238	0.09238	0.26574	0.26574	0.26574	0.26574	0.6199	0.3711	0.5418	0.3801	0.2982	0.4269	0.6289	0.7018	0.6584	0.4582	0.5731	0.3416	0.39	0.35	TRUE	2.58641
6nc105_020_296	NCU07090.2	1.24732	1	1.28985	1.18527	0.35887	0.30995	0.38183	0.36308	0.42913	0.40158	0.43215	0.42267	0.25783	0.25783	0.25783	0.25783	0.11089	0.11089	0.11089	0.11089	0.3031	0.3031	0.3031	0.3031	0.8345	0.429	0.5762	0.1655	0.1726	0.2375	0.571	0.8274	0.6427	0.4238	0.7625	0.3573	0.44	0.4	TRUE	1.16638
6nc105_070_143	NCU07097.2	1.89154	1	1.85608	1.38872	0.63987	0.35845	0.82001	0.69664	0.54898	0.46007	0.75766	1.18013	0.18181	0.18181	0.18181	0.18181	0.11298	0.11298	0.11298	0.11298	0.53302	0.53302	0.53302	0.53302	0.9818	0.5504	0.83	0.0182	0.0449	0.1257	0.4496	0.9551	0.7883	0.17	0.8743	0.2117	0.41	0.39	TRUE	4.04342
6nc105_190_171	6nc105_190	1.60286	1	1.31022	1.11557	0.27769	0.19475	0.23238	0.20351	0.28441	0.22805	0.25029	0.24723	0.14515	0.14515	0.14515	0.14515	0.06333	0.06333	0.06333	0.06333	0.19363	0.19363	0.19363	0.19363	0.9941	0.9323	0.9764	0.0059	0.0524	0.1918	0.0677	0.9476	0.8868	0.0236	0.8082	0.1132	0.28	0.26	TRUE	4.59616
6nc105_200_84	6nc105_200	1.12965	1	1.02936	1.12245	0.22002	0.22367	0.20408	0.2547	0.2344	0.26154	0.22132	0.26275	0.13632	0.13632	0.13632	0.13632	0.06665	0.06665	0.06665	0.06665	0.24968	0.24968	0.24968	0.24968	0.8308	0.7775	0.518	0.1692	0.4198	0.2267	0.2225	0.5802	0.2458	0.482	0.7733	0.7542	0.3	0.27	TRUE	4.80107
6nc110_020_15297	NCU07119.2	1.1727	1	1.48701	1.01961	0.21906	0.19092	0.28677	0.20784	0.20932	0.22395	0.27663	0.26385	0.12628	0.12628	0.12628	0.12628	0.06162	0.06162	0.06162	0.06162	0.24838	0.24838	0.24838	0.24838	0.8901	0.0426	0.8331	0.1099	0.0197	0.4385	0.9574	0.9803	0.9737	0.1669	0.5615	0.0263	0.28	0.25	TRUE	6.68283
6nc110_150_494	NCU07133.2	3.24122	1	1.46342	2.6305	1.16608	0.47809	0.54557	1.4691	1.12645	0.92796	0.68247	1.63435	0.23127	0.23127	0.23127	0.23127	0.13574	0.13574	0.13574	0.13574	0.53744	0.53744	0.53744	0.53744	0.9961	0.9908	0.7301	0.0039	0.1403	0.0549	0.0092	0.8597	0.0739	0.2699	0.9451	0.9261	0.43	0.45	TRUE	2.56764
6nc110_200_1237	6nc110_200	1.40995	1	2.91124	1.09264	0.49229	0.3128	0.76867	0.29028	0.69283	0.46653	0.60986	0.41622	0.18739	0.18739	0.18739	0.18739	0.10011	0.10011	0.10011	0.10011	0.3801	0.3801	0.3801	0.3801	0.916	0.019	0.8531	0.084	0.0028	0.2949	0.981	0.9972	0.9984	0.1469	0.7051	0.0016	0.35	0.37	TRUE	4.98827
6nc123_040_5681	NCU04692.2	1.47071	1	1.13791	1.10532	0.35227	0.25901	0.31386	0.31874	0.37609	0.31145	0.36101	0.38666	0.19356	0.19356	0.19356	0.19356	0.09102	0.09102	0.09102	0.09102	0.29181	0.29181	0.29181	0.29181	0.9643	0.916	0.8952	0.0357	0.2746	0.2888	0.084	0.7254	0.5474	0.1048	0.7112	0.4526	0.38	0.35	TRUE	3.42619
6nc125_010_610	NCU04693.2a	1.07785	1	1.12307	1.07551	0.13855	0.13167	0.14176	0.14122	0.14918	0.14018	0.14409	0.14612	0.09299	0.09299	0.09299	0.09299	0.04124	0.04124	0.04124	0.04124	0.15317	0.15317	0.15317	0.15317	0.8165	0.3051	0.5158	0.1835	0.1225	0.1853	0.6949	0.8775	0.7021	0.4842	0.8147	0.2979	0.2	0.18	TRUE	8.74055
6nc125_040_708	NCU04695.2	1.07571	1	1.08492	1.01296	0.24053	0.23008	0.2505	0.23851	0.26901	0.25442	0.27856	0.28361	0.18438	0.18438	0.18438	0.18438	0.08252	0.08252	0.08252	0.08252	0.24464	0.24464	0.24464	0.24464	0.6786	0.4826	0.6303	0.3214	0.3301	0.4644	0.5174	0.6699	0.666	0.3697	0.5356	0.334	0.35	0.31	TRUE	3.72437
6nc132_010_17	NCU04719.2	1.27988	1	1.16245	1.02649	0.2358	0.16643	0.17744	0.15228	0.23324	0.16331	0.19402	0.16312	0.08239	0.08239	0.08239	0.08239	0.04559	0.04559	0.04559	0.04559	0.22327	0.22327	0.22327	0.22327	0.9636	0.821	0.9466	0.0364	0.0879	0.3631	0.179	0.9121	0.9214	0.0534	0.6369	0.0786	0.22	0.2	TRUE	9.13032
6nc132_070_811	NCU04725.2	1.29727	1	1.10457	1.02536	0.14879	0.11519	0.12474	0.11768	0.13878	0.12402	0.13038	0.128	0.0856	0.0856	0.0856	0.0856	0.03861	0.03861	0.03861	0.03861	0.12787	0.12787	0.12787	0.12787	0.9922	0.9586	0.9801	0.0078	0.1317	0.3628	0.0414	0.8683	0.8377	0.0199	0.6372	0.1623	0.19	0.17	TRUE	9.10564
6nc138_020_1715	NCU04789.2	1.17352	1	1.16009	1.20842	0.35286	0.31039	0.31898	0.33514	0.42108	0.39723	0.36328	0.3904	0.21872	0.21872	0.21872	0.21872	0.10313	0.10313	0.10313	0.10313	0.33066	0.33066	0.33066	0.33066	0.7542	0.5236	0.4459	0.2458	0.2674	0.1813	0.4764	0.7326	0.4104	0.5541	0.8187	0.5896	0.42	0.38	TRUE	2.85791
6nc138_040_918	NCU04791.2	1.71575	1	1.1538	1.07411	0.29982	0.19741	0.22576	0.21319	0.30212	0.22378	0.25222	0.2433	0.15321	0.15321	0.15321	0.15321	0.06745	0.06745	0.06745	0.06745	0.2071	0.2071	0.2071	0.2071	0.9969	0.9863	0.9902	0.0031	0.1807	0.2874	0.0137	0.8193	0.7111	0.0098	0.7126	0.2889	0.29	0.27	TRUE	3.58672
6nc138_070_964	NCU04794.2	1.07078	1	1.07372	1.05492	0.29392	0.27753	0.29828	0.3072	0.3377	0.32984	0.35647	0.37242	0.24051	0.24051	0.24051	0.24051	0.10323	0.10323	0.10323	0.10323	0.28112	0.28112	0.28112	0.28112	0.634	0.4935	0.5251	0.366	0.3812	0.4017	0.5065	0.6188	0.5332	0.4749	0.5983	0.4668	0.42	0.38	TRUE	1.71171
6nc138_090_476	NCU04796.2	2.54325	1	1.44296	1.03168	0.33816	0.17869	0.24928	0.18125	0.30487	0.21507	0.26385	0.2239	0.12464	0.12464	0.12464	0.12464	0.05667	0.05667	0.05667	0.05667	0.18607	0.18607	0.18607	0.18607	0.9998	0.9983	0.9995	0.0002	0.0179	0.3876	0.0017	0.9821	0.9861	0.0005	0.6124	0.0139	0.23	0.23	TRUE	5.9514
6nc138_100_7	NCU04797.2	2.03027	1	1.34218	1.34368	0.23926	0.1358	0.18596	0.19127	0.2429	0.16359	0.18573	0.20709	0.1006	0.1006	0.1006	0.1006	0.04495	0.04495	0.04495	0.04495	0.15215	0.15215	0.15215	0.15215	0.9994	0.9982	0.996	0.0006	0.0165	0.0083	0.0018	0.9835	0.4832	0.004	0.9917	0.5168	0.21	0.19	TRUE	7.15017
6nc138_130_3356	NCU04800.2	1.17713	1	1.23707	1.03846	0.16678	0.15348	0.16603	0.15295	0.17815	0.1659	0.18669	0.16469	0.10862	0.10862	0.10862	0.10862	0.04683	0.04683	0.04683	0.04683	0.16264	0.16264	0.16264	0.16264	0.936	0.2878	0.8612	0.064	0.0468	0.3351	0.7122	0.9532	0.9519	0.1388	0.6649	0.0481	0.23	0.2	TRUE	7.25684
6nc138_150_572	NCU04802.2	2.64104	1	1.79478	1.04987	0.35262	0.17206	0.26475	0.19121	0.34156	0.21125	0.27847	0.22777	0.11939	0.11939	0.11939	0.11939	0.05378	0.05378	0.05378	0.05378	0.17432	0.17432	0.17432	0.17432	1	0.994	0.9997	0	0.0018	0.3254	0.006	0.9982	0.9984	0.0003	0.6746	0.0016	0.22	0.22	TRUE	5.93714
6nc138_320_825	NCU04819.2a	1.7935	1	1.04299	1.05668	0.82815	0.43475	0.47937	0.49388	0.79201	0.61741	0.7103	0.65111	0.28386	0.28386	0.28386	0.28386	0.16324	0.16324	0.16324	0.16324	0.658	0.658	0.658	0.658	0.9205	0.9184	0.8909	0.0795	0.453	0.4177	0.0816	0.547	0.4788	0.1091	0.5823	0.5212	0.24	0.3	TRUE	2.02476
6nc140_070_756	NCU04830.2	1.14846	1	1.2073	1.52065	0.35565	0.31015	0.37557	0.48934	0.44806	0.39754	0.46698	0.53317	0.27766	0.27766	0.27766	0.27766	0.11409	0.11409	0.11409	0.11409	0.30685	0.30685	0.30685	0.30685	0.726	0.4157	0.1703	0.274	0.2529	0.0586	0.5843	0.7471	0.2006	0.8297	0.9414	0.7994	0.46	0.42	TRUE	-2.59558
6nc140_160_1911	6nc140_160	1.07793	1	1.20452	1.08399	0.11643	0.11305	0.12641	0.11833	0.12366	0.12172	0.13221	0.12333	0.08053	0.08053	0.08053	0.08053	0.03621	0.03621	0.03621	0.03621	0.1243	0.1243	0.1243	0.1243	0.8489	0.0776	0.4711	0.1511	0.0348	0.1385	0.9224	0.9652	0.9128	0.5289	0.8615	0.0872	0.18	0.16	TRUE	10.0109
6nc140_220_2621	NCU04848.2	1.66101	1	1.19874	1.14407	0.43591	0.30313	0.37458	0.40372	0.4346	0.38043	0.39454	0.52158	0.19854	0.19854	0.19854	0.19854	0.1022	0.1022	0.1022	0.1022	0.36439	0.36439	0.36439	0.36439	0.9801	0.9425	0.9194	0.0199	0.2229	0.2755	0.0575	0.7771	0.5968	0.0806	0.7245	0.4032	0.41	0.38	TRUE	2.48075
6nc140_230_2118	NCU04850.2	1.10904	1	1.09145	1.47469	0.21886	0.18799	0.20865	0.26493	0.24049	0.22082	0.22965	0.28388	0.14931	0.14931	0.14931	0.14931	0.06491	0.06491	0.06491	0.06491	0.19834	0.19834	0.19834	0.19834	0.7886	0.5469	0.0476	0.2114	0.2747	0.0124	0.4531	0.7253	0.0311	0.9524	0.9876	0.9689	0.3	0.27	TRUE	4.92447
6nc270_010_1764	NCU09788.2	1.16797	1	1.14192	1.1589	0.1795	0.15713	0.1846	0.17632	0.20286	0.17946	0.18275	0.19118	0.12187	0.12187	0.12187	0.12187	0.05438	0.05438	0.05438	0.05438	0.1657	0.1657	0.1657	0.1657	0.911	0.5892	0.5294	0.089	0.1529	0.0973	0.4108	0.8471	0.4343	0.4706	0.9027	0.5657	0.25	0.23	TRUE	5.84186
6nc270_080_613	NCU09795.2	1.73539	1	1.48003	1.1446	0.84247	0.43695	0.50116	0.40068	0.9218	0.64981	0.48301	0.47447	0.18433	0.18433	0.18433	0.18433	0.11065	0.11065	0.11065	0.11065	0.52167	0.52167	0.52167	0.52167	0.8993	0.7398	0.8801	0.1007	0.0953	0.2278	0.2602	0.9047	0.8957	0.1199	0.7722	0.1043	0.4	0.4	TRUE	3.48465
6nc290_010_4431	NCU09869.2	1.09807	1	1.08797	1.00506	0.20953	0.18579	0.21302	0.20043	0.22399	0.22933	0.22189	0.22417	0.14944	0.14944	0.14944	0.14944	0.06623	0.06623	0.06623	0.06623	0.20448	0.20448	0.20448	0.20448	0.7564	0.5207	0.7194	0.2436	0.297	0.4823	0.4793	0.703	0.7222	0.2806	0.5177	0.2778	0.3	0.27	TRUE	5.22644
6nc290_060_884	NCU09873.2	1.38354	1	2.24029	1.46553	0.26251	0.20555	0.38523	0.27719	0.29602	0.25514	0.36213	0.30399	0.14642	0.14642	0.14642	0.14642	0.06364	0.06364	0.06364	0.06364	0.2069	0.2069	0.2069	0.2069	0.9795	0.0054	0.3444	0.0205	0.0007	0.0127	0.9946	0.9993	0.9912	0.6556	0.9873	0.0088	0.28	0.26	TRUE	4.23283
6nc350_020_1171	6nc350_020	1.08096	1	1.08415	1.0254	0.22375	0.21764	0.23306	0.22228	0.24681	0.2303	0.25361	0.2465	0.16852	0.16852	0.16852	0.16852	0.07397	0.07397	0.07397	0.07397	0.22999	0.22999	0.22999	0.22999	0.7128	0.49	0.628	0.2872	0.3127	0.427	0.51	0.6873	0.6524	0.372	0.573	0.3476	0.32	0.29	TRUE	4.37345
6nc350_060_1359	NCU05492.2	1.12368	1	1.062	1.00298	0.17259	0.15427	0.17317	0.16423	0.18626	0.17329	0.168	0.16703	0.11832	0.11832	0.11832	0.11832	0.05286	0.05286	0.05286	0.05286	0.17176	0.17176	0.17176	0.17176	0.8599	0.7141	0.8249	0.1401	0.3049	0.4902	0.2859	0.6951	0.7098	0.1751	0.5098	0.2902	0.25	0.22	TRUE	6.97651
6nc350_080_1900	NCU05493.2	4.79491	1	4.40137	1.63224	1.44079	0.3808	1.28743	0.5766	1.32869	0.62179	1.33151	1.00201	0.28308	0.28308	0.28308	0.28308	0.1194	0.1194	0.1194	0.1194	0.33516	0.33516	0.33516	0.33516	0.9999	0.6339	0.9962	0.0001	0.001	0.044	0.3661	0.999	0.9947	0.0038	0.956	0.0053	0.37	0.43	TRUE	-0.286025
6nc350_150_1235	NCU05500.2	1.3098	1	1.11574	1.20142	0.41371	0.34205	0.39495	0.48134	0.43738	0.44629	0.45098	0.58972	0.24218	0.24218	0.24218	0.24218	0.12517	0.12517	0.12517	0.12517	0.42122	0.42122	0.42122	0.42122	0.8802	0.7623	0.6157	0.1198	0.3396	0.2521	0.2377	0.6604	0.3968	0.3843	0.7479	0.6032	0.46	0.43	TRUE	2.41609
6nc350_170_3884	NCU05502.2a	1.24221	1	1.32438	1.00714	0.40767	0.35375	0.52635	0.40606	0.49075	0.47315	0.54084	0.56538	0.29952	0.29952	0.29952	0.29952	0.13597	0.13597	0.13597	0.13597	0.38165	0.38165	0.38165	0.38165	0.7887	0.4141	0.7413	0.2113	0.2052	0.4805	0.5859	0.7948	0.8001	0.2587	0.5195	0.1999	0.15	0.47	TRUE	0.744288
6nc350_220_167	NCU05507.2	1.2039	1	1.02171	1.00916	0.39413	0.32464	0.46199	0.41679	0.35005	0.32037	0.67061	0.49145	0.16308	0.16308	0.16308	0.16308	0.10138	0.10138	0.10138	0.10138	0.50493	0.50493	0.50493	0.50493	0.8554	0.774	0.7795	0.1446	0.4713	0.4818	0.226	0.5287	0.5162	0.2205	0.5182	0.4838	0.4	0.37	TRUE	5.2235
6nc350_330_1603	NCU05518.2	1.21506	1	1.50386	1.54063	0.14967	0.13918	0.16286	0.1961	0.15723	0.15699	0.16928	0.19192	0.07589	0.07589	0.07589	0.07589	0.03692	0.03692	0.03692	0.03692	0.15202	0.15202	0.15202	0.15202	0.9765	0.0171	0.0238	0.0235	0.0045	0.0032	0.9829	0.9955	0.3589	0.9762	0.9968	0.6411	0.18	0.17	TRUE	9.79519
6nc350_480_435	NCU05534.2	1.09617	1	1.16228	1.0022	0.06263	0.0598	0.06541	0.05977	0.06758	0.0623	0.06626	0.06289	0.04313	0.04313	0.04313	0.04313	0.01959	0.01959	0.01959	0.01959	0.06881	0.06881	0.06881	0.06881	0.9752	0.0761	0.9604	0.0248	0.0081	0.4733	0.9239	0.9919	0.9952	0.0396	0.5267	0.0048	0.31	0.16	TRUE	14.6378
6nc350_510_1179	NCU05537.2	1.05793	1	1.07887	1.03048	0.07597	0.07291	0.07906	0.07479	0.0804	0.07731	0.08005	0.07719	0.05262	0.05262	0.05262	0.05262	0.02386	0.02386	0.02386	0.02386	0.08357	0.08357	0.08357	0.08357	0.8702	0.327	0.6962	0.1298	0.1024	0.26	0.673	0.8976	0.8335	0.3038	0.74	0.1665	0.41	0.4	TRUE	12.7247
6nc360_010_248	NCU05539.2	1.47429	1	1.49808	1.12646	0.55302	0.38946	0.68496	0.62891	0.49544	0.5222	0.71117	1.03663	0.22844	0.22844	0.22844	0.22844	0.1361	0.1361	0.1361	0.1361	0.54898	0.54898	0.54898	0.54898	0.9196	0.4707	0.7643	0.0804	0.119	0.3467	0.5293	0.881	0.748	0.2357	0.6533	0.252	0.47	0.45	TRUE	2.90995
6nc360_170_941	NCU05555.2	1.25571	1	1.3522	1.10422	0.30546	0.28711	0.32696	0.31022	0.3483	0.35885	0.3494	0.35944	0.18973	0.18973	0.18973	0.18973	0.09101	0.09101	0.09101	0.09101	0.29562	0.29562	0.29562	0.29562	0.885	0.3231	0.7398	0.115	0.0957	0.3247	0.6769	0.9043	0.8799	0.2602	0.6753	0.1201	0.38	0.34	TRUE	3.02385
6nc360_180_61	NCU05556.2	1.07815	1	1.05052	1.03221	0.17676	0.16176	0.17563	0.17343	0.19777	0.18664	0.18785	0.18621	0.12881	0.12881	0.12881	0.12881	0.05708	0.05708	0.05708	0.05708	0.17678	0.17678	0.17678	0.17678	0.7497	0.5914	0.6383	0.2503	0.3487	0.3909	0.4086	0.6513	0.5601	0.3617	0.6091	0.4399	0.27	0.24	TRUE	6.32144
6nc360_240_1664	NCU05563.2	1.11493	1	1.09679	1.06585	0.25208	0.24143	0.2593	0.25543	0.28762	0.27557	0.2888	0.29304	0.19729	0.19729	0.19729	0.19729	0.08611	0.08611	0.08611	0.08611	0.23399	0.23399	0.23399	0.23399	0.7438	0.5398	0.5904	0.2562	0.3126	0.3512	0.4602	0.6874	0.5733	0.4096	0.6488	0.4267	0.37	0.33	TRUE	3.01366
6nc360_290_104	NCU05568.2	1.70893	1	1.04923	1.03546	0.53141	0.34406	0.37097	0.35768	0.51898	0.41521	0.4438	0.49595	0.21856	0.21856	0.21856	0.21856	0.11369	0.11369	0.11369	0.11369	0.42989	0.42989	0.42989	0.42989	0.9771	0.9538	0.9409	0.0229	0.43	0.4417	0.0462	0.57	0.5102	0.0591	0.5583	0.4898	0.42	0.41	TRUE	1.78442
6nc360_450_104	NCU05583.2	1.63055	1	1.22803	1.05806	0.61993	0.30331	0.57439	0.3259	0.61576	0.3353	0.74508	0.38225	0.15381	0.15381	0.15381	0.15381	0.09706	0.09706	0.09706	0.09706	0.50117	0.50117	0.50117	0.50117	0.9739	0.8222	0.9334	0.0261	0.2178	0.3464	0.1778	0.7822	0.7589	0.0666	0.6536	0.2411	0.37	0.35	TRUE	5.62041
6nc360_470_1191	NCU05585.2	1.34737	1	1.21531	1.02585	0.10772	0.08696	0.09543	0.09428	0.11177	0.09066	0.10101	0.09239	0.06122	0.06122	0.06122	0.06122	0.02763	0.02763	0.02763	0.02763	0.09401	0.09401	0.09401	0.09401	0.9991	0.9492	0.9959	0.0009	0.0107	0.3108	0.0508	0.9893	0.9891	0.0041	0.6892	0.0109	0.35	0.32	TRUE	11.8222
6nc360_480_620	NCU05586.2	1.42833	1	1.37893	1.41793	0.4105	0.29384	0.52158	0.52253	0.40235	0.33928	0.59295	0.66935	0.18192	0.18192	0.18192	0.18192	0.0953	0.0953	0.0953	0.0953	0.36787	0.36787	0.36787	0.36787	0.9445	0.5904	0.5145	0.0555	0.1291	0.0527	0.4096	0.8709	0.4677	0.4855	0.9473	0.5323	0.39	0.36	TRUE	3.94565
6nc360_550_900	NCU05594.2	1.12953	1	2.09655	1.09386	0.27079	0.24822	0.44543	0.26966	0.31775	0.32119	0.4075	0.34471	0.19054	0.19054	0.19054	0.19054	0.08218	0.08218	0.08218	0.08218	0.2427	0.2427	0.2427	0.2427	0.7694	0.0053	0.5678	0.2306	0.005	0.2899	0.9947	0.995	0.9947	0.4322	0.7101	0.0053	0.34	0.32	TRUE	3.39838
6nc360_570_1701	NCU05596.2	1.1497	1	1.1066	1.21234	0.26088	0.23525	0.24672	0.27709	0.29585	0.26753	0.28171	0.29674	0.18248	0.18248	0.18248	0.18248	0.08091	0.08091	0.08091	0.08091	0.24802	0.24802	0.24802	0.24802	0.8107	0.5906	0.3845	0.1893	0.2935	0.1345	0.4094	0.7065	0.2807	0.6155	0.8655	0.7193	0.35	0.31	TRUE	3.32816
6nc360_590_1506	NCU05598.2	1.76736	1	5.39212	1.24058	0.20476	0.13496	0.37356	0.15134	0.23867	0.163	0.30787	0.17641	0.08001	0.08001	0.08001	0.08001	0.03573	0.03573	0.03573	0.03573	0.1152	0.1152	0.1152	0.1152	0.9996	0	0.9972	0.0004	0	0.0142	1	1	1	0.0028	0.9858	0	0.37	0.15	TRUE	9.63009
6nc365_030_286	NCU05622.2b	1.3148	1	1.00055	1.1489	0.65462	0.5024	0.58923	0.77863	0.72444	0.69361	0.89697	1.15163	0.3912	0.3912	0.3912	0.3912	0.20131	0.20131	0.20131	0.20131	0.75276	0.75276	0.75276	0.75276	0.7449	0.7932	0.5995	0.2551	0.5033	0.3855	0.2068	0.4967	0.4198	0.4005	0.6145	0.5802	0.16	0.18	TRUE	-0.769395
6nc370_030_177	NCU05639.2	1.52811	1	1.14778	1.57516	0.72582	0.58952	0.54333	1.00778	0.7569	0.99068	0.66952	1.38448	0.35029	0.35029	0.35029	0.35029	0.18875	0.18875	0.18875	0.18875	0.69951	0.69951	0.69951	0.69951	0.8692	0.8206	0.4772	0.1308	0.3821	0.2385	0.1794	0.6179	0.2466	0.5228	0.7615	0.7534	0.18	0.24	TRUE	0.563673
6nc370_130_970	NCU05649.2	1.21388	1	1.25292	1.09106	0.17148	0.14465	0.17402	0.15581	0.17355	0.16046	0.18372	0.17101	0.10465	0.10465	0.10465	0.10465	0.04701	0.04701	0.04701	0.04701	0.1577	0.1577	0.1577	0.1577	0.9585	0.3682	0.8428	0.0415	0.0388	0.1803	0.6318	0.9612	0.9136	0.1572	0.8197	0.0864	0.22	0.2	TRUE	7.89856
6nc376_070_1617	NCU03855.2	1.29549	1	1.08619	1.09383	0.27064	0.20548	0.28101	0.34125	0.21542	0.19399	0.30651	0.41649	0.06792	0.06792	0.06792	0.06792	0.04561	0.04561	0.04561	0.04561	0.38208	0.38208	0.38208	0.38208	0.9708	0.9405	0.8706	0.0292	0.214	0.1966	0.0595	0.786	0.4749	0.1294	0.8034	0.5251	0.23	0.21	TRUE	10.2083
6nc380_010_1787	NCU03866.2	1.71706	1	1.22827	1.18039	0.70038	0.41725	0.71382	0.60194	0.65172	0.50527	1.05384	0.86225	0.27657	0.27657	0.27657	0.27657	0.1568	0.1568	0.1568	0.1568	0.62626	0.62626	0.62626	0.62626	0.9531	0.8246	0.8315	0.0469	0.3139	0.2626	0.1754	0.6861	0.527	0.1685	0.7374	0.473	0.25	0.15	TRUE	1.33959
6nc380_080_88	NCU03873.2	1.72423	1	1.21193	1.68902	0.21382	0.13423	0.15266	0.21321	0.22295	0.15571	0.17044	0.22181	0.0966	0.0966	0.0966	0.0966	0.04355	0.04355	0.04355	0.04355	0.14443	0.14443	0.14443	0.14443	0.9994	0.995	0.5927	0.0006	0.0465	0.0007	0.005	0.9535	0.0056	0.4073	0.9993	0.9944	0.2	0.18	TRUE	7.7387
6nc380_090_428	NCU03874.2	1.27839	1	1.35108	1.11221	0.1663	0.14491	0.17402	0.14973	0.17807	0.16129	0.17884	0.17112	0.10115	0.10115	0.10115	0.10115	0.04602	0.04602	0.04602	0.04602	0.14672	0.14672	0.14672	0.14672	0.9805	0.2645	0.8963	0.0195	0.0135	0.1294	0.7355	0.9865	0.9633	0.1037	0.8706	0.0367	0.22	0.19	TRUE	7.53726
6nc380_150_53	NCU03881.2	1.51479	1	1.2771	1.062	0.35427	0.25053	0.38515	0.42377	0.2805	0.26567	0.41953	0.55458	0.09811	0.09811	0.09811	0.09811	0.06487	0.06487	0.06487	0.06487	0.41741	0.41741	0.41741	0.41741	0.9793	0.9045	0.9318	0.0207	0.0901	0.3262	0.0955	0.9099	0.8201	0.0682	0.6738	0.1799	0.29	0.26	TRUE	7.9869
6nc385_090_2961	NCU03892.2	1.0399	1	1.09866	1.04851	0.21922	0.22061	0.22562	0.21951	0.24075	0.23112	0.25503	0.24818	0.16682	0.16682	0.16682	0.16682	0.0739	0.0739	0.0739	0.0739	0.22729	0.22729	0.22729	0.22729	0.6074	0.3391	0.4829	0.3926	0.2861	0.3617	0.6609	0.7139	0.6197	0.5171	0.6383	0.3803	0.33	0.29	TRUE	4.05745
6nc390_030_372	NCU10503.2	1.14432	1	1.18778	1.05196	0.13294	0.12473	0.15893	0.146	0.14384	0.13249	0.16213	0.15805	0.08274	0.08274	0.08274	0.08274	0.04116	0.04116	0.04116	0.04116	0.15224	0.15224	0.15224	0.15224	0.9374	0.3006	0.8156	0.0626	0.054	0.2399	0.6994	0.946	0.8875	0.1844	0.7601	0.1125	0.2	0.18	TRUE	8.60659
6nc390_090_1690	NCU03982.2	2.54762	1	5.1456	1.21679	0.28208	0.13233	0.3902	0.14859	0.30446	0.16208	0.34058	0.17612	0.07958	0.07958	0.07958	0.07958	0.03644	0.03644	0.03644	0.03644	0.12413	0.12413	0.12413	0.12413	0.9999	0	0.9993	0.0001	0	0.0178	1	1	1	0.0007	0.9822	0	0.36	0.15	TRUE	9.47048
6nc390_240_2043	NCU03994.2	1.28164	1	1.15618	1.01086	0.29718	0.24565	0.26704	0.24726	0.31949	0.28465	0.29881	0.29067	0.19517	0.19517	0.19517	0.19517	0.08531	0.08531	0.08531	0.08531	0.25	0.25	0.25	0.25	0.9095	0.7307	0.8752	0.0905	0.2303	0.4725	0.2693	0.7697	0.7732	0.1248	0.5275	0.2268	0.36	0.33	TRUE	3.22911
6nc398_070_899	NCU04069.2	1.16445	1	1.18131	1.09057	0.13021	0.11657	0.13469	0.12365	0.13878	0.12699	0.13764	0.13861	0.08624	0.08624	0.08624	0.08624	0.03822	0.03822	0.03822	0.03822	0.12841	0.12841	0.12841	0.12841	0.9591	0.4289	0.773	0.0409	0.047	0.1278	0.5711	0.953	0.8474	0.227	0.8722	0.1526	0.18	0.17	TRUE	8.96998
6nc398_100_148	NCU04072.2	1.16594	1	1.25603	1.01367	0.27334	0.25268	0.39657	0.4056	0.26808	0.27562	0.42993	0.50985	0.1141	0.1141	0.1141	0.1141	0.07344	0.07344	0.07344	0.07344	0.40579	0.40579	0.40579	0.40579	0.8753	0.2486	0.7586	0.1247	0.1171	0.4614	0.7514	0.8829	0.8111	0.2414	0.5386	0.1889	0.32	0.29	TRUE	7.08928
6nc398_110_2488	NCU04073.2a	1.03948	1	1.26939	1.04837	0.2715	0.23639	0.32077	0.23806	0.32214	0.2673	0.34474	0.27421	0.16684	0.16684	0.16684	0.16684	0.0801	0.0801	0.0801	0.0801	0.27514	0.27514	0.27514	0.27514	0.6145	0.1504	0.4801	0.3855	0.1189	0.3753	0.8496	0.8811	0.8762	0.5199	0.6247	0.1238	0.34	0.31	TRUE	3.53464
6nc398_120_2374	NCU04073.2b	1.00582	1	1.08515	1.12964	0.23235	0.23214	0.28018	0.29547	0.26364	0.26777	0.32405	0.32995	0.16841	0.16841	0.16841	0.16841	0.08122	0.08122	0.08122	0.08122	0.28973	0.28973	0.28973	0.28973	0.5153	0.3004	0.2635	0.4847	0.325	0.2212	0.6996	0.675	0.4108	0.7365	0.7788	0.5892	0.35	0.32	TRUE	4.20619
6nc398_210_991	NCU04081.2	1.10539	1	1.14884	1.01722	0.15719	0.15312	0.15917	0.14056	0.1737	0.17041	0.17642	0.16493	0.11189	0.11189	0.11189	0.11189	0.049	0.049	0.049	0.049	0.1605	0.1605	0.1605	0.1605	0.8418	0.3434	0.7665	0.1582	0.1219	0.4264	0.6566	0.8781	0.8845	0.2335	0.5736	0.1155	0.24	0.21	TRUE	7.23817
6nc398_250_572	NCU04084.2	1.08012	1	1.1892	1.06274	0.27091	0.25589	0.29817	0.27732	0.31411	0.29538	0.33552	0.32262	0.21576	0.21576	0.21576	0.21576	0.09231	0.09231	0.09231	0.09231	0.25696	0.25696	0.25696	0.25696	0.6652	0.2946	0.5297	0.3348	0.2107	0.3723	0.7054	0.7893	0.7204	0.4703	0.6277	0.2796	0.39	0.35	TRUE	2.46224
6nc398_300_1259	NCU04089.2	1.09098	1	1.13366	1.01026	0.15202	0.1445	0.16223	0.15049	0.16653	0.15868	0.17771	0.15594	0.10797	0.10797	0.10797	0.10797	0.04801	0.04801	0.04801	0.04801	0.16367	0.16367	0.16367	0.16367	0.8201	0.335	0.7551	0.1799	0.1346	0.4522	0.665	0.8654	0.8732	0.2449	0.5478	0.1268	0.23	0.2	TRUE	7.68092
71b5_110_240	NCU09348.2	1.26354	1	1.38737	1.1992	0.26129	0.21112	0.28046	0.24102	0.28486	0.25198	0.28666	0.27603	0.15779	0.15779	0.15779	0.15779	0.06995	0.06995	0.06995	0.06995	0.22094	0.22094	0.22094	0.22094	0.9328	0.2512	0.6321	0.0672	0.0455	0.109	0.7488	0.9545	0.8413	0.3679	0.891	0.1587	0.31	0.28	TRUE	4.88077
7c14_040_17	NCU03180.2	1.09447	1	1.12927	1.05307	0.22849	0.21247	0.23761	0.2264	0.24627	0.24232	0.2639	0.24981	0.16591	0.16591	0.16591	0.16591	0.07212	0.07212	0.07212	0.07212	0.2137	0.2137	0.2137	0.2137	0.7353	0.4091	0.5876	0.2647	0.2386	0.3579	0.5909	0.7614	0.6833	0.4124	0.6421	0.3167	0.33	0.29	TRUE	4.29848
7c14_110_1161	NCU03173.2	1.10096	1	1.40524	1.15637	0.29271	0.26374	0.39832	0.36292	0.3309	0.32238	0.44892	0.38908	0.2023	0.2023	0.2023	0.2023	0.09337	0.09337	0.09337	0.09337	0.30635	0.30635	0.30635	0.30635	0.703	0.1095	0.4194	0.297	0.0856	0.2189	0.8905	0.9144	0.8014	0.5806	0.7811	0.1986	0.39	0.36	TRUE	2.23207
7c14_120_1650	NCU03172.2	1.07003	1	1.15672	1.1199	0.26238	0.24823	0.29181	0.28098	0.29641	0.29664	0.31763	0.3117	0.20842	0.20842	0.20842	0.20842	0.09114	0.09114	0.09114	0.09114	0.2588	0.2588	0.2588	0.2588	0.6522	0.3264	0.4089	0.3478	0.2483	0.2678	0.6736	0.7517	0.564	0.5911	0.7322	0.436	0.38	0.35	TRUE	2.58744
7c14_140_492	NCU03170.2	1.08663	1	1.15352	1.03554	0.24633	0.22629	0.26465	0.25039	0.27932	0.27115	0.28076	0.28612	0.18774	0.18774	0.18774	0.18774	0.08165	0.08165	0.08165	0.08165	0.2485	0.2485	0.2485	0.2485	0.7052	0.357	0.602	0.2948	0.2254	0.4139	0.643	0.7746	0.7397	0.398	0.5861	0.2603	0.36	0.32	TRUE	3.49529
7f4_170_1654	NCU06697.2	1.13202	1	1.08911	1.14294	0.36139	0.32703	0.35784	0.37827	0.45173	0.40739	0.41911	0.44957	0.28374	0.28374	0.28374	0.28374	0.11995	0.11995	0.11995	0.11995	0.3346	0.3346	0.3346	0.3346	0.7053	0.5505	0.4895	0.2947	0.3783	0.2998	0.4495	0.6217	0.4231	0.5105	0.7002	0.5769	0.47	0.43	TRUE	-0.280844
7f4_260_46	NCU06704.2	2.24282	1	4.4898	1.18058	0.21841	0.11547	0.29971	0.13204	0.2425	0.13965	0.27301	0.14888	0.07375	0.07375	0.07375	0.07375	0.03285	0.03285	0.03285	0.03285	0.10405	0.10405	0.10405	0.10405	1	0	0.9999	0	0	0.0211	1	1	1	0.0001	0.9789	0	0.26	0.42	TRUE	9.60641
7f4_370_2744	NCU06714.2	1.10653	1	1.09936	1.00532	0.31452	0.28145	0.31091	0.28664	0.36338	0.3362	0.35694	0.33949	0.24073	0.24073	0.24073	0.24073	0.10258	0.10258	0.10258	0.10258	0.28465	0.28465	0.28465	0.28465	0.694	0.5093	0.6588	0.306	0.3501	0.4878	0.4907	0.6499	0.6599	0.3412	0.5122	0.3401	0.42	0.38	TRUE	1.49559
7nc200_030_1710	NCU09571.2	1.06389	1	1.13479	1.04682	0.20608	0.1991	0.23255	0.20556	0.23632	0.23261	0.2398	0.2464	0.15841	0.15841	0.15841	0.15841	0.06956	0.06956	0.06956	0.06956	0.21471	0.21471	0.21471	0.21471	0.6773	0.3171	0.5437	0.3227	0.2225	0.3624	0.6829	0.7775	0.7118	0.4563	0.6376	0.2882	0.31	0.28	TRUE	4.45618
7nc200_100_184	NCU09578.2	1.01969	1	1.07267	1.13394	0.14619	0.14206	0.1545	0.1635	0.16475	0.15877	0.15636	0.16613	0.11093	0.11093	0.11093	0.11093	0.04951	0.04951	0.04951	0.04951	0.15695	0.15695	0.15695	0.15695	0.5938	0.3034	0.1821	0.4062	0.2685	0.1118	0.6966	0.7315	0.2792	0.8179	0.8882	0.7208	0.24	0.21	TRUE	6.93673
7nc448_010_274	NCU06019.2	1.12936	1	1.0748	1.13867	0.15183	0.1246	0.14855	0.13432	0.15968	0.13062	0.16251	0.14367	0.07913	0.07913	0.07913	0.07913	0.03885	0.03885	0.03885	0.03885	0.16915	0.16915	0.16915	0.16915	0.9293	0.7201	0.4589	0.0707	0.2018	0.0637	0.2799	0.7982	0.209	0.5411	0.9363	0.791	0.19	0.17	TRUE	9.16232
7nc448_090_1104	NCU06026.2	1.32708	1	3.12933	2.09216	0.55056	0.28556	1.01034	0.52653	1.04157	0.41214	0.75363	0.46773	0.11965	0.11965	0.11965	0.11965	0.07784	0.07784	0.07784	0.07784	0.45899	0.45899	0.45899	0.45899	0.913	0.0279	0.0698	0.087	0.0038	0.0063	0.9721	0.9962	0.9696	0.9302	0.9937	0.0304	0.3	0.3	TRUE	6.66146
7nc448_160_1427	NCU06032.2	3.40766	1	4.51779	1.3844	1.23966	0.53316	1.50182	0.70629	1.40302	1.16435	1.25745	1.2356	0.31078	0.31078	0.31078	0.31078	0.15587	0.15587	0.15587	0.15587	0.50689	0.50689	0.50689	0.50689	0.9919	0.1627	0.9684	0.0081	0.0063	0.2711	0.8373	0.9937	0.9944	0.0316	0.7289	0.0056	0.46	0.16	TRUE	-0.858636
7nc448_170_1569	NCU06033.2	1.27755	1	1.19706	1.05625	0.08683	0.06892	0.07871	0.07401	0.08507	0.07239	0.08526	0.07655	0.04989	0.04989	0.04989	0.04989	0.02235	0.02235	0.02235	0.02235	0.0715	0.0715	0.0715	0.0715	0.9987	0.9094	0.9948	0.0013	0.0062	0.1161	0.0906	0.9938	0.9861	0.0052	0.8839	0.0139	0.25	0.3	TRUE	13.1342
7nc448_180_100	NCU06034.2	1.24925	1	1.60991	1.34215	0.56829	0.40453	0.62763	0.48648	0.77109	0.603	0.6669	0.5664	0.29552	0.29552	0.29552	0.29552	0.14645	0.14645	0.14645	0.14645	0.49373	0.49373	0.49373	0.49373	0.7483	0.2239	0.4157	0.2517	0.1055	0.1458	0.7761	0.8945	0.7463	0.5843	0.8542	0.2537	0.35	0.49	TRUE	-0.310713
7nc448_240_1670	NCU06039.2	1.26173	1	1.14736	1.12169	0.36739	0.29538	0.34318	0.3308	0.40656	0.36809	0.3903	0.43691	0.25267	0.25267	0.25267	0.25267	0.10851	0.10851	0.10851	0.10851	0.30544	0.30544	0.30544	0.30544	0.8501	0.6687	0.6786	0.1499	0.2969	0.3014	0.3313	0.7031	0.5402	0.3214	0.6986	0.4598	0.44	0.39	TRUE	1.2495
7nc450_020_1814	NCU06041.2	1.20295	1	1.42945	1.16005	0.46069	0.41667	0.68003	0.67795	0.49478	0.5104	0.77395	0.97995	0.25089	0.25089	0.25089	0.25089	0.14601	0.14601	0.14601	0.14601	0.56256	0.56256	0.56256	0.56256	0.7753	0.2301	0.5366	0.2247	0.1584	0.3267	0.7699	0.8416	0.6754	0.4634	0.6733	0.3246	0.49	0.47	TRUE	2.54101
7nc450_040_888	NCU06043.2	5.27521	1	5.12073	1.10949	1.65335	0.36491	1.41119	0.42384	1.39526	0.62987	1.60582	0.80864	0.29017	0.29017	0.29017	0.29017	0.12343	0.12343	0.12343	0.12343	0.3339	0.3339	0.3339	0.3339	0.9999	0.5538	0.9989	0.0001	0.0005	0.3335	0.4462	0.9995	0.9994	0.0011	0.6665	0.0006	0.33	0.44	TRUE	-1.13839
7nc450_120_194	7nc450_120	1.38696	1	1.89566	1.0172	0.46561	0.37644	0.68847	0.40337	0.57027	0.48324	0.71594	0.63681	0.29756	0.29756	0.29756	0.29756	0.13407	0.13407	0.13407	0.13407	0.38691	0.38691	0.38691	0.38691	0.8952	0.1422	0.8169	0.1048	0.0432	0.4616	0.8578	0.9568	0.9457	0.1831	0.5384	0.0543	0.48	0.46	TRUE	-1.85215
7nc450_250_2821	NCU06067.2	1.27883	1	1.01896	1.09471	0.20896	0.17287	0.16618	0.18801	0.22523	0.1961	0.18879	0.19621	0.13052	0.13052	0.13052	0.13052	0.05794	0.05794	0.05794	0.05794	0.1908	0.1908	0.1908	0.1908	0.9594	0.9569	0.8663	0.0406	0.4468	0.2151	0.0431	0.5532	0.2623	0.1337	0.7849	0.7377	0.27	0.24	TRUE	5.37655
7nc450_260_3478	NCU06068.2	1.0661	1	1.08533	1.01796	0.05533	0.05272	0.05395	0.05333	0.05613	0.05435	0.05521	0.05501	0.03608	0.03608	0.03608	0.03608	0.01642	0.01642	0.01642	0.01642	0.06094	0.06094	0.06094	0.06094	0.9528	0.2891	0.8787	0.0472	0.0346	0.2857	0.7109	0.9654	0.9504	0.1213	0.7143	0.0496	0.29	0.23	TRUE	15.8484
7nc455_040_521	NCU06083.2	1.02769	1	1.02116	1.1129	0.14969	0.1469	0.15414	0.17221	0.17315	0.16609	0.15737	0.16886	0.11419	0.11419	0.11419	0.11419	0.05023	0.05023	0.05023	0.05023	0.16269	0.16269	0.16269	0.16269	0.6055	0.53	0.2439	0.3945	0.4263	0.1529	0.47	0.5737	0.1981	0.7561	0.8471	0.8019	0.24	0.21	TRUE	6.92634
7nc455_050_1002	NCU06084.2	1.16861	1	1.2148	1.04233	0.13345	0.12167	0.13963	0.12621	0.14353	0.13007	0.13734	0.1278	0.0871	0.0871	0.0871	0.0871	0.03906	0.03906	0.03906	0.03906	0.12366	0.12366	0.12366	0.12366	0.9584	0.3062	0.8815	0.0416	0.0358	0.2861	0.6938	0.9642	0.9562	0.1185	0.7139	0.0438	0.19	0.17	TRUE	8.61769
7nc470_160_554	NCU06111.2	1.3428	1	1.30849	1.10449	0.17004	0.12832	0.16615	0.14864	0.17393	0.15258	0.16584	0.16127	0.09719	0.09719	0.09719	0.09719	0.0431	0.0431	0.0431	0.0431	0.13483	0.13483	0.13483	0.13483	0.9921	0.633	0.9553	0.0079	0.0198	0.1307	0.367	0.9802	0.9545	0.0447	0.8693	0.0455	0.21	0.19	TRUE	7.38951
7nc470_220_1831	NCU06118.2	1.16205	1	1.31779	1.15102	0.35096	0.27223	0.38716	0.29713	0.41172	0.31153	0.42171	0.36183	0.21239	0.21239	0.21239	0.21239	0.1005	0.1005	0.1005	0.1005	0.30602	0.30602	0.30602	0.30602	0.7894	0.2849	0.5135	0.2106	0.1254	0.2197	0.7151	0.8746	0.7572	0.4865	0.7803	0.2428	0.4	0.37	TRUE	1.38868
7nc470_270_2401	NCU06123.2	1.25973	1	1.18267	1.00391	0.25455	0.22639	0.24804	0.22283	0.28811	0.23764	0.29417	0.27398	0.17358	0.17358	0.17358	0.17358	0.07568	0.07568	0.07568	0.07568	0.23114	0.23114	0.23114	0.23114	0.9226	0.6615	0.8844	0.0774	0.1652	0.4887	0.3385	0.8348	0.846	0.1156	0.5113	0.154	0.34	0.3	TRUE	4.08888
7nc470_370_858	NCU06133.2	1.34737	1	1.21683	1.22749	0.35955	0.27334	0.32684	0.34354	0.41652	0.35022	0.38554	0.38856	0.22528	0.22528	0.22528	0.22528	0.09528	0.09528	0.09528	0.09528	0.27284	0.27284	0.27284	0.27284	0.9123	0.6939	0.6574	0.0877	0.1979	0.1456	0.3061	0.8021	0.4862	0.3426	0.8544	0.5138	0.4	0.37	TRUE	2.04488
7nc470_380_552	NCU06134.2	1.04148	1	1.0523	1.07024	0.27892	0.26743	0.4663	0.37686	0.31618	0.27384	0.52401	0.42656	0.13032	0.13032	0.13032	0.13032	0.08234	0.08234	0.08234	0.08234	0.45377	0.45377	0.45377	0.45377	0.64	0.4763	0.4373	0.36	0.3977	0.2897	0.5237	0.6023	0.4687	0.5627	0.7103	0.5313	0.35	0.31	TRUE	6.4826
7nc470_400_618	NCU06136.2	1.07547	1	1.08841	1.00537	0.13374	0.12642	0.13348	0.13127	0.14804	0.13566	0.14604	0.14323	0.0961	0.0961	0.0961	0.0961	0.04273	0.04273	0.04273	0.04273	0.13921	0.13921	0.13921	0.13921	0.8077	0.4378	0.7577	0.1923	0.1952	0.4745	0.5622	0.8048	0.825	0.2423	0.5255	0.175	0.21	0.18	TRUE	8.28852
7nc470_430_68	NCU06139.2	1.18843	1	1.36931	1.06479	0.29431	0.24085	0.321	0.26046	0.32935	0.30303	0.34279	0.312	0.19931	0.19931	0.19931	0.19931	0.08641	0.08641	0.08641	0.08641	0.24231	0.24231	0.24231	0.24231	0.8294	0.2073	0.7108	0.1706	0.0752	0.3605	0.7927	0.9248	0.9172	0.2892	0.6395	0.0828	0.37	0.33	TRUE	2.33463
7nc470_560_1360	NCU06153.2	3.61853	1	3.45585	1.03982	1.70308	0.60128	1.23952	0.4437	1.29406	1.94143	1.02212	0.92954	0.27474	0.27474	0.27474	0.27474	0.15977	0.15977	0.15977	0.15977	0.64523	0.64523	0.64523	0.64523	0.9533	0.5739	0.9839	0.0467	0.0364	0.437	0.4261	0.9636	0.9931	0.0161	0.563	0.0069	0.45	0.16	TRUE	1.79804
7nc470_650_51	NCU06162.2b	1.56215	1	1.33329	1.06268	0.50319	0.34515	0.5705	0.47127	0.47314	0.43213	0.66621	0.70979	0.23094	0.23094	0.23094	0.23094	0.11843	0.11843	0.11843	0.11843	0.42026	0.42026	0.42026	0.42026	0.9448	0.7639	0.8658	0.0552	0.1938	0.3968	0.2361	0.8062	0.7264	0.1342	0.6032	0.2736	0.45	0.42	TRUE	1.88784
7nc470_660_573	NCU11161.2a	1.36632	1	1.39757	1.16873	0.48589	0.38493	0.64663	0.65782	0.51134	0.51314	0.75175	0.93823	0.24787	0.24787	0.24787	0.24787	0.14167	0.14167	0.14167	0.14167	0.60541	0.60541	0.60541	0.60541	0.8845	0.463	0.6604	0.1155	0.1738	0.3178	0.537	0.8262	0.6622	0.3396	0.6822	0.3378	0.5	0.47	TRUE	2.36722
7nc470_690_134	NCU06165.2b	1.54441	1	1.09519	1.12655	0.49744	0.34552	0.39384	0.41298	0.5216	0.46621	0.47507	0.51191	0.27295	0.27295	0.27295	0.27295	0.12324	0.12324	0.12324	0.12324	0.39146	0.39146	0.39146	0.39146	0.9236	0.9188	0.8447	0.0764	0.3811	0.3051	0.0812	0.6189	0.458	0.1553	0.6949	0.542	0.47	0.44	TRUE	0.293794
7nc470_730_874	NCU06169.2	1.22671	1	1.20387	1.122	0.15143	0.12953	0.17207	0.17103	0.16086	0.14932	0.17784	0.17928	0.08307	0.08307	0.08307	0.08307	0.04114	0.04114	0.04114	0.04114	0.17353	0.17353	0.17353	0.17353	0.9728	0.6042	0.8305	0.0272	0.0552	0.0923	0.3958	0.9448	0.7738	0.1695	0.9077	0.2262	0.2	0.18	TRUE	9.21717
7nc495_110_790	NCU02461.2	1.1167	1	1.28885	1.0401	0.19728	0.18292	0.21951	0.1883	0.22368	0.20395	0.22478	0.21249	0.1348	0.1348	0.1348	0.1348	0.06112	0.06112	0.06112	0.06112	0.19754	0.19754	0.19754	0.19754	0.8291	0.1258	0.7082	0.1709	0.0546	0.3649	0.8742	0.9454	0.9435	0.2918	0.6351	0.0565	0.27	0.24	TRUE	5.50143
7nc510_090_2580	NCU02422.2	1.13642	1	1.16867	1.05561	0.10365	0.09303	0.10584	0.1005	0.11324	0.10151	0.11096	0.10134	0.06747	0.06747	0.06747	0.06747	0.03084	0.03084	0.03084	0.03084	0.10691	0.10691	0.10691	0.10691	0.9602	0.3158	0.8488	0.0398	0.0335	0.1878	0.6842	0.9665	0.9326	0.1512	0.8122	0.0674	0.42	0.35	TRUE	11.2602
7nc515_010_4186	7nc515_010	1.00816	1	1.07017	1.02449	0.24555	0.23439	0.26228	0.24296	0.25742	0.27179	0.28631	0.29381	0.19082	0.19082	0.19082	0.19082	0.08256	0.08256	0.08256	0.08256	0.2562	0.2562	0.2562	0.2562	0.5215	0.3492	0.4632	0.4785	0.3648	0.4376	0.6508	0.6352	0.6016	0.5368	0.5624	0.3984	0.36	0.32	TRUE	3.36488
7nc515_020_1238	NCU02383.2	1.18973	1	1.11605	1.04568	0.34572	0.29363	0.37179	0.3224	0.36308	0.3315	0.43042	0.46182	0.22504	0.22504	0.22504	0.22504	0.10521	0.10521	0.10521	0.10521	0.32158	0.32158	0.32158	0.32158	0.7979	0.6399	0.695	0.2021	0.3295	0.401	0.3601	0.6705	0.6115	0.305	0.599	0.3885	0.42	0.39	TRUE	1.14212
7nc515_040_839	NCU02386.2	1.03043	1	1.09992	1.05912	0.17261	0.16108	0.29159	0.2491	0.18245	0.14444	0.29844	0.23346	0.0563	0.0563	0.0563	0.0563	0.03743	0.03743	0.03743	0.03743	0.30812	0.30812	0.30812	0.30812	0.709	0.2224	0.3495	0.291	0.1925	0.1846	0.7776	0.8075	0.6475	0.6505	0.8154	0.3525	0.2	0.18	TRUE	10.7935
7nc515_170_917	NCU02400.2	1.93684	1	1.57365	1.0373	0.28591	0.18204	0.24024	0.18609	0.28813	0.21217	0.27289	0.22894	0.12985	0.12985	0.12985	0.12985	0.05619	0.05619	0.05619	0.05619	0.1785	0.1785	0.1785	0.1785	0.9992	0.9489	0.9978	0.0008	0.0065	0.3783	0.0511	0.9935	0.9937	0.0022	0.6217	0.0063	0.25	0.24	TRUE	5.52784
7nc520_070_3411	NCU02356.2	1.13978	1	1.1392	1.12847	0.29698	0.26268	0.41054	0.39189	0.29633	0.28203	0.44458	0.49348	0.16588	0.16588	0.16588	0.16588	0.08769	0.08769	0.08769	0.08769	0.34603	0.34603	0.34603	0.34603	0.782	0.5083	0.5239	0.218	0.2843	0.2299	0.4917	0.7157	0.5125	0.4761	0.7701	0.4875	0.37	0.34	TRUE	4.37153
7nc527_080_1219	NCU02318.2	1.31258	1	1.07437	1.28799	0.36709	0.28087	0.29642	0.35345	0.39354	0.34915	0.34901	0.41494	0.23014	0.23014	0.23014	0.23014	0.09932	0.09932	0.09932	0.09932	0.28294	0.28294	0.28294	0.28294	0.8968	0.8388	0.532	0.1032	0.3834	0.1269	0.1612	0.6166	0.1867	0.468	0.8731	0.8133	0.41	0.37	TRUE	0.442356
7nc530_030_258	NCU02219.2	1.1573	1	2.39457	1.27779	0.3641	0.34509	0.64608	0.40694	0.5077	0.47955	0.61296	0.51082	0.26979	0.26979	0.26979	0.26979	0.11386	0.11386	0.11386	0.11386	0.31272	0.31272	0.31272	0.31272	0.7435	0.013	0.3599	0.2565	0.0076	0.1536	0.987	0.9924	0.9878	0.6401	0.8464	0.0122	0.42	0.42	TRUE	-0.477389
7nc530_040_543	NCU02220.2	1.77815	1	1.4726	1.08001	0.17952	0.12753	0.16671	0.13628	0.19021	0.13741	0.16194	0.14118	0.08537	0.08537	0.08537	0.08537	0.03806	0.03806	0.03806	0.03806	0.12517	0.12517	0.12517	0.12517	0.9996	0.9801	0.9993	0.0004	0.0037	0.1661	0.0199	0.9963	0.9963	0.0007	0.8339	0.0037	0.18	0.16	TRUE	9.31865
7nc530_090_4849	NCU02225.2	1.11464	1	1.21858	1.09111	0.20564	0.17838	0.2139	0.19703	0.22154	0.20368	0.22614	0.213	0.14044	0.14044	0.14044	0.14044	0.06233	0.06233	0.06233	0.06233	0.18413	0.18413	0.18413	0.18413	0.8075	0.2294	0.5567	0.1925	0.095	0.2424	0.7706	0.905	0.8127	0.4433	0.7576	0.1873	0.28	0.25	TRUE	5.74689
7nc530_120_659	NCU02228.2	1.07612	1	1.00205	1.00576	0.24895	0.23419	0.2421	0.24226	0.28338	0.25783	0.28388	0.27562	0.19308	0.19308	0.19308	0.19308	0.08362	0.08362	0.08362	0.08362	0.24325	0.24325	0.24325	0.24325	0.6758	0.6614	0.6393	0.3242	0.4914	0.4823	0.3386	0.5086	0.4942	0.3607	0.5177	0.5058	0.37	0.33	TRUE	3.37697
7nc530_170_2098	NCU02233.2	1.10905	1	1.11883	1.12974	0.30887	0.28105	0.31245	0.32506	0.36182	0.3534	0.36879	0.39161	0.23911	0.23911	0.23911	0.23911	0.10333	0.10333	0.10333	0.10333	0.29287	0.29287	0.29287	0.29287	0.702	0.4908	0.473	0.298	0.3158	0.2868	0.5092	0.6842	0.4837	0.527	0.7132	0.5163	0.42	0.38	TRUE	1.81145
7nc530_180_4832	NCU02234.2	1.5431	1	1.32509	1.07915	0.36285	0.24941	0.31849	0.26492	0.36322	0.30344	0.35716	0.35225	0.19876	0.19876	0.19876	0.19876	0.08445	0.08445	0.08445	0.08445	0.25894	0.25894	0.25894	0.25894	0.98	0.8078	0.9393	0.02	0.0948	0.3242	0.1922	0.9052	0.8578	0.0607	0.6758	0.1422	0.37	0.33	TRUE	2.60946
7nc536_130_324	7nc536_130	1.25018	1	1.32231	1.03038	0.22452	0.1879	0.26088	0.21608	0.23123	0.21245	0.2846	0.25311	0.13207	0.13207	0.13207	0.13207	0.06317	0.06317	0.06317	0.06317	0.22452	0.22452	0.22452	0.22452	0.9442	0.3116	0.893	0.0558	0.0523	0.393	0.6884	0.9477	0.9328	0.107	0.607	0.0672	0.29	0.26	TRUE	6.03317
7nc600_060_3350	NCU05754.2	1.77551	1	2.99901	1.12051	0.83916	0.53918	1.61392	0.66075	0.84982	1.05558	1.25487	1.39653	0.29904	0.29904	0.29904	0.29904	0.17268	0.17268	0.17268	0.17268	0.68367	0.68367	0.68367	0.68367	0.892	0.0727	0.8149	0.108	0.0481	0.3383	0.9273	0.9519	0.9218	0.1851	0.6617	0.0782	0.48	0.22	TRUE	2.06519
7nc600_090_730	NCU05757.2	1.06963	1	1.09508	1.06867	0.12881	0.12273	0.1325	0.12494	0.13527	0.13358	0.13402	0.13231	0.08877	0.08877	0.08877	0.08877	0.03936	0.03936	0.03936	0.03936	0.13383	0.13383	0.13383	0.13383	0.7954	0.3755	0.4939	0.2046	0.1676	0.1966	0.6245	0.8324	0.624	0.5061	0.8034	0.376	0.19	0.17	TRUE	8.9054
7nc600_130_188	NCU05761.2	1.10351	1	1.1451	1.01065	0.18232	0.17438	0.18614	0.1692	0.19038	0.18318	0.21374	0.18547	0.12816	0.12816	0.12816	0.12816	0.05696	0.05696	0.05696	0.05696	0.18012	0.18012	0.18012	0.18012	0.8064	0.3642	0.7454	0.1936	0.1557	0.4637	0.6358	0.8443	0.8469	0.2546	0.5363	0.1531	0.26	0.24	TRUE	6.33425
7nc600_140_1112	NCU05762.2	1.07697	1	1.12434	1.00162	0.18632	0.177	0.20564	0.1886	0.20897	0.20918	0.22299	0.20048	0.14108	0.14108	0.14108	0.14108	0.0621	0.0621	0.0621	0.0621	0.19379	0.19379	0.19379	0.19379	0.7271	0.3621	0.6984	0.2729	0.2168	0.5031	0.6379	0.7832	0.8124	0.3016	0.4969	0.1876	0.29	0.25	TRUE	5.38763
7nc600_190_2126	NCU05765.2b	1.08344	1	1.09737	1.01874	0.12289	0.11785	0.12651	0.12023	0.13434	0.12859	0.13386	0.12343	0.08643	0.08643	0.08643	0.08643	0.03815	0.03815	0.03815	0.03815	0.13157	0.13157	0.13157	0.13157	0.8467	0.4286	0.7571	0.1533	0.1525	0.3944	0.5714	0.8475	0.8264	0.2429	0.6056	0.1736	0.19	0.17	TRUE	9.15744
7nc605_030_1765	NCU05775.2	1.0534	1	1.06614	1.0173	0.17403	0.17226	0.17914	0.16405	0.18488	0.18364	0.19463	0.18891	0.12724	0.12724	0.12724	0.12724	0.05691	0.05691	0.05691	0.05691	0.18159	0.18159	0.18159	0.18159	0.6788	0.4576	0.5998	0.3212	0.3013	0.4332	0.5424	0.6987	0.6593	0.4002	0.5668	0.3407	0.27	0.23	TRUE	6.46295
7nc605_220_471	NCU05795.2	1.26931	1	1.21917	1.0666	0.29882	0.24251	0.26457	0.24134	0.31023	0.28501	0.29642	0.28685	0.18128	0.18128	0.18128	0.18128	0.07824	0.07824	0.07824	0.07824	0.24164	0.24164	0.24164	0.24164	0.9039	0.6005	0.8197	0.0961	0.1512	0.3385	0.3995	0.8488	0.7985	0.1803	0.6615	0.2015	0.35	0.31	TRUE	3.65114
7nc605_340_1453	NCU05808.2	1.06904	1	1.17548	1.03824	0.16815	0.16678	0.17632	0.16701	0.18582	0.1691	0.19072	0.17624	0.12188	0.12188	0.12188	0.12188	0.05319	0.05319	0.05319	0.05319	0.1697	0.1697	0.1697	0.1697	0.7472	0.1926	0.6044	0.2528	0.1076	0.361	0.8074	0.8924	0.8709	0.3956	0.639	0.1291	0.25	0.22	TRUE	6.58801
7nc605_350_1262	NCU05809.2	1.06118	1	1.09199	1.02895	0.25803	0.25708	0.25799	0.25893	0.29544	0.2857	0.30557	0.29765	0.20292	0.20292	0.20292	0.20292	0.08847	0.08847	0.08847	0.08847	0.25904	0.25904	0.25904	0.25904	0.632	0.4257	0.5558	0.368	0.3338	0.4392	0.5743	0.6662	0.6288	0.4442	0.5608	0.3712	0.38	0.34	TRUE	2.94471
7nc605_460_1045	NCU05821.2	1.2302	1	1.31887	1.19934	0.21043	0.17406	0.20546	0.1998	0.21527	0.20207	0.22422	0.21788	0.12667	0.12667	0.12667	0.12667	0.05629	0.05629	0.05629	0.05629	0.17319	0.17319	0.17319	0.17319	0.9444	0.2606	0.578	0.0556	0.0351	0.0684	0.7394	0.9649	0.7988	0.422	0.9316	0.2012	0.26	0.23	TRUE	6.34831
7nc605_470_761	NCU05822.2	1.0531	1	1.22224	1.14387	0.17838	0.17588	0.20151	0.19227	0.19797	0.2013	0.21737	0.20019	0.12929	0.12929	0.12929	0.12929	0.05676	0.05676	0.05676	0.05676	0.18482	0.18482	0.18482	0.18482	0.6752	0.1077	0.2638	0.3248	0.0863	0.1369	0.8923	0.9137	0.7215	0.7362	0.8631	0.2785	0.27	0.24	TRUE	6.36947
7nc605_500_675	NCU05825.2	1.11041	1	1.16523	1.03928	0.11595	0.10927	0.11885	0.11084	0.1271	0.11523	0.11804	0.11635	0.07874	0.07874	0.07874	0.07874	0.03594	0.03594	0.03594	0.03594	0.11684	0.11684	0.11684	0.11684	0.9135	0.231	0.7937	0.0865	0.0473	0.2893	0.769	0.9527	0.9331	0.2063	0.7107	0.0669	0.18	0.15	TRUE	9.97827
7nc605_570_736	NCU05831.2	1.18545	1	1.16387	1.02021	0.1745	0.15916	0.2518	0.21647	0.15869	0.1643	0.25507	0.25127	0.0796	0.0796	0.0796	0.0796	0.04474	0.04474	0.04474	0.04474	0.23838	0.23838	0.23838	0.23838	0.9449	0.5982	0.8828	0.0551	0.1209	0.4056	0.4018	0.8791	0.8222	0.1172	0.5944	0.1778	0.22	0.19	TRUE	9.09467
7nc610_050_443	NCU05852.2	2.05608	1	1.53564	1.07861	0.33095	0.20661	0.27239	0.22889	0.31403	0.24835	0.27934	0.27616	0.127	0.127	0.127	0.127	0.06194	0.06194	0.06194	0.06194	0.22518	0.22518	0.22518	0.22518	0.9991	0.9733	0.9969	0.0009	0.0154	0.2952	0.0267	0.9846	0.9842	0.0031	0.7048	0.0158	0.27	0.25	TRUE	5.38648
7nc610_090_2795	NCU05856.2	1.56854	1	1.14247	1.10225	0.47658	0.32332	0.36908	0.34767	0.46973	0.42583	0.40939	0.44163	0.19581	0.19581	0.19581	0.19581	0.10568	0.10568	0.10568	0.10568	0.3973	0.3973	0.3973	0.3973	0.9457	0.9298	0.9037	0.0543	0.2888	0.2873	0.0702	0.7112	0.5651	0.0963	0.7127	0.4349	0.4	0.38	TRUE	3.99314
7nc610_240_1628	NCU05873.2	1.11859	1	1.19154	1.03947	0.11968	0.11791	0.13122	0.1193	0.12778	0.1291	0.13568	0.12895	0.0859	0.0859	0.0859	0.0859	0.03743	0.03743	0.03743	0.03743	0.12489	0.12489	0.12489	0.12489	0.9177	0.1968	0.8034	0.0823	0.042	0.3001	0.8032	0.958	0.9415	0.1966	0.6999	0.0585	0.19	0.17	TRUE	9.02279
7nc610_250_850	NCU05874.2a	1.12989	1	1.23964	1.04557	0.06127	0.05605	0.06376	0.05618	0.06108	0.05663	0.06674	0.05723	0.03842	0.03842	0.03842	0.03842	0.01745	0.01745	0.01745	0.01745	0.05992	0.05992	0.05992	0.05992	0.9925	0.0185	0.954	0.0075	0.0014	0.1025	0.9815	0.9986	0.9978	0.046	0.8975	0.0022	0.37	0.26	TRUE	15.4588
7nc610_310_56	NCU05877.2	1.37312	1	1.30409	1.33167	0.42545	0.31071	0.38613	0.41437	0.46986	0.39896	0.44814	0.43385	0.19682	0.19682	0.19682	0.19682	0.10276	0.10276	0.10276	0.10276	0.36186	0.36186	0.36186	0.36186	0.9312	0.5931	0.5533	0.0688	0.1509	0.1243	0.4069	0.8491	0.4568	0.4467	0.8757	0.5432	0.41	0.38	TRUE	3.81861
7nc610_500_1202	NCU05897.2	3.8708	1	4.46145	12.3467	1.20694	0.30729	1.22894	2.46215	1.76811	0.54654	1.56667	2.03887	0.22863	0.22863	0.22863	0.22863	0.09688	0.09688	0.09688	0.09688	0.29049	0.29049	0.29049	0.29049	1	0.2383	0.0005	0	0.0003	0	0.7617	0.9997	0.0004	0.9995	1	0.9996	0.27	0.37	TRUE	-0.205936
7nc612_050_466	NCU05903.2	1.10062	1	1.20987	1.03156	0.16504	0.17761	0.20221	0.21228	0.16758	0.18234	0.20652	0.23227	0.08606	0.08606	0.08606	0.08606	0.04786	0.04786	0.04786	0.04786	0.2566	0.2566	0.2566	0.2566	0.8668	0.1298	0.7323	0.1332	0.0672	0.367	0.8702	0.9328	0.9086	0.2677	0.633	0.0914	0.23	0.21	TRUE	8.72365
7nc650_050_1278	NCU08127.2	1.70917	1	1.2014	1.42027	0.3359	0.23201	0.25265	0.3509	0.31437	0.25459	0.2857	0.40566	0.1268	0.1268	0.1268	0.1268	0.06957	0.06957	0.06957	0.06957	0.29549	0.29549	0.29549	0.29549	0.995	0.9816	0.8672	0.005	0.1226	0.0376	0.0184	0.8774	0.1447	0.1328	0.9624	0.8553	0.3	0.28	TRUE	5.45249
7nc650_110_333	NCU08133.2	1.00876	1	1.43959	1.41966	0.16879	0.16991	0.20781	0.20972	0.18795	0.18711	0.22003	0.22267	0.11951	0.11951	0.11951	0.11951	0.05311	0.05311	0.05311	0.05311	0.17775	0.17775	0.17775	0.17775	0.5356	0.008	0.016	0.4644	0.0111	0.0095	0.992	0.9889	0.5594	0.984	0.9905	0.4406	0.24	0.22	TRUE	6.59727
7nc650_120_1920	NCU08134.2	1.02315	1	1.06494	1.05635	0.17942	0.18749	0.2011	0.19303	0.19913	0.20155	0.21162	0.21747	0.13828	0.13828	0.13828	0.13828	0.06148	0.06148	0.06148	0.06148	0.20298	0.20298	0.20298	0.20298	0.5781	0.3656	0.4049	0.4219	0.3272	0.3231	0.6344	0.6728	0.5236	0.5951	0.6769	0.4764	0.28	0.25	TRUE	5.45479
7nc651_020_550	NCU08138.2	1.11722	1	1.00035	1.02681	0.18617	0.16429	0.1681	0.17283	0.20822	0.17853	0.18672	0.18566	0.12809	0.12809	0.12809	0.12809	0.05676	0.05676	0.05676	0.05676	0.17802	0.17802	0.17802	0.17802	0.8365	0.8261	0.7413	0.1635	0.4891	0.4048	0.1739	0.5109	0.4045	0.2587	0.5952	0.5955	0.27	0.23	TRUE	6.35673
7nc651_030_1123	NCU08139.2a	1.45323	1	1.6892	1.19693	0.50924	0.40329	0.65545	0.54567	0.57669	0.58338	0.66506	0.79929	0.2858	0.2858	0.2858	0.2858	0.14424	0.14424	0.14424	0.14424	0.46827	0.46827	0.46827	0.46827	0.9113	0.2809	0.7059	0.0887	0.0851	0.2884	0.7191	0.9149	0.8331	0.2941	0.7116	0.1669	0.28	0.48	TRUE	1.73675
7nc652_100_96	NCU08150.2	1.32905	1	1.24308	1.14547	0.74123	0.60001	0.64534	0.68121	0.88618	1.02785	0.95441	0.99243	0.46054	0.46054	0.46054	0.46054	0.23185	0.23185	0.23185	0.23185	0.82292	0.82292	0.82292	0.82292	0.7157	0.5501	0.6044	0.2843	0.3482	0.4145	0.4499	0.6518	0.5546	0.3956	0.5855	0.4454	0.32	0.19	TRUE	-1.31228
7nc653_080_177	7nc653_080	1.07198	1	1.11751	1.27726	0.28012	0.25337	0.39677	0.41765	0.28664	0.28822	0.45087	0.49106	0.15337	0.15337	0.15337	0.15337	0.08135	0.08135	0.08135	0.08135	0.33792	0.33792	0.33792	0.33792	0.681	0.3901	0.2111	0.319	0.3055	0.085	0.6099	0.6945	0.3025	0.7889	0.915	0.6975	0.35	0.32	TRUE	4.96846
7nc653_150_2506	NCU08168.2c	1.20499	1	1.41638	1.01318	0.24889	0.22525	0.2837	0.22224	0.28405	0.26945	0.29464	0.25737	0.16967	0.16967	0.16967	0.16967	0.07461	0.07461	0.07461	0.07461	0.21872	0.21872	0.21872	0.21872	0.881	0.1466	0.8378	0.119	0.0403	0.4563	0.8534	0.9597	0.9703	0.1622	0.5437	0.0297	0.33	0.29	TRUE	4.40967
7nc653_200_645	NCU11090.2a	1.39265	1	1.62526	1.68286	0.45311	0.34849	0.54833	0.61806	0.54328	0.47255	0.66912	0.64485	0.26886	0.26886	0.26886	0.26886	0.12234	0.12234	0.12234	0.12234	0.37412	0.37412	0.37412	0.37412	0.8922	0.2461	0.259	0.1078	0.0678	0.0386	0.7539	0.9322	0.4431	0.741	0.9614	0.5569	0.46	0.44	TRUE	0.945476
7nc653_210_1100	NCU10080.2	1.33945	1	1.17473	1.03484	0.24494	0.20352	0.2252	0.21181	0.27042	0.2228	0.24732	0.24107	0.15459	0.15459	0.15459	0.15459	0.06747	0.06747	0.06747	0.06747	0.20368	0.20368	0.20368	0.20368	0.9695	0.8382	0.9298	0.0305	0.1539	0.3987	0.1618	0.8461	0.8209	0.0702	0.6013	0.1791	0.3	0.27	TRUE	3.50746
7nc654_080_1443	NCU08180.2	1.39568	1	1.20485	1.06076	0.27111	0.21671	0.24639	0.22746	0.28832	0.2496	0.27776	0.2643	0.16647	0.16647	0.16647	0.16647	0.07397	0.07397	0.07397	0.07397	0.20788	0.20788	0.20788	0.20788	0.9731	0.8417	0.9326	0.0269	0.1445	0.3324	0.1583	0.8555	0.8028	0.0674	0.6676	0.1972	0.32	0.29	TRUE	2.44681
7nc654_090_1068	NCU08181.2a	1.12674	1	1.23459	1.0487	0.0747	0.0688	0.07768	0.07475	0.07843	0.07172	0.07817	0.07554	0.04857	0.04857	0.04857	0.04857	0.02149	0.02149	0.02149	0.02149	0.07573	0.07573	0.07573	0.07573	0.9834	0.0387	0.9089	0.0166	0.0042	0.1435	0.9613	0.9958	0.9937	0.0911	0.8565	0.0063	0.32	0.23	TRUE	13.7481
7nc654_100_1632	NCU08181.2b	1.51988	1	1.21379	1.12236	0.24491	0.18187	0.20072	0.18834	0.2366	0.19809	0.22908	0.21966	0.12697	0.12697	0.12697	0.12697	0.05651	0.05651	0.05651	0.05651	0.18746	0.18746	0.18746	0.18746	0.9938	0.9544	0.9681	0.0062	0.0891	0.1573	0.0456	0.9109	0.7621	0.0319	0.8427	0.2379	0.26	0.24	TRUE	5.14997
7nc654_170_480	NCU08187.2	1.25288	1	1.18615	1.02221	0.14793	0.13493	0.13623	0.14432	0.15462	0.14649	0.13884	0.16194	0.08161	0.08161	0.08161	0.08161	0.03981	0.03981	0.03981	0.03981	0.16215	0.16215	0.16215	0.16215	0.9838	0.7776	0.9599	0.0162	0.055	0.3937	0.2224	0.945	0.9504	0.0401	0.6063	0.0496	0.2	0.17	TRUE	8.94059
80a10_040_2043	NCU04566.2	1.42537	1	1.19985	1.16729	0.44109	0.32771	0.44515	0.45484	0.40817	0.3539	0.47441	0.54316	0.12167	0.12167	0.12167	0.12167	0.07896	0.07896	0.07896	0.07896	0.43492	0.43492	0.43492	0.43492	0.9316	0.8902	0.8186	0.0684	0.2035	0.1332	0.1098	0.7965	0.5566	0.1814	0.8668	0.4434	0.32	0.3	TRUE	6.87628
80a10_070_2904	NCU04570.2	1.01372	1	1.01598	1.21033	0.23346	0.23525	0.26473	0.30285	0.27396	0.24697	0.31374	0.33851	0.17515	0.17515	0.17515	0.17515	0.08326	0.08326	0.08326	0.08326	0.27813	0.27813	0.27813	0.27813	0.5314	0.5017	0.1831	0.4686	0.467	0.1236	0.4983	0.533	0.1912	0.8169	0.8764	0.8088	0.36	0.32	TRUE	3.36244
80a10_130_1495	NCU04575.2	1.10398	1	1.11825	1.03804	0.13765	0.12836	0.14439	0.1325	0.14489	0.14098	0.14512	0.14246	0.09244	0.09244	0.09244	0.09244	0.04176	0.04176	0.04176	0.04176	0.14511	0.14511	0.14511	0.14511	0.8699	0.4322	0.74	0.1301	0.1373	0.3147	0.5678	0.8627	0.8072	0.26	0.6853	0.1928	0.2	0.18	TRUE	8.8611
80a10_280_669	NCU04590.2	1.27672	1	1.2105	1.12336	0.27057	0.21	0.24204	0.24077	0.28625	0.26113	0.27123	0.26807	0.16973	0.16973	0.16973	0.16973	0.07387	0.07387	0.07387	0.07387	0.21547	0.21547	0.21547	0.21547	0.9294	0.6444	0.7699	0.0706	0.1417	0.2164	0.3556	0.8583	0.7028	0.2301	0.7836	0.2972	0.33	0.29	TRUE	4.26367
80a10_290_1647	NCU04591.2	1.07492	1	1.13079	1.11574	0.18486	0.18265	0.19433	0.20179	0.20784	0.19599	0.20771	0.22086	0.13844	0.13844	0.13844	0.13844	0.06156	0.06156	0.06156	0.06156	0.19102	0.19102	0.19102	0.19102	0.7276	0.3326	0.3904	0.2724	0.1938	0.1889	0.6674	0.8062	0.542	0.6096	0.8111	0.458	0.28	0.25	TRUE	5.80793
80a10_360_1134	NCU04597.2	1.32443	1	1.21498	1.09796	0.23486	0.18247	0.21257	0.20561	0.23306	0.21599	0.2334	0.23438	0.14254	0.14254	0.14254	0.14254	0.06301	0.06301	0.06301	0.06301	0.19804	0.19804	0.19804	0.19804	0.9682	0.7603	0.8832	0.0318	0.1053	0.2301	0.2397	0.8947	0.7792	0.1168	0.7699	0.2208	0.29	0.26	TRUE	5.6089
8d4_080_1252	NCU01231.2	35.6009	1	13.8328	2.83928	12.4125	0.54546	5.81904	1.65325	6.61272	1.38183	10.9756	4.88938	0.43787	0.43787	0.43787	0.43787	0.19056	0.19056	0.19056	0.19056	0.55288	0.55288	0.55288	0.55288	1	0.9688	0.9998	0	0	0.0479	0.0312	1	0.9932	0.0002	0.9521	0.0068	0.29	0.41	TRUE	-3.37939
90c4_130_418	NCU00778.2	1.61799	1	1.1285	1.05063	0.68201	0.43268	0.57259	0.49304	0.7887	0.56254	0.81051	0.667	0.36127	0.36127	0.36127	0.36127	0.17142	0.17142	0.17142	0.17142	0.53717	0.53717	0.53717	0.53717	0.9094	0.8169	0.8508	0.0906	0.3965	0.4542	0.1831	0.6035	0.5603	0.1492	0.5458	0.4397	0.35	0.48	TRUE	-1.98235
90c4_180_427	NCU00773.2	1.07537	1	1.18691	1.02524	0.17774	0.16278	0.17403	0.16177	0.17951	0.17557	0.19264	0.17922	0.12363	0.12363	0.12363	0.12363	0.05543	0.05543	0.05543	0.05543	0.16694	0.16694	0.16694	0.16694	0.7419	0.1798	0.6522	0.2581	0.095	0.3952	0.8202	0.905	0.8975	0.3478	0.6048	0.1025	0.25	0.23	TRUE	6.69489
90c4_260_1345	NCU00765.2	1.32969	1	1.24593	1.19201	0.15784	0.14197	0.16555	0.20034	0.16983	0.15262	0.1662	0.20858	0.0677	0.0677	0.0677	0.0677	0.03725	0.03725	0.03725	0.03725	0.21101	0.21101	0.21101	0.21101	0.9894	0.8352	0.8808	0.0106	0.032	0.0556	0.1648	0.968	0.7179	0.1192	0.9444	0.2821	0.19	0.17	TRUE	9.8532
90c4_290_308	NCU00762.2	17.2682	1	40.2504	1.1804	4.19092	0.31588	6.08936	0.34729	5.80172	0.5676	4.20494	0.60024	0.20241	0.20241	0.20241	0.20241	0.08936	0.08936	0.08936	0.08936	0.27768	0.27768	0.27768	0.27768	1	0.0066	1	0	0	0.1823	0.9934	1	1	0	0.8177	0	0.25	0.34	TRUE	1.90301
93g11_020_801	NCU03769.2	2.85036	1	1.38555	1.29288	1.00139	0.49265	0.54347	0.75343	0.7834	0.74068	0.64231	1.28618	0.24533	0.24533	0.24533	0.24533	0.14339	0.14339	0.14339	0.14339	0.5769	0.5769	0.5769	0.5769	0.9961	0.9826	0.94	0.0039	0.1721	0.2845	0.0174	0.8279	0.5969	0.06	0.7155	0.4031	0.47	0.47	TRUE	1.58883
93g11_030_1020	NCU03768.2	1.18725	1	1.23685	1.29252	0.37466	0.32333	0.3858	0.40107	0.4597	0.42625	0.42653	0.4552	0.27322	0.27322	0.27322	0.27322	0.11436	0.11436	0.11436	0.11436	0.31228	0.31228	0.31228	0.31228	0.7635	0.4246	0.3804	0.2365	0.2317	0.1603	0.5754	0.7683	0.4175	0.6196	0.8397	0.5825	0.46	0.42	TRUE	-2.1161
93g11_160_1160	NCU03756.2	1.43308	1	1.28936	1.06468	0.09943	0.07621	0.09172	0.08015	0.09476	0.07941	0.08852	0.0859	0.0522	0.0522	0.0522	0.0522	0.0238	0.0238	0.0238	0.0238	0.08685	0.08685	0.08685	0.08685	0.9994	0.9701	0.9986	0.0006	0.0034	0.1032	0.0299	0.9966	0.9942	0.0014	0.8968	0.0058	0.33	0.32	TRUE	13.1734
93g11_180_5231	NCU03754.2	1.03777	1	1.12383	1.0897	0.14615	0.13671	0.1502	0.15189	0.15674	0.15219	0.16135	0.15993	0.10446	0.10446	0.10446	0.10446	0.046	0.046	0.046	0.046	0.16131	0.16131	0.16131	0.16131	0.6648	0.1999	0.3191	0.3352	0.1518	0.1854	0.8001	0.8482	0.6267	0.6809	0.8146	0.3733	0.22	0.2	TRUE	7.75978
93g11_210_423	NCU03752.2	1.01358	1	1.11864	1.03637	0.17904	0.18643	0.19428	0.17923	0.19008	0.18504	0.21187	0.19555	0.13623	0.13623	0.13623	0.13623	0.0599	0.0599	0.0599	0.0599	0.18427	0.18427	0.18427	0.18427	0.5371	0.2034	0.4335	0.4629	0.2149	0.3794	0.7966	0.7851	0.7319	0.5665	0.6206	0.2681	0.28	0.25	TRUE	5.91013
93g11_230_1703	NCU03751.2	1.22356	1	1.18757	1.0199	0.47287	0.35226	0.45649	0.35849	0.53782	0.41706	0.49631	0.42987	0.20361	0.20361	0.20361	0.20361	0.12259	0.12259	0.12259	0.12259	0.52723	0.52723	0.52723	0.52723	0.7948	0.563	0.7551	0.2052	0.2483	0.4551	0.437	0.7517	0.7435	0.2449	0.5449	0.2565	0.44	0.42	TRUE	3.90586
94c8_010_4568	NCU04105.2	2.10621	1	4.09452	1.11927	0.36127	0.19225	0.88119	0.32421	0.32617	0.31094	0.48098	0.67792	0.0594	0.0594	0.0594	0.0594	0.03937	0.03937	0.03937	0.03937	0.39776	0.39776	0.39776	0.39776	0.9964	0.0049	0.9793	0.0036	0.0011	0.1262	0.9951	0.9989	0.9938	0.0207	0.8738	0.0062	0.18	0.19	TRUE	10.7501
94c8_070_852	NCU04111.2	1.68776	1	1.0793	1.20993	0.3312	0.25102	0.23564	0.32139	0.34179	0.29385	0.27196	0.34269	0.15956	0.15956	0.15956	0.15956	0.07744	0.07744	0.07744	0.07744	0.26744	0.26744	0.26744	0.26744	0.9926	0.9872	0.9482	0.0074	0.327	0.1481	0.0128	0.673	0.2261	0.0518	0.8519	0.7739	0.33	0.3	TRUE	4.12121
99h12_060_763	NCU03803.2	2.58349	1	1.24151	1.35353	0.53777	0.2865	0.30015	0.39824	0.51874	0.34602	0.35435	0.4964	0.18381	0.18381	0.18381	0.18381	0.08732	0.08732	0.08732	0.08732	0.30229	0.30229	0.30229	0.30229	0.9991	0.9974	0.9896	0.0009	0.1473	0.0842	0.0026	0.8527	0.2973	0.0104	0.9158	0.7027	0.35	0.34	TRUE	3.3735
99h12_270_2194	NCU03823.2	1.0525	1	1.05881	1.01165	0.11354	0.11099	0.11619	0.11166	0.12406	0.1207	0.12149	0.11921	0.08248	0.08248	0.08248	0.08248	0.03607	0.03607	0.03607	0.03607	0.1236	0.1236	0.1236	0.1236	0.7568	0.4647	0.6979	0.2432	0.2446	0.4357	0.5353	0.7554	0.7479	0.3021	0.5643	0.2521	0.18	0.16	TRUE	9.54384
9g6_020_297	NCU04155.2	1.16168	1	1.28614	1.34503	0.47539	0.39282	0.75688	0.64152	0.57471	0.46727	0.96329	0.80605	0.26395	0.26395	0.26395	0.26395	0.14916	0.14916	0.14916	0.14916	0.57461	0.57461	0.57461	0.57461	0.7272	0.3911	0.3438	0.2728	0.2783	0.1388	0.6089	0.7217	0.4568	0.6562	0.8612	0.5432	0.23	0.49	TRUE	2.10368
9g6_230_691	NCU04135.2	1.00127	1	1.17031	1.01359	0.13238	0.12628	0.14556	0.12975	0.13564	0.14122	0.15075	0.13808	0.09367	0.09367	0.09367	0.09367	0.04264	0.04264	0.04264	0.04264	0.13981	0.13981	0.13981	0.13981	0.5049	0.0522	0.4439	0.4951	0.0686	0.4324	0.9478	0.9314	0.94	0.5561	0.5676	0.06	0.21	0.18	TRUE	8.73911
9g6_260_1005	NCU04132.2	1.50246	1	2.8176	1.4685	0.58412	0.43804	1.39125	0.81228	0.79378	0.71922	1.20679	1.39359	0.3321	0.3321	0.3321	0.3321	0.16341	0.16341	0.16341	0.16341	0.54836	0.54836	0.54836	0.54836	0.8936	0.0556	0.5345	0.1064	0.0286	0.164	0.9444	0.9714	0.8678	0.4655	0.836	0.1322	0.36	0.24	TRUE	0.114027
9g6_310_42	NCU04127.2	1.21758	1	1.93846	1.06667	0.335	0.25708	0.48946	0.26407	0.40562	0.34207	0.45535	0.30501	0.17821	0.17821	0.17821	0.17821	0.08369	0.08369	0.08369	0.08369	0.28594	0.28594	0.28594	0.28594	0.8638	0.0318	0.7409	0.1362	0.0129	0.342	0.9682	0.9871	0.9926	0.2591	0.658	0.0074	0.35	0.33	TRUE	1.77037
9g6_340_2086	NCU04124.2	1.07603	1	1.36779	1.01593	0.23216	0.22778	0.29867	0.23445	0.27655	0.27298	0.30604	0.25729	0.18093	0.18093	0.18093	0.18093	0.07918	0.07918	0.07918	0.07918	0.24368	0.24368	0.24368	0.24368	0.6871	0.083	0.6261	0.3129	0.0653	0.4662	0.917	0.9347	0.9487	0.3739	0.5338	0.0513	0.34	0.31	TRUE	3.3285
b10c3_045_203	b10c3_045	1.36846	1	1.57737	1.2443	0.59572	0.50255	0.68584	0.63106	0.69364	0.7508	0.62508	0.79539	0.2213	0.2213	0.2213	0.2213	0.13434	0.13434	0.13434	0.13434	0.55585	0.55585	0.55585	0.55585	0.9044	0.3102	0.6125	0.0956	0.1304	0.2946	0.6898	0.8696	0.8494	0.3875	0.7054	0.1506	0.45	0.44	TRUE	3.09199
b10c3_050_198	NCU03332.2	7.13192	1	7.06184	2.37146	1.75188	0.35743	1.94312	1.05275	1.6614	0.82184	1.30389	1.87036	0.14154	0.14154	0.14154	0.14154	0.09087	0.09087	0.09087	0.09087	0.51595	0.51595	0.51595	0.51595	0.9996	0.529	0.988	0.0004	0.0012	0.033	0.471	0.9988	0.9888	0.012	0.967	0.0112	0.28	0.34	TRUE	6.60566
b10c3_100_704	NCU03337.2a	1.06457	1	1.12749	1.02418	0.13106	0.12854	0.14256	0.12695	0.13582	0.14405	0.14769	0.13477	0.09439	0.09439	0.09439	0.09439	0.04257	0.04257	0.04257	0.04257	0.1358	0.1358	0.1358	0.1358	0.7691	0.2367	0.6563	0.2309	0.12	0.3759	0.7633	0.88	0.8682	0.3437	0.6241	0.1318	0.21	0.18	TRUE	7.80676
b10c3_150_2048	NCU03341.2	1.17233	1	1.13376	1.06744	0.18715	0.16932	0.18277	0.17822	0.20617	0.18395	0.19358	0.18208	0.12417	0.12417	0.12417	0.12417	0.05528	0.05528	0.05528	0.05528	0.1744	0.1744	0.1744	0.1744	0.9119	0.6209	0.7811	0.0881	0.1621	0.2781	0.3791	0.8379	0.7175	0.2189	0.7219	0.2825	0.26	0.23	TRUE	6.52686
b10c3_200_746	NCU03346.2a	1.23357	1	1.13955	1.06306	0.3682	0.26549	0.30962	0.26595	0.43698	0.32743	0.32272	0.28381	0.15198	0.15198	0.15198	0.15198	0.08247	0.08247	0.08247	0.08247	0.37051	0.37051	0.37051	0.37051	0.8625	0.6904	0.7855	0.1375	0.2311	0.325	0.3096	0.7689	0.6993	0.2145	0.675	0.3007	0.35	0.32	TRUE	4.83948
b10d6_040_1003	NCU02865.2	1.27921	1	1.37488	1.1595	0.43512	0.31749	0.47262	0.37145	0.50019	0.39658	0.54922	0.4559	0.25549	0.25549	0.25549	0.25549	0.1172	0.1172	0.1172	0.1172	0.35345	0.35345	0.35345	0.35345	0.8599	0.3898	0.6392	0.1401	0.1415	0.2573	0.6102	0.8585	0.7619	0.3608	0.7427	0.2381	0.45	0.42	TRUE	1.60044
b10h18_080_373	NCU04033.2	1.18668	1	1.31761	1.08501	0.49559	0.47159	0.71529	0.6871	0.57787	0.63406	0.82043	1.04956	0.32202	0.32202	0.32202	0.32202	0.17754	0.17754	0.17754	0.17754	0.7024	0.7024	0.7024	0.7024	0.6978	0.3693	0.5801	0.3022	0.2698	0.43	0.6307	0.7302	0.6322	0.4199	0.57	0.3678	0.18	0.36	TRUE	0.550289
b10h18_150_1175	NCU04038.2	1.18425	1	1.13559	1.09266	0.17458	0.1589	0.20271	0.19959	0.20089	0.17463	0.20763	0.22092	0.10606	0.10606	0.10606	0.10606	0.05179	0.05179	0.05179	0.05179	0.20286	0.20286	0.20286	0.20286	0.9333	0.6799	0.7528	0.0667	0.1555	0.1779	0.3201	0.8445	0.6377	0.2472	0.8221	0.3623	0.25	0.22	TRUE	7.48855
b10h18_220_1430	NCU04045.2	1.10738	1	1.15356	1.0461	0.09952	0.08975	0.09353	0.09232	0.09695	0.09146	0.09675	0.09433	0.06177	0.06177	0.06177	0.06177	0.02815	0.02815	0.02815	0.02815	0.10081	0.10081	0.10081	0.10081	0.9468	0.2253	0.8152	0.0532	0.0312	0.2041	0.7747	0.9688	0.9428	0.1848	0.7959	0.0572	0.21	0.34	TRUE	11.5757
b10h4_030_447	NCU01191.2	1.38	1	1.03155	1.10173	0.37524	0.28316	0.2786	0.31181	0.40249	0.34914	0.31659	0.37208	0.23079	0.23079	0.23079	0.23079	0.09892	0.09892	0.09892	0.09892	0.28478	0.28478	0.28478	0.28478	0.9117	0.9177	0.8214	0.0883	0.4415	0.3111	0.0823	0.5585	0.3696	0.1786	0.6889	0.6304	0.41	0.37	TRUE	1.55859
b10h4_050_2725	NCU01189.2	1.13893	1	1.01968	1.01047	0.26202	0.22739	0.23773	0.23345	0.27948	0.26171	0.27412	0.26165	0.1856	0.1856	0.1856	0.1856	0.07854	0.07854	0.07854	0.07854	0.23795	0.23795	0.23795	0.23795	0.7827	0.7529	0.7421	0.2173	0.4585	0.4796	0.2471	0.5415	0.5287	0.2579	0.5204	0.4713	0.35	0.32	TRUE	1.9241
b10h4_120_294	NCU01182.2	1.30975	1	3.65802	1.60568	0.71891	0.72371	1.75851	1.0751	1.23938	2.36343	1.40558	1.89113	0.49912	0.49912	0.49912	0.49912	0.24903	0.24903	0.24903	0.24903	0.89247	0.89247	0.89247	0.89247	0.6905	0.0225	0.3899	0.3095	0.0595	0.302	0.9775	0.9405	0.9233	0.6101	0.698	0.0767	0.21	0.17	TRUE	-1.85036
b10h4_130_1188	NCU01181.2	2.41316	1	1.38078	3.47404	0.54351	0.22805	0.2681	0.58985	0.56383	0.28956	0.31915	0.5618	0.13375	0.13375	0.13375	0.13375	0.06584	0.06584	0.06584	0.06584	0.24447	0.24447	0.24447	0.24447	0.9987	0.9966	0.0269	0.0013	0.0404	0.0001	0.0034	0.9596	0.0008	0.9731	0.9999	0.9992	0.26	0.26	TRUE	4.87774
b10k17_010_378	NCU09461.2	1.12733	1	1.2012	1.07073	0.23841	0.22271	0.26012	0.23436	0.25254	0.2591	0.28351	0.27968	0.17209	0.17209	0.17209	0.17209	0.07708	0.07708	0.07708	0.07708	0.2248	0.2248	0.2248	0.2248	0.7904	0.3282	0.616	0.2096	0.1561	0.3175	0.6718	0.8439	0.7607	0.384	0.6825	0.2393	0.33	0.3	TRUE	4.11042
b10k17_120_3004	NCU09472.2	1.07481	1	1.09415	1.01359	0.16491	0.15582	0.16331	0.15229	0.1727	0.16832	0.17949	0.16906	0.11488	0.11488	0.11488	0.11488	0.05093	0.05093	0.05093	0.05093	0.16781	0.16781	0.16781	0.16781	0.762	0.4302	0.6947	0.238	0.2147	0.4454	0.5698	0.7853	0.7744	0.3053	0.5546	0.2256	0.24	0.21	TRUE	7.06682
b10k17_140_651	NCU09474.2	1.186	1	1.31397	1.10298	0.18401	0.16534	0.19978	0.17243	0.20178	0.18474	0.21275	0.19768	0.12073	0.12073	0.12073	0.12073	0.05335	0.05335	0.05335	0.05335	0.16305	0.16305	0.16305	0.16305	0.9262	0.176	0.7338	0.0738	0.0331	0.1827	0.824	0.9669	0.9288	0.2662	0.8173	0.0712	0.25	0.23	TRUE	6.5036
b10n12_080_1391	NCU01256.2	1.3958	1	1.18544	1.09222	0.47524	0.35106	0.51177	0.56237	0.43703	0.41631	0.56996	0.83742	0.2017	0.2017	0.2017	0.2017	0.12175	0.12175	0.12175	0.12175	0.51873	0.51873	0.51873	0.51873	0.9215	0.8007	0.7771	0.0785	0.264	0.3687	0.1993	0.736	0.5938	0.2229	0.6313	0.4062	0.45	0.41	TRUE	3.90243
b11a5_030_1955	NCU04295.2	3.92619	1	4.11283	1.72976	1.42574	0.45329	1.79328	0.90015	1.41775	0.80994	1.77161	1.87989	0.37242	0.37242	0.37242	0.37242	0.16217	0.16217	0.16217	0.16217	0.47665	0.47665	0.47665	0.47665	0.9984	0.4556	0.949	0.0016	0.0077	0.0787	0.5444	0.9923	0.9343	0.051	0.9213	0.0657	0.48	0.44	TRUE	-4.30574
b11a5_200_2164	NCU04279.2	1.14062	1	1.09854	1.42801	0.38923	0.36268	0.41283	0.53662	0.47723	0.44939	0.51564	0.65853	0.28458	0.28458	0.28458	0.28458	0.12843	0.12843	0.12843	0.12843	0.37858	0.37858	0.37858	0.37858	0.7093	0.5666	0.2448	0.2907	0.3729	0.1219	0.4334	0.6271	0.2021	0.7552	0.8781	0.7979	0.48	0.45	TRUE	0.484216
b11b22_060_3268	NCU08496.2	1.11783	1	1.27502	1.01971	0.26134	0.22998	0.27797	0.22615	0.27498	0.26977	0.30003	0.27029	0.17632	0.17632	0.17632	0.17632	0.078	0.078	0.078	0.078	0.239	0.239	0.239	0.239	0.7619	0.2006	0.6975	0.2381	0.1078	0.4463	0.7994	0.8922	0.9073	0.3025	0.5537	0.0927	0.34	0.3	TRUE	1.73814
b11b23_110_859	NCU03415.2	9.61276	1	3.88399	1.80484	2.97811	0.45262	1.56467	0.84436	2.05254	0.79064	2.51226	1.59644	0.36849	0.36849	0.36849	0.36849	0.15064	0.15064	0.15064	0.15064	0.3978	0.3978	0.3978	0.3978	1	0.9809	0.9988	0	0.0039	0.0584	0.0191	0.9961	0.9664	0.0012	0.9416	0.0336	0.38	0.39	TRUE	-4.76819
b11b23_130_2596	NCU03417.2	1.10994	1	1.18847	1.03237	0.19149	0.17423	0.20326	0.18787	0.20286	0.20554	0.21563	0.20677	0.13704	0.13704	0.13704	0.13704	0.06031	0.06031	0.06031	0.06031	0.19166	0.19166	0.19166	0.19166	0.8062	0.2808	0.6969	0.1938	0.1175	0.3945	0.7192	0.8825	0.8671	0.3031	0.6055	0.1329	0.28	0.25	TRUE	4.03698
b11b23_160_1382	NCU03422.2	1.13175	1	1.1227	1.0064	0.24759	0.23164	0.25458	0.247	0.27981	0.27969	0.28787	0.27712	0.18839	0.18839	0.18839	0.18839	0.08128	0.08128	0.08128	0.08128	0.25206	0.25206	0.25206	0.25206	0.7797	0.5189	0.737	0.2203	0.2711	0.4855	0.4811	0.7289	0.7427	0.263	0.5145	0.2573	0.36	0.32	TRUE	3.47282
b11c21_140_883	NCU01454.2	1.03756	1	1.08673	1.02169	0.0757	0.07322	0.08075	0.07584	0.07927	0.07787	0.08277	0.07836	0.05238	0.05238	0.05238	0.05238	0.02344	0.02344	0.02344	0.02344	0.08765	0.08765	0.08765	0.08765	0.787	0.1634	0.6172	0.213	0.0794	0.3196	0.8366	0.9206	0.8889	0.3828	0.6804	0.1111	0.42	0.43	TRUE	12.6816
b11c21_180_1457	NCU01449.2	1.05738	1	1.17725	2.40187	0.31028	0.26827	0.32612	0.54369	0.40817	0.35106	0.40315	0.49649	0.22127	0.22127	0.22127	0.22127	0.093	0.093	0.093	0.093	0.28051	0.28051	0.28051	0.28051	0.6173	0.2942	0.0045	0.3827	0.2359	0.0019	0.7058	0.7641	0.0049	0.9955	0.9981	0.9951	0.37	0.36	TRUE	1.63405
b11e5_050_732	NCU01469.2a	1.06783	1	1.14554	1.02953	0.21088	0.20066	0.2299	0.20358	0.22788	0.22346	0.24632	0.23449	0.15716	0.15716	0.15716	0.15716	0.06917	0.06917	0.06917	0.06917	0.21022	0.21022	0.21022	0.21022	0.6888	0.3076	0.5928	0.3112	0.205	0.4163	0.6924	0.795	0.7733	0.4072	0.5837	0.2267	0.31	0.28	TRUE	4.70244
b11e5_070_438	NCU01470.2	1.31472	1	1.18421	1.00082	0.42195	0.34453	0.51735	0.51483	0.41463	0.41425	0.57362	0.78371	0.19593	0.19593	0.19593	0.19593	0.11752	0.11752	0.11752	0.11752	0.50576	0.50576	0.50576	0.50576	0.8894	0.7207	0.8	0.1106	0.2686	0.5049	0.2793	0.7314	0.6764	0.2	0.4951	0.3236	0.44	0.41	TRUE	3.69571
b11e5_120_721	NCU01475.2	1.09421	1	1.08299	1.03586	0.09392	0.09598	0.09259	0.09414	0.10016	0.09164	0.10115	0.09708	0.06619	0.06619	0.06619	0.06619	0.02959	0.02959	0.02959	0.02959	0.09922	0.09922	0.09922	0.09922	0.9236	0.5666	0.7953	0.0764	0.1219	0.2579	0.4334	0.8781	0.7776	0.2047	0.7421	0.2224	0.15	0.4	TRUE	10.5057
b11e5_170_1570	NCU01480.2	1.04819	1	1.08936	1.09423	0.2214	0.20972	0.25639	0.2525	0.23847	0.24303	0.28131	0.29702	0.15507	0.15507	0.15507	0.15507	0.07547	0.07547	0.07547	0.07547	0.25816	0.25816	0.25816	0.25816	0.6322	0.3789	0.3944	0.3678	0.3055	0.2571	0.6211	0.6945	0.4877	0.6056	0.7429	0.5123	0.33	0.29	TRUE	3.29549
b11e5_180_1101	NCU09556.2	1.43986	1	1.03849	1.15177	0.28675	0.21293	0.24969	0.28554	0.3086	0.24227	0.26776	0.3259	0.15557	0.15557	0.15557	0.15557	0.07458	0.07458	0.07458	0.07458	0.26457	0.26457	0.26457	0.26457	0.9797	0.972	0.8887	0.0203	0.4077	0.1678	0.028	0.5923	0.2662	0.1113	0.8322	0.7338	0.33	0.3	TRUE	3.54807
b11e5_200_233	b11e5_200	1.10289	1	1.64174	1.00026	0.26706	0.24381	0.31753	0.2184	0.29825	0.29774	0.33271	0.26398	0.15534	0.15534	0.15534	0.15534	0.07552	0.07552	0.07552	0.07552	0.27641	0.27641	0.27641	0.27641	0.7168	0.0187	0.7148	0.2832	0.0174	0.5009	0.9813	0.9826	0.9897	0.2852	0.4991	0.0103	0.32	0.3	TRUE	3.14311
b11e5_210_759	NCU09553.2	1.10038	1	1.00793	1.00423	0.38267	0.36503	0.46283	0.51745	0.35699	0.40198	0.52921	0.73419	0.185	0.185	0.185	0.185	0.11476	0.11476	0.11476	0.11476	0.52689	0.52689	0.52689	0.52689	0.7073	0.7021	0.6278	0.2927	0.4939	0.5035	0.2979	0.5061	0.5066	0.3722	0.4965	0.4934	0.43	0.4	TRUE	4.404
b11e5_230_1616	NCU09551.2	1.35017	1	1.23605	1.14405	0.36791	0.30163	0.34866	0.34593	0.41499	0.36926	0.40075	0.41655	0.24471	0.24471	0.24471	0.24471	0.10299	0.10299	0.10299	0.10299	0.28496	0.28496	0.28496	0.28496	0.911	0.6668	0.741	0.089	0.2014	0.2735	0.3332	0.7986	0.6341	0.259	0.7265	0.3659	0.43	0.39	TRUE	1.45746
b11e5_240_633	NCU09550.2	1.10436	1	1.26928	1.15803	0.14304	0.13217	0.15476	0.15114	0.14753	0.14131	0.16167	0.15667	0.09658	0.09658	0.09658	0.09658	0.04265	0.04265	0.04265	0.04265	0.14075	0.14075	0.14075	0.14075	0.8703	0.0598	0.3054	0.1297	0.0229	0.0671	0.9402	0.9771	0.8638	0.6946	0.9329	0.1362	0.21	0.19	TRUE	8.19519
b11e5_340_818	NCU09541.2	1.04422	1	1.07054	1.21247	0.29331	0.29207	0.30475	0.34234	0.34579	0.35559	0.358	0.39962	0.24142	0.24142	0.24142	0.24142	0.10222	0.10222	0.10222	0.10222	0.30292	0.30292	0.30292	0.30292	0.5825	0.4459	0.2745	0.4175	0.3881	0.1976	0.5541	0.6119	0.2864	0.7255	0.8024	0.7136	0.42	0.39	TRUE	1.46858
b11e5_400_1211	NCU09535.2	1.21873	1	1.02785	1.02503	0.28044	0.27857	0.25945	0.29644	0.31826	0.33979	0.27794	0.33935	0.18342	0.18342	0.18342	0.18342	0.08715	0.08715	0.08715	0.08715	0.30095	0.30095	0.30095	0.30095	0.871	0.8428	0.8018	0.129	0.4459	0.4495	0.1572	0.5541	0.5186	0.1982	0.5505	0.4814	0.37	0.33	TRUE	2.65101
b11e6_010_227	NCU03520.2	1.26853	1	1.55167	1.19138	0.23524	0.19307	0.35264	0.34639	0.21923	0.20346	0.35237	0.44045	0.06718	0.06718	0.06718	0.06718	0.04396	0.04396	0.04396	0.04396	0.34318	0.34318	0.34318	0.34318	0.968	0.0463	0.7166	0.032	0.0186	0.0898	0.9537	0.9814	0.9198	0.2834	0.9102	0.0802	0.22	0.2	TRUE	9.92219
b11e6_080_3868	NCU03514.2	1.60398	1	1.03995	1.08893	0.41446	0.28122	0.28213	0.3152	0.43948	0.36171	0.33941	0.36038	0.23162	0.23162	0.23162	0.23162	0.09968	0.09968	0.09968	0.09968	0.28293	0.28293	0.28293	0.28293	0.9685	0.9692	0.9372	0.0315	0.4333	0.3255	0.0308	0.5667	0.4068	0.0628	0.6745	0.5932	0.4	0.38	TRUE	1.18757
b11e6_110_1214	NCU03512.2	1.14354	1	1.1179	1.01687	0.28535	0.26311	0.29401	0.26873	0.31379	0.30682	0.32308	0.32196	0.21347	0.21347	0.21347	0.21347	0.09055	0.09055	0.09055	0.09055	0.27359	0.27359	0.27359	0.27359	0.7653	0.5482	0.7055	0.2347	0.3028	0.4727	0.4518	0.6972	0.6857	0.2945	0.5273	0.3143	0.39	0.35	TRUE	-0.381372
b11h7_150_1518	NCU06731.2	1.08289	1	1.26462	1.06833	0.4185	0.2432	0.38415	0.24404	0.49212	0.26746	0.42267	0.24634	0.09847	0.09847	0.09847	0.09847	0.06495	0.06495	0.06495	0.06495	0.4078	0.4078	0.4078	0.4078	0.7253	0.2252	0.533	0.2747	0.1039	0.2503	0.7748	0.8961	0.9029	0.467	0.7497	0.0971	0.29	0.26	TRUE	7.91818
b11n2_010_2197	NCU03645.2	1.08935	1	1.16142	1.00537	0.11134	0.11057	0.12118	0.1081	0.12178	0.11871	0.12519	0.11616	0.07892	0.07892	0.07892	0.07892	0.03579	0.03579	0.03579	0.03579	0.11445	0.11445	0.11445	0.11445	0.881	0.1817	0.8305	0.119	0.0502	0.4595	0.8183	0.9498	0.9585	0.1695	0.5405	0.0415	0.18	0.15	TRUE	9.6221
b11n2_060_832	NCU03639.2	3.45321	1	2.75886	1.47489	0.8805	0.31894	0.706	0.49737	0.80089	0.51656	0.72955	0.73996	0.21868	0.21868	0.21868	0.21868	0.10329	0.10329	0.10329	0.10329	0.32855	0.32855	0.32855	0.32855	0.9995	0.8638	0.9923	0.0005	0.0028	0.0903	0.1362	0.9972	0.9842	0.0077	0.9097	0.0158	0.37	0.38	TRUE	0.667663
b11n2_220_1352	NCU03624.2	1.16793	1	1.31054	1.11386	0.09362	0.08035	0.09301	0.09055	0.09142	0.08261	0.10144	0.09246	0.05613	0.05613	0.05613	0.05613	0.02553	0.02553	0.02553	0.02553	0.08973	0.08973	0.08973	0.08973	0.9876	0.0286	0.7899	0.0124	0.0022	0.0342	0.9714	0.9978	0.9903	0.2101	0.9658	0.0097	0.34	0.27	TRUE	12.5233
b11n2_230_172	NCU03623.2	1.09572	1	1.04829	1.06545	0.14988	0.13605	0.14509	0.14348	0.15923	0.14862	0.1485	0.15911	0.10134	0.10134	0.10134	0.10134	0.04501	0.04501	0.04501	0.04501	0.14627	0.14627	0.14627	0.14627	0.8414	0.7037	0.6143	0.1586	0.321	0.2303	0.2963	0.679	0.4285	0.3857	0.7697	0.5715	0.22	0.19	TRUE	7.67508
b11n2_240_1770	NCU03622.2	1.42203	1	1.06682	1.05456	0.38803	0.31099	0.28024	0.2754	0.42029	0.36895	0.32222	0.34077	0.19849	0.19849	0.19849	0.19849	0.09444	0.09444	0.09444	0.09444	0.31175	0.31175	0.31175	0.31175	0.9215	0.9205	0.8933	0.0785	0.385	0.3742	0.0795	0.615	0.5252	0.1067	0.6258	0.4748	0.39	0.35	TRUE	1.87128
b11n2_280_1608	NCU03618.2	1.24687	1	1.13097	1.01647	0.31617	0.26034	0.31816	0.28376	0.34444	0.3282	0.3647	0.34658	0.22471	0.22471	0.22471	0.22471	0.09662	0.09662	0.09662	0.09662	0.27816	0.27816	0.27816	0.27816	0.8664	0.6968	0.8127	0.1336	0.2905	0.4697	0.3032	0.7095	0.6922	0.1873	0.5303	0.3078	0.41	0.37	TRUE	-0.239639
b11o8_030_78	NCU01013.2	1.46811	1	1.31676	1.01551	0.24805	0.19012	0.20205	0.17106	0.25055	0.22357	0.21242	0.1946	0.11505	0.11505	0.11505	0.11505	0.05539	0.05539	0.05539	0.05539	0.2008	0.2008	0.2008	0.2008	0.9838	0.8411	0.9837	0.0162	0.0421	0.4374	0.1589	0.9579	0.9723	0.0163	0.5626	0.0277	0.25	0.23	TRUE	5.36753
b11o8_060_553	NCU01010.2	1.19021	1	1.17398	1.20621	0.28883	0.26151	0.27193	0.29595	0.31103	0.29565	0.3289	0.34468	0.19968	0.19968	0.19968	0.19968	0.08798	0.08798	0.08798	0.08798	0.25429	0.25429	0.25429	0.25429	0.8389	0.5214	0.4737	0.1611	0.2088	0.1496	0.4786	0.7912	0.4358	0.5263	0.8504	0.5642	0.37	0.33	TRUE	2.93699
b11o8_120_2917	NCU01004.1	1.09445	1	1.13245	1.03175	0.17902	0.16623	0.18594	0.17884	0.19341	0.18147	0.19564	0.19387	0.12746	0.12746	0.12746	0.12746	0.05712	0.05712	0.05712	0.05712	0.18135	0.18135	0.18135	0.18135	0.7921	0.3729	0.6759	0.2079	0.1653	0.3874	0.6271	0.8347	0.7927	0.3241	0.6126	0.2073	0.27	0.24	TRUE	6.19491
b11o8_140_818	NCU01002.1	1.10133	1	1.21296	1.2563	0.26066	0.24266	0.26536	0.28821	0.2905	0.28005	0.29423	0.31881	0.18723	0.18723	0.18723	0.18723	0.08217	0.08217	0.08217	0.08217	0.23976	0.23976	0.23976	0.23976	0.7242	0.269	0.2426	0.2758	0.1607	0.1008	0.731	0.8393	0.4127	0.7574	0.8992	0.5873	0.35	0.32	TRUE	3.33668
b12f1_040_25	NCU03438.2	1.18227	1	1.13216	1.12463	0.37726	0.30488	0.34692	0.33739	0.43418	0.39098	0.39394	0.40512	0.26693	0.26693	0.26693	0.26693	0.11469	0.11469	0.11469	0.11469	0.3146	0.3146	0.3146	0.3146	0.7583	0.5726	0.5764	0.2417	0.3278	0.3048	0.4274	0.6722	0.4958	0.4236	0.6952	0.5042	0.46	0.41	TRUE	-0.00791936
b12f1_140_786	NCU03449.2	1.10203	1	1.35786	1.09219	0.15177	0.14434	0.16856	0.14971	0.15396	0.1572	0.1817	0.15988	0.10414	0.10414	0.10414	0.10414	0.04658	0.04658	0.04658	0.04658	0.14688	0.14688	0.14688	0.14688	0.8518	0.0242	0.5333	0.1482	0.0135	0.1719	0.9758	0.9865	0.9754	0.4667	0.8281	0.0246	0.22	0.19	TRUE	7.36244
b12f1_180_401	NCU03453.2	1.00352	1	1.02778	1.02939	0.08644	0.08738	0.09371	0.10221	0.08947	0.08553	0.1099	0.09906	0.05562	0.05562	0.05562	0.05562	0.02708	0.02708	0.02708	0.02708	0.11862	0.11862	0.11862	0.11862	0.5296	0.3144	0.3379	0.4704	0.3198	0.2734	0.6856	0.6802	0.4892	0.6621	0.7266	0.5108	0.37	0.31	TRUE	11.7108
b12j7_130_60	NCU02703.2	1.91459	1	1.12373	1.15981	0.7493	0.49498	0.44744	0.68817	0.65021	0.72876	0.55674	1.06268	0.26363	0.26363	0.26363	0.26363	0.15118	0.15118	0.15118	0.15118	0.59709	0.59709	0.59709	0.59709	0.9687	0.9585	0.8669	0.0313	0.3656	0.3859	0.0415	0.6344	0.4704	0.1331	0.6141	0.5296	0.25	0.49	TRUE	2.05332
b12j7_150_1627	NCU02701.2	1.67098	1	1.86845	1.01245	0.39118	0.27613	0.46131	0.28856	0.43333	0.35332	0.48813	0.37714	0.21529	0.21529	0.21529	0.21529	0.09232	0.09232	0.09232	0.09232	0.28168	0.28168	0.28168	0.28168	0.9865	0.2758	0.9738	0.0135	0.0133	0.4647	0.7242	0.9867	0.989	0.0262	0.5353	0.011	0.37	0.35	TRUE	1.65582
b12j7_160_1134	NCU02700.2	1.15157	1	1.1833	1.05728	0.19174	0.16767	0.19232	0.1789	0.19474	0.18591	0.20171	0.19316	0.125	0.125	0.125	0.125	0.05523	0.05523	0.05523	0.05523	0.1759	0.1759	0.1759	0.1759	0.8801	0.4087	0.75	0.1199	0.1146	0.2944	0.5913	0.8854	0.833	0.25	0.7056	0.167	0.26	0.23	TRUE	6.44879
b12j7_220_1642	NCU02694.2	1.06927	1	1.20803	1.03192	0.23373	0.21818	0.24447	0.22412	0.25118	0.24122	0.28259	0.25761	0.1689	0.1689	0.1689	0.1689	0.07384	0.07384	0.07384	0.07384	0.21888	0.21888	0.21888	0.21888	0.6824	0.2034	0.5857	0.3176	0.1443	0.4209	0.7966	0.8557	0.8494	0.4143	0.5791	0.1506	0.33	0.29	TRUE	1.96122
b12j7_230_857	NCU02693.2	1.18357	1	1.25362	1.04708	0.2886	0.26169	0.29088	0.28168	0.33723	0.3095	0.34126	0.3049	0.20561	0.20561	0.20561	0.20561	0.09027	0.09027	0.09027	0.09027	0.27572	0.27572	0.27572	0.27572	0.8144	0.3671	0.7233	0.1856	0.1501	0.4012	0.6329	0.8499	0.8338	0.2767	0.5988	0.1662	0.38	0.34	TRUE	0.0248627
b12j7_250_572	NCU02691.2	1.06185	1	1.08464	1.00581	0.26795	0.25002	0.27796	0.26038	0.29619	0.29023	0.30874	0.30882	0.20577	0.20577	0.20577	0.20577	0.08804	0.08804	0.08804	0.08804	0.26828	0.26828	0.26828	0.26828	0.6275	0.4469	0.6079	0.3725	0.3501	0.4923	0.5531	0.6499	0.665	0.3921	0.5077	0.335	0.38	0.35	TRUE	2.87602
b12j7_280_1117	NCU02688.2	1.79209	1	1.85363	1.01585	0.51988	0.31707	0.69214	0.4498	0.393	0.38821	0.59335	0.88415	0.14418	0.14418	0.14418	0.14418	0.09046	0.09046	0.09046	0.09046	0.47914	0.47914	0.47914	0.47914	0.9838	0.4094	0.9345	0.0162	0.0335	0.4736	0.5906	0.9665	0.9242	0.0655	0.5264	0.0758	0.36	0.34	TRUE	5.94072
b12k8_010_4485	NCU01315.2	1.02654	1	1.07852	1.01943	0.07876	0.08106	0.07952	0.07752	0.08062	0.07935	0.08775	0.08099	0.05448	0.05448	0.05448	0.05448	0.02424	0.02424	0.02424	0.02424	0.08743	0.08743	0.08743	0.08743	0.7077	0.1563	0.5577	0.2923	0.1	0.3416	0.8437	0.9	0.8742	0.4423	0.6584	0.1258	0.32	0.27	TRUE	12.4797
b12n19_100_447	NCU03502.2	1.02389	1	1.06815	1.01892	0.18766	0.188	0.19596	0.19111	0.19834	0.20075	0.22282	0.20858	0.1454	0.1454	0.1454	0.1454	0.0637	0.0637	0.0637	0.0637	0.20577	0.20577	0.20577	0.20577	0.5738	0.3637	0.5088	0.4262	0.3252	0.4449	0.6363	0.6748	0.6391	0.4912	0.5551	0.3609	0.3	0.26	TRUE	5.28867
b12n19_110_967	NCU03501.2	1.15261	1	1.23358	1.05876	0.21082	0.19278	0.23323	0.20172	0.23125	0.22229	0.24186	0.22725	0.14853	0.14853	0.14853	0.14853	0.06585	0.06585	0.06585	0.06585	0.19619	0.19619	0.19619	0.19619	0.8563	0.2936	0.7199	0.1437	0.101	0.3372	0.7064	0.899	0.8651	0.2801	0.6628	0.1349	0.3	0.27	TRUE	5.31255
b13a5_030_1003	NCU01347.2	1.13671	1	1.23192	1.08499	0.20206	0.17807	0.21014	0.19455	0.22343	0.21145	0.22831	0.21222	0.13833	0.13833	0.13833	0.13833	0.06068	0.06068	0.06068	0.06068	0.1825	0.1825	0.1825	0.1825	0.8477	0.257	0.6288	0.1523	0.0829	0.2516	0.743	0.9171	0.8434	0.3712	0.7484	0.1566	0.28	0.25	TRUE	5.74405
b13a5_080_73	NCU01351.2	1.20681	1	1.06653	1.01553	0.285	0.23832	0.25214	0.25469	0.30401	0.26368	0.29259	0.29827	0.19186	0.19186	0.19186	0.19186	0.08364	0.08364	0.08364	0.08364	0.25459	0.25459	0.25459	0.25459	0.8628	0.7688	0.8097	0.1372	0.368	0.458	0.2312	0.632	0.6172	0.1903	0.542	0.3828	0.36	0.33	TRUE	2.05443
b13b3_060_3927	NCU08439.2	1.11833	1	1.19176	1.08632	0.08099	0.07251	0.08029	0.08285	0.08742	0.07872	0.08695	0.08212	0.05188	0.05188	0.05188	0.05188	0.02327	0.02327	0.02327	0.02327	0.0843	0.0843	0.0843	0.0843	0.9727	0.0986	0.7061	0.0273	0.009	0.0622	0.9014	0.991	0.9563	0.2939	0.9378	0.0437	0.36	0.28	TRUE	12.896
b13b3_070_206	NCU08438.2	1.19331	1	1.23593	1.04102	0.24807	0.22045	0.2576	0.22131	0.26285	0.24456	0.27956	0.25793	0.16926	0.16926	0.16926	0.16926	0.07608	0.07608	0.07608	0.07608	0.23197	0.23197	0.23197	0.23197	0.8727	0.4035	0.7879	0.1273	0.1177	0.3955	0.5965	0.8823	0.8596	0.2121	0.6045	0.1404	0.33	0.29	TRUE	3.93185
b13b3_080_246	NCU08437.2	1.1156	1	1.17305	1.14142	0.28034	0.2517	0.28976	0.28909	0.29351	0.30204	0.33376	0.33127	0.20184	0.20184	0.20184	0.20184	0.08674	0.08674	0.08674	0.08674	0.26371	0.26371	0.26371	0.26371	0.7317	0.3739	0.4531	0.2683	0.2184	0.2336	0.6261	0.7816	0.5622	0.5469	0.7664	0.4378	0.38	0.34	TRUE	2.83261
b13b3_130_520	NCU08432.2	1.25775	1	1.16095	1.03117	0.2287	0.18818	0.20707	0.19345	0.24104	0.22068	0.23787	0.22046	0.14991	0.14991	0.14991	0.14991	0.06591	0.06591	0.06591	0.06591	0.1916	0.1916	0.1916	0.1916	0.9395	0.734	0.892	0.0605	0.172	0.4117	0.266	0.828	0.8096	0.108	0.5883	0.1904	0.3	0.27	TRUE	5.28348
b13b3_140_891	NCU08431.2	1.1311	1	1.18919	1.04359	0.22027	0.20208	0.26015	0.23076	0.23996	0.22034	0.28649	0.26525	0.1432	0.1432	0.1432	0.1432	0.06793	0.06793	0.06793	0.06793	0.23937	0.23937	0.23937	0.23937	0.8244	0.3439	0.694	0.1756	0.1453	0.3677	0.6561	0.8547	0.8005	0.306	0.6323	0.1995	0.31	0.28	TRUE	5.26506
b13b3_210_339	NCU08425.2	1.26907	1	1.15585	1.08845	0.31565	0.25558	0.29325	0.28992	0.35885	0.31779	0.33459	0.33205	0.21309	0.21309	0.21309	0.21309	0.09318	0.09318	0.09318	0.09318	0.2718	0.2718	0.2718	0.2718	0.8877	0.6954	0.7562	0.1123	0.2502	0.3282	0.3046	0.7498	0.6202	0.2438	0.6718	0.3798	0.39	0.35	TRUE	2.64034
b13b7_210_3128	NCU00423.2	1.83633	1	1.97397	1.26759	0.25268	0.15744	0.24914	0.19311	0.26381	0.1669	0.25922	0.21917	0.10251	0.10251	0.10251	0.10251	0.04609	0.04609	0.04609	0.04609	0.15474	0.15474	0.15474	0.15474	0.9995	0.2175	0.9908	0.0005	0.0004	0.0192	0.7825	0.9996	0.997	0.0092	0.9808	0.003	0.21	0.2	TRUE	7.12499
b13c5_030_3400	NCU00914.2	1.14293	1	1.01708	1.32296	0.24749	0.21712	0.22666	0.26763	0.27944	0.25974	0.26047	0.29648	0.17532	0.17532	0.17532	0.17532	0.07485	0.07485	0.07485	0.07485	0.22716	0.22716	0.22716	0.22716	0.8025	0.7799	0.2068	0.1975	0.4644	0.0527	0.2201	0.5356	0.0588	0.7932	0.9473	0.9412	0.34	0.3	TRUE	2.6709
b13c5_210_589	NCU00893.2	1.21672	1	1.20744	1.01333	0.14614	0.12443	0.1476	0.13312	0.15812	0.14052	0.15457	0.13377	0.09369	0.09369	0.09369	0.09369	0.04138	0.04138	0.04138	0.04138	0.14417	0.14417	0.14417	0.14417	0.9728	0.5485	0.9555	0.0272	0.0431	0.434	0.4515	0.9569	0.9646	0.0445	0.566	0.0354	0.2	0.18	TRUE	8.51456
b13d15_010_1418	NCU01997.2	2.10011	1	1.7067	1.14189	0.57443	0.26876	0.55009	0.36323	0.36405	0.41863	0.47695	0.64718	0.10203	0.10203	0.10203	0.10203	0.06457	0.06457	0.06457	0.06457	0.38485	0.38485	0.38485	0.38485	0.9847	0.9342	0.9645	0.0153	0.0446	0.1219	0.0658	0.9554	0.9129	0.0355	0.8781	0.0871	0.28	0.27	TRUE	8.23977
b13d15_120_2704	NCU01984.2	1.10684	1	1.12327	1.00452	0.16953	0.17005	0.17649	0.16572	0.19023	0.18502	0.19654	0.18421	0.12322	0.12322	0.12322	0.12322	0.05514	0.05514	0.05514	0.05514	0.17374	0.17374	0.17374	0.17374	0.8207	0.442	0.7855	0.1793	0.1783	0.4793	0.558	0.8217	0.8459	0.2145	0.5207	0.1541	0.26	0.22	TRUE	6.75328
b13d15_260_408	NCU01970.2	6.20419	1	6.66125	2.47403	1.64332	0.34495	1.63084	0.81022	1.69954	0.56176	1.65492	1.25899	0.25731	0.25731	0.25731	0.25731	0.10936	0.10936	0.10936	0.10936	0.29854	0.29854	0.29854	0.29854	0.9999	0.3661	0.9965	0.0001	0	0.0044	0.6339	1	0.9988	0.0035	0.9956	0.0012	0.32	0.4	TRUE	0.382998
b13d15_290_306	NCU01967.2	1.13925	1	1.25808	1.05663	0.15642	0.14248	0.17574	0.14857	0.16929	0.15745	0.16741	0.17167	0.10844	0.10844	0.10844	0.10844	0.04806	0.04806	0.04806	0.04806	0.15697	0.15697	0.15697	0.15697	0.9014	0.1523	0.7592	0.0986	0.0391	0.2776	0.8477	0.9609	0.9454	0.2408	0.7224	0.0546	0.23	0.2	TRUE	7.42489
b13d24_020_661	NCU10226.2a	1.14538	1	1.20636	1.21694	0.25722	0.22682	0.27093	0.27536	0.29323	0.27703	0.3081	0.30633	0.18504	0.18504	0.18504	0.18504	0.07931	0.07931	0.07931	0.07931	0.23207	0.23207	0.23207	0.23207	0.801	0.3725	0.375	0.199	0.167	0.1178	0.6275	0.833	0.4786	0.625	0.8822	0.5214	0.35	0.32	TRUE	3.51268
b13d24_050_269	NCU02277.2	1.03569	1	1.16885	1.00004	0.16022	0.14875	0.16763	0.14958	0.15925	0.16561	0.17614	0.16164	0.11153	0.11153	0.11153	0.11153	0.05035	0.05035	0.05035	0.05035	0.16444	0.16444	0.16444	0.16444	0.638	0.12	0.6261	0.362	0.1008	0.5053	0.88	0.8992	0.9246	0.3739	0.4947	0.0754	0.24	0.21	TRUE	6.31881
b13d24_130_866	NCU02269.2	1.10125	1	1.28686	1.05891	0.18688	0.17158	0.20022	0.18457	0.2049	0.19198	0.21634	0.19113	0.12955	0.12955	0.12955	0.12955	0.05778	0.05778	0.05778	0.05778	0.17902	0.17902	0.17902	0.17902	0.7937	0.0981	0.6104	0.2063	0.0456	0.3066	0.9019	0.9544	0.9432	0.3896	0.6934	0.0568	0.27	0.23	TRUE	5.77783
b13d24_260_1579	NCU02257.2	1.05192	1	1.03015	1.08805	0.29792	0.29349	0.31695	0.35371	0.35036	0.33744	0.39501	0.39217	0.22892	0.22892	0.22892	0.22892	0.10685	0.10685	0.10685	0.10685	0.33326	0.33326	0.33326	0.33326	0.5982	0.5333	0.4515	0.4018	0.4535	0.3409	0.4667	0.5465	0.4063	0.5485	0.6591	0.5937	0.43	0.39	TRUE	2.12084
b13h18_030_4085	NCU04611.2	1.4406	1	1.11693	1.00588	0.5044	0.41278	0.36918	0.36317	0.50725	0.59699	0.43149	0.51039	0.24848	0.24848	0.24848	0.24848	0.12724	0.12724	0.12724	0.12724	0.44258	0.44258	0.44258	0.44258	0.8759	0.857	0.8734	0.1241	0.354	0.4986	0.143	0.646	0.6718	0.1266	0.5014	0.3282	0.47	0.45	TRUE	1.80269
b13h18_080_1241	NCU04616.2	1.04979	1	1.10428	1.10497	0.15934	0.15181	0.16717	0.17675	0.17941	0.17029	0.17826	0.17793	0.11515	0.11515	0.11515	0.11515	0.05117	0.05117	0.05117	0.05117	0.16601	0.16601	0.16601	0.16601	0.679	0.2989	0.3302	0.321	0.2064	0.1741	0.7011	0.7936	0.5027	0.6698	0.8259	0.4973	0.24	0.21	TRUE	7.25087
b13h18_210_1408	NCU04626.2	1.40832	1	1.07015	1.87744	0.46136	0.33157	0.36237	0.65019	0.57415	0.42908	0.56004	0.64214	0.26626	0.26626	0.26626	0.26626	0.1225	0.1225	0.1225	0.1225	0.36773	0.36773	0.36773	0.36773	0.8977	0.8718	0.1753	0.1023	0.4082	0.0174	0.1282	0.5918	0.0542	0.8247	0.9826	0.9458	0.45	0.43	TRUE	1.50794
b13h18_250_1858	NCU04630.2	1.13044	1	1.16615	1.04303	0.16719	0.14846	0.16312	0.15113	0.16442	0.15884	0.17292	0.16813	0.1053	0.1053	0.1053	0.1053	0.04648	0.04648	0.04648	0.04648	0.16178	0.16178	0.16178	0.16178	0.8942	0.3674	0.7715	0.1058	0.0878	0.3174	0.6326	0.9122	0.8676	0.2285	0.6826	0.1324	0.23	0.2	TRUE	7.82322
b13i18_040_577	NCU01647.2	1.02034	1	1.0005	1.04181	0.18233	0.17931	0.18233	0.18282	0.2034	0.19449	0.20408	0.2027	0.1433	0.1433	0.1433	0.1433	0.06273	0.06273	0.06273	0.06273	0.18826	0.18826	0.18826	0.18826	0.5715	0.5735	0.4358	0.4285	0.5019	0.3674	0.4265	0.4981	0.3681	0.5642	0.6326	0.6319	0.29	0.26	TRUE	5.40613
b13m13_090_802	NCU01275.2	3.57711	1	4.02743	2.69695	0.55174	0.19348	0.60601	0.49376	0.62104	0.2888	0.47129	0.54531	0.11089	0.11089	0.11089	0.11089	0.0541	0.0541	0.0541	0.0541	0.21782	0.21782	0.21782	0.21782	0.9998	0.1396	0.9642	0.0002	0	0.0004	0.8604	1	0.9904	0.0358	0.9996	0.0096	0.22	0.23	TRUE	6.09999
b13m15_090_1709	NCU08563.2	1.06526	1	1.12846	1.01894	0.20266	0.18747	0.20409	0.19225	0.22393	0.21065	0.2205	0.21592	0.14563	0.14563	0.14563	0.14563	0.06402	0.06402	0.06402	0.06402	0.19875	0.19875	0.19875	0.19875	0.6944	0.3183	0.6165	0.3056	0.2034	0.4363	0.6817	0.7966	0.7875	0.3835	0.5637	0.2125	0.29	0.26	TRUE	3.42621
b13m15_120_1072	NCU08566.2	2.05258	1	1.26482	1.18635	1.1389	0.46652	0.46811	0.4623	0.99744	0.81205	0.62365	0.64068	0.23242	0.23242	0.23242	0.23242	0.13804	0.13804	0.13804	0.13804	0.57227	0.57227	0.57227	0.57227	0.9012	0.8901	0.8783	0.0988	0.2327	0.2204	0.1099	0.7673	0.6208	0.1217	0.7796	0.3792	0.45	0.45	TRUE	3.55914
b13n4_050_1557	NCU01865.2	1.32114	1	1.34688	1.04294	0.38003	0.27892	0.43046	0.30875	0.40737	0.33145	0.48793	0.37826	0.18268	0.18268	0.18268	0.18268	0.09624	0.09624	0.09624	0.09624	0.39857	0.39857	0.39857	0.39857	0.9224	0.4592	0.8514	0.0776	0.1155	0.3971	0.5408	0.8845	0.8649	0.1486	0.6029	0.1351	0.39	0.36	TRUE	3.40382
b13n4_080_1026	NCU01868.2	1.25287	1	1.00381	1.00566	0.36768	0.29114	0.39579	0.40936	0.36783	0.32969	0.49586	0.52605	0.19405	0.19405	0.19405	0.19405	0.10155	0.10155	0.10155	0.10155	0.39376	0.39376	0.39376	0.39376	0.8632	0.8635	0.79	0.1368	0.4985	0.4986	0.1365	0.5015	0.4926	0.21	0.5014	0.5074	0.41	0.38	TRUE	2.58484
b13o8_030_335	NCU01106.2	1.25735	1	1.6039	1.02653	0.23336	0.19584	0.2858	0.20603	0.2573	0.24083	0.27938	0.22906	0.1471	0.1471	0.1471	0.1471	0.06547	0.06547	0.06547	0.06547	0.19346	0.19346	0.19346	0.19346	0.9422	0.05	0.8985	0.0578	0.01	0.4148	0.95	0.99	0.993	0.1015	0.5852	0.007	0.29	0.26	TRUE	5.28153
b13o8_120_2305	NCU01097.2	1.9588	1	1.70591	1.20088	0.51742	0.30907	0.45965	0.36435	0.55046	0.42678	0.51542	0.45137	0.23721	0.23721	0.23721	0.23721	0.10151	0.10151	0.10151	0.10151	0.29788	0.29788	0.29788	0.29788	0.9904	0.7586	0.9643	0.0096	0.0337	0.1936	0.2414	0.9663	0.9357	0.0357	0.8064	0.0643	0.4	0.38	TRUE	1.53463
b13o8_200_1703	NCU01091.2	1.2133	1	1.15798	1.06093	0.34167	0.31002	0.29615	0.28612	0.41003	0.33979	0.34012	0.32259	0.20248	0.20248	0.20248	0.20248	0.0945	0.0945	0.0945	0.0945	0.32653	0.32653	0.32653	0.32653	0.8072	0.6039	0.7331	0.1928	0.248	0.3601	0.3961	0.752	0.7013	0.2669	0.6399	0.2987	0.4	0.37	TRUE	2.46963
b14a21_020_768	NCU08905.2	1.10483	1	1.05398	1.00399	0.20227	0.18233	0.19089	0.18249	0.21251	0.19883	0.20365	0.20145	0.14274	0.14274	0.14274	0.14274	0.06231	0.06231	0.06231	0.06231	0.18856	0.18856	0.18856	0.18856	0.7893	0.6527	0.745	0.2107	0.3503	0.4837	0.3473	0.6497	0.6594	0.255	0.5163	0.3406	0.29	0.26	TRUE	5.35816
b14a21_050_219	NCU08902.2	1.03489	1	1.09897	1.02533	0.13129	0.13591	0.13577	0.13554	0.14378	0.13708	0.15175	0.14574	0.09853	0.09853	0.09853	0.09853	0.04413	0.04413	0.04413	0.04413	0.1337	0.1337	0.1337	0.1337	0.6561	0.2306	0.5341	0.3439	0.1789	0.3904	0.7694	0.8211	0.788	0.4659	0.6096	0.212	0.21	0.19	TRUE	8.01674
b14a21_090_745	NCU08900.2	1.08836	1	1.07464	1.12109	0.168	0.15683	0.17236	0.18134	0.1987	0.18119	0.17188	0.18846	0.11891	0.11891	0.11891	0.11891	0.05195	0.05195	0.05195	0.05195	0.1737	0.1737	0.1737	0.1737	0.7914	0.543	0.3975	0.2086	0.2772	0.1483	0.457	0.7228	0.3339	0.6025	0.8517	0.6661	0.25	0.22	TRUE	6.65834
b14a21_240_930	NCU08886.2	1.21785	1	1.05001	1.05112	0.16905	0.13856	0.14951	0.14878	0.17128	0.16264	0.15965	0.16569	0.10803	0.10803	0.10803	0.10803	0.04792	0.04792	0.04792	0.04792	0.15854	0.15854	0.15854	0.15854	0.9566	0.9245	0.8934	0.0434	0.3226	0.2989	0.0755	0.6774	0.4946	0.1066	0.7011	0.5054	0.23	0.2	TRUE	7.33271
b14a6_030_1022	NCU01086.2	1.17025	1	1.40744	1.07105	0.48389	0.38913	0.47354	0.38752	0.62026	0.4616	0.58486	0.42694	0.25421	0.25421	0.25421	0.25421	0.12888	0.12888	0.12888	0.12888	0.4712	0.4712	0.4712	0.4712	0.7064	0.2531	0.6151	0.2936	0.1312	0.3753	0.7469	0.8688	0.8649	0.3849	0.6247	0.1351	0.47	0.45	TRUE	1.55891
b14a6_060_1136	NCU01083.2	1.02486	1	1.00866	1.02366	0.17938	0.12148	0.16509	0.12624	0.15111	0.10322	0.22873	0.09852	0.03383	0.03383	0.03383	0.03383	0.02258	0.02258	0.02258	0.02258	0.25884	0.25884	0.25884	0.25884	0.7651	0.6101	0.5092	0.2349	0.433	0.2426	0.3899	0.567	0.3674	0.4908	0.7574	0.6326	0.4	0.28	TRUE	13.6417
b14a6_090_1321	NCU01080.2	1.01567	1	1.07217	1.02203	0.09213	0.08953	0.08954	0.09299	0.09482	0.08898	0.09753	0.0963	0.06539	0.06539	0.06539	0.06539	0.02903	0.02903	0.02903	0.02903	0.10533	0.10533	0.10533	0.10533	0.6049	0.1675	0.4589	0.3951	0.1482	0.3457	0.8325	0.8518	0.8032	0.5411	0.6543	0.1968	0.42	0.3	TRUE	11.5095
b14a6_130_95	NCU01076.2	1.35319	1	4.49878	1.05628	0.28299	0.24448	0.73867	0.27949	0.37007	0.37894	0.56753	0.40523	0.14674	0.14674	0.14674	0.14674	0.07048	0.07048	0.07048	0.07048	0.25622	0.25622	0.25622	0.25622	0.9582	0.0002	0.9078	0.0418	0.0003	0.3334	0.9998	0.9997	0.9998	0.0922	0.6666	0.0002	0.24	0.28	TRUE	5.75054
b14a6_210_1212	NCU01068.2	3.41326	1	3.50566	1.34441	0.37761	0.15038	0.39475	0.21854	0.38598	0.18353	0.38875	0.23864	0.0978	0.0978	0.0978	0.0978	0.04387	0.04387	0.04387	0.04387	0.1517	0.1517	0.1517	0.1517	1	0.3752	1	0	0	0.0088	0.6248	1	1	0	0.9912	0	0.17	0.19	TRUE	8.25052
b14d6_130_2118	NCU06809.2	1.15991	1	1.22917	1.0312	0.1666	0.14681	0.16593	0.15565	0.17599	0.1643	0.18352	0.16766	0.10717	0.10717	0.10717	0.10717	0.04802	0.04802	0.04802	0.04802	0.15848	0.15848	0.15848	0.15848	0.9225	0.2569	0.846	0.0775	0.0515	0.3732	0.7431	0.9485	0.9462	0.154	0.6268	0.0538	0.23	0.2	TRUE	6.78051
b14d6_250_1827	NCU06791.2	1.11503	1	1.07858	1.01502	0.16566	0.15848	0.16897	0.16349	0.18503	0.17015	0.17644	0.17524	0.11635	0.11635	0.11635	0.11635	0.052	0.052	0.052	0.052	0.17184	0.17184	0.17184	0.17184	0.8532	0.6311	0.7877	0.1468	0.2551	0.4449	0.3689	0.7449	0.7268	0.2123	0.5551	0.2732	0.25	0.22	TRUE	7.20134
b14d6_490_4288	NCU06766.2	1.01054	1	1.06253	1.01729	0.14337	0.13599	0.14482	0.13899	0.14564	0.15234	0.15688	0.15347	0.10217	0.10217	0.10217	0.10217	0.04483	0.04483	0.04483	0.04483	0.15635	0.15635	0.15635	0.15635	0.5533	0.2778	0.4743	0.4467	0.2735	0.4181	0.7222	0.7265	0.6858	0.5257	0.5819	0.3142	0.22	0.19	TRUE	8.04644
b14d6_500_961	NCU06765.2	1.06717	1	1.05452	1.00714	0.16535	0.15643	0.16375	0.15434	0.16059	0.16746	0.17014	0.16775	0.11596	0.11596	0.11596	0.11596	0.051	0.051	0.051	0.051	0.16507	0.16507	0.16507	0.16507	0.7398	0.5475	0.7053	0.2602	0.3238	0.4686	0.4525	0.6762	0.6836	0.2947	0.5314	0.3164	0.24	0.21	TRUE	6.92291
b15b10_130_2473	NCU04772.2	1.17986	1	1.05549	1.12311	0.29006	0.26691	0.25952	0.30149	0.28998	0.30985	0.27898	0.36748	0.18195	0.18195	0.18195	0.18195	0.08737	0.08737	0.08737	0.08737	0.27723	0.27723	0.27723	0.27723	0.8394	0.7609	0.5986	0.1606	0.3948	0.2777	0.2391	0.6052	0.3566	0.4014	0.7223	0.6434	0.37	0.33	TRUE	3.69508
b15b24_080_605	NCU05345.2	2.31941	1	1.4103	1.07	0.38164	0.22515	0.21941	0.20588	0.31773	0.29049	0.23323	0.25923	0.09669	0.09669	0.09669	0.09669	0.05205	0.05205	0.05205	0.05205	0.26805	0.26805	0.26805	0.26805	0.9986	0.9953	0.9959	0.0014	0.0326	0.2778	0.0047	0.9674	0.9732	0.0041	0.7222	0.0268	0.24	0.23	TRUE	8.37861
b15b24_090_664	NCU05346.2	1.66451	1	1.21227	1.15897	0.57236	0.42213	0.41155	0.55984	0.44835	0.57079	0.42664	0.89421	0.17796	0.17796	0.17796	0.17796	0.10981	0.10981	0.10981	0.10981	0.51973	0.51973	0.51973	0.51973	0.9687	0.929	0.8582	0.0313	0.2122	0.3294	0.071	0.7878	0.5843	0.1418	0.6706	0.4157	0.41	0.39	TRUE	4.22883
b15b3_210_967	NCU02018.2	1.62098	1	1.1948	1.32485	0.19826	0.13428	0.15801	0.17964	0.20415	0.14969	0.1692	0.18641	0.09795	0.09795	0.09795	0.09795	0.04445	0.04445	0.04445	0.04445	0.1449	0.1449	0.1449	0.1449	0.999	0.9927	0.9566	0.001	0.0551	0.0098	0.0073	0.9449	0.1336	0.0434	0.9902	0.8664	0.21	0.19	TRUE	8.05263
b15b3_220_696	NCU02019.2	1.21298	1	1.20164	1.01045	0.11765	0.10233	0.12119	0.10739	0.12261	0.10987	0.11415	0.11698	0.07653	0.07653	0.07653	0.07653	0.03421	0.03421	0.03421	0.03421	0.11988	0.11988	0.11988	0.11988	0.9882	0.5587	0.9737	0.0118	0.0267	0.4286	0.4413	0.9733	0.9759	0.0263	0.5714	0.0241	0.17	0.15	TRUE	10.2211
b15i20_050_1445	NCU05394.2	1.15075	1	1.49763	1.01545	0.08112	0.07306	0.09791	0.07419	0.08589	0.07688	0.097	0.0751	0.0511	0.0511	0.0511	0.0511	0.02296	0.02296	0.02296	0.02296	0.07648	0.07648	0.07648	0.07648	0.9892	0.0007	0.9732	0.0108	0.0001	0.3573	0.9993	0.9999	0.9998	0.0268	0.6427	0.0002	0.25	0.34	TRUE	13.3386
b16b8_020_631	NCU02652.2	1.14672	1	1.28801	1.0541	0.136	0.12634	0.1538	0.12486	0.14559	0.13688	0.14983	0.14237	0.09252	0.09252	0.09252	0.09252	0.04143	0.04143	0.04143	0.04143	0.1312	0.1312	0.1312	0.1312	0.9351	0.0934	0.8156	0.0649	0.0173	0.255	0.9066	0.9827	0.9761	0.1844	0.745	0.0239	0.2	0.18	TRUE	8.89196
b16b8_080_574	NCU02658.2	1.13573	1	1.36973	1.04933	0.12255	0.11553	0.1381	0.11946	0.13302	0.12633	0.14651	0.12989	0.08157	0.08157	0.08157	0.08157	0.0366	0.0366	0.0366	0.0366	0.12436	0.12436	0.12436	0.12436	0.9399	0.0203	0.8205	0.0601	0.0055	0.247	0.9797	0.9945	0.9949	0.1795	0.753	0.0051	0.18	0.16	TRUE	9.41504
b16b8_300_165	NCU02681.2	1.60154	1	2.54943	1.13133	0.45573	0.31095	0.62166	0.3436	0.50115	0.46258	0.61174	0.4779	0.24334	0.24334	0.24334	0.24334	0.10371	0.10371	0.10371	0.10371	0.28955	0.28955	0.28955	0.28955	0.9699	0.0251	0.901	0.0301	0.0049	0.2867	0.9749	0.9951	0.9952	0.099	0.7133	0.0048	0.39	0.39	TRUE	0.486626
b16d18_030_835	NCU02949.2	1.0868	1	1.1108	1.09701	0.14811	0.13739	0.14429	0.14958	0.15454	0.1465	0.15739	0.16079	0.10501	0.10501	0.10501	0.10501	0.04745	0.04745	0.04745	0.04745	0.14558	0.14558	0.14558	0.14558	0.8106	0.3988	0.4644	0.1894	0.1667	0.1665	0.6012	0.8333	0.5629	0.5356	0.8335	0.4371	0.22	0.2	TRUE	7.44198
b16d18_050_344	NCU02951.2	1.07222	1	1.10151	1.05393	0.17118	0.16752	0.17712	0.17677	0.18812	0.17648	0.18375	0.18708	0.12343	0.12343	0.12343	0.12343	0.05504	0.05504	0.05504	0.05504	0.17984	0.17984	0.17984	0.17984	0.742	0.4001	0.5592	0.258	0.2241	0.3095	0.5999	0.7759	0.6634	0.4408	0.6905	0.3366	0.26	0.23	TRUE	6.41356
b16d18_110_1287	NCU02957.2	1.56205	1	1.34107	1.29992	0.59631	0.37299	0.5516	0.54673	0.58171	0.52341	0.66804	0.63759	0.22417	0.22417	0.22417	0.22417	0.13435	0.13435	0.13435	0.13435	0.58495	0.58495	0.58495	0.58495	0.951	0.7296	0.7424	0.049	0.1762	0.1733	0.2704	0.8238	0.5629	0.2576	0.8267	0.4371	0.46	0.44	TRUE	3.57181
b16d18_180_109	NCU02963.2	1.05833	1	1.07179	1.14293	0.24073	0.25377	0.23715	0.28783	0.25154	0.3142	0.25757	0.31077	0.17014	0.17014	0.17014	0.17014	0.08013	0.08013	0.08013	0.08013	0.26969	0.26969	0.26969	0.26969	0.643	0.4704	0.3391	0.357	0.3501	0.2363	0.5296	0.6499	0.3302	0.6609	0.7637	0.6698	0.35	0.32	TRUE	4.17801
b16m17_060_1071	NCU04099.2	1.06286	1	1.08837	1.02342	0.20669	0.19864	0.21544	0.21088	0.22515	0.22727	0.22883	0.23592	0.15335	0.15335	0.15335	0.15335	0.07007	0.07007	0.07007	0.07007	0.20276	0.20276	0.20276	0.20276	0.6815	0.427	0.5983	0.3185	0.2937	0.4304	0.573	0.7063	0.6768	0.4017	0.5696	0.3232	0.31	0.27	TRUE	5.17882
b17b1_130_555	NCU06852.2	1.17521	1	1.1948	1.03227	0.15956	0.14237	0.16471	0.14185	0.16776	0.15668	0.16964	0.16166	0.10627	0.10627	0.10627	0.10627	0.04706	0.04706	0.04706	0.04706	0.15309	0.15309	0.15309	0.15309	0.9379	0.4283	0.8721	0.0621	0.0705	0.3654	0.5717	0.9295	0.9216	0.1279	0.6346	0.0784	0.23	0.2	TRUE	7.82238
b17c10_160_890	NCU01759.2	1.09216	1	1.18001	1.07496	0.08989	0.08557	0.09535	0.09057	0.09296	0.08855	0.09824	0.09471	0.06043	0.06043	0.06043	0.06043	0.02716	0.02716	0.02716	0.02716	0.09262	0.09262	0.09262	0.09262	0.9327	0.0894	0.6	0.0673	0.0192	0.0998	0.9106	0.9808	0.9379	0.4	0.9002	0.0621	0.35	0.21	TRUE	12.088
b17c10_170_1772	NCU01758.2	1.11212	1	1.02058	1.04684	0.2686	0.24431	0.24929	0.25226	0.28893	0.27453	0.28499	0.3044	0.19794	0.19794	0.19794	0.19794	0.0845	0.0845	0.0845	0.0845	0.24937	0.24937	0.24937	0.24937	0.7375	0.6947	0.6199	0.2625	0.4584	0.3928	0.3053	0.5416	0.4483	0.3801	0.6072	0.5517	0.37	0.33	TRUE	3.13652
b18d24_150_1561	NCU03785.2	1.65753	1	1.53972	1.97105	0.81526	0.47768	0.83739	1.01934	1.01396	0.86251	1.13386	1.24898	0.35882	0.35882	0.35882	0.35882	0.19058	0.19058	0.19058	0.19058	0.72335	0.72335	0.72335	0.72335	0.9174	0.5873	0.3467	0.0826	0.1958	0.0963	0.4127	0.8042	0.2851	0.6533	0.9037	0.7149	0.18	0.19	TRUE	0.877578
b18e6_010_6	NCU09604.2	1.58277	1	1.19352	1.15633	0.40131	0.28904	0.3254	0.35099	0.44077	0.35835	0.37933	0.42273	0.23372	0.23372	0.23372	0.23372	0.09849	0.09849	0.09849	0.09849	0.27989	0.27989	0.27989	0.27989	0.9755	0.9093	0.8931	0.0245	0.2283	0.2574	0.0907	0.7717	0.5702	0.1069	0.7426	0.4298	0.41	0.38	TRUE	-1.18123
b18p24_020_103	NCU03035.2	1.80329	1	1.22781	1.02866	0.46812	0.3335	0.34661	0.33672	0.45585	0.39271	0.40098	0.46524	0.22036	0.22036	0.22036	0.22036	0.10424	0.10424	0.10424	0.10424	0.34956	0.34956	0.34956	0.34956	0.9895	0.9505	0.9683	0.0105	0.2018	0.4523	0.0495	0.7982	0.7979	0.0317	0.5477	0.2021	0.41	0.39	TRUE	0.156813
b19a17_010_585	NCU05121.2	1.516	1	9.96751	1.18085	0.38065	0.28441	1.20693	0.29993	0.62023	0.50773	0.7002	0.48965	0.17929	0.17929	0.17929	0.17929	0.07813	0.07813	0.07813	0.07813	0.25114	0.25114	0.25114	0.25114	0.9789	0	0.9036	0.0211	0	0.1429	1	1	1	0.0964	0.8571	0	0.18	0.31	TRUE	3.05633
b19a17_050_936	NCU05126.2	1.05935	1	1.22986	1.07602	0.234	0.22517	0.28091	0.24395	0.26967	0.27588	0.28996	0.27504	0.17875	0.17875	0.17875	0.17875	0.07863	0.07863	0.07863	0.07863	0.24224	0.24224	0.24224	0.24224	0.6415	0.1782	0.4636	0.3585	0.1413	0.3204	0.8218	0.8587	0.7928	0.5364	0.6796	0.2072	0.34	0.31	TRUE	1.48984
b19a17_060_900	NCU05127.2	2.42734	1	1.15827	1.06314	0.5276	0.25363	0.31056	0.29474	0.47577	0.34173	0.38754	0.38559	0.20668	0.20668	0.20668	0.20668	0.09134	0.09134	0.09134	0.09134	0.2546	0.2546	0.2546	0.2546	0.9984	0.9959	0.9961	0.0016	0.2441	0.3644	0.0041	0.7559	0.6919	0.0039	0.6356	0.3081	0.35	0.34	TRUE	0.0810945
b19a17_220_1876	NCU05145.2	1.1609	1	1.17711	1.04426	0.15407	0.13476	0.17207	0.16503	0.15739	0.14729	0.17898	0.1745	0.08814	0.08814	0.08814	0.08814	0.04385	0.04385	0.04385	0.04385	0.18067	0.18067	0.18067	0.18067	0.9409	0.4285	0.8473	0.0591	0.0718	0.291	0.5715	0.9282	0.8757	0.1527	0.709	0.1243	0.21	0.19	TRUE	8.65125
b19a17_350_866	NCU05158.2	1.1323	1	1.11965	1.00887	0.09009	0.07853	0.09132	0.08516	0.09487	0.08472	0.09094	0.08932	0.05971	0.05971	0.05971	0.05971	0.02707	0.02707	0.02707	0.02707	0.09139	0.09139	0.09139	0.09139	0.9729	0.5865	0.9498	0.0271	0.0512	0.4358	0.4135	0.9488	0.9526	0.0502	0.5642	0.0474	0.47	0.37	TRUE	11.6826
b19a17_360_468	NCU05159.2	21.6026	1	35.5962	1.25694	6.12501	0.40139	7.70868	0.45815	6.86927	1.03158	5.97431	1.1533	0.17736	0.17736	0.17736	0.17736	0.096	0.096	0.096	0.096	0.42107	0.42107	0.42107	0.42107	1	0.0272	0.9999	0	0	0.236	0.9728	1	1	0.0001	0.764	0	0.3	0.36	TRUE	3.68243
b1d1_390_1749	NCU01696.2	1.22535	1	1.32879	1.05236	0.37667	0.34342	0.46228	0.40979	0.41716	0.43477	0.46939	0.5545	0.23525	0.23525	0.23525	0.23525	0.12302	0.12302	0.12302	0.12302	0.44502	0.44502	0.44502	0.44502	0.8195	0.3444	0.7157	0.1805	0.1608	0.4223	0.6556	0.8392	0.805	0.2843	0.5777	0.195	0.46	0.43	TRUE	2.75227
b1d14_200_1988	NCU09209.2	1.10018	1	1.04215	1.10382	0.07093	0.06703	0.0659	0.07033	0.0737	0.06827	0.06968	0.07792	0.04737	0.04737	0.04737	0.04737	0.02152	0.02152	0.02152	0.02152	0.07344	0.07344	0.07344	0.07344	0.9702	0.8871	0.4661	0.0298	0.1942	0.0265	0.1129	0.8058	0.1021	0.5339	0.9735	0.8979	0.31	0.22	TRUE	14.0865
b1d14_240_200	NCU09213.2	1.47296	1	1.9288	1.06798	0.32583	0.25166	0.39645	0.25349	0.37523	0.31025	0.40934	0.32147	0.18993	0.18993	0.18993	0.18993	0.08304	0.08304	0.08304	0.08304	0.2391	0.2391	0.2391	0.2391	0.9754	0.0675	0.9355	0.0246	0.0049	0.3432	0.9325	0.9951	0.9957	0.0645	0.6568	0.0043	0.34	0.32	TRUE	1.54696
b1k11_120_2525	NCU01798.2	1.14494	1	1.2512	1.09314	0.12222	0.10829	0.13263	0.12447	0.13701	0.11826	0.13402	0.12565	0.0797	0.0797	0.0797	0.0797	0.03602	0.03602	0.03602	0.03602	0.12709	0.12709	0.12709	0.12709	0.9496	0.118	0.7196	0.0504	0.0188	0.1204	0.882	0.9812	0.9487	0.2804	0.8796	0.0513	0.17	0.16	TRUE	9.96019
b1k11_160_158	NCU01794.2	1.19618	1	1.57937	1.01508	0.16203	0.13719	0.20403	0.14241	0.17166	0.16057	0.19731	0.15218	0.10081	0.10081	0.10081	0.10081	0.04464	0.04464	0.04464	0.04464	0.15358	0.15358	0.15358	0.15358	0.9588	0.0129	0.9276	0.0412	0.0046	0.43	0.9871	0.9954	0.9979	0.0724	0.57	0.0021	0.21	0.19	TRUE	7.2578
b1o14_110_652	NCU10933.2a	1.17074	1	1.14003	1.21399	0.51183	0.4094	0.67705	0.61122	0.54737	0.49007	0.9835	0.79212	0.28412	0.28412	0.28412	0.28412	0.16007	0.16007	0.16007	0.16007	0.64011	0.64011	0.64011	0.64011	0.7194	0.5314	0.4653	0.2806	0.3885	0.2339	0.4686	0.6115	0.4505	0.5347	0.7661	0.5495	0.33	0.2	TRUE	1.03428
b20j13_050_1117	NCU00954.2	1.1175	1	1.15915	1.03273	0.17993	0.16987	0.18544	0.17385	0.19019	0.18629	0.19472	0.19267	0.12965	0.12965	0.12965	0.12965	0.0583	0.0583	0.0583	0.0583	0.17741	0.17741	0.17741	0.17741	0.8317	0.3678	0.7268	0.1683	0.1348	0.3841	0.6322	0.8652	0.8384	0.2732	0.6159	0.1616	0.27	0.24	TRUE	4.54983
b20j13_150_3349	NCU00964.2	1.2997	1	1.13994	1.09075	0.3337	0.27391	0.31125	0.32376	0.35061	0.30172	0.39124	0.37855	0.19069	0.19069	0.19069	0.19069	0.09275	0.09275	0.09275	0.09275	0.30633	0.30633	0.30633	0.30633	0.9058	0.7699	0.7924	0.0942	0.2643	0.3011	0.2301	0.7357	0.5862	0.2076	0.6989	0.4138	0.38	0.35	TRUE	3.35771
b20j13_230_889	NCU00972.1	3.92948	1	14.999	10.8492	1.16492	0.32397	3.14354	2.60521	1.73035	0.5568	2.51499	3.09995	0.22437	0.22437	0.22437	0.22437	0.09822	0.09822	0.09822	0.09822	0.27388	0.27388	0.27388	0.27388	1	0.0004	0.0021	0	0	0	0.9996	1	0.9344	0.9979	1	0.0656	0.25	0.37	TRUE	1.60407
b21d9_020_1855	NCU01775.2	1.05394	1	1.12337	1.05319	0.24646	0.23519	0.22865	0.21267	0.27492	0.27023	0.24998	0.24136	0.15005	0.15005	0.15005	0.15005	0.0729	0.0729	0.0729	0.0729	0.25552	0.25552	0.25552	0.25552	0.6335	0.3169	0.5012	0.3665	0.2299	0.3374	0.6831	0.7701	0.6801	0.4988	0.6626	0.3199	0.32	0.29	TRUE	5.08568
b21d9_050_2407	NCU01777.2	1.56121	1	1.47927	1.03432	0.28564	0.17685	0.27368	0.1871	0.28681	0.20701	0.29439	0.20492	0.11738	0.11738	0.11738	0.11738	0.05716	0.05716	0.05716	0.05716	0.21401	0.21401	0.21401	0.21401	0.9935	0.6639	0.9862	0.0065	0.0174	0.3776	0.3361	0.9826	0.9878	0.0138	0.6224	0.0122	0.26	0.24	TRUE	6.10042
b21d9_080_1369	NCU01781.2	1.47777	1	1.07448	1.05291	0.15013	0.11236	0.12653	0.12292	0.15052	0.12642	0.12317	0.12525	0.08177	0.08177	0.08177	0.08177	0.0362	0.0362	0.0362	0.0362	0.12324	0.12324	0.12324	0.12324	0.9984	0.9964	0.9959	0.0016	0.2076	0.241	0.0036	0.7924	0.6164	0.0041	0.759	0.3836	0.18	0.16	TRUE	9.26495
b21d9_120_394	b21d9_120	1.3341	1	1.36363	1.13732	0.25635	0.20772	0.30254	0.2651	0.27478	0.24103	0.3125	0.3174	0.14431	0.14431	0.14431	0.14431	0.0701	0.0701	0.0701	0.0701	0.25193	0.25193	0.25193	0.25193	0.961	0.434	0.8296	0.039	0.0522	0.1647	0.566	0.9478	0.8593	0.1704	0.8353	0.1407	0.31	0.28	TRUE	5.25865
b21j21_040_1077	NCU09937.2	1.13892	1	1.59423	1.15402	0.22266	0.20997	0.29604	0.23055	0.25267	0.2407	0.29085	0.26368	0.1568	0.1568	0.1568	0.1568	0.06878	0.06878	0.06878	0.06878	0.21054	0.21054	0.21054	0.21054	0.8269	0.0233	0.4642	0.1731	0.0133	0.1513	0.9767	0.9867	0.9708	0.5358	0.8487	0.0292	0.31	0.28	TRUE	4.78209
b21j21_130_789	NCU09931.2	3.6943	1	2.34943	1.1641	0.40812	0.16023	0.32581	0.19733	0.37807	0.19246	0.35966	0.23279	0.1083	0.1083	0.1083	0.1083	0.04849	0.04849	0.04849	0.04849	0.15743	0.15743	0.15743	0.15743	1	0.9977	1	0	0.0003	0.0695	0.0023	0.9997	0.9994	0	0.9305	0.0006	0.19	0.2	TRUE	7.06726
b22i21_020_1495	NCU00608.2	2.22439	1	1.35821	2.56795	0.34419	0.16951	0.19787	0.36626	0.36703	0.20746	0.20901	0.35283	0.09794	0.09794	0.09794	0.09794	0.04778	0.04778	0.04778	0.04778	0.19382	0.19382	0.19382	0.19382	0.9993	0.9981	0.1119	0.0007	0.0218	0.0001	0.0019	0.9782	0.0004	0.8881	0.9999	0.9996	0.21	0.2	TRUE	8.62737
b22i21_080_1729	NCU00602.2	1.07601	1	1.24255	1.0187	0.17424	0.17157	0.19491	0.17467	0.19527	0.18414	0.20536	0.18516	0.12491	0.12491	0.12491	0.12491	0.05687	0.05687	0.05687	0.05687	0.17961	0.17961	0.17961	0.17961	0.7536	0.1107	0.6591	0.2464	0.0625	0.429	0.8893	0.9375	0.9442	0.3409	0.571	0.0558	0.26	0.23	TRUE	6.31553
b22i21_280_1014	NCU00580.2	1.09196	1	1.1467	1.04565	0.21287	0.19872	0.22461	0.21455	0.23895	0.23136	0.23941	0.24781	0.15596	0.15596	0.15596	0.15596	0.06815	0.06815	0.06815	0.06815	0.22395	0.22395	0.22395	0.22395	0.7387	0.3543	0.6034	0.2613	0.1907	0.3672	0.6457	0.8093	0.7503	0.3966	0.6328	0.2497	0.31	0.28	TRUE	4.96326
b22i21_380_261	NCU00570.2	1.11065	1	1.32305	1.09576	0.21661	0.2059	0.24992	0.22525	0.24773	0.23213	0.26365	0.24573	0.15523	0.15523	0.15523	0.15523	0.0677	0.0677	0.0677	0.0677	0.20792	0.20792	0.20792	0.20792	0.7846	0.1128	0.5333	0.2154	0.0611	0.2516	0.8872	0.9389	0.8969	0.4667	0.7484	0.1031	0.31	0.28	TRUE	4.93342
b22k18_100_2618	NCU09485.2	1.54005	1	1.91892	1.03879	0.2182	0.16169	0.25232	0.1641	0.23001	0.18738	0.24811	0.18171	0.11134	0.11134	0.11134	0.11134	0.05002	0.05002	0.05002	0.05002	0.15581	0.15581	0.15581	0.15581	0.9969	0.0301	0.9929	0.0031	0.0005	0.342	0.9699	0.9995	0.9995	0.0071	0.658	0.0005	0.22	0.21	TRUE	7.33231
b22k18_110_1370	NCU09484.2	1.01831	1	1.05863	1.07099	0.3787	0.39017	0.50212	0.5934	0.39863	0.44006	0.61327	0.81553	0.2349	0.2349	0.2349	0.2349	0.13858	0.13858	0.13858	0.13858	0.59013	0.59013	0.59013	0.59013	0.5282	0.4336	0.4448	0.4718	0.4307	0.4173	0.5664	0.5693	0.4881	0.5552	0.5827	0.5119	0.48	0.46	TRUE	2.90571
b22l22_050_96	NCU05476.2	1.10205	1	1.09987	1.06501	0.16415	0.14933	0.16702	0.15828	0.17063	0.16721	0.16761	0.17604	0.11232	0.11232	0.11232	0.11232	0.05022	0.05022	0.05022	0.05022	0.16683	0.16683	0.16683	0.16683	0.8316	0.5046	0.6153	0.1684	0.2056	0.2559	0.4954	0.7944	0.6295	0.3847	0.7441	0.3705	0.24	0.21	TRUE	6.61395
b23b10_010_3200	NCU05086.2	1.39511	1	1.32731	1.07467	0.51016	0.37335	0.44476	0.35788	0.5596	0.51482	0.48983	0.4612	0.27857	0.27857	0.27857	0.27857	0.12338	0.12338	0.12338	0.12338	0.37523	0.37523	0.37523	0.37523	0.8489	0.5773	0.8017	0.1511	0.1922	0.386	0.4227	0.8078	0.7951	0.1983	0.614	0.2049	0.48	0.45	TRUE	1.26149
b23b10_060_1433	NCU05093.2	1.94005	1	1.80769	1.01327	0.67663	0.38002	0.75708	0.46583	0.51326	0.57558	0.66549	0.81078	0.16814	0.16814	0.16814	0.16814	0.10608	0.10608	0.10608	0.10608	0.467	0.467	0.467	0.467	0.9656	0.683	0.9417	0.0344	0.0672	0.4729	0.317	0.9328	0.9109	0.0583	0.5271	0.0891	0.37	0.37	TRUE	5.74618
b23b10_070_858	NCU05094.2	1.04754	1	1.15406	1.01452	0.13501	0.13136	0.14313	0.13669	0.14642	0.14611	0.14816	0.13909	0.0986	0.0986	0.0986	0.0986	0.04378	0.04378	0.04378	0.04378	0.14394	0.14394	0.14394	0.14394	0.7046	0.1402	0.6327	0.2954	0.091	0.4377	0.8598	0.909	0.9192	0.3673	0.5623	0.0808	0.21	0.19	TRUE	7.26801
b23b10_090_335	NCU05096.2	1.11719	1	1.14063	1.01286	0.19153	0.18019	0.1975	0.17601	0.21495	0.20187	0.20876	0.20456	0.13705	0.13705	0.13705	0.13705	0.05989	0.05989	0.05989	0.05989	0.18653	0.18653	0.18653	0.18653	0.8199	0.4353	0.7641	0.1801	0.1779	0.4626	0.5647	0.8221	0.8334	0.2359	0.5374	0.1666	0.28	0.25	TRUE	5.78955
b23b10_120_750	NCU05099.2	1.20222	1	1.21891	1.04455	0.19322	0.16626	0.19052	0.1748	0.20872	0.19004	0.20104	0.18389	0.126	0.126	0.126	0.126	0.05587	0.05587	0.05587	0.05587	0.18123	0.18123	0.18123	0.18123	0.9278	0.4504	0.8595	0.0722	0.0824	0.3499	0.5496	0.9176	0.9039	0.1405	0.6501	0.0961	0.26	0.23	TRUE	6.55588
b23b10_240_327	NCU05112.2	1.29711	1	1.57884	1.08962	0.38789	0.33099	0.51396	0.40441	0.43045	0.42041	0.55787	0.5238	0.25481	0.25481	0.25481	0.25481	0.11472	0.11472	0.11472	0.11472	0.35103	0.35103	0.35103	0.35103	0.8698	0.1942	0.7351	0.1302	0.0703	0.3589	0.8058	0.9297	0.8873	0.2649	0.6411	0.1127	0.45	0.42	TRUE	-0.446098
b23b10_280_298	NCU05116.2	1.08903	1	1.19145	1.02867	0.10375	0.10329	0.11226	0.09485	0.11042	0.1016	0.11404	0.10898	0.07033	0.07033	0.07033	0.07033	0.03176	0.03176	0.03176	0.03176	0.11	0.11	0.11	0.11	0.9003	0.0877	0.7845	0.0997	0.025	0.3079	0.9123	0.975	0.969	0.2155	0.6921	0.031	0.16	0.37	TRUE	10.7936
b23d6_080_109	NCU06835.2	1.80244	1	1.20284	1.03408	0.16721	0.11195	0.12677	0.11527	0.16731	0.12118	0.13526	0.12492	0.0773	0.0773	0.0773	0.0773	0.03425	0.03425	0.03425	0.03425	0.11319	0.11319	0.11319	0.11319	0.9995	0.9997	0.9996	0.0005	0.0292	0.3046	0.0003	0.9708	0.9645	0.0004	0.6954	0.0355	0.16	0.15	TRUE	9.7567
b23e9_020_1168	NCU03347.2	1.00314	1	1.14086	1.00824	0.12768	0.13592	0.14174	0.13505	0.14565	0.13743	0.15053	0.14094	0.0976	0.0976	0.0976	0.0976	0.04284	0.04284	0.04284	0.04284	0.14062	0.14062	0.14062	0.14062	0.5268	0.0936	0.4849	0.4732	0.106	0.4536	0.9064	0.894	0.9079	0.5151	0.5464	0.0921	0.21	0.18	TRUE	8.25891
b23e9_030_1265	NCU03348.2	1.08934	1	1.08775	1.02026	0.30731	0.28797	0.40665	0.46218	0.29273	0.32623	0.44544	0.57281	0.14043	0.14043	0.14043	0.14043	0.08953	0.08953	0.08953	0.08953	0.46554	0.46554	0.46554	0.46554	0.7428	0.5061	0.6198	0.2572	0.3187	0.454	0.4939	0.6813	0.5964	0.3802	0.546	0.4036	0.36	0.33	TRUE	6.00265
b23e9_040_3785	NCU03350.2	1.36131	1	1.22288	1.14211	0.30409	0.23516	0.27808	0.26754	0.32486	0.27126	0.30362	0.314	0.18465	0.18465	0.18465	0.18465	0.08028	0.08028	0.08028	0.08028	0.23488	0.23488	0.23488	0.23488	0.9545	0.7478	0.8226	0.0455	0.148	0.2018	0.2522	0.852	0.6697	0.1774	0.7982	0.3303	0.35	0.31	TRUE	3.59492
b23g1_010_3096	NCU01847.1	1.17604	1	1.09207	1.05052	0.09884	0.09059	0.09671	0.09502	0.10524	0.09591	0.09676	0.09922	0.06554	0.06554	0.06554	0.06554	0.02983	0.02983	0.02983	0.02983	0.0949	0.0949	0.0949	0.0949	0.985	0.8949	0.9387	0.015	0.109	0.1901	0.1051	0.891	0.7478	0.0613	0.8099	0.2522	0.15	0.36	TRUE	11.5179
b23h20_040_981	NCU03497.2	1.35383	1	1.97684	1.1529	0.31845	0.24833	0.40258	0.28215	0.34798	0.31362	0.40131	0.3418	0.18341	0.18341	0.18341	0.18341	0.07907	0.07907	0.07907	0.07907	0.23847	0.23847	0.23847	0.23847	0.9443	0.0248	0.7978	0.0557	0.0045	0.1918	0.9752	0.9955	0.9923	0.2022	0.8082	0.0077	0.34	0.32	TRUE	2.9557
b23h20_110_1498	NCU03490.2	1.72695	1	1.39418	1.24038	0.50831	0.31716	0.47679	0.442	0.51875	0.40231	0.56451	0.60078	0.24735	0.24735	0.24735	0.24735	0.11493	0.11493	0.11493	0.11493	0.35023	0.35023	0.35023	0.35023	0.9769	0.8327	0.8725	0.0231	0.129	0.1665	0.1673	0.871	0.6703	0.1275	0.8335	0.3297	0.44	0.41	TRUE	1.25807
b23i4_110_4343	NCU03573.2	1.12595	1	1.02948	1.19736	0.4473	0.42148	0.41854	0.57737	0.51094	0.55641	0.59901	0.74223	0.3133	0.3133	0.3133	0.3133	0.15428	0.15428	0.15428	0.15428	0.5078	0.5078	0.5078	0.5078	0.6694	0.6165	0.4377	0.3306	0.4615	0.312	0.3835	0.5385	0.3352	0.5623	0.688	0.6648	0.37	0.23	TRUE	0.498639
b23l21_060_599	NCU03898.2	1.02914	1	1.0172	1.00588	0.19331	0.19046	0.20212	0.1948	0.21254	0.21037	0.21938	0.21675	0.15185	0.15185	0.15185	0.15185	0.06793	0.06793	0.06793	0.06793	0.20979	0.20979	0.20979	0.20979	0.5886	0.536	0.5584	0.4114	0.4562	0.4827	0.464	0.5438	0.5251	0.4416	0.5173	0.4749	0.3	0.27	TRUE	5.18492
b23l21_120_70	NCU03904.2	1.12168	1	1.17861	1.04573	0.20377	0.21847	0.20169	0.21202	0.21542	0.23662	0.22775	0.23365	0.13141	0.13141	0.13141	0.13141	0.06457	0.06457	0.06457	0.06457	0.21781	0.21781	0.21781	0.21781	0.8253	0.324	0.6928	0.1747	0.1353	0.3709	0.676	0.8647	0.8403	0.3072	0.6291	0.1597	0.29	0.26	TRUE	5.61699
b23l21_210_335	NCU03913.2	1.05439	1	1.02364	1.20718	0.37283	0.34735	0.45876	0.63464	0.40176	0.41883	0.53992	0.75513	0.19391	0.19391	0.19391	0.19391	0.1179	0.1179	0.1179	0.1179	0.55958	0.55958	0.55958	0.55958	0.6132	0.5783	0.3271	0.3868	0.4708	0.2424	0.4217	0.5292	0.3214	0.6729	0.7576	0.6786	0.43	0.41	TRUE	3.75119
b23l4_090_508	NCU09260.2	1.00108	1	1.05251	1.02854	0.11176	0.11731	0.11258	0.11952	0.12385	0.11405	0.12981	0.12169	0.08359	0.08359	0.08359	0.08359	0.03766	0.03766	0.03766	0.03766	0.12718	0.12718	0.12718	0.12718	0.5129	0.2482	0.3752	0.4871	0.2771	0.3487	0.7518	0.7229	0.6289	0.6248	0.6513	0.3711	0.18	0.16	TRUE	9.42953
b23l4_110_164	NCU09262.2	1.30249	1	1.31787	1.04186	0.34835	0.28395	0.35539	0.29397	0.38417	0.35666	0.37064	0.36695	0.22461	0.22461	0.22461	0.22461	0.09705	0.09705	0.09705	0.09705	0.29058	0.29058	0.29058	0.29058	0.8916	0.4758	0.8278	0.1084	0.1271	0.4171	0.5242	0.8729	0.8694	0.1722	0.5829	0.1306	0.41	0.37	TRUE	-1.12356
b23l4_130_259	NCU09264.2	1.11171	1	1.0378	1.16274	0.1876	0.1778	0.17447	0.19589	0.20612	0.19116	0.19706	0.20153	0.13374	0.13374	0.13374	0.13374	0.06107	0.06107	0.06107	0.06107	0.18847	0.18847	0.18847	0.18847	0.8131	0.7216	0.3677	0.1869	0.3954	0.1116	0.2784	0.6046	0.1746	0.6323	0.8884	0.8254	0.27	0.25	TRUE	5.79395
b23l4_150_1083	NCU09265.2	1.87472	1	3.31552	1.04476	0.41893	0.26212	0.58465	0.26836	0.47471	0.33308	0.54018	0.34673	0.1796	0.1796	0.1796	0.1796	0.07966	0.07966	0.07966	0.07966	0.2378	0.2378	0.2378	0.2378	0.9975	0.0054	0.9907	0.0025	0	0.377	0.9946	1	0.9999	0.0093	0.623	0.0001	0.29	0.31	TRUE	2.89762
b23n11_080_1518	b23n11_080	1.4051	1	1.12638	1.06717	0.20931	0.15801	0.16942	0.18161	0.21466	0.16914	0.18947	0.18524	0.11563	0.11563	0.11563	0.11563	0.05227	0.05227	0.05227	0.05227	0.1668	0.1668	0.1668	0.1668	0.9914	0.9627	0.9713	0.0086	0.1557	0.2574	0.0373	0.8443	0.7104	0.0287	0.7426	0.2896	0.24	0.22	TRUE	6.58047
b24a11_160_2809	NCU07407.2	1.0808	1	1.14181	1.07898	0.15226	0.14299	0.15347	0.15518	0.15357	0.15391	0.16223	0.16678	0.10502	0.10502	0.10502	0.10502	0.0463	0.0463	0.0463	0.0463	0.15547	0.15547	0.15547	0.15547	0.8027	0.2649	0.5121	0.1973	0.1089	0.2022	0.7351	0.8911	0.7362	0.4879	0.7978	0.2638	0.22	0.2	TRUE	7.74941
b24h17_080_1399	NCU01742.2	1.12831	1	1.20094	1.0072	0.39908	0.32981	0.45942	0.34913	0.41942	0.37435	0.57281	0.45181	0.23618	0.23618	0.23618	0.23618	0.12259	0.12259	0.12259	0.12259	0.4322	0.4322	0.4322	0.4322	0.7125	0.41	0.6653	0.2875	0.2624	0.4731	0.59	0.7376	0.7455	0.3347	0.5269	0.2545	0.45	0.42	TRUE	2.55393
b24h17_130_2967	NCU01737.2	1.11303	1	1.16168	1.03324	0.10938	0.10081	0.11086	0.10549	0.11301	0.10379	0.11405	0.11143	0.07229	0.07229	0.07229	0.07229	0.03216	0.03216	0.03216	0.03216	0.11362	0.11362	0.11362	0.11362	0.932	0.2407	0.8313	0.068	0.039	0.2958	0.7593	0.961	0.9396	0.1687	0.7042	0.0604	0.16	0.36	TRUE	10.5798
b24h17_180_447	NCU01732.2	1.00074	1	1.08736	1.00438	0.16351	0.16357	0.17487	0.15987	0.16826	0.17735	0.19474	0.18243	0.12457	0.12457	0.12457	0.12457	0.05474	0.05474	0.05474	0.05474	0.17643	0.17643	0.17643	0.17643	0.4997	0.2286	0.4948	0.5003	0.2552	0.4856	0.7714	0.7448	0.7647	0.5052	0.5144	0.2353	0.26	0.23	TRUE	6.50194
b24m22_080_593	NCU08718.2	1.39147	1	2.73256	1.29533	0.15801	0.13559	0.43123	0.24666	0.16409	0.17105	0.33172	0.32452	0.05495	0.05495	0.05495	0.05495	0.03123	0.03123	0.03123	0.03123	0.22216	0.22216	0.22216	0.22216	0.9919	0.0034	0.8077	0.0081	0.0013	0.0119	0.9966	0.9987	0.9951	0.1923	0.9881	0.0049	0.35	0.32	TRUE	11.1201
b24m22_170_1813	NCU08708.2	1.05506	1	1.00154	1.14918	0.321	0.34492	0.3153	0.39251	0.37994	0.4065	0.3652	0.48091	0.25392	0.25392	0.25392	0.25392	0.11539	0.11539	0.11539	0.11539	0.3677	0.3677	0.3677	0.3677	0.6068	0.591	0.3789	0.3932	0.4938	0.304	0.409	0.5062	0.2772	0.6211	0.696	0.7228	0.46	0.42	TRUE	1.25318
b24m22_180_689	NCU08707.2	1.02126	1	1.00667	1.00489	0.10218	0.10351	0.10434	0.10719	0.11343	0.11034	0.105	0.10709	0.07556	0.07556	0.07556	0.07556	0.03399	0.03399	0.03399	0.03399	0.11317	0.11317	0.11317	0.11317	0.6301	0.5922	0.5837	0.3699	0.4694	0.4704	0.4078	0.5306	0.5088	0.4163	0.5296	0.4912	0.17	0.4	TRUE	9.76849
b24m22_210_713	NCU08703.2	1.14451	1	1.08236	1.0136	0.2277	0.20006	0.21629	0.20182	0.24346	0.22753	0.2434	0.24244	0.15962	0.15962	0.15962	0.15962	0.06937	0.06937	0.06937	0.06937	0.20847	0.20847	0.20847	0.20847	0.834	0.6552	0.7712	0.166	0.3111	0.4536	0.3448	0.6889	0.6784	0.2288	0.5464	0.3216	0.31	0.28	TRUE	4.66402
b24m22_230_3695	NCU08701.2	1.20339	1	1.24566	1.03836	0.18675	0.16631	0.19636	0.17746	0.20152	0.18431	0.20491	0.18957	0.12542	0.12542	0.12542	0.12542	0.0558	0.0558	0.0558	0.0558	0.1756	0.1756	0.1756	0.1756	0.9354	0.3681	0.8674	0.0646	0.0608	0.3616	0.6319	0.9392	0.9328	0.1326	0.6384	0.0672	0.26	0.23	TRUE	6.23253
b24m22_250_760	NCU08699.2	1.17591	1	1.23535	1.02688	0.20067	0.17968	0.20369	0.18654	0.21311	0.1986	0.21898	0.20421	0.13468	0.13468	0.13468	0.13468	0.05952	0.05952	0.05952	0.05952	0.18351	0.18351	0.18351	0.18351	0.9009	0.3318	0.8335	0.0991	0.077	0.4089	0.6682	0.923	0.925	0.1665	0.5911	0.075	0.28	0.24	TRUE	6.00606
b24n11_040_3846	NCU06756.2	1.08197	1	1.08538	1.08124	0.25468	0.2493	0.27166	0.27249	0.30775	0.29827	0.29096	0.31336	0.20629	0.20629	0.20629	0.20629	0.09093	0.09093	0.09093	0.09093	0.26451	0.26451	0.26451	0.26451	0.6743	0.4937	0.4987	0.3257	0.3465	0.3372	0.5063	0.6535	0.5038	0.5013	0.6628	0.4962	0.38	0.34	TRUE	2.89068
b24n11_050_2400	NCU06754.2	1.1552	1	1.1076	1.03645	0.27482	0.24581	0.26583	0.2628	0.30889	0.28365	0.31194	0.29891	0.20101	0.20101	0.20101	0.20101	0.088	0.088	0.088	0.088	0.256	0.256	0.256	0.256	0.8024	0.6011	0.7111	0.1976	0.3037	0.4148	0.3989	0.6963	0.6459	0.2889	0.5852	0.3541	0.37	0.34	TRUE	3.06399
b24n11_140_915	NCU06746.2	1.08664	1	1.13664	1.00844	0.15181	0.14826	0.14848	0.1456	0.15644	0.14902	0.17072	0.15834	0.10546	0.10546	0.10546	0.10546	0.04785	0.04785	0.04785	0.04785	0.14912	0.14912	0.14912	0.14912	0.8175	0.3103	0.7629	0.1825	0.1206	0.4592	0.6897	0.8794	0.8905	0.2371	0.5408	0.1095	0.23	0.2	TRUE	7.64584
b24n11_150_1566	NCU06745.2	1.22923	1	1.17371	1.04583	0.25871	0.2251	0.25488	0.23505	0.28966	0.25572	0.27975	0.26578	0.17361	0.17361	0.17361	0.17361	0.07465	0.07465	0.07465	0.07465	0.23016	0.23016	0.23016	0.23016	0.9024	0.6154	0.8166	0.0976	0.1896	0.3905	0.3846	0.8104	0.7685	0.1834	0.6095	0.2315	0.34	0.3	TRUE	4.12282
b24n11_160_177	NCU06744.2	2.36725	1	1.53116	2.06403	0.61633	0.29748	0.43358	0.60589	0.67361	0.38334	0.55912	0.65203	0.23809	0.23809	0.23809	0.23809	0.10048	0.10048	0.10048	0.10048	0.28471	0.28471	0.28471	0.28471	0.9984	0.9638	0.714	0.0016	0.0575	0.0053	0.0362	0.9425	0.1018	0.286	0.9947	0.8982	0.39	0.38	TRUE	-0.732681
b24n11_190_756	NCU06742.2	1.0961	1	1.18884	1.18638	0.24382	0.23325	0.27415	0.27556	0.28011	0.26243	0.30092	0.29832	0.18498	0.18498	0.18498	0.18498	0.08079	0.08079	0.08079	0.08079	0.23902	0.23902	0.23902	0.23902	0.7136	0.2995	0.3288	0.2864	0.1826	0.1475	0.7005	0.8174	0.5064	0.6712	0.8525	0.4936	0.35	0.32	TRUE	3.0218
b24n4_060_1565	NCU08738.2	1.36847	1	1.60709	1.07696	0.33102	0.25871	0.41603	0.31811	0.34166	0.32288	0.42917	0.40046	0.18441	0.18441	0.18441	0.18441	0.08945	0.08945	0.08945	0.08945	0.29258	0.29258	0.29258	0.29258	0.9489	0.1711	0.8663	0.0511	0.0328	0.3301	0.8289	0.9672	0.9469	0.1337	0.6699	0.0531	0.37	0.34	TRUE	1.58265
b24n4_140_1091	NCU08746.2	2.04129	1	11.9831	23.8691	0.56739	0.26943	2.43098	3.35637	0.87444	0.41341	2.96964	2.69748	0.17461	0.17461	0.17461	0.17461	0.07761	0.07761	0.07761	0.07761	0.23398	0.23398	0.23398	0.23398	0.998	0	0	0.002	0	0	1	1	0.0011	1	1	0.9989	0.38	0.3	TRUE	2.6209
b24p11_020_1109	NCU01704.2	4.95516	1	3.71475	2.01995	0.68322	0.18626	0.57807	0.3762	0.66463	0.23841	0.57514	0.49506	0.12459	0.12459	0.12459	0.12459	0.05485	0.05485	0.05485	0.05485	0.18359	0.18359	0.18359	0.18359	1	0.9819	0.9996	0	0.0001	0.0005	0.0181	0.9999	0.9987	0.0004	0.9995	0.0013	0.21	0.23	TRUE	6.00815
b24p11_050_1353	NCU01706.2	1.6589	1	1.23742	1.38218	0.73038	0.56578	0.57968	0.88014	0.77582	0.92407	0.71013	1.29371	0.34039	0.34039	0.34039	0.34039	0.17753	0.17753	0.17753	0.17753	0.67868	0.67868	0.67868	0.67868	0.9109	0.8315	0.6501	0.0891	0.312	0.295	0.1685	0.688	0.4015	0.3499	0.705	0.5985	0.38	0.15	TRUE	0.314182
b24p11_090_582	NCU01710.2	1.03634	1	1.08476	1.94516	0.17255	0.15181	0.18551	0.29983	0.19167	0.17126	0.22841	0.27496	0.10332	0.10332	0.10332	0.10332	0.05003	0.05003	0.05003	0.05003	0.19013	0.19013	0.19013	0.19013	0.6459	0.2825	0.0027	0.3541	0.2305	0.0011	0.7175	0.7695	0.0032	0.9973	0.9989	0.9968	0.23	0.21	TRUE	6.46238
b24p7_040_1824	NCU02988.2	1.33913	1	1.04528	1.05603	0.32159	0.25519	0.2567	0.26207	0.34391	0.29898	0.29617	0.30136	0.20393	0.20393	0.20393	0.20393	0.08761	0.08761	0.08761	0.08761	0.257	0.257	0.257	0.257	0.9259	0.909	0.8672	0.0741	0.412	0.3626	0.091	0.588	0.4729	0.1328	0.6374	0.5271	0.38	0.34	TRUE	2.28589
b24p7_320_664	NCU03013.2	3.70554	1	6.0195	1.94509	0.89685	0.27803	1.15452	0.51342	0.97025	0.41412	1.04153	0.74009	0.19409	0.19409	0.19409	0.19409	0.08532	0.08532	0.08532	0.08532	0.259	0.259	0.259	0.259	0.9999	0.0143	0.9903	0.0001	0	0.005	0.9857	1	0.9998	0.0097	0.995	0.0002	0.28	0.33	TRUE	2.41153
b2a19_010_558	NCU03542.2	1.20231	1	1.15109	1.01904	0.3036	0.27532	0.29103	0.26746	0.34407	0.31847	0.32665	0.31588	0.21819	0.21819	0.21819	0.21819	0.0925	0.0925	0.0925	0.0925	0.26152	0.26152	0.26152	0.26152	0.8247	0.5907	0.7698	0.1753	0.2633	0.4621	0.4093	0.7367	0.7413	0.2302	0.5379	0.2587	0.4	0.36	TRUE	2.48012
b2a19_050_2052	NCU03537.2	1.06617	1	1.10884	1.0097	0.17702	0.17371	0.18147	0.18039	0.18739	0.18604	0.21291	0.19142	0.12997	0.12997	0.12997	0.12997	0.05789	0.05789	0.05789	0.05789	0.17905	0.17905	0.17905	0.17905	0.7199	0.3624	0.6635	0.2801	0.216	0.4611	0.6376	0.784	0.7915	0.3365	0.5389	0.2085	0.27	0.24	TRUE	6.2003
b2a19_110_436	NCU03532.2	1.0794	1	1.40318	1.21574	0.27476	0.2701	0.32621	0.28926	0.31122	0.30347	0.37646	0.35996	0.20188	0.20188	0.20188	0.20188	0.08671	0.08671	0.08671	0.08671	0.26489	0.26489	0.26489	0.26489	0.666	0.0797	0.2825	0.334	0.066	0.1481	0.9203	0.934	0.7943	0.7175	0.8519	0.2057	0.37	0.34	TRUE	1.83964
b2a19_140_286	NCU03529.2	1.05565	1	1.13146	1.06249	0.16784	0.16206	0.18165	0.1684	0.17514	0.18415	0.19149	0.186	0.11951	0.11951	0.11951	0.11951	0.05193	0.05193	0.05193	0.05193	0.18129	0.18129	0.18129	0.18129	0.6956	0.2548	0.4806	0.3044	0.165	0.2801	0.7452	0.835	0.7234	0.5194	0.7199	0.2766	0.25	0.22	TRUE	6.68257
b2a19_180_379	NCU03525.2	1.13988	1	1.22099	1.09152	0.12528	0.12111	0.13263	0.12991	0.13794	0.12207	0.14687	0.1277	0.08538	0.08538	0.08538	0.08538	0.03778	0.03778	0.03778	0.03778	0.12919	0.12919	0.12919	0.12919	0.9447	0.1743	0.6954	0.0553	0.0275	0.1313	0.8257	0.9725	0.9179	0.3046	0.8687	0.0821	0.19	0.17	TRUE	9.35973
b2a19_190_3643	NCU03523.2	2.65623	1	2.52419	2.49774	0.63853	0.26988	0.55947	0.62116	0.67091	0.34765	0.63272	0.67905	0.19745	0.19745	0.19745	0.19745	0.08613	0.08613	0.08613	0.08613	0.24304	0.24304	0.24304	0.24304	0.9998	0.62	0.6201	0.0002	0.0008	0.0007	0.38	0.9992	0.5321	0.3799	0.9993	0.4679	0.34	0.33	TRUE	2.6421
b2c16_010_1368	NCU00478.2	1.03866	1	1.07689	1.11281	0.21789	0.2122	0.22781	0.2389	0.24632	0.25622	0.254	0.266	0.17004	0.17004	0.17004	0.17004	0.07601	0.07601	0.07601	0.07601	0.22932	0.22932	0.22932	0.22932	0.6071	0.4082	0.3487	0.3929	0.3321	0.2444	0.5918	0.6679	0.4076	0.6513	0.7556	0.5924	0.33	0.3	TRUE	4.30378
b2c16_060_628	NCU00473.2	1.09215	1	1.08381	1.10555	0.18708	0.16769	0.19432	0.18357	0.20386	0.18945	0.19153	0.21359	0.13552	0.13552	0.13552	0.13552	0.05985	0.05985	0.05985	0.05985	0.18276	0.18276	0.18276	0.18276	0.7742	0.5258	0.4613	0.2258	0.2799	0.1938	0.4742	0.7201	0.4347	0.5387	0.8062	0.5653	0.27	0.24	TRUE	5.27315
b2c22_040_5701	NCU04059.2	1.02471	1	1.01596	1.20026	0.16022	0.15989	0.17587	0.21223	0.17366	0.17285	0.20917	0.22068	0.11162	0.11162	0.11162	0.11162	0.05402	0.05402	0.05402	0.05402	0.19936	0.19936	0.19936	0.19936	0.5998	0.5339	0.1133	0.4002	0.4436	0.0637	0.4661	0.5564	0.1096	0.8867	0.9363	0.8904	0.25	0.23	TRUE	6.73892
b2e7_120_429	NCU08044.2	1.79378	1	2.1697	1.25032	0.24233	0.15554	0.27257	0.19175	0.25684	0.19767	0.26406	0.21215	0.10857	0.10857	0.10857	0.10857	0.04841	0.04841	0.04841	0.04841	0.15513	0.15513	0.15513	0.15513	0.9996	0.0428	0.9908	0.0004	0.0003	0.0315	0.9572	0.9997	0.9988	0.0092	0.9685	0.0012	0.22	0.2	TRUE	7.47123
b2f7_040_745	NCU03659.2	1.15071	1	1.14213	1.05582	0.17886	0.15565	0.18046	0.16911	0.1879	0.1779	0.18349	0.17617	0.11756	0.11756	0.11756	0.11756	0.05157	0.05157	0.05157	0.05157	0.16493	0.16493	0.16493	0.16493	0.8923	0.5305	0.7635	0.1077	0.1492	0.3056	0.4695	0.8508	0.775	0.2365	0.6944	0.225	0.25	0.22	TRUE	5.78232
b2h10_070_2198	NCU07638.2	1.11727	1	1.20394	1.15373	0.26485	0.24416	0.27356	0.27013	0.29613	0.27046	0.30555	0.31548	0.19333	0.19333	0.19333	0.19333	0.08566	0.08566	0.08566	0.08566	0.23854	0.23854	0.23854	0.23854	0.7562	0.3317	0.432	0.2438	0.1728	0.1954	0.6683	0.8272	0.5933	0.568	0.8046	0.4067	0.36	0.33	TRUE	3.4516
b2h10_080_2508	NCU07637.2	1.11805	1	1.42335	1.06737	0.26941	0.25362	0.37079	0.28915	0.29164	0.29579	0.36318	0.35861	0.17504	0.17504	0.17504	0.17504	0.08382	0.08382	0.08382	0.08382	0.29154	0.29154	0.29154	0.29154	0.7577	0.0877	0.6004	0.2423	0.064	0.3321	0.9123	0.936	0.9035	0.3996	0.6679	0.0965	0.35	0.32	TRUE	4.40033
b2h10_130_1677	NCU07632.2	1.03426	1	1.1308	1.03118	0.21981	0.21787	0.24132	0.22334	0.24809	0.24675	0.26452	0.25634	0.16898	0.16898	0.16898	0.16898	0.07433	0.07433	0.07433	0.07433	0.22344	0.22344	0.22344	0.22344	0.5955	0.2668	0.5103	0.4045	0.2389	0.4156	0.7332	0.7611	0.7282	0.4897	0.5844	0.2718	0.33	0.29	TRUE	4.10392
b2h10_150_394	NCU07630.2	1.06261	1	1.18956	1.04801	0.22764	0.22717	0.25832	0.23763	0.26257	0.2549	0.29101	0.25792	0.17831	0.17831	0.17831	0.17831	0.07774	0.07774	0.07774	0.07774	0.23397	0.23397	0.23397	0.23397	0.654	0.2309	0.532	0.346	0.1772	0.3793	0.7691	0.8228	0.7848	0.468	0.6207	0.2152	0.34	0.31	TRUE	3.88093
b2h3_090_557	NCU09421.2	1.50666	1	1.12105	1.0096	0.27734	0.20779	0.20808	0.22301	0.26737	0.22181	0.23467	0.23412	0.09831	0.09831	0.09831	0.09831	0.05436	0.05436	0.05436	0.05436	0.2811	0.2811	0.2811	0.2811	0.983	0.9747	0.9785	0.017	0.1847	0.4463	0.0253	0.8153	0.8085	0.0215	0.5537	0.1915	0.25	0.23	TRUE	7.77756
b2i10_080_8	NCU02046.2	1.91559	1	1.55811	1.25405	0.7098	0.40627	0.63124	0.53709	0.75894	0.60031	0.79798	0.80934	0.34724	0.34724	0.34724	0.34724	0.15089	0.15089	0.15089	0.15089	0.43578	0.43578	0.43578	0.43578	0.9597	0.739	0.8544	0.0403	0.1305	0.2334	0.261	0.8695	0.7246	0.1456	0.7666	0.2754	0.37	0.16	TRUE	-1.7327
b2i10_085_185	NCU02045.2	1.60308	1	1.55919	1.13188	0.37608	0.22892	0.39524	0.26945	0.44741	0.29054	0.38886	0.2953	0.16065	0.16065	0.16065	0.16065	0.07562	0.07562	0.07562	0.07562	0.27556	0.27556	0.27556	0.27556	0.9892	0.5632	0.9502	0.0108	0.0293	0.2096	0.4368	0.9707	0.962	0.0498	0.7904	0.038	0.33	0.31	TRUE	3.77692
b2i10_100_710	NCU02043.2	1.4166	1	1.16168	1.07829	0.61709	0.46154	0.63805	0.70696	0.645	0.60979	0.75387	1.10179	0.33372	0.33372	0.33372	0.33372	0.1797	0.1797	0.1797	0.1797	0.62565	0.62565	0.62565	0.62565	0.8366	0.7617	0.7137	0.1634	0.3662	0.4388	0.2383	0.6338	0.5506	0.2863	0.5612	0.4494	0.17	0.46	TRUE	0.611207
b2j23_200_841	NCU02040.2	1.1064	1	1.26022	1.02891	0.17947	0.16612	0.19635	0.16744	0.19251	0.19421	0.20341	0.18281	0.12552	0.12552	0.12552	0.12552	0.05555	0.05555	0.05555	0.05555	0.18349	0.18349	0.18349	0.18349	0.8119	0.1274	0.7144	0.1881	0.052	0.394	0.8726	0.948	0.9473	0.2856	0.606	0.0527	0.26	0.23	TRUE	6.62752
b2m13_030_2598	NCU09432.2	1.76978	1	1.33778	1.0745	0.47637	0.33543	0.38765	0.35106	0.47465	0.4342	0.43105	0.488	0.23275	0.23275	0.23275	0.23275	0.10839	0.10839	0.10839	0.10839	0.33845	0.33845	0.33845	0.33845	0.9814	0.8997	0.9509	0.0186	0.1414	0.3967	0.1003	0.8586	0.8376	0.0491	0.6033	0.1624	0.43	0.4	TRUE	1.11367
b2m13_060_2501	NCU09435.2	1.26976	1	1.3325	1.48378	0.2561	0.20342	0.30411	0.33472	0.31697	0.22524	0.27922	0.3298	0.06946	0.06946	0.06946	0.06946	0.04659	0.04659	0.04659	0.04659	0.38755	0.38755	0.38755	0.38755	0.9667	0.2693	0.1028	0.0333	0.0474	0.0225	0.7307	0.9526	0.1375	0.8972	0.9775	0.8625	0.23	0.21	TRUE	9.5012
b2m13_100_660	NCU09439.2	1.15903	1	1.12973	1.00972	0.29338	0.26317	0.3005	0.26936	0.33191	0.3088	0.34219	0.32842	0.21943	0.21943	0.21943	0.21943	0.09477	0.09477	0.09477	0.09477	0.27953	0.27953	0.27953	0.27953	0.7769	0.5518	0.7306	0.2231	0.2866	0.4786	0.4482	0.7134	0.7083	0.2694	0.5214	0.2917	0.4	0.36	TRUE	2.39945
b2m13_140_890	NCU09444.2	1.00562	1	1.1017	1.03975	0.15572	0.16244	0.17281	0.16483	0.16849	0.17723	0.17785	0.17736	0.12292	0.12292	0.12292	0.12292	0.05435	0.05435	0.05435	0.05435	0.17845	0.17845	0.17845	0.17845	0.5199	0.1967	0.3943	0.4801	0.2181	0.3526	0.8033	0.7819	0.7052	0.6057	0.6474	0.2948	0.26	0.23	TRUE	6.65868
b2n18_080_526	NCU08024.2	1.13604	1	1.25235	1.04902	0.17354	0.16093	0.19001	0.16777	0.18768	0.18324	0.18731	0.17984	0.11878	0.11878	0.11878	0.11878	0.05384	0.05384	0.05384	0.05384	0.17811	0.17811	0.17811	0.17811	0.8795	0.1835	0.7581	0.1205	0.0551	0.3219	0.8165	0.9449	0.935	0.2419	0.6781	0.065	0.25	0.22	TRUE	6.01667
b2n18_140_511	NCU08018.2	1.09047	1	1.03706	1.00041	0.14748	0.13913	0.14513	0.14659	0.16312	0.1551	0.14908	0.14959	0.10588	0.10588	0.10588	0.10588	0.04712	0.04712	0.04712	0.04712	0.15334	0.15334	0.15334	0.15334	0.8173	0.711	0.7945	0.1827	0.3706	0.5055	0.289	0.6294	0.6568	0.2055	0.4945	0.3432	0.23	0.2	TRUE	6.43492
b2n18_150_211	NCU08017.2	1.91924	1	1.50269	1.05067	0.3877	0.2377	0.32215	0.24844	0.39254	0.2965	0.34771	0.30455	0.1805	0.1805	0.1805	0.1805	0.07771	0.07771	0.07771	0.07771	0.23837	0.23837	0.23837	0.23837	0.9968	0.9229	0.9932	0.0032	0.0313	0.374	0.0771	0.9687	0.9693	0.0068	0.626	0.0307	0.33	0.31	TRUE	3.32662
b2n18_230_1224	NCU08005.2	1.07275	1	1.02235	1.09708	0.21676	0.20481	0.2173	0.22257	0.2421	0.22432	0.23234	0.24956	0.16167	0.16167	0.16167	0.16167	0.07118	0.07118	0.07118	0.07118	0.22196	0.22196	0.22196	0.22196	0.695	0.6368	0.437	0.305	0.4446	0.2519	0.3632	0.5554	0.3073	0.563	0.7481	0.6927	0.32	0.28	TRUE	4.47309
b2n18_280_2902	NCU08000.2	1.03691	1	1.07846	1.02508	0.15113	0.15184	0.15835	0.15215	0.16412	0.16139	0.17323	0.16979	0.1135	0.1135	0.1135	0.1135	0.05038	0.05038	0.05038	0.05038	0.1629	0.1629	0.1629	0.1629	0.6494	0.3461	0.5378	0.3506	0.2579	0.3976	0.6539	0.7421	0.6998	0.4622	0.6024	0.3002	0.24	0.21	TRUE	6.94397
b2o8_190_79	NCU01598.2	1.25966	1	1.26654	1.19705	0.42689	0.34103	0.54578	0.53918	0.45779	0.41712	0.68097	0.67514	0.24045	0.24045	0.24045	0.24045	0.12442	0.12442	0.12442	0.12442	0.43737	0.43737	0.43737	0.43737	0.8215	0.4906	0.5674	0.1785	0.2447	0.2293	0.5094	0.7553	0.56	0.4326	0.7707	0.44	0.46	0.43	TRUE	1.41065
b2o8_310_1165	NCU01580.2	1.11936	1	1.13558	1.03551	0.19709	0.17597	0.19046	0.17153	0.20458	0.19586	0.20084	0.19787	0.1311	0.1311	0.1311	0.1311	0.0584	0.0584	0.0584	0.0584	0.18644	0.18644	0.18644	0.18644	0.8254	0.4367	0.7215	0.1746	0.1723	0.3799	0.5633	0.8277	0.7987	0.2785	0.6201	0.2013	0.27	0.24	TRUE	5.33459
b2o8_360_2480	NCU01572.2	1.16312	1	1.0734	1.04525	0.24936	0.21126	0.23371	0.23354	0.26597	0.24883	0.26777	0.26962	0.17252	0.17252	0.17252	0.17252	0.07527	0.07527	0.07527	0.07527	0.23637	0.23637	0.23637	0.23637	0.8384	0.7126	0.732	0.1616	0.3388	0.3838	0.2874	0.6612	0.5712	0.268	0.6162	0.4288	0.33	0.3	TRUE	4.05331
b2o8_400_851	NCU01568.2	1.10226	1	1.02686	1.09108	0.21941	0.20575	0.20837	0.23259	0.25237	0.22547	0.23699	0.24191	0.16171	0.16171	0.16171	0.16171	0.07005	0.07005	0.07005	0.07005	0.20958	0.20958	0.20958	0.20958	0.765	0.6935	0.531	0.235	0.4398	0.2708	0.3065	0.5602	0.3303	0.469	0.7292	0.6697	0.32	0.28	TRUE	4.46199
b2o8_430_2229	NCU01565.2	1.21065	1	1.12395	1.01981	0.13514	0.11725	0.13291	0.12467	0.14517	0.13203	0.13834	0.12433	0.08356	0.08356	0.08356	0.08356	0.03726	0.03726	0.03726	0.03726	0.12878	0.12878	0.12878	0.12878	0.9773	0.8377	0.9556	0.0227	0.1043	0.3925	0.1623	0.8957	0.8868	0.0444	0.6075	0.1132	0.19	0.16	TRUE	9.59304
b3e4_080_640	NCU09611.2	1.06429	1	1.07162	1.01842	0.12917	0.13222	0.1332	0.12587	0.13728	0.13807	0.14353	0.13558	0.09141	0.09141	0.09141	0.09141	0.04187	0.04187	0.04187	0.04187	0.13958	0.13958	0.13958	0.13958	0.7787	0.4651	0.6807	0.2213	0.2304	0.4091	0.5349	0.7696	0.7355	0.3193	0.5909	0.2645	0.2	0.18	TRUE	8.98664
b3e4_120_1444	NCU09615.2	1.16092	1	1.38003	1.0778	0.20355	0.18761	0.27211	0.22318	0.215	0.21296	0.27211	0.26357	0.12825	0.12825	0.12825	0.12825	0.0617	0.0617	0.0617	0.0617	0.22971	0.22971	0.22971	0.22971	0.8887	0.0884	0.7078	0.1113	0.0359	0.262	0.9116	0.9641	0.9323	0.2922	0.738	0.0677	0.28	0.25	TRUE	5.14292
b3e4_230_1135	NCU09625.2	1.16287	1	1.14996	1.0172	0.07801	0.05922	0.07582	0.06209	0.07932	0.06239	0.07597	0.06201	0.03795	0.03795	0.03795	0.03795	0.01854	0.01854	0.01854	0.01854	0.08532	0.08532	0.08532	0.08532	0.9922	0.6115	0.9829	0.0078	0.0158	0.3056	0.3885	0.9842	0.9874	0.0171	0.6944	0.0126	0.23	0.34	TRUE	14.1141
b3e4_250_446	NCU09627.2	1.20406	1	1.13997	1.05086	0.10331	0.09268	0.09699	0.10246	0.10629	0.09292	0.1048	0.0978	0.06498	0.06498	0.06498	0.06498	0.02906	0.02906	0.02906	0.02906	0.10159	0.10159	0.10159	0.10159	0.9906	0.8193	0.9611	0.0094	0.0418	0.1896	0.1807	0.9582	0.9088	0.0389	0.8104	0.0912	0.19	0.41	TRUE	11.4769
b4b2_040_3226	NCU08879.2	1.16137	1	1.1258	1.3156	0.14974	0.14168	0.13168	0.18884	0.15066	0.1563	0.14198	0.18686	0.03736	0.03736	0.03736	0.03736	0.02536	0.02536	0.02536	0.02536	0.24386	0.24386	0.24386	0.24386	0.9549	0.792	0.0656	0.0451	0.069	0.018	0.208	0.931	0.043	0.9344	0.982	0.957	0.24	0.21	TRUE	13.6781
b5k2_030_2625	NCU02583.2	1.79457	1	1.79934	4.21538	0.52955	0.28389	0.49388	0.95466	0.70279	0.42406	0.61678	0.81245	0.2176	0.2176	0.2176	0.2176	0.09377	0.09377	0.09377	0.09377	0.27654	0.27654	0.27654	0.27654	0.9904	0.4907	0.0047	0.0096	0.0171	0.0003	0.5093	0.9829	0.0022	0.9953	0.9997	0.9978	0.33	0.36	TRUE	1.87967
b5k2_210_1295	NCU02564.2	1.1932	1	1.04808	1.02575	0.29659	0.26432	0.27643	0.27779	0.33945	0.31128	0.31937	0.32644	0.21903	0.21903	0.21903	0.21903	0.09329	0.09329	0.09329	0.09329	0.27733	0.27733	0.27733	0.27733	0.8297	0.7487	0.7569	0.1703	0.4178	0.4546	0.2513	0.5822	0.5474	0.2431	0.5454	0.4526	0.4	0.36	TRUE	2.18113
b5o22_010_682	NCU01521.2	1.04159	1	1.12654	1.01801	0.05823	0.05793	0.06062	0.05887	0.06206	0.05807	0.06209	0.05915	0.03956	0.03956	0.03956	0.03956	0.01759	0.01759	0.01759	0.01759	0.06752	0.06752	0.06752	0.06752	0.8678	0.0332	0.7172	0.1322	0.016	0.3057	0.9668	0.984	0.9826	0.2828	0.6943	0.0174	0.3	0.26	TRUE	15.3771
b5o22_160_74	b5o22_160	1.22613	1	1.22901	1.70567	0.33603	0.27329	0.45206	0.61975	0.38866	0.31147	0.60985	0.61748	0.1709	0.1709	0.1709	0.1709	0.09082	0.09082	0.09082	0.09082	0.36623	0.36623	0.36623	0.36623	0.8692	0.5069	0.1174	0.1308	0.2071	0.0189	0.4931	0.7929	0.1467	0.8826	0.9811	0.8533	0.37	0.34	TRUE	4.29237
b5o22_200_720	NCU01505.2	1.34023	1	1.19603	1.03819	0.27938	0.20136	0.25468	0.20786	0.29817	0.21318	0.27911	0.22449	0.13371	0.13371	0.13371	0.13371	0.06415	0.06415	0.06415	0.06415	0.24855	0.24855	0.24855	0.24855	0.9704	0.7749	0.9312	0.0296	0.1249	0.3747	0.2251	0.8751	0.8616	0.0688	0.6253	0.1384	0.29	0.26	TRUE	4.84032
b7f18_050_521	NCU02969.2	1.03993	1	1.06531	1.07828	0.21731	0.21698	0.2381	0.23606	0.24987	0.24849	0.26595	0.25331	0.17022	0.17022	0.17022	0.17022	0.07393	0.07393	0.07393	0.07393	0.2272	0.2272	0.2272	0.2272	0.6098	0.4343	0.4227	0.3902	0.3582	0.3043	0.5657	0.6418	0.4658	0.5773	0.6957	0.5342	0.34	0.3	TRUE	4.17116
b7f18_120_3306	NCU02976.2	1.22113	1	1.21897	1.00715	0.24385	0.20371	0.2639	0.23462	0.24822	0.23351	0.28137	0.27929	0.14497	0.14497	0.14497	0.14497	0.07031	0.07031	0.07031	0.07031	0.25817	0.25817	0.25817	0.25817	0.9151	0.5059	0.8706	0.0849	0.1207	0.4796	0.4941	0.8793	0.8794	0.1294	0.5204	0.1206	0.31	0.28	TRUE	5.4379
b7f21_030_462	NCU05418.2	1.08	1	1.28209	1.16779	0.23658	0.24494	0.26735	0.28258	0.27465	0.30203	0.28038	0.30406	0.16115	0.16115	0.16115	0.16115	0.07857	0.07857	0.07857	0.07857	0.26837	0.26837	0.26837	0.26837	0.7075	0.1292	0.3249	0.2925	0.0998	0.2025	0.8708	0.9002	0.7435	0.6751	0.7975	0.2565	0.34	0.31	TRUE	3.56418
b7f21_050_595	NCU05417.2	1.12236	1	1.07596	1.0237	0.14154	0.12432	0.13855	0.13621	0.14632	0.13344	0.1429	0.13913	0.09509	0.09509	0.09509	0.09509	0.04264	0.04264	0.04264	0.04264	0.13875	0.13875	0.13875	0.13875	0.9012	0.6935	0.8228	0.0988	0.2311	0.3875	0.3065	0.7689	0.7174	0.1772	0.6125	0.2826	0.21	0.18	TRUE	8.46131
b7h23_110_359	NCU04308.2	1.06547	1	1.08442	1.08939	0.26778	0.2608	0.27886	0.28852	0.30778	0.31127	0.31373	0.32893	0.21704	0.21704	0.21704	0.21704	0.09425	0.09425	0.09425	0.09425	0.25942	0.25942	0.25942	0.25942	0.6376	0.4636	0.4625	0.3624	0.3481	0.3278	0.5364	0.6519	0.4962	0.5375	0.6722	0.5038	0.39	0.36	TRUE	2.32808
b7h23_150_1157	NCU04312.2	1.07236	1	1.06208	1.03034	0.19136	0.18216	0.19014	0.18658	0.20109	0.20416	0.20958	0.2122	0.14272	0.14272	0.14272	0.14272	0.06319	0.06319	0.06319	0.06319	0.19475	0.19475	0.19475	0.19475	0.7139	0.5324	0.6166	0.2861	0.3323	0.406	0.4676	0.6677	0.6047	0.3834	0.594	0.3953	0.29	0.26	TRUE	5.61483
b7h23_190_1691	NCU04316.2	1.3229	1	1.46754	1.17477	0.29546	0.23306	0.31716	0.2798	0.31868	0.28554	0.31516	0.31865	0.18125	0.18125	0.18125	0.18125	0.08064	0.08064	0.08064	0.08064	0.24979	0.24979	0.24979	0.24979	0.9411	0.2582	0.7394	0.0589	0.0408	0.1709	0.7418	0.9592	0.9011	0.2606	0.8291	0.0989	0.34	0.31	TRUE	3.9303
b7h23_250_834	NCU04322.2	1.47589	1	1.18132	1.06609	0.25	0.19154	0.21244	0.20258	0.26471	0.21385	0.22438	0.22429	0.14157	0.14157	0.14157	0.14157	0.06238	0.06238	0.06238	0.06238	0.20311	0.20311	0.20311	0.20311	0.9885	0.9524	0.9717	0.0115	0.1362	0.3039	0.0476	0.8638	0.7953	0.0283	0.6961	0.2047	0.29	0.25	TRUE	4.64769
b7h23_270_786	NCU04324.2	1.04718	1	1.14926	1.10176	0.22174	0.22561	0.24192	0.2467	0.26609	0.25416	0.27174	0.26354	0.17443	0.17443	0.17443	0.17443	0.07606	0.07606	0.07606	0.07606	0.23521	0.23521	0.23521	0.23521	0.6231	0.2727	0.388	0.3769	0.2196	0.264	0.7273	0.7804	0.6097	0.612	0.736	0.3903	0.34	0.3	TRUE	3.89684
b7h23_280_1706	NCU04325.2	1.44335	1	1.34791	1.24542	0.37616	0.26888	0.39595	0.36849	0.40508	0.3455	0.41441	0.46923	0.20372	0.20372	0.20372	0.20372	0.09656	0.09656	0.09656	0.09656	0.30922	0.30922	0.30922	0.30922	0.9532	0.6604	0.7401	0.0468	0.1146	0.1343	0.3396	0.8854	0.64	0.2599	0.8657	0.36	0.4	0.36	TRUE	2.78458
b7h23_300_2311	NCU04327.2	1.04239	1	1.1064	1.03589	0.1497	0.13966	0.15537	0.14239	0.158	0.15446	0.1582	0.15362	0.10614	0.10614	0.10614	0.10614	0.0464	0.0464	0.0464	0.0464	0.15213	0.15213	0.15213	0.15213	0.6768	0.253	0.5199	0.3232	0.1794	0.3459	0.747	0.8206	0.7504	0.4801	0.6541	0.2496	0.23	0.2	TRUE	6.38631
b7j19_010_1530	NCU05460.2	1.30497	1	1.22412	1.24673	0.3161	0.27235	0.29538	0.33855	0.34452	0.34447	0.31298	0.38153	0.1764	0.1764	0.1764	0.1764	0.08452	0.08452	0.08452	0.08452	0.28709	0.28709	0.28709	0.28709	0.9259	0.6704	0.5976	0.0741	0.1664	0.1411	0.3296	0.8336	0.461	0.4024	0.8589	0.539	0.36	0.32	TRUE	2.75729
b7j19_080_12	NCU05468.2	1.12759	1	1.26131	1.0168	0.27737	0.25688	0.34847	0.27409	0.30328	0.30007	0.36641	0.3627	0.18783	0.18783	0.18783	0.18783	0.08946	0.08946	0.08946	0.08946	0.29418	0.29418	0.29418	0.29418	0.7602	0.2544	0.6919	0.2398	0.1508	0.4637	0.7456	0.8492	0.8384	0.3081	0.5363	0.1616	0.37	0.34	TRUE	3.83682
b7n14_230_1550	NCU03548.2	1.07623	1	1.208	1.05364	0.11072	0.10362	0.12357	0.10532	0.11691	0.10826	0.12057	0.11062	0.07336	0.07336	0.07336	0.07336	0.03294	0.03294	0.03294	0.03294	0.11607	0.11607	0.11607	0.11607	0.8574	0.0592	0.6129	0.1426	0.0233	0.2089	0.9408	0.9767	0.9602	0.3871	0.7911	0.0398	0.16	0.34	TRUE	10.0564
b7n14_240_4	NCU03547.2	1.13431	1	1.14276	1.00265	0.16783	0.14492	0.16728	0.15623	0.18197	0.16859	0.17716	0.16581	0.11533	0.11533	0.11533	0.11533	0.05137	0.05137	0.05137	0.05137	0.15889	0.15889	0.15889	0.15889	0.8843	0.466	0.8514	0.1157	0.1301	0.4941	0.534	0.8699	0.8894	0.1486	0.5059	0.1106	0.24	0.21	TRUE	6.96693
b7n14_260_6652	NCU03545.2	1.12936	1	1.06551	1.00731	0.18765	0.17636	0.18144	0.16889	0.20253	0.18862	0.19751	0.19923	0.13188	0.13188	0.13188	0.13188	0.05863	0.05863	0.05863	0.05863	0.18275	0.18275	0.18275	0.18275	0.8465	0.7012	0.804	0.1535	0.3102	0.4755	0.2988	0.6898	0.6855	0.196	0.5245	0.3145	0.27	0.24	TRUE	6.18951
b7n14_280_672	NCU03543.2	1.22176	1	1.16883	1.02214	0.18677	0.1551	0.1741	0.16567	0.19585	0.17826	0.18679	0.17932	0.11953	0.11953	0.11953	0.11953	0.05227	0.05227	0.05227	0.05227	0.16319	0.16319	0.16319	0.16319	0.9541	0.6685	0.9122	0.0459	0.1122	0.4248	0.3315	0.8878	0.8904	0.0878	0.5752	0.1096	0.25	0.22	TRUE	7.02196
b7o17_010_1135	NCU01389.2	1.19596	1	1.11826	1.00127	0.14726	0.13173	0.13757	0.12661	0.14671	0.13497	0.13804	0.1439	0.09183	0.09183	0.09183	0.09183	0.04118	0.04118	0.04118	0.04118	0.14357	0.14357	0.14357	0.14357	0.9661	0.7863	0.9465	0.0339	0.1291	0.4895	0.2137	0.8709	0.8986	0.0535	0.5105	0.1014	0.2	0.18	TRUE	9.00985
b8b20_350_1408	NCU05427.2	1.09794	1	1.11688	1.06174	0.15357	0.14118	0.15747	0.1504	0.1628	0.15261	0.16935	0.16572	0.10939	0.10939	0.10939	0.10939	0.04852	0.04852	0.04852	0.04852	0.15217	0.15217	0.15217	0.15217	0.8334	0.4269	0.6315	0.1666	0.1663	0.2665	0.5731	0.8337	0.7085	0.3685	0.7335	0.2915	0.23	0.21	TRUE	7.52938
b8g12_010_264	NCU07225.2	15.2662	1	33.0108	1.41015	6.72184	0.54554	9.492	0.74212	8.47611	1.4208	7.32183	2.81788	0.4328	0.4328	0.4328	0.4328	0.1771	0.1771	0.1771	0.1771	0.46098	0.46098	0.46098	0.46098	1	0.0251	1	0	0	0.18	0.9749	1	1	0	0.82	0	0.24	0.21	TRUE	-5.98928
b8g12_020_1274	NCU07224.2	1.06198	1	1.10951	1.02284	0.17335	0.1585	0.17788	0.15889	0.18227	0.17403	0.1766	0.17891	0.1176	0.1176	0.1176	0.1176	0.05301	0.05301	0.05301	0.05301	0.17844	0.17844	0.17844	0.17844	0.7134	0.3262	0.63	0.2866	0.1968	0.4104	0.6738	0.8032	0.784	0.37	0.5896	0.216	0.25	0.22	TRUE	5.79385
b8g12_050_98	NCU07220.2	1.15726	1	1.20785	1.53672	0.42858	0.4927	0.45749	0.83841	0.51523	0.68424	0.53213	0.94245	0.23287	0.23287	0.23287	0.23287	0.13513	0.13513	0.13513	0.13513	0.59035	0.59035	0.59035	0.59035	0.7499	0.4046	0.2306	0.2501	0.261	0.1745	0.5954	0.739	0.2266	0.7694	0.8255	0.7734	0.47	0.46	TRUE	3.22577
b8g12_070_98	NCU07217.2	1.52844	1	2.3893	1.18875	0.65641	0.49518	1.40297	0.79772	0.84989	0.87082	1.32295	1.62498	0.38801	0.38801	0.38801	0.38801	0.20198	0.20198	0.20198	0.20198	0.73	0.73	0.73	0.73	0.8799	0.1641	0.6791	0.1201	0.0787	0.36	0.8359	0.9213	0.8264	0.3209	0.64	0.1736	0.16	0.21	TRUE	-0.437117
b8g12_100_1446	NCU07214.2	1.51443	1	1.23197	1.01026	0.26732	0.18822	0.26133	0.21268	0.264	0.21146	0.27059	0.27985	0.13257	0.13257	0.13257	0.13257	0.06336	0.06336	0.06336	0.06336	0.23498	0.23498	0.23498	0.23498	0.9891	0.9364	0.9754	0.0109	0.0973	0.4601	0.0636	0.9027	0.886	0.0246	0.5399	0.114	0.28	0.26	TRUE	5.87833
b8g12_125_1041	NCU07211.2	1.10044	1	1.04912	1.14865	0.26002	0.23221	0.2463	0.25983	0.3017	0.26615	0.26989	0.2942	0.18975	0.18975	0.18975	0.18975	0.08183	0.08183	0.08183	0.08183	0.2493	0.2493	0.2493	0.2493	0.725	0.6179	0.4096	0.275	0.3968	0.1989	0.3821	0.6032	0.2893	0.5904	0.8011	0.7107	0.36	0.32	TRUE	3.35857
b8g12_140_46	NCU07208.2	1.39193	1	1.32523	1.21176	0.46062	0.32358	0.55162	0.58816	0.43141	0.39064	0.58469	0.80738	0.16646	0.16646	0.16646	0.16646	0.1019	0.1019	0.1019	0.1019	0.50134	0.50134	0.50134	0.50134	0.9393	0.6297	0.7	0.0607	0.1383	0.2076	0.3703	0.8617	0.6151	0.3	0.7924	0.3849	0.4	0.37	TRUE	4.95193
b8g12_160_1962	NCU07206.2	1.12432	1	1.20477	1.0489	0.22623	0.2158	0.24149	0.20942	0.24278	0.24955	0.25744	0.25647	0.1646	0.1646	0.1646	0.1646	0.07144	0.07144	0.07144	0.07144	0.21001	0.21001	0.21001	0.21001	0.7958	0.3153	0.6607	0.2042	0.1429	0.3687	0.6847	0.8571	0.8271	0.3393	0.6313	0.1729	0.32	0.29	TRUE	4.52663
b8g12_320_388	NCU07190.2	94.7717	1	271.708	1.90958	24.5242	0.38912	40.608	0.64659	39.8006	1.14013	24.4558	1.43749	0.17641	0.17641	0.17641	0.17641	0.09468	0.09468	0.09468	0.09468	0.40735	0.40735	0.40735	0.40735	1	0.0001	1	0	0	0.0519	0.9999	1	1	0	0.9481	0	0.21	0.35	TRUE	2.98554
b8g12_410_1006	NCU07181.2	1.06752	1	1.13001	1.02396	0.14209	0.13859	0.15913	0.14205	0.15341	0.1514	0.15244	0.15148	0.10402	0.10402	0.10402	0.10402	0.04671	0.04671	0.04671	0.04671	0.14166	0.14166	0.14166	0.14166	0.7693	0.2671	0.6459	0.2307	0.1415	0.3915	0.7329	0.8585	0.8439	0.3541	0.6085	0.1561	0.22	0.19	TRUE	7.63965
b8i24_130_2713	NCU04738.2	1.11214	1	1.12616	1.00057	0.05831	0.05233	0.06242	0.05692	0.0623	0.05773	0.06029	0.05405	0.03784	0.03784	0.03784	0.03784	0.01694	0.01694	0.01694	0.01694	0.06243	0.06243	0.06243	0.06243	0.9876	0.3595	0.983	0.0124	0.0164	0.4991	0.6405	0.9836	0.9916	0.017	0.5009	0.0084	0.24	0.23	TRUE	15.7792
b8i24_150_657	NCU04741.2	1.11966	1	1.19992	1.01296	0.20256	0.1754	0.21195	0.18624	0.21446	0.20501	0.22468	0.20935	0.1385	0.1385	0.1385	0.1385	0.06036	0.06036	0.06036	0.06036	0.19722	0.19722	0.19722	0.19722	0.8136	0.2765	0.7601	0.1864	0.1056	0.4507	0.7235	0.8944	0.9006	0.2399	0.5493	0.0994	0.28	0.25	TRUE	5.74559
b8j22_030_634	NCU09231.2	1.17708	1	1.01088	1.01371	0.25127	0.22848	0.2333	0.24928	0.29355	0.26518	0.27347	0.27231	0.18724	0.18724	0.18724	0.18724	0.08326	0.08326	0.08326	0.08326	0.24097	0.24097	0.24097	0.24097	0.8394	0.8249	0.788	0.1606	0.4777	0.4708	0.1751	0.5223	0.4926	0.212	0.5292	0.5074	0.36	0.32	TRUE	3.24713
b8j22_080_822	NCU09236.2	1.18603	1	1.18434	1.01122	0.29752	0.26195	0.30908	0.28131	0.34209	0.32754	0.34626	0.3249	0.22368	0.22368	0.22368	0.22368	0.09603	0.09603	0.09603	0.09603	0.26745	0.26745	0.26745	0.26745	0.8082	0.5016	0.7609	0.1918	0.2322	0.4737	0.4984	0.7678	0.7762	0.2391	0.5263	0.2238	0.4	0.36	TRUE	-1.00732
b8j22_120_1235	b8j22_120	1.13505	1	1.01223	1.16157	0.2658	0.22469	0.24759	0.28297	0.2687	0.24163	0.29527	0.33542	0.16792	0.16792	0.16792	0.16792	0.0801	0.0801	0.0801	0.0801	0.26028	0.26028	0.26028	0.26028	0.7886	0.7816	0.4497	0.2114	0.4759	0.1584	0.2184	0.5241	0.2235	0.5503	0.8416	0.7765	0.35	0.31	TRUE	4.32834
b8j22_150_2542	NCU09241.2	1.12544	1	1.19071	1.05639	0.12524	0.12145	0.13773	0.12505	0.1361	0.129	0.13979	0.13097	0.08528	0.08528	0.08528	0.08528	0.03857	0.03857	0.03857	0.03857	0.12558	0.12558	0.12558	0.12558	0.9205	0.2291	0.7687	0.0795	0.0451	0.2325	0.7709	0.9549	0.9243	0.2313	0.7675	0.0757	0.19	0.17	TRUE	9.15991
b8j24_070_2301	NCU03461.2	1.07534	1	1.12052	1.02061	0.20131	0.19168	0.21238	0.20007	0.23216	0.20941	0.22568	0.22323	0.14858	0.14858	0.14858	0.14858	0.06509	0.06509	0.06509	0.06509	0.20359	0.20359	0.20359	0.20359	0.7167	0.3772	0.6385	0.2833	0.2245	0.4406	0.6228	0.7755	0.7592	0.3615	0.5594	0.2408	0.3	0.27	TRUE	5.08161
b8j24_120_506	NCU03464.2	1.08338	1	1.0778	1.07169	0.17593	0.16665	0.17308	0.17722	0.19315	0.18185	0.19552	0.18606	0.12672	0.12672	0.12672	0.12672	0.05553	0.05553	0.05553	0.05553	0.17449	0.17449	0.17449	0.17449	0.7664	0.5235	0.532	0.2336	0.2774	0.2634	0.4765	0.7226	0.5243	0.468	0.7366	0.4757	0.27	0.23	TRUE	6.34221
b8l21_010_2217	b8l21_010	1.57802	1	2.08555	1.26689	0.37491	0.25161	0.45624	0.30702	0.42159	0.32443	0.42813	0.36741	0.1929	0.1929	0.1929	0.1929	0.08533	0.08533	0.08533	0.08533	0.2359	0.2359	0.2359	0.2359	0.9821	0.0697	0.8588	0.0179	0.0039	0.094	0.9303	0.9961	0.9888	0.1412	0.906	0.0112	0.35	0.33	TRUE	2.63445
b8l21_150_1195	NCU03482.2	1.54964	1	2.12071	1.20104	0.60146	0.45371	0.90577	0.60595	0.75624	0.67844	1.02888	0.81236	0.36159	0.36159	0.36159	0.36159	0.15857	0.15857	0.15857	0.15857	0.4452	0.4452	0.4452	0.4452	0.8904	0.1718	0.7393	0.1096	0.0547	0.3093	0.8282	0.9453	0.905	0.2607	0.6907	0.095	0.31	0.21	TRUE	-2.80973
b8l3_120_340	NCU04267.2	1.11146	1	1.20642	1.02199	0.10026	0.09035	0.10682	0.09481	0.1044	0.10142	0.10592	0.09541	0.06521	0.06521	0.06521	0.06521	0.02911	0.02911	0.02911	0.02911	0.0992	0.0992	0.0992	0.0992	0.9408	0.0986	0.8865	0.0592	0.0191	0.3552	0.9014	0.9809	0.9847	0.1135	0.6448	0.0153	0.39	0.37	TRUE	11.0449
b8p8_010_919	NCU01427.2	2.7558	1	1.7082	1.00032	0.53717	0.24588	0.41054	0.27821	0.46028	0.32417	0.44201	0.43419	0.16384	0.16384	0.16384	0.16384	0.07952	0.07952	0.07952	0.07952	0.28436	0.28436	0.28436	0.28436	0.9989	0.9879	0.9983	0.0011	0.0188	0.4859	0.0121	0.9812	0.9779	0.0017	0.5141	0.0221	0.3	0.31	TRUE	4.70579
b8p8_110_1876	NCU01417.2	3.26522	1	2.66465	1.34178	1.32655	0.54942	1.07144	0.70148	1.2849	1.12917	1.17036	1.15811	0.37995	0.37995	0.37995	0.37995	0.18532	0.18532	0.18532	0.18532	0.57229	0.57229	0.57229	0.57229	0.984	0.7476	0.9586	0.016	0.0368	0.2412	0.2524	0.9632	0.9487	0.0414	0.7588	0.0513	0.2	0.28	TRUE	-2.95956
b8p8_200_1623	NCU01411.2	1.03673	1	1.14986	1.02427	0.20003	0.20233	0.21146	0.19496	0.22065	0.22324	0.23489	0.22071	0.1547	0.1547	0.1547	0.1547	0.06839	0.06839	0.06839	0.06839	0.19867	0.19867	0.19867	0.19867	0.6056	0.219	0.5283	0.3944	0.1909	0.427	0.781	0.8091	0.8038	0.4717	0.573	0.1962	0.31	0.27	TRUE	4.09526
b9b11_020_828	NCU03361.2	1.08781	1	1.09275	1.0066	0.17982	0.17505	0.17667	0.17782	0.19737	0.17861	0.19725	0.18212	0.13114	0.13114	0.13114	0.13114	0.05864	0.05864	0.05864	0.05864	0.18666	0.18666	0.18666	0.18666	0.7751	0.4852	0.7244	0.2249	0.2479	0.4756	0.5148	0.7521	0.766	0.2756	0.5244	0.234	0.27	0.24	TRUE	6.16291
b9b11_050_1715	NCU03364.2	3.77353	1	3.63	1.13529	1.05087	0.38078	1.01284	0.42578	1.02526	0.57966	1.05831	0.6958	0.29007	0.29007	0.29007	0.29007	0.12092	0.12092	0.12092	0.12092	0.33876	0.33876	0.33876	0.33876	0.9999	0.5661	0.9986	0.0001	0.0006	0.3173	0.4339	0.9994	0.9981	0.0014	0.6827	0.0019	0.39	0.44	TRUE	-0.684134
b9b11_160_837	NCU03375.2	1.02689	1	1.07073	1.05859	0.08493	0.08614	0.08586	0.08798	0.08957	0.08263	0.0913	0.08729	0.06013	0.06013	0.06013	0.06013	0.02697	0.02697	0.02697	0.02697	0.09021	0.09021	0.09021	0.09021	0.6967	0.2098	0.3025	0.3033	0.1338	0.1493	0.7902	0.8662	0.5945	0.6975	0.8507	0.4055	0.37	0.41	TRUE	11.8978
b9b11_190_5269	NCU03379.2	1.00606	1	1.12525	1.01262	0.27017	0.30214	0.3001	0.29867	0.29176	0.3445	0.32599	0.36459	0.20725	0.20725	0.20725	0.20725	0.09683	0.09683	0.09683	0.09683	0.31287	0.31287	0.31287	0.31287	0.5242	0.2721	0.4949	0.4758	0.297	0.4804	0.7279	0.703	0.7066	0.5051	0.5196	0.2934	0.4	0.36	TRUE	2.50828
b9b11_240_427	NCU03385.2	1.12685	1	1.18283	1.07552	0.2008	0.19371	0.22391	0.20116	0.22445	0.22255	0.24146	0.22604	0.14952	0.14952	0.14952	0.14952	0.06655	0.06655	0.06655	0.06655	0.19526	0.19526	0.19526	0.19526	0.8168	0.3534	0.6306	0.1832	0.1429	0.2865	0.6466	0.8571	0.7606	0.3694	0.7135	0.2394	0.3	0.27	TRUE	5.23501
b9b11_270_1008	NCU03388.2	17.8272	1	5.47346	4.87848	2.48016	0.23857	1.16261	1.16376	1.87745	0.34109	1.50156	1.69631	0.16261	0.16261	0.16261	0.16261	0.07074	0.07074	0.07074	0.07074	0.22348	0.22348	0.22348	0.22348	1	0.9999	0.9999	0	0.0002	0	0.0001	0.9998	0.7893	0.0001	1	0.2107	0.19	0.29	TRUE	3.66448
b9b15_050_983	NCU03692.2	1.0221	1	1.39005	1.2272	0.55929	0.42619	0.86381	0.52989	0.84108	0.57129	1.08069	0.65563	0.31502	0.31502	0.31502	0.31502	0.17409	0.17409	0.17409	0.17409	0.67947	0.67947	0.67947	0.67947	0.5237	0.2946	0.3182	0.4763	0.2641	0.243	0.7054	0.7359	0.6194	0.6818	0.757	0.3806	0.25	0.3	TRUE	1.32644
b9d12_020_646	NCU07795.2	1.18095	1	1.34916	1.16048	0.2654	0.23037	0.29111	0.26496	0.29315	0.27037	0.31376	0.29871	0.18247	0.18247	0.18247	0.18247	0.07985	0.07985	0.07985	0.07985	0.23291	0.23291	0.23291	0.23291	0.8442	0.1994	0.5436	0.1558	0.0676	0.182	0.8006	0.9324	0.8202	0.4564	0.818	0.1798	0.35	0.31	TRUE	3.72557
b9d12_090_581	NCU07802.2	1.5315	1	1.23153	1.20167	0.24648	0.17965	0.20094	0.21259	0.25581	0.20003	0.22761	0.22393	0.12978	0.12978	0.12978	0.12978	0.05776	0.05776	0.05776	0.05776	0.17628	0.17628	0.17628	0.17628	0.9956	0.9518	0.9478	0.0044	0.0736	0.0716	0.0482	0.9264	0.5881	0.0522	0.9284	0.4119	0.26	0.24	TRUE	5.71175
b9d12_100_256	NCU07804.2	1.49409	1	1.10984	1.00391	0.46894	0.32055	0.46814	0.42925	0.42891	0.40005	0.53238	0.61795	0.21486	0.21486	0.21486	0.21486	0.11219	0.11219	0.11219	0.11219	0.38949	0.38949	0.38949	0.38949	0.9353	0.9071	0.8882	0.0647	0.3695	0.506	0.0929	0.6305	0.6132	0.1118	0.494	0.3868	0.43	0.4	TRUE	2.68358
b9d12_110_830	NCU07805.2	1.78109	1	1.30598	1.08991	0.81007	0.48212	0.73253	0.69998	0.6998	0.70254	0.90843	1.33884	0.33911	0.33911	0.33911	0.33911	0.18854	0.18854	0.18854	0.18854	0.7013	0.7013	0.7013	0.7013	0.9279	0.8524	0.8132	0.0721	0.2801	0.4323	0.1476	0.7199	0.6201	0.1868	0.5677	0.3799	0.33	0.32	TRUE	0.333472
b9i2_030_2531	NCU05385.2	1.29042	1	1.28016	1.01862	0.10326	0.08634	0.16083	0.12634	0.09942	0.09074	0.14378	0.14761	0.0383	0.0383	0.0383	0.0383	0.02189	0.02189	0.02189	0.02189	0.14376	0.14376	0.14376	0.14376	0.9939	0.5909	0.9822	0.0061	0.0156	0.3096	0.4091	0.9844	0.9703	0.0178	0.6904	0.0297	0.3	0.29	TRUE	13.2728
b9j10_120_574	NCU08469.2	1.06947	1	1.17741	1.02091	0.05332	0.05299	0.05455	0.05021	0.05284	0.05248	0.05869	0.05276	0.03515	0.03515	0.03515	0.03515	0.01588	0.01588	0.01588	0.01588	0.06004	0.06004	0.06004	0.06004	0.96	0.0129	0.8874	0.04	0.0042	0.2528	0.9871	0.9958	0.9973	0.1126	0.7472	0.0027	0.46	0.24	TRUE	16.1952
b9j10_250_679	NCU08478.2	1.04603	1	1.18957	1.00717	0.10831	0.11118	0.1254	0.10966	0.11895	0.11309	0.12259	0.11893	0.07992	0.07992	0.07992	0.07992	0.03578	0.03578	0.03578	0.03578	0.11302	0.11302	0.11302	0.11302	0.7472	0.0571	0.6859	0.2528	0.034	0.4534	0.9429	0.966	0.971	0.3141	0.5466	0.029	0.18	0.15	TRUE	9.74316
b9j10_270_826	b9j10_270	1.26861	1	1.28724	1.04289	0.22444	0.18292	0.21082	0.1868	0.2227	0.20094	0.22554	0.21375	0.13498	0.13498	0.13498	0.13498	0.0603	0.0603	0.0603	0.0603	0.18246	0.18246	0.18246	0.18246	0.9556	0.4442	0.9046	0.0444	0.0509	0.3614	0.5558	0.9491	0.9413	0.0954	0.6386	0.0587	0.27	0.24	TRUE	5.93702
b9k17_040_1417	NCU01285.2	1.1456	1	1.01809	1.04315	0.36244	0.32922	0.35624	0.37695	0.42704	0.40857	0.45536	0.46917	0.30826	0.30826	0.30826	0.30826	0.12745	0.12745	0.12745	0.12745	0.33225	0.33225	0.33225	0.33225	0.7103	0.6739	0.6208	0.2897	0.4745	0.4376	0.3261	0.5255	0.4664	0.3792	0.5624	0.5336	0.5	0.45	TRUE	-4.73183
b9k17_140_980	NCU10468.2a	1.09548	1	1.22135	1.02353	0.17772	0.16613	0.19264	0.16287	0.17844	0.18144	0.20301	0.18723	0.12206	0.12206	0.12206	0.12206	0.05334	0.05334	0.05334	0.05334	0.17801	0.17801	0.17801	0.17801	0.7982	0.1593	0.7096	0.2018	0.0787	0.4175	0.8407	0.9213	0.9245	0.2904	0.5825	0.0755	0.26	0.23	TRUE	6.41883
g11a3_060_1544	NCU01407.2	1.15356	1	1.31494	1.33464	0.34281	0.32449	0.39981	0.48042	0.39165	0.4122	0.45025	0.55885	0.20491	0.20491	0.20491	0.20491	0.10699	0.10699	0.10699	0.10699	0.40058	0.40058	0.40058	0.40058	0.7782	0.2302	0.2825	0.2218	0.1352	0.1305	0.7698	0.8648	0.4686	0.7175	0.8695	0.5314	0.42	0.39	TRUE	3.25143
g11a3_070_1209	NCU01408.2	1.35755	1	1.21909	1.06067	0.36247	0.24247	0.26928	0.23414	0.37545	0.27491	0.30927	0.26028	0.13472	0.13472	0.13472	0.13472	0.07418	0.07418	0.07418	0.07418	0.31229	0.31229	0.31229	0.31229	0.9402	0.7615	0.9011	0.0598	0.1205	0.3025	0.2385	0.8795	0.8517	0.0989	0.6975	0.1483	0.32	0.29	TRUE	5.33339
g15d1_090_117	NCU04225.2	1.10343	1	1.19682	1.06065	0.35437	0.33738	0.40225	0.3929	0.41304	0.40544	0.49674	0.47096	0.27273	0.27273	0.27273	0.27273	0.1246	0.1246	0.1246	0.1246	0.3608	0.3608	0.3608	0.3608	0.6545	0.3539	0.5572	0.3455	0.2724	0.4071	0.6461	0.7276	0.6631	0.4428	0.5929	0.3369	0.47	0.44	TRUE	0.42371
g15g1_060_1182	NCU07741.2	1.09323	1	1.12389	1.03796	0.08789	0.08404	0.09067	0.08459	0.09078	0.08466	0.09313	0.08561	0.05773	0.05773	0.05773	0.05773	0.02576	0.02576	0.02576	0.02576	0.09753	0.09753	0.09753	0.09753	0.9389	0.2927	0.8087	0.0611	0.0454	0.2253	0.7073	0.9546	0.9199	0.1913	0.7747	0.0801	0.3	0.18	TRUE	11.8203
g15g1_110_168	NCU07746.2	1.42567	1	1.65095	1.17071	0.52055	0.32825	0.54595	0.36635	0.57085	0.41953	0.66066	0.44684	0.26678	0.26678	0.26678	0.26678	0.12116	0.12116	0.12116	0.12116	0.36297	0.36297	0.36297	0.36297	0.9182	0.3107	0.7456	0.0818	0.0616	0.2446	0.6893	0.9384	0.9014	0.2544	0.7554	0.0986	0.46	0.44	TRUE	0.567487
g15g1_190_1356	NCU07754.2	1.25554	1	1.89092	1.04306	0.26905	0.19574	0.35804	0.20108	0.30699	0.21749	0.33654	0.23164	0.12624	0.12624	0.12624	0.12624	0.0608	0.0608	0.0608	0.0608	0.22523	0.22523	0.22523	0.22523	0.9548	0.0204	0.8909	0.0452	0.0039	0.3428	0.9796	0.9961	0.998	0.1091	0.6572	0.002	0.27	0.25	TRUE	5.74705
g15g1_210_451	NCU07756.2	1.08371	1	1.08136	1.00388	0.13249	0.11936	0.13345	0.12734	0.13835	0.13269	0.13122	0.12969	0.09164	0.09164	0.09164	0.09164	0.04213	0.04213	0.04213	0.04213	0.14165	0.14165	0.14165	0.14165	0.8331	0.5132	0.7981	0.1669	0.1964	0.4829	0.4868	0.8036	0.8189	0.2019	0.5171	0.1811	0.2	0.18	TRUE	8.1989
g15g1_270_623	NCU07761.2	1.10945	1	1.03766	1.02535	0.16478	0.15002	0.16431	0.16394	0.18865	0.17102	0.16305	0.16771	0.11523	0.11523	0.11523	0.11523	0.05119	0.05119	0.05119	0.05119	0.18065	0.18065	0.18065	0.18065	0.8406	0.7483	0.7526	0.1594	0.3656	0.3942	0.2517	0.6344	0.5409	0.2474	0.6058	0.4591	0.25	0.22	TRUE	6.84795
g15g1_290_842	NCU07763.2	1.2097	1	1.12893	1.00793	0.37405	0.34067	0.39278	0.38352	0.45328	0.41503	0.49943	0.47046	0.2648	0.2648	0.2648	0.2648	0.12163	0.12163	0.12163	0.12163	0.37759	0.37759	0.37759	0.37759	0.7715	0.6193	0.7378	0.2285	0.3344	0.4948	0.3807	0.6656	0.6528	0.2622	0.5052	0.3472	0.47	0.43	TRUE	0.744518
g15g9_050_676	NCU01054.2	1.18652	1	1.261	1.13338	0.37308	0.34289	0.43741	0.39553	0.42515	0.39501	0.48392	0.54553	0.26075	0.26075	0.26075	0.26075	0.11852	0.11852	0.11852	0.11852	0.37023	0.37023	0.37023	0.37023	0.7636	0.3958	0.5642	0.2364	0.2071	0.2971	0.6042	0.7929	0.6538	0.4358	0.7029	0.3462	0.47	0.43	TRUE	1.33219
g15g9_060_2299	NCU01053.2	1.66292	1	5.52194	1.32213	0.48894	0.34533	1.07397	0.42701	0.76443	0.55837	0.80101	0.57984	0.25289	0.25289	0.25289	0.25289	0.10787	0.10787	0.10787	0.10787	0.2987	0.2987	0.2987	0.2987	0.9711	0.0002	0.8189	0.0289	0	0.1217	0.9998	1	1	0.1811	0.8783	0	0.33	0.39	TRUE	0.883604
g15g9_090_614	NCU01050.2	19.7207	1	57.9469	1.36334	8.32415	0.49139	15.7488	0.676	15.2664	1.63403	8.37364	1.67135	0.39309	0.39309	0.39309	0.39309	0.16325	0.16325	0.16325	0.16325	0.41463	0.41463	0.41463	0.41463	1	0.0108	0.9999	0	0	0.2118	0.9892	1	1	0.0001	0.7882	0	0.18	0.21	TRUE	-6.84426
g15g9_110_1187	NCU01048.2	1.16851	1	1.29685	1.06246	0.22779	0.21025	0.26255	0.21634	0.25389	0.2439	0.26367	0.25424	0.1574	0.1574	0.1574	0.1574	0.06939	0.06939	0.06939	0.06939	0.21598	0.21598	0.21598	0.21598	0.8652	0.2232	0.7258	0.1348	0.077	0.3336	0.7768	0.923	0.9028	0.2742	0.6664	0.0972	0.31	0.28	TRUE	4.69604
g15g9_140_381	NCU01045.2	2.31543	1	2.21772	1.02988	0.79335	0.41926	0.75182	0.4164	0.80815	0.63902	0.8859	0.64302	0.33976	0.33976	0.33976	0.33976	0.13937	0.13937	0.13937	0.13937	0.37912	0.37912	0.37912	0.37912	0.9897	0.5675	0.9782	0.0103	0.0266	0.4423	0.4325	0.9734	0.9776	0.0218	0.5577	0.0224	0.48	0.48	TRUE	-2.74961
g17a4_080_3015	NCU03964.2	1.86237	1	1.89256	1.5375	0.87219	0.54713	0.98183	0.9935	1.04481	0.99091	1.13575	1.64898	0.46056	0.46056	0.46056	0.46056	0.20151	0.20151	0.20151	0.20151	0.6532	0.6532	0.6532	0.6532	0.9217	0.5073	0.6285	0.0783	0.1346	0.2381	0.4927	0.8654	0.6567	0.3715	0.7619	0.3433	0.18	0.22	TRUE	-4.46222
g17a4_170_217	NCU03953.2	1.12352	1	1.57301	1.29365	0.27283	0.29265	0.3525	0.34133	0.32151	0.34346	0.35931	0.41283	0.18341	0.18341	0.18341	0.18341	0.08621	0.08621	0.08621	0.08621	0.30213	0.30213	0.30213	0.30213	0.7632	0.0425	0.2501	0.2368	0.0324	0.1121	0.9575	0.9676	0.8677	0.7499	0.8879	0.1323	0.37	0.33	TRUE	2.28982
g17a4_320_994	NCU03932.2	1.06393	1	1.13816	1.01659	0.19447	0.18003	0.18587	0.15425	0.20694	0.21172	0.17769	0.17369	0.11035	0.11035	0.11035	0.11035	0.05329	0.05329	0.05329	0.05329	0.21365	0.21365	0.21365	0.21365	0.7075	0.2474	0.6541	0.2925	0.1531	0.4256	0.7526	0.8469	0.8617	0.3459	0.5744	0.1383	0.25	0.23	TRUE	7.20002
g17b7_030_3176	NCU00929.2	1.02123	1	1.01057	1.02531	0.29537	0.27753	0.34481	0.32695	0.34971	0.31892	0.39575	0.4072	0.22909	0.22909	0.22909	0.22909	0.1062	0.1062	0.1062	0.1062	0.33165	0.33165	0.33165	0.33165	0.5358	0.5361	0.4936	0.4642	0.4865	0.4438	0.4639	0.5135	0.4863	0.5064	0.5562	0.5137	0.43	0.4	TRUE	1.0306
g21b4_020_1302	NCU04459.2	1.55894	1	1.46761	1.08832	0.25032	0.186	0.23288	0.18512	0.24959	0.1991	0.25213	0.21147	0.13004	0.13004	0.13004	0.13004	0.05833	0.05833	0.05833	0.05833	0.18549	0.18549	0.18549	0.18549	0.9948	0.7075	0.9827	0.0052	0.0138	0.2236	0.2925	0.9862	0.9813	0.0173	0.7764	0.0187	0.26	0.24	TRUE	5.67649
g21b4_270_1372	NCU04435.2	1.47454	1	1.28993	1.38125	0.39772	0.27726	0.39237	0.4183	0.4295	0.35862	0.43404	0.48389	0.21438	0.21438	0.21438	0.21438	0.1011	0.1011	0.1011	0.1011	0.3279	0.3279	0.3279	0.3279	0.9506	0.7567	0.6161	0.0494	0.1502	0.0669	0.2433	0.8498	0.3736	0.3839	0.9331	0.6264	0.4	0.38	TRUE	1.60471
g21b4_300_31	NCU04431.2	2.18216	1	1.76245	1.33829	0.95601	0.44798	0.81022	0.6586	0.96337	0.70953	1.02376	0.999	0.31274	0.31274	0.31274	0.31274	0.1784	0.1784	0.1784	0.1784	0.63877	0.63877	0.63877	0.63877	0.9753	0.7299	0.8701	0.0247	0.0999	0.2057	0.2701	0.9001	0.7792	0.1299	0.7943	0.2208	0.2	0.34	TRUE	2.07959
g21b4_310_787	NCU04430.2	3.16414	1	1.0064	1.11533	1.23139	0.40127	0.49798	0.62376	0.66824	0.61328	0.70914	1.41819	0.25062	0.25062	0.25062	0.25062	0.14668	0.14668	0.14668	0.14668	0.627	0.627	0.627	0.627	0.9932	0.9961	0.9568	0.0068	0.4965	0.3835	0.0039	0.5035	0.4128	0.0432	0.6165	0.5872	0.46	0.48	TRUE	2.67232
g22f9_060_402	NCU03588.2	1.69363	1	1.13442	1.04285	0.5562	0.31447	0.47653	0.48622	0.39106	0.3901	0.50234	0.83642	0.16058	0.16058	0.16058	0.16058	0.0977	0.0977	0.0977	0.0977	0.51555	0.51555	0.51555	0.51555	0.974	0.96	0.9101	0.026	0.2814	0.4249	0.04	0.7186	0.6179	0.0899	0.5751	0.3821	0.39	0.37	TRUE	4.70489
g3c5_160_1058	NCU05183.2a	1.50678	1	1.34151	1.03255	0.32548	0.24428	0.34295	0.27856	0.33307	0.27911	0.35812	0.35298	0.17286	0.17286	0.17286	0.17286	0.08085	0.08085	0.08085	0.08085	0.28267	0.28267	0.28267	0.28267	0.9785	0.7801	0.9533	0.0215	0.0848	0.4184	0.2199	0.9152	0.8966	0.0467	0.5816	0.1034	0.35	0.32	TRUE	3.01602
g3c5_200_202	NCU05179.2	1.31165	1	1.4292	1.29616	0.32103	0.22145	0.32153	0.28169	0.31319	0.23784	0.33598	0.2853	0.07647	0.07647	0.07647	0.07647	0.05089	0.05089	0.05089	0.05089	0.41858	0.41858	0.41858	0.41858	0.9521	0.1893	0.5556	0.0479	0.0337	0.03	0.8107	0.9663	0.8322	0.4444	0.97	0.1678	0.24	0.22	TRUE	8.80362
g65a3_110_754	NCU04260.2	1.07733	1	1.02991	1.05327	0.1458	0.14426	0.15436	0.146	0.16438	0.15042	0.15015	0.15886	0.10651	0.10651	0.10651	0.10651	0.04705	0.04705	0.04705	0.04705	0.16197	0.16197	0.16197	0.16197	0.791	0.6933	0.5874	0.209	0.3908	0.2817	0.3067	0.6092	0.4026	0.4126	0.7183	0.5974	0.23	0.2	TRUE	7.71167
h4h7_130_159	NCU04753.2	1.0684	1	1.18303	1.02492	0.17272	0.16448	0.1767	0.1604	0.17405	0.17188	0.19329	0.17676	0.12341	0.12341	0.12341	0.12341	0.05565	0.05565	0.05565	0.05565	0.16627	0.16627	0.16627	0.16627	0.727	0.1772	0.6314	0.273	0.0976	0.3986	0.8228	0.9024	0.8939	0.3686	0.6014	0.1061	0.25	0.23	TRUE	5.46511
h4h7_190_2449	NCU04747.2	1.45706	1	1.256	1.00302	0.28474	0.22675	0.30354	0.25828	0.3061	0.26355	0.32241	0.31054	0.15769	0.15769	0.15769	0.15769	0.07694	0.07694	0.07694	0.07694	0.26712	0.26712	0.26712	0.26712	0.977	0.8528	0.9604	0.023	0.1132	0.4944	0.1472	0.8868	0.8802	0.0396	0.5056	0.1198	0.33	0.3	TRUE	4.54343
h4h7_220_377	NCU10519.2b	1.3209	1	1.03186	1.05868	0.19096	0.16147	0.15405	0.16427	0.19836	0.17008	0.17969	0.17787	0.11335	0.11335	0.11335	0.11335	0.05091	0.05091	0.05091	0.05091	0.17601	0.17601	0.17601	0.17601	0.9827	0.9715	0.9534	0.0173	0.392	0.2774	0.0285	0.608	0.3968	0.0466	0.7226	0.6032	0.24	0.21	TRUE	6.63618
h4h7_230_951	NCU04744.2	1.26832	1	1.10568	1.14173	0.24638	0.19986	0.24542	0.24454	0.25147	0.22482	0.25898	0.28552	0.13821	0.13821	0.13821	0.13821	0.06663	0.06663	0.06663	0.06663	0.24026	0.24026	0.24026	0.24026	0.9473	0.8538	0.752	0.0527	0.2561	0.1601	0.1462	0.7439	0.4189	0.248	0.8399	0.5811	0.3	0.27	TRUE	5.65937
mito_030_315	mito_030	1.28573	1	1.33589	1.28699	0.36233	0.31626	0.32383	0.35206	0.38317	0.4322	0.32485	0.40789	0.16625	0.16625	0.16625	0.16625	0.09152	0.09152	0.09152	0.09152	0.38653	0.38653	0.38653	0.38653	0.8744	0.3882	0.4974	0.1256	0.1032	0.1188	0.6118	0.8968	0.594	0.5026	0.8812	0.406	0.37	0.34	TRUE	4.28589
mito_120_631	mito_120	1.2088	1	1.49009	1.26201	0.34621	0.28725	0.39469	0.35802	0.38192	0.36869	0.42527	0.43865	0.23388	0.23388	0.23388	0.23388	0.10043	0.10043	0.10043	0.10043	0.28733	0.28733	0.28733	0.28733	0.8231	0.1484	0.4219	0.1769	0.065	0.1468	0.8516	0.935	0.7792	0.5781	0.8532	0.2208	0.41	0.37	TRUE	-0.876702
NCU00098.1_78	NCU00098.2	1.15343	1	1.15463	1.05165	0.37238	0.28063	0.37107	0.29789	0.43323	0.3593	0.42317	0.35287	0.229	0.229	0.229	0.229	0.10605	0.10605	0.10605	0.10605	0.32789	0.32789	0.32789	0.32789	0.7478	0.5027	0.6425	0.2522	0.2805	0.3902	0.4973	0.7195	0.6786	0.3575	0.6098	0.3214	0.43	0.39	TRUE	1.10444
NCU00383.1_15	NCU00383.2	1.21717	1	1.49527	1.18948	0.33874	0.32879	0.42166	0.37238	0.40953	0.41642	0.42697	0.47298	0.22763	0.22763	0.22763	0.22763	0.10726	0.10726	0.10726	0.10726	0.32937	0.32937	0.32937	0.32937	0.8275	0.1677	0.5463	0.1725	0.0756	0.2483	0.8323	0.9244	0.8538	0.4537	0.7517	0.1462	0.43	0.39	TRUE	1.68837
NCU00613.1_69	NCU00613.2	1.09695	1	1.15565	1.0885	0.19836	0.18853	0.20046	0.19695	0.21646	0.21834	0.2301	0.21269	0.14294	0.14294	0.14294	0.14294	0.06278	0.06278	0.06278	0.06278	0.1922	0.1922	0.1922	0.1922	0.7688	0.3367	0.5219	0.2312	0.1745	0.2561	0.6633	0.8255	0.688	0.4781	0.7439	0.312	0.29	0.26	TRUE	5.41498
NCU00683.1_124	NCU00683.2	1.24723	1	1.09465	1.14808	0.3172	0.26671	0.3357	0.34219	0.36535	0.33031	0.37408	0.41565	0.20413	0.20413	0.20413	0.20413	0.09566	0.09566	0.09566	0.09566	0.3076	0.3076	0.3076	0.3076	0.8768	0.7696	0.6432	0.1232	0.3446	0.2232	0.2304	0.6554	0.4237	0.3568	0.7768	0.5763	0.4	0.36	TRUE	2.1597
NCU00820.1_43	NCU00820.2	1.26066	1	1.25938	1.18649	0.28521	0.2349	0.28577	0.28101	0.32604	0.27585	0.32869	0.31206	0.18855	0.18855	0.18855	0.18855	0.08079	0.08079	0.08079	0.08079	0.24922	0.24922	0.24922	0.24922	0.9103	0.5021	0.6275	0.0897	0.1324	0.1658	0.4979	0.8676	0.6409	0.3725	0.8342	0.3591	0.36	0.32	TRUE	3.47045
NCU01195.M__NCU01196.M__1_137	ChIP_Chip_16	1.98825	1	1.35606	1.07201	0.76737	0.41528	0.69869	0.54995	0.68859	0.6263	0.85473	0.96702	0.3103	0.3103	0.3103	0.3103	0.15144	0.15144	0.15144	0.15144	0.52413	0.52413	0.52413	0.52413	0.9595	0.9014	0.9032	0.0405	0.2621	0.408	0.0986	0.7379	0.6694	0.0968	0.592	0.3306	0.15	0.22	TRUE	-0.498588
NCU01196.1__2_118_RevCom	ChIP_Chip_22	1.12226	1	1.5322	1.10366	0.41622	0.36697	0.57185	0.43928	0.50809	0.49875	0.65822	0.56643	0.30413	0.30413	0.30413	0.30413	0.13798	0.13798	0.13798	0.13798	0.3838	0.3838	0.3838	0.3838	0.65	0.1415	0.5217	0.35	0.1198	0.3527	0.8585	0.8802	0.8388	0.4783	0.6473	0.1612	0.18	0.47	TRUE	0.0127862
NCU01318.1__1_473	ChIP_Chip_34	1.09152	1	1.1632	1.03719	0.16673	0.15353	0.17107	0.15978	0.17145	0.16678	0.16965	0.17098	0.11186	0.11186	0.11186	0.11186	0.05028	0.05028	0.05028	0.05028	0.1658	0.1658	0.1658	0.1658	0.8096	0.2584	0.6792	0.1904	0.1062	0.3554	0.7416	0.8938	0.8695	0.3208	0.6446	0.1305	0.24	0.21	TRUE	6.85552
NCU01318.1__4_196_RevCom	ChIP_Chip_35	1.1605	1	1.22143	1.06718	0.28232	0.2636	0.42109	0.38533	0.29202	0.28828	0.4562	0.45287	0.15863	0.15863	0.15863	0.15863	0.0857	0.0857	0.0857	0.0857	0.34481	0.34481	0.34481	0.34481	0.814	0.3674	0.6573	0.186	0.195	0.3505	0.6326	0.805	0.6971	0.3427	0.6495	0.3029	0.36	0.32	TRUE	4.89003
NCU01397.1_808	NCU01397.2	1.27994	1	1.10955	1.14938	0.35982	0.28653	0.35281	0.36623	0.40894	0.3569	0.39968	0.43591	0.23282	0.23282	0.23282	0.23282	0.10627	0.10627	0.10627	0.10627	0.33017	0.33017	0.33017	0.33017	0.8589	0.7636	0.6668	0.1411	0.341	0.2521	0.2364	0.659	0.4396	0.3332	0.7479	0.5604	0.43	0.4	TRUE	1.80744
NCU01398.1_478	NCU01398.2	1.12257	1	1.05355	1.00748	0.22283	0.20979	0.21231	0.20674	0.23837	0.22419	0.24756	0.2363	0.16136	0.16136	0.16136	0.16136	0.07027	0.07027	0.07027	0.07027	0.23089	0.23089	0.23089	0.23089	0.7977	0.6726	0.7469	0.2023	0.3701	0.4758	0.3274	0.6299	0.6215	0.2531	0.5242	0.3785	0.32	0.28	TRUE	4.68021
NCU01399.1_624	NCU01399.2	1.30831	1	1.417	1.00152	0.19264	0.14935	0.205	0.15644	0.19801	0.18584	0.20388	0.17765	0.11265	0.11265	0.11265	0.11265	0.04847	0.04847	0.04847	0.04847	0.16603	0.16603	0.16603	0.16603	0.9799	0.2148	0.9706	0.0201	0.0135	0.4992	0.7852	0.9865	0.9906	0.0294	0.5008	0.0094	0.23	0.21	TRUE	7.20391
NCU01425.M__NCU01426.M__1_123	ChIP_Chip_38	1.94545	1	2.35216	1.20266	0.55446	0.31991	0.65244	0.38094	0.62616	0.46063	0.66036	0.50972	0.26306	0.26306	0.26306	0.26306	0.11206	0.11206	0.11206	0.11206	0.31048	0.31048	0.31048	0.31048	0.9878	0.2104	0.9484	0.0122	0.0066	0.2134	0.7896	0.9934	0.9905	0.0516	0.7866	0.0095	0.41	0.41	TRUE	-0.778879
NCU01426.M__NCU01427.M__1_103	ChIP_Chip_43	1.19019	1	1.20632	1.03384	0.108	0.09349	0.1065	0.09661	0.11031	0.09899	0.11311	0.10292	0.06684	0.06684	0.06684	0.06684	0.03035	0.03035	0.03035	0.03035	0.09505	0.09505	0.09505	0.09505	0.9858	0.4034	0.9581	0.0142	0.0162	0.2739	0.5966	0.9838	0.9801	0.0419	0.7261	0.0199	0.15	0.27	TRUE	11.1426
NCU01481.1_1553	NCU01481.2	1.32091	1	1.24597	1.04567	0.45821	0.26289	0.48273	0.27529	0.44628	0.25845	0.6243	0.29032	0.11332	0.11332	0.11332	0.11332	0.07336	0.07336	0.07336	0.07336	0.4313	0.4313	0.4313	0.4313	0.9498	0.6125	0.8896	0.0502	0.151	0.3311	0.3875	0.849	0.8412	0.1104	0.6689	0.1588	0.31	0.29	TRUE	6.39747
NCU01484.1_194	NCU01484.2	1.4477	1	1.22197	1.285	0.24402	0.18538	0.20369	0.21148	0.24072	0.19253	0.22019	0.23799	0.12997	0.12997	0.12997	0.12997	0.05746	0.05746	0.05746	0.05746	0.18322	0.18322	0.18322	0.18322	0.9904	0.9161	0.8142	0.0096	0.0736	0.0313	0.0839	0.9264	0.323	0.1858	0.9687	0.677	0.26	0.24	TRUE	4.8259
NCU01486.1_2389	NCU01486.2	1.08201	1	1.50572	1.16528	0.61506	0.40389	0.75455	0.45621	1.03126	0.5259	0.77075	0.4878	0.26291	0.26291	0.26291	0.26291	0.14999	0.14999	0.14999	0.14999	0.61418	0.61418	0.61418	0.61418	0.5896	0.2523	0.4172	0.4104	0.144	0.2692	0.7477	0.856	0.831	0.5828	0.7308	0.169	0.19	0.49	TRUE	2.24404
NCU01508.1_192	NCU01508.2	1.14895	1	1.10956	1.04072	0.21174	0.19775	0.21131	0.20242	0.22449	0.2149	0.22799	0.23245	0.1474	0.1474	0.1474	0.1474	0.06494	0.06494	0.06494	0.06494	0.205	0.205	0.205	0.205	0.8547	0.6128	0.7409	0.1453	0.2422	0.3742	0.3872	0.7578	0.6868	0.2591	0.6258	0.3132	0.3	0.26	TRUE	5.25505
NCU01518.1_66	NCU01518.2	1.37633	1	1.25229	1.15565	0.2748	0.2071	0.24984	0.23749	0.27071	0.24051	0.28087	0.2807	0.16336	0.16336	0.16336	0.16336	0.0707	0.0707	0.0707	0.0707	0.21249	0.21249	0.21249	0.21249	0.9699	0.755	0.8439	0.0301	0.1	0.1546	0.245	0.9	0.7096	0.1561	0.8454	0.2904	0.32	0.29	TRUE	3.02295
NCU01583.1_58	NCU01583.2	1.26015	1	1.4441	1.01625	0.30807	0.26194	0.36528	0.28134	0.34656	0.33421	0.38159	0.33766	0.21457	0.21457	0.21457	0.21457	0.09385	0.09385	0.09385	0.09385	0.26267	0.26267	0.26267	0.26267	0.8829	0.2291	0.827	0.1171	0.0632	0.4711	0.7709	0.9368	0.9437	0.173	0.5289	0.0563	0.39	0.36	TRUE	-0.228587
NCU01609.1_72	NCU01609.2	1.23618	1	1.13618	1.0038	0.5193	0.39806	0.65541	0.50796	0.53251	0.50028	0.87658	0.73179	0.26702	0.26702	0.26702	0.26702	0.15229	0.15229	0.15229	0.15229	0.62015	0.62015	0.62015	0.62015	0.7834	0.6146	0.7237	0.2166	0.3789	0.513	0.3854	0.6211	0.6029	0.2763	0.487	0.3971	0.21	0.49	TRUE	2.02178
NCU01617.1_265	NCU01617.2	1.31339	1	1.21587	1.16017	0.19253	0.15747	0.18159	0.17676	0.20178	0.18353	0.18504	0.197	0.11432	0.11432	0.11432	0.11432	0.05154	0.05154	0.05154	0.05154	0.16018	0.16018	0.16018	0.16018	0.9816	0.7809	0.8563	0.0184	0.0714	0.0889	0.2191	0.9286	0.6875	0.1437	0.9111	0.3125	0.24	0.21	TRUE	5.76119
NCU01622.1_6	NCU01622.2	2.63315	1	2.03333	1.13795	1.06739	0.46686	0.94255	0.54937	0.99215	0.80603	1.0557	1.1214	0.39816	0.39816	0.39816	0.39816	0.17415	0.17415	0.17415	0.17415	0.46868	0.46868	0.46868	0.46868	0.9783	0.7885	0.9397	0.0217	0.0885	0.3295	0.2115	0.9115	0.8771	0.0603	0.6705	0.1229	0.18	0.16	TRUE	-3.18979
NCU01627.1_411	NCU01627.2	1.59531	1	1.87826	1.74337	0.59209	0.3951	0.87733	0.99326	0.68087	0.60606	0.98982	1.22464	0.24636	0.24636	0.24636	0.24636	0.14258	0.14258	0.14258	0.14258	0.57313	0.57313	0.57313	0.57313	0.9405	0.2367	0.4092	0.0595	0.0639	0.0889	0.7633	0.9361	0.5758	0.5908	0.9111	0.4242	0.48	0.47	TRUE	2.0737
NCU01662.1_28	NCU01662.2	1.69835	1	1.10885	1.02529	0.86706	0.54564	0.66941	0.72206	0.79259	0.81975	0.91161	1.40589	0.42582	0.42582	0.42582	0.42582	0.21854	0.21854	0.21854	0.21854	0.7891	0.7891	0.7891	0.7891	0.8615	0.8778	0.7765	0.1385	0.4342	0.4994	0.1222	0.5658	0.5566	0.2235	0.5006	0.4434	0.24	0.24	TRUE	-1.12493
NCU01687.1_182	NCU01687.2	1.2266	1	1.07924	1.00226	0.31761	0.27316	0.32977	0.3167	0.33362	0.34079	0.36197	0.36613	0.20986	0.20986	0.20986	0.20986	0.0982	0.0982	0.0982	0.0982	0.33187	0.33187	0.33187	0.33187	0.8472	0.7589	0.8052	0.1528	0.3653	0.4954	0.2411	0.6347	0.6229	0.1948	0.5046	0.3771	0.4	0.37	TRUE	1.00339
NCU01693.1_59	NCU01693.2	1.2606	1	1.1142	1.02463	0.27613	0.24299	0.25302	0.2458	0.30615	0.27915	0.29786	0.27105	0.1873	0.1873	0.1873	0.1873	0.08238	0.08238	0.08238	0.08238	0.24037	0.24037	0.24037	0.24037	0.9071	0.7761	0.8601	0.0929	0.2859	0.4366	0.2239	0.7141	0.6967	0.1399	0.5634	0.3033	0.35	0.32	TRUE	1.26963
NCU01711.1_358	NCU01711.2	1.06461	1	1.22919	1.19601	0.17336	0.16199	0.19005	0.19213	0.18487	0.17485	0.1924	0.19943	0.11833	0.11833	0.11833	0.11833	0.05208	0.05208	0.05208	0.05208	0.16943	0.16943	0.16943	0.16943	0.7266	0.1013	0.1678	0.2734	0.0657	0.0634	0.8987	0.9343	0.6119	0.8322	0.9366	0.3881	0.25	0.22	TRUE	6.05801
NCU01723.1_980	NCU01723.2	1.69555	1	1.17042	1.39208	0.76805	0.48541	0.65183	0.92385	0.79892	0.69525	0.98189	1.33025	0.34991	0.34991	0.34991	0.34991	0.18924	0.18924	0.18924	0.18924	0.68645	0.68645	0.68645	0.68645	0.9188	0.8708	0.6518	0.0812	0.3697	0.2383	0.1292	0.6303	0.3867	0.3482	0.7617	0.6133	0.16	0.22	TRUE	0.381472
NCU01909.1_99	NCU01909.2	1.75508	1	1.19538	1.11366	0.65215	0.37867	0.68626	0.52683	0.60743	0.47589	0.96715	0.79494	0.24238	0.24238	0.24238	0.24238	0.14078	0.14078	0.14078	0.14078	0.56217	0.56217	0.56217	0.56217	0.9626	0.8636	0.8894	0.0374	0.329	0.319	0.1364	0.671	0.5588	0.1106	0.681	0.4412	0.48	0.47	TRUE	2.39882
NCU02356.M__NCU02357.M__3_136	ChIP_Chip_76	1.26217	1	1.42493	1.08391	0.36678	0.31179	0.43401	0.37541	0.40552	0.37954	0.47511	0.49237	0.23811	0.23811	0.23811	0.23811	0.10962	0.10962	0.10962	0.10962	0.35011	0.35011	0.35011	0.35011	0.8611	0.2798	0.7183	0.1389	0.1004	0.3507	0.7202	0.8996	0.8426	0.2817	0.6493	0.1574	0.44	0.4	TRUE	2.18803
NCU02427.1__1_66	ChIP_Chip_88	1.51168	1	1.20052	1.01124	0.64628	0.45004	0.64286	0.64725	0.59214	0.61386	0.76356	1.13217	0.30796	0.30796	0.30796	0.30796	0.1698	0.1698	0.1698	0.1698	0.6453	0.6453	0.6453	0.6453	0.891	0.8073	0.796	0.109	0.3272	0.5091	0.1927	0.6728	0.6335	0.204	0.4909	0.3665	0.18	0.16	TRUE	0.994442
NCU02429.1__3_225_RevCom	ChIP_Chip_95	1.34248	1	1.22639	1.08019	0.18189	0.16892	0.18346	0.17556	0.18965	0.186	0.1771	0.19225	0.09532	0.09532	0.09532	0.09532	0.04592	0.04592	0.04592	0.04592	0.18633	0.18633	0.18633	0.18633	0.9881	0.8433	0.9517	0.0119	0.0602	0.24422	0.1567	0.9398	0.8997	0.0483	0.75578	0.1003	0.23	0.2	TRUE	7.55765
NCU02430.M__NCU02431.M__2_60	ChIP_Chip_100	1.34254	1	1.27003	1.05343	0.51587	0.41505	0.61374	0.54622	0.53705	0.48947	0.77403	0.77907	0.29416	0.29416	0.29416	0.29416	0.14587	0.14587	0.14587	0.14587	0.48093	0.48093	0.48093	0.48093	0.8291	0.5826	0.7226	0.1709	0.276	0.4258	0.4174	0.724	0.6544	0.2774	0.5742	0.3456	0.26	0.49	TRUE	0.126717
NCU02432.1__1_423	ChIP_Chip_104	1.92042	1	1.43831	1.21017	0.88932	0.5117	0.82131	0.8028	0.85251	0.79117	0.99467	1.47602	0.37274	0.37274	0.37274	0.37274	0.19483	0.19483	0.19483	0.19483	0.71788	0.71788	0.71788	0.71788	0.929	0.8167	0.7821	0.071	0.2382	0.3531	0.1833	0.7618	0.6104	0.2179	0.6469	0.3896	0.23	0.29	TRUE	-0.584029
NCU02433.1__1_453	ChIP_Chip_107	2.30177	1	1.42079	1.05514	0.31056	0.20387	0.21395	0.25056	0.22943	0.21686	0.18922	0.36225	0.04931	0.04931	0.04931	0.04931	0.03357	0.03357	0.03357	0.03357	0.29195	0.29195	0.29195	0.29195	0.9971	0.9958	0.9946	0.0029	0.0206	0.2733	0.0042	0.9794	0.9688	0.0054	0.7267	0.0312	0.18	0.16	TRUE	12.0141
NCU02440.1_5	NCU02440.2	1.18675	1	1.20765	1.13987	0.28015	0.24789	0.27539	0.27516	0.31758	0.28762	0.31039	0.30495	0.19697	0.19697	0.19697	0.19697	0.08588	0.08588	0.08588	0.08588	0.25651	0.25651	0.25651	0.25651	0.838	0.4625	0.5905	0.162	0.1755	0.221	0.5375	0.8245	0.6309	0.4095	0.779	0.3691	0.37	0.33	TRUE	3.23592
NCU02446.1_45	NCU02446.2	1.06238	1	1.23145	1.08597	0.6137	0.61514	0.84946	0.81417	0.93769	0.93297	1.38458	1.39894	0.60622	0.60622	0.60622	0.60622	0.28612	0.28612	0.28612	0.28612	0.99675	0.99675	0.99675	0.99675	0.5389	0.4157	0.5016	0.4611	0.3986	0.4653	0.5843	0.6014	0.558	0.4984	0.5347	0.442	0.16	0.18	TRUE	-2.94907
NCU02465.1_37	NCU02465.2	1.37492	1	1.35335	1.29816	0.53342	0.39844	0.6831	0.67408	0.5653	0.51264	0.80856	0.94797	0.30147	0.30147	0.30147	0.30147	0.14918	0.14918	0.14918	0.14918	0.50689	0.50689	0.50689	0.50689	0.8575	0.528	0.5633	0.1425	0.2209	0.2167	0.472	0.7791	0.5361	0.4367	0.7833	0.4639	0.37	0.49	TRUE	0.746632
NCU02824.1_168	NCU02824.2	1.63284	1	1.16816	1.0933	0.54447	0.32879	0.41441	0.36792	0.60326	0.42307	0.51294	0.46007	0.26245	0.26245	0.26245	0.26245	0.12144	0.12144	0.12144	0.12144	0.38272	0.38272	0.38272	0.38272	0.9563	0.8701	0.8994	0.0437	0.2968	0.354	0.1299	0.7032	0.6147	0.1006	0.646	0.3853	0.45	0.43	TRUE	-0.792786
NCU02835.1_319	NCU02835.2	1.04854	1	1.08701	1.08063	0.23869	0.23811	0.34537	0.35914	0.25315	0.25022	0.39895	0.41908	0.13684	0.13684	0.13684	0.13684	0.07418	0.07418	0.07418	0.07418	0.33015	0.33015	0.33015	0.33015	0.6416	0.3931	0.4379	0.3584	0.3294	0.2895	0.6069	0.6706	0.5145	0.5621	0.7105	0.4855	0.33	0.29	TRUE	5.82958
NCU03005.1_458	NCU03005.2	1.5805	1	1.32784	1.09082	0.39361	0.27264	0.36876	0.32645	0.42229	0.33465	0.42901	0.39908	0.20437	0.20437	0.20437	0.20437	0.0956	0.0956	0.0956	0.0956	0.31797	0.31797	0.31797	0.31797	0.9723	0.8276	0.931	0.0277	0.1162	0.3183	0.1724	0.8838	0.8121	0.069	0.6817	0.1879	0.39	0.36	TRUE	2.53047
NCU03060.1__5_395	ChIP_Chip_200	1.85029	1	1.25102	1.59183	0.89425	0.51705	0.72889	1.0867	0.93263	0.83488	1.08975	1.48594	0.39432	0.39432	0.39432	0.39432	0.20481	0.20481	0.20481	0.20481	0.7477	0.7477	0.7477	0.7477	0.9143	0.8711	0.607	0.0857	0.3331	0.1917	0.1289	0.6669	0.3676	0.393	0.8083	0.6324	0.2	0.47	TRUE	-1.30065
NCU03060.M__NCU03061.M__1_142	ChIP_Chip_202	1.21225	1	1.28264	1.00243	0.15209	0.12425	0.15512	0.13364	0.16159	0.14383	0.15923	0.14348	0.09298	0.09298	0.09298	0.09298	0.04129	0.04129	0.04129	0.04129	0.13486	0.13486	0.13486	0.13486	0.9701	0.2436	0.9526	0.0299	0.0214	0.48249	0.7564	0.9786	0.9864	0.0474	0.51751	0.0136	0.2	0.18	TRUE	8.88959
NCU03061.1__1_112	ChIP_Chip_206	1.7376	1	1.48865	1.06176	0.70636	0.41544	0.75468	0.64909	0.62412	0.6119	0.85023	1.19292	0.28832	0.28832	0.28832	0.28832	0.16039	0.16039	0.16039	0.16039	0.60409	0.60409	0.60409	0.60409	0.9457	0.725	0.8418	0.0543	0.1647	0.4514	0.275	0.8353	0.7372	0.1582	0.5486	0.2628	0.37	0.16	TRUE	1.60829
NCU03069.1_12	NCU03069.1	1.05957	1	1.23938	1.08238	0.24097	0.23259	0.30687	0.26587	0.28319	0.30424	0.30924	0.30169	0.19219	0.19219	0.19219	0.19219	0.08283	0.08283	0.08283	0.08283	0.2531	0.2531	0.2531	0.2531	0.6381	0.1791	0.4565	0.3619	0.147	0.3207	0.8209	0.853	0.7779	0.5435	0.6793	0.2221	0.36	0.32	TRUE	2.97109
NCU03137.1__3_395_RevCom	ChIP_Chip_214	1.23613	1	1.1006	1.14947	0.34927	0.28922	0.41175	0.50725	0.32097	0.31032	0.44125	0.62114	0.13732	0.13732	0.13732	0.13732	0.08824	0.08824	0.08824	0.08824	0.47405	0.47405	0.47405	0.47405	0.8966	0.8027	0.6344	0.1034	0.3007	0.2318	0.1973	0.6993	0.4261	0.3656	0.7682	0.5739	0.36	0.33	TRUE	5.83117
NCU03256.1_62	NCU03256.2	1.05983	1	1.3056	1.12332	0.18997	0.19268	0.23046	0.1998	0.22061	0.21005	0.23713	0.22454	0.14368	0.14368	0.14368	0.14368	0.063	0.063	0.063	0.063	0.19502	0.19502	0.19502	0.19502	0.689	0.0707	0.343	0.311	0.0556	0.1811	0.9293	0.9444	0.8726	0.657	0.8189	0.1274	0.29	0.26	TRUE	5.06691
NCU03353.1_152	NCU03353.2	1.20292	1	1.34373	1.15053	0.46149	0.39603	0.46853	0.41497	0.59148	0.53189	0.53583	0.50675	0.30092	0.30092	0.30092	0.30092	0.13672	0.13672	0.13672	0.13672	0.40353	0.40353	0.40353	0.40353	0.7146	0.35	0.5575	0.2854	0.1876	0.2857	0.65	0.8124	0.7112	0.4425	0.7143	0.2888	0.18	0.47	TRUE	-2.61927
NCU03583.1_219	NCU03583.2	1.6403	1	1.26323	1.07541	0.26128	0.18321	0.18632	0.17678	0.24795	0.20034	0.20071	0.1872	0.10174	0.10174	0.10174	0.10174	0.04926	0.04926	0.04926	0.04926	0.19297	0.19297	0.19297	0.19297	0.9949	0.9797	0.9913	0.0051	0.0436	0.2157	0.0203	0.9564	0.9348	0.0087	0.7843	0.0652	0.23	0.21	TRUE	7.25171
NCU03594.1_7	NCU03594.2	1.41713	1	1.42413	1.01738	0.35223	0.27654	0.35535	0.30267	0.37645	0.33287	0.41185	0.36283	0.2255	0.2255	0.2255	0.2255	0.09617	0.09617	0.09617	0.09617	0.27575	0.27575	0.27575	0.27575	0.949	0.4866	0.9105	0.051	0.0744	0.4745	0.5134	0.9256	0.9376	0.0895	0.5255	0.0624	0.4	0.37	TRUE	-0.968306
NCU03609.1_3	NCU03609.2	1.17866	1	1.36516	1.01606	0.23254	0.21463	0.30265	0.2322	0.26329	0.25969	0.31383	0.28401	0.15351	0.15351	0.15351	0.15351	0.07289	0.07289	0.07289	0.07289	0.23851	0.23851	0.23851	0.23851	0.8695	0.1531	0.8074	0.1305	0.0618	0.4495	0.8469	0.9382	0.9366	0.1926	0.5505	0.0634	0.32	0.29	TRUE	5.26809
NCU03677.1_204	NCU03677.2	1.24792	1	1.0227	1.06938	0.32144	0.28184	0.27153	0.30303	0.36103	0.33458	0.316	0.35885	0.22803	0.22803	0.22803	0.22803	0.09969	0.09969	0.09969	0.09969	0.27438	0.27438	0.27438	0.27438	0.8686	0.8457	0.7441	0.1314	0.4537	0.3781	0.1543	0.5463	0.4137	0.2559	0.6219	0.5863	0.41	0.37	TRUE	-0.76976
NCU04517.1_11	NCU04517.2	1.45736	1	1.6422	1.07114	0.36107	0.28259	0.42249	0.32935	0.38402	0.34637	0.46268	0.40288	0.19749	0.19749	0.19749	0.19749	0.09513	0.09513	0.09513	0.09513	0.30657	0.30657	0.30657	0.30657	0.955	0.2463	0.9016	0.045	0.0319	0.3539	0.7537	0.9681	0.9547	0.0984	0.6461	0.0453	0.38	0.35	TRUE	3.74667
NCU04562.1_32	NCU04562.2	2.85735	1	1.38959	1.23426	0.64139	0.23503	0.37154	0.30996	0.53503	0.30457	0.44667	0.41365	0.166	0.166	0.166	0.166	0.08141	0.08141	0.08141	0.08141	0.2854	0.2854	0.2854	0.2854	0.9989	0.9932	0.9957	0.0011	0.0633	0.0933	0.0068	0.9367	0.7782	0.0043	0.9067	0.2218	0.3	0.31	TRUE	3.72293
NCU04567.1_2	NCU04567.2	1.68902	1	1.10368	1.59582	0.85992	0.48425	0.66018	0.93271	0.98768	0.71542	0.99558	1.30566	0.42362	0.42362	0.42362	0.42362	0.19461	0.19461	0.19461	0.19461	0.57165	0.57165	0.57165	0.57165	0.8503	0.8786	0.5459	0.1497	0.4376	0.1285	0.1214	0.5624	0.2968	0.4541	0.8715	0.7032	0.18	0.32	TRUE	-1.87887
NCU04660.1_13	NCU04660.2	1.03256	1	1.02191	1.00892	0.0827	0.08451	0.08449	0.08169	0.08272	0.08582	0.08354	0.08486	0.06029	0.06029	0.06029	0.06029	0.02727	0.02727	0.02727	0.02727	0.09049	0.09049	0.09049	0.09049	0.7388	0.586	0.6556	0.2612	0.3604	0.4363	0.414	0.6396	0.6047	0.3444	0.5637	0.3953	0.23	0.24	TRUE	11.5944
NCU04833.1_34	NCU04833.2	1.06515	1	1.19502	1.05473	0.10974	0.10791	0.12435	0.11177	0.11395	0.11416	0.12035	0.11835	0.07582	0.07582	0.07582	0.07582	0.03442	0.03442	0.03442	0.03442	0.12139	0.12139	0.12139	0.12139	0.8282	0.0634	0.5576	0.1718	0.0303	0.2122	0.9366	0.9697	0.9454	0.4424	0.7878	0.0546	0.17	0.42	TRUE	9.86985
NCU04895.1_150	NCU04895.2	1.31769	1	1.02471	1.03437	0.34933	0.30035	0.29226	0.31664	0.3479	0.36812	0.32619	0.41247	0.21368	0.21368	0.21368	0.21368	0.10009	0.10009	0.10009	0.10009	0.32013	0.32013	0.32013	0.32013	0.9084	0.8894	0.8367	0.0916	0.4582	0.4464	0.1106	0.5418	0.4838	0.1633	0.5536	0.5162	0.41	0.38	TRUE	2.79243
NCU04956.1_194	NCU10984.2a	1.26446	1	1.23895	1.08352	0.30889	0.28889	0.3359	0.32819	0.35954	0.29418	0.39882	0.38074	0.19753	0.19753	0.19753	0.19753	0.09488	0.09488	0.09488	0.09488	0.31843	0.31843	0.31843	0.31843	0.8914	0.5504	0.7669	0.1086	0.1665	0.3219	0.4496	0.8335	0.7338	0.2331	0.6781	0.2662	0.38	0.35	TRUE	3.12507
NCU04994.1_1071	NCU04994.2	1.70944	1	1.10841	1.06124	0.36072	0.2279	0.25993	0.25456	0.35837	0.26808	0.29142	0.30206	0.18006	0.18006	0.18006	0.18006	0.07885	0.07885	0.07885	0.07885	0.24532	0.24532	0.24532	0.24532	0.9944	0.9818	0.98	0.0056	0.2836	0.3432	0.0182	0.7164	0.6159	0.02	0.6568	0.3841	0.33	0.31	TRUE	2.21167
NCU04996.1_494	NCU04996.2	1.1073	1	1.16021	1.0179	0.05737	0.05172	0.05814	0.05308	0.05682	0.05352	0.05709	0.05638	0.03629	0.03629	0.03629	0.03629	0.01616	0.01616	0.01616	0.01616	0.05667	0.05667	0.05667	0.05667	0.987	0.0875	0.9652	0.013	0.0047	0.2807	0.9125	0.9953	0.9946	0.0348	0.7193	0.0054	0.37	0.26	TRUE	15.7764
NCU05247.1_25	NCU05247.2	1.01152	1	1.09166	1.06499	0.16291	0.1576	0.17914	0.17581	0.17908	0.18525	0.19192	0.1835	0.12433	0.12433	0.12433	0.12433	0.0557	0.0557	0.0557	0.0557	0.17171	0.17171	0.17171	0.17171	0.5411	0.2414	0.3378	0.4589	0.2409	0.279	0.7586	0.7591	0.5889	0.6622	0.721	0.4111	0.26	0.23	TRUE	6.63591
NCU05337.1_1	NCU05337.2	1.32943	1	1.26595	1.05375	0.27413	0.19869	0.23605	0.2036	0.25645	0.24103	0.2568	0.24705	0.15772	0.15772	0.15772	0.15772	0.06932	0.06932	0.06932	0.06932	0.20695	0.20695	0.20695	0.20695	0.9538	0.6459	0.91	0.0462	0.0852	0.3415	0.3541	0.9148	0.8904	0.09	0.6585	0.1096	0.31	0.28	TRUE	4.17714
NCU05357.1_289	NCU05357.2	1.1423	1	1.30895	1.10246	0.3258	0.28777	0.49788	0.42237	0.33175	0.34208	0.53813	0.56139	0.1889	0.1889	0.1889	0.1889	0.0992	0.0992	0.0992	0.0992	0.38182	0.38182	0.38182	0.38182	0.7651	0.2414	0.5636	0.2349	0.1673	0.2918	0.7586	0.8327	0.7099	0.4364	0.7082	0.2901	0.4	0.36	TRUE	3.45027
NCU05361.1_258	NCU05361.2	1.07602	1	1.14462	1.1236	0.34864	0.345	0.47548	0.57653	0.38009	0.38199	0.6145	0.69214	0.19456	0.19456	0.19456	0.19456	0.11925	0.11925	0.11925	0.11925	0.52177	0.52177	0.52177	0.52177	0.6628	0.3739	0.4418	0.3372	0.3014	0.3248	0.6261	0.6986	0.5233	0.5582	0.6752	0.4767	0.43	0.4	TRUE	4.25438
NCU05431.1_340	NCU05431.2	1.19145	1	1.63332	1.03886	0.136	0.12306	0.17424	0.12443	0.1433	0.13815	0.17027	0.13906	0.08633	0.08633	0.08633	0.08633	0.03832	0.03832	0.03832	0.03832	0.13049	0.13049	0.13049	0.13049	0.9689	0.0037	0.9245	0.0311	0.0013	0.2922	0.9963	0.9987	0.9989	0.0755	0.7078	0.0011	0.18	0.16	TRUE	8.33215
NCU05478.1_671	NCU05478.2	1.26186	1	1.05378	1.22507	0.25589	0.21109	0.21521	0.25067	0.27318	0.23088	0.24608	0.27291	0.16422	0.16422	0.16422	0.16422	0.06972	0.06972	0.06972	0.06972	0.20923	0.20923	0.20923	0.20923	0.9372	0.8875	0.5708	0.0628	0.3676	0.0916	0.1125	0.6324	0.1595	0.4292	0.9084	0.8405	0.32	0.29	TRUE	3.60135
NCU05486.1_15	NCU05486.2	1.16934	1	1.18776	1.0689	0.22535	0.19417	0.23611	0.21643	0.25415	0.21819	0.24957	0.23213	0.15692	0.15692	0.15692	0.15692	0.06935	0.06935	0.06935	0.06935	0.20116	0.20116	0.20116	0.20116	0.8702	0.4552	0.7201	0.1298	0.1426	0.3106	0.5448	0.8574	0.7819	0.2799	0.6894	0.2181	0.31	0.27	TRUE	4.81956
NCU05729.1_44	NCU05729.2	1.26786	1	1.23055	1.19311	0.36886	0.31165	0.40537	0.39659	0.40644	0.35461	0.48579	0.50058	0.23577	0.23577	0.23577	0.23577	0.11008	0.11008	0.11008	0.11008	0.3234	0.3234	0.3234	0.3234	0.8642	0.5687	0.6002	0.1358	0.2197	0.1976	0.4313	0.7803	0.5526	0.3998	0.8024	0.4474	0.43	0.4	TRUE	1.53131
NCU05808.M__NCU05809.M__1_126	ChIP_Chip_233	1.20786	1	1.28211	1.02201	0.18446	0.16246	0.19211	0.16557	0.19875	0.18209	0.20209	0.19491	0.11981	0.11981	0.11981	0.11981	0.05257	0.05257	0.05257	0.05257	0.17619	0.17619	0.17619	0.17619	0.9436	0.2837	0.8951	0.0564	0.0399	0.4043	0.7163	0.9601	0.9621	0.1049	0.5957	0.0379	0.25	0.22	TRUE	5.69593
NCU06175.1_1734	NCU06175.2	1.0673	1	1.17638	1.04429	0.07531	0.07234	0.08006	0.07567	0.07936	0.07614	0.08281	0.07798	0.05257	0.05257	0.05257	0.05257	0.02365	0.02365	0.02365	0.02365	0.075	0.075	0.075	0.075	0.9078	0.0363	0.6634	0.0922	0.0108	0.1743	0.9637	0.9892	0.9802	0.3366	0.8257	0.0198	0.34	0.25	TRUE	12.5827
NCU06178.1_24	NCU06178.2	1.33834	1	1.45142	1.20305	0.47957	0.35053	0.49071	0.40894	0.56912	0.47351	0.56951	0.50697	0.30766	0.30766	0.30766	0.30766	0.12865	0.12865	0.12865	0.12865	0.34684	0.34684	0.34684	0.34684	0.8606	0.3901	0.6349	0.1394	0.1305	0.2503	0.6099	0.8695	0.7599	0.3651	0.7497	0.2401	0.49	0.45	TRUE	-2.23777
NCU06514.1_295	NCU06514.2	1.42373	1	3.10101	1.19299	0.3045	0.24556	0.76825	0.38647	0.31016	0.33267	0.59861	0.58985	0.12769	0.12769	0.12769	0.12769	0.07011	0.07011	0.07011	0.07011	0.31001	0.31001	0.31001	0.31001	0.9694	0.0034	0.8238	0.0306	0.0023	0.1054	0.9966	0.9977	0.9897	0.1762	0.8946	0.0103	0.26	0.28	TRUE	5.30402
NCU06677.1_513	NCU06677.2	1.52521	1	2.08799	1.02176	0.34692	0.24521	0.36968	0.22326	0.34796	0.32154	0.36108	0.26867	0.15005	0.15005	0.15005	0.15005	0.07218	0.07218	0.07218	0.07218	0.25202	0.25202	0.25202	0.25202	0.9728	0.0293	0.9705	0.0272	0.0035	0.4284	0.9707	0.9965	0.997	0.0295	0.5716	0.003	0.3	0.28	TRUE	4.26183
NCU06692.1_8	NCU06692.2	1.03506	1	1.21492	1.03852	0.17748	0.17315	0.20394	0.17778	0.18898	0.20285	0.21696	0.19484	0.13109	0.13109	0.13109	0.13109	0.05838	0.05838	0.05838	0.05838	0.18586	0.18586	0.18586	0.18586	0.6259	0.1021	0.4964	0.3741	0.0937	0.3755	0.8979	0.9063	0.8978	0.5036	0.6245	0.1022	0.27	0.24	TRUE	5.36595
NCU06800.1_148	NCU06800.2	2.29627	1	2.51563	1.07252	0.60923	0.30559	0.89809	0.48383	0.5073	0.42733	0.67678	0.97249	0.14226	0.14226	0.14226	0.14226	0.09045	0.09045	0.09045	0.09045	0.47755	0.47755	0.47755	0.47755	0.9948	0.2571	0.9655	0.0052	0.0117	0.3497	0.7429	0.9883	0.963	0.0345	0.6503	0.037	0.34	0.33	TRUE	5.49749
NCU06802.1_186	NCU06802.2	1.28269	1	1.19268	1.06984	0.35992	0.28007	0.28608	0.25848	0.36558	0.35226	0.31649	0.30985	0.18392	0.18392	0.18392	0.18392	0.08766	0.08766	0.08766	0.08766	0.29191	0.29191	0.29191	0.29191	0.8727	0.6695	0.8035	0.1273	0.196	0.3379	0.3305	0.804	0.7395	0.1965	0.6621	0.2605	0.37	0.33	TRUE	1.79813
NCU06805.1_332	NCU06805.2	1.21408	1	1.25004	1.05388	0.16794	0.14517	0.16083	0.14689	0.18077	0.15277	0.17873	0.15879	0.10397	0.10397	0.10397	0.10397	0.04641	0.04641	0.04641	0.04641	0.15227	0.15227	0.15227	0.15227	0.9664	0.3666	0.8926	0.0336	0.0341	0.2748	0.6334	0.9659	0.954	0.1074	0.7252	0.046	0.22	0.2	TRUE	7.72527
NCU06814.1_218	NCU06814.2	1.24086	1	1.28982	1.07301	0.46004	0.40311	0.5276	0.50764	0.51568	0.58101	0.59523	0.76114	0.30477	0.30477	0.30477	0.30477	0.14879	0.14879	0.14879	0.14879	0.46998	0.46998	0.46998	0.46998	0.7806	0.4492	0.6497	0.2194	0.2392	0.411	0.5508	0.7608	0.7002	0.3503	0.589	0.2998	0.23	0.5	TRUE	0.790652
NCU06819.1_116	NCU06819.2	1.14834	1	1.12138	1.04509	0.2464	0.23116	0.24773	0.24678	0.28234	0.25713	0.28234	0.27865	0.18557	0.18557	0.18557	0.18557	0.08083	0.08083	0.08083	0.08083	0.23544	0.23544	0.23544	0.23544	0.8018	0.5551	0.7015	0.1982	0.2684	0.3882	0.4449	0.7316	0.6701	0.2985	0.6118	0.3299	0.35	0.32	TRUE	1.04513
NCU06831.1_219	NCU06831.2	1.12547	1	1.24382	1.18041	0.24527	0.22203	0.25396	0.25922	0.27474	0.24554	0.2879	0.27596	0.16827	0.16827	0.16827	0.16827	0.07486	0.07486	0.07486	0.07486	0.22468	0.22468	0.22468	0.22468	0.7878	0.2441	0.3898	0.2122	0.1118	0.1443	0.7559	0.8882	0.6457	0.6102	0.8557	0.3543	0.32	0.29	TRUE	4.32167
NCU07049.1_673	NCU07049.2	1.08786	1	1.16112	1.03346	0.29899	0.28541	0.33083	0.29624	0.33761	0.33068	0.38994	0.36374	0.23973	0.23973	0.23973	0.23973	0.10275	0.10275	0.10275	0.10275	0.29642	0.29642	0.29642	0.29642	0.6597	0.3806	0.5915	0.3403	0.274	0.4321	0.6194	0.726	0.698	0.4085	0.5679	0.302	0.42	0.38	TRUE	-0.221271
NCU07054.1_1086	NCU07054.2	1.92518	1	1.10465	1.10345	0.76763	0.43331	0.56469	0.63771	0.64712	0.5746	0.73385	1.14269	0.2867	0.2867	0.2867	0.2867	0.16051	0.16051	0.16051	0.16051	0.58925	0.58925	0.58925	0.58925	0.9645	0.9591	0.8692	0.0355	0.3982	0.3939	0.0409	0.6018	0.5076	0.1308	0.6061	0.4924	0.34	0.47	TRUE	1.46605
NCU07093.1_22	NCU07093.2	1.0307	1	1.15352	1.00153	0.058	0.06625	0.09449	0.09382	0.06451	0.06114	0.09988	0.0972	0.03007	0.03007	0.03007	0.03007	0.0167	0.0167	0.0167	0.0167	0.10242	0.10242	0.10242	0.10242	0.8322	0.0178	0.755	0.1678	0.0199	0.4714	0.9822	0.9801	0.9656	0.245	0.5286	0.0344	0.15	0.22	TRUE	14.843
NCU07143.1_1026	NCU07143.2	20.0721	1	96.8203	2.17533	7.09156	0.43576	13.5733	0.86025	12.2941	1.09909	7.53052	2.38905	0.29624	0.29624	0.29624	0.29624	0.1292	0.1292	0.1292	0.1292	0.35259	0.35259	0.35259	0.35259	1	0	1	0	0	0.0168	1	1	1	0	0.9832	0	0.29	0.44	TRUE	-0.7464
NCU07263.1__1_247	ChIP_Chip_273	1.03789	1	1.03089	1.2849	0.21528	0.1936	0.20426	0.2439	0.22611	0.22883	0.22881	0.25053	0.15862	0.15862	0.15862	0.15862	0.06895	0.06895	0.06895	0.06895	0.20532	0.20532	0.20532	0.20532	0.6098	0.516	0.1053	0.3902	0.4201	0.0545	0.484	0.5799	0.0738	0.8947	0.9455	0.9262	0.31	0.28	TRUE	4.54055
NCU07263.M__NCU07264.M__1_171	ChIP_Chip_274	1.21924	1	1.04531	1.01348	0.37099	0.32118	0.32268	0.33219	0.4085	0.36918	0.40737	0.4233	0.27611	0.27611	0.27611	0.27611	0.11601	0.11601	0.11601	0.11601	0.31781	0.31781	0.31781	0.31781	0.7975	0.751	0.7401	0.2025	0.4278	0.4662	0.249	0.5722	0.558	0.2599	0.5338	0.442	0.46	0.42	TRUE	-3.12733
NCU07267.M__NCU07268.M__1_347	ChIP_Chip_282	1.19376	1	1.12711	1.12989	0.26569	0.25263	0.27845	0.31481	0.27396	0.29817	0.29317	0.37005	0.14656	0.14656	0.14656	0.14656	0.0786	0.0786	0.0786	0.0786	0.32133	0.32133	0.32133	0.32133	0.8855	0.6724	0.6288	0.1145	0.2371	0.2388	0.3276	0.7629	0.496	0.3712	0.7612	0.504	0.34	0.31	TRUE	4.96668
NCU07303.1_137	NCU07303.2	1.15253	1	1.28223	1.10266	0.19075	0.17383	0.20661	0.17968	0.1999	0.18584	0.21718	0.20937	0.12379	0.12379	0.12379	0.12379	0.05494	0.05494	0.05494	0.05494	0.18991	0.18991	0.18991	0.18991	0.8901	0.162	0.6338	0.1099	0.043	0.1783	0.838	0.957	0.889	0.3662	0.8217	0.111	0.26	0.23	TRUE	6.71379
NCU07490.1_0	NCU07490.2	1.45757	1	1.18797	1.05285	0.61255	0.45145	0.64923	0.66451	0.64796	0.6123	0.79772	1.1776	0.32607	0.32607	0.32607	0.32607	0.17907	0.17907	0.17907	0.17907	0.63919	0.63919	0.63919	0.63919	0.8657	0.7727	0.7484	0.1343	0.3494	0.4522	0.2273	0.6506	0.598	0.2516	0.5478	0.402	0.16	0.44	TRUE	0.58527
NCU07696.1_66	NCU07696.2	1.60579	1	1.65099	1.99115	0.80601	0.43981	0.71984	0.74746	1.10177	0.67583	0.83415	0.78684	0.31547	0.31547	0.31547	0.31547	0.155	0.155	0.155	0.155	0.50718	0.50718	0.50718	0.50718	0.8737	0.4533	0.2877	0.1263	0.1045	0.018	0.5467	0.8955	0.2411	0.7123	0.982	0.7589	0.17	0.23	TRUE	-1.76596
NCU07809.1_217	NCU07809.2	1.13673	1	1.1434	1.08816	0.31192	0.28447	0.31982	0.30565	0.35418	0.33859	0.3814	0.37073	0.24186	0.24186	0.24186	0.24186	0.10448	0.10448	0.10448	0.10448	0.29884	0.29884	0.29884	0.29884	0.733	0.4877	0.568	0.267	0.2828	0.3403	0.5123	0.7172	0.5916	0.432	0.6597	0.4084	0.42	0.38	TRUE	1.55929
NCU08010.1_72	NCU08010.2	1.06727	1	1.0738	1.12585	0.15401	0.14382	0.15685	0.1541	0.16015	0.15431	0.15947	0.16799	0.10617	0.10617	0.10617	0.10617	0.04806	0.04806	0.04806	0.04806	0.15084	0.15084	0.15084	0.15084	0.7591	0.4693	0.2973	0.2409	0.2523	0.1153	0.5307	0.7477	0.2884	0.7027	0.8847	0.7116	0.22	0.2	TRUE	7.69739
NCU08304.1_67	NCU08304.2	1.27425	1	1.31685	1.15886	0.30906	0.27043	0.43973	0.40342	0.3169	0.28335	0.53086	0.48687	0.15185	0.15185	0.15185	0.15185	0.08361	0.08361	0.08361	0.08361	0.33698	0.33698	0.33698	0.33698	0.9162	0.4111	0.6742	0.0838	0.1198	0.1671	0.5889	0.8802	0.6905	0.3258	0.8329	0.3095	0.34	0.32	TRUE	5.17203
NCU08333.1_499	NCU08333.2	1.15465	1	1.09084	1.05814	0.14123	0.12443	0.13247	0.13857	0.14776	0.14392	0.14264	0.14381	0.09169	0.09169	0.09169	0.09169	0.0409	0.0409	0.0409	0.0409	0.14217	0.14217	0.14217	0.14217	0.9362	0.7683	0.8247	0.0638	0.1819	0.2447	0.2317	0.8181	0.6508	0.1753	0.7553	0.3492	0.2	0.17	TRUE	9.01627
NCU08407.M__NCU08408.M__1_389	ChIP_Chip_285	1.09335	1	1.09588	1.06472	0.21043	0.19797	0.20921	0.20614	0.22398	0.22236	0.22747	0.22979	0.15363	0.15363	0.15363	0.15363	0.06791	0.06791	0.06791	0.06791	0.20597	0.20597	0.20597	0.20597	0.7581	0.4947	0.5746	0.2419	0.2715	0.316	0.5053	0.7285	0.5928	0.4254	0.684	0.4072	0.3	0.27	TRUE	4.95414
NCU08408.M__NCU08409.M__1_559	ChIP_Chip_288	1.24978	1	1.31998	1.29805	0.61814	0.49053	0.70546	0.65534	0.98271	0.66938	1.01141	0.77813	0.42678	0.42678	0.42678	0.42678	0.19662	0.19662	0.19662	0.19662	0.62166	0.62166	0.62166	0.62166	0.7092	0.4472	0.4748	0.2908	0.2987	0.2332	0.5528	0.7013	0.5001	0.5252	0.7668	0.4999	0.22	0.34	TRUE	-2.60399
NCU08460.1_38	NCU08460.2	2.1971	1	1.7304	1.03307	1.07349	0.71113	1.02249	0.75267	1.32149	1.04521	1.36447	1.36302	0.50662	0.50662	0.50662	0.50662	0.22342	0.22342	0.22342	0.22342	0.698	0.698	0.698	0.698	0.898	0.7357	0.8546	0.102	0.2366	0.4759	0.2643	0.7634	0.7376	0.1454	0.5241	0.2624	0.24	0.32	TRUE	-3.63515
NCU08462.1_150	NCU08462.2	1.0784	1	1.19861	1.01346	0.15516	0.15003	0.16479	0.14882	0.16456	0.15964	0.17534	0.15301	0.10509	0.10509	0.10509	0.10509	0.04747	0.04747	0.04747	0.04747	0.15889	0.15889	0.15889	0.15889	0.796	0.1375	0.7271	0.204	0.0662	0.4397	0.8625	0.9338	0.9453	0.2729	0.5603	0.0547	0.23	0.2	TRUE	6.65093
NCU08481.1_153	NCU08481.1	1.15948	1	1.252	1.07735	0.18732	0.16514	0.20792	0.19273	0.21895	0.18897	0.21893	0.1916	0.12822	0.12822	0.12822	0.12822	0.05766	0.05766	0.05766	0.05766	0.18143	0.18143	0.18143	0.18143	0.8982	0.2482	0.7241	0.1018	0.0614	0.2491	0.7518	0.9386	0.9016	0.2759	0.7509	0.0984	0.26	0.23	TRUE	5.55941
NCU08573.1_280	NCU08573.2	1.95566	1	3.92402	1.07096	0.31763	0.20739	0.47584	0.20195	0.35341	0.27283	0.38772	0.26659	0.11191	0.11191	0.11191	0.11191	0.05358	0.05358	0.05358	0.05358	0.20938	0.20938	0.20938	0.20938	0.9988	0.0006	0.9975	0.0012	0	0.2785	0.9994	1	1	0.0025	0.7215	0	0.21	0.23	TRUE	6.1575
NCU08583.1_0	NCU08583.2	1.15121	1	1.06482	1.00738	0.35298	0.34532	0.33315	0.35408	0.41483	0.41236	0.40825	0.44316	0.25694	0.25694	0.25694	0.25694	0.1157	0.1157	0.1157	0.1157	0.36584	0.36584	0.36584	0.36584	0.7469	0.6302	0.6883	0.2531	0.4125	0.485	0.3698	0.5875	0.5977	0.3117	0.515	0.4023	0.46	0.42	TRUE	0.958381
NCU08725.1_9	NCU08725.2	1.05937	1	1.18382	1.08903	0.1841	0.17318	0.20791	0.18513	0.20278	0.1927	0.20241	0.21254	0.13432	0.13432	0.13432	0.13432	0.05879	0.05879	0.05879	0.05879	0.19573	0.19573	0.19573	0.19573	0.6976	0.1805	0.4161	0.3024	0.1218	0.2295	0.8195	0.8782	0.7577	0.5839	0.7705	0.2423	0.27	0.24	TRUE	5.83824
NCU08824.1_792	NCU08824.2	1.06994	1	1.20609	1.08127	0.25926	0.23263	0.26931	0.24966	0.29871	0.28055	0.29741	0.26645	0.18796	0.18796	0.18796	0.18796	0.08353	0.08353	0.08353	0.08353	0.24112	0.24112	0.24112	0.24112	0.6657	0.2381	0.4807	0.3343	0.1673	0.3084	0.7619	0.8327	0.7518	0.5193	0.6916	0.2482	0.35	0.32	TRUE	2.93616
NCU09069.1_790	NCU09069.1	2.13673	1	1.23667	1.03654	1.00454	0.65304	0.63704	0.73839	0.98651	1.26102	0.86143	1.55236	0.45976	0.45976	0.45976	0.45976	0.23277	0.23277	0.23277	0.23277	0.80253	0.80253	0.80253	0.80253	0.9227	0.9117	0.8535	0.0773	0.3575	0.4809	0.0883	0.6425	0.6461	0.1465	0.5191	0.3539	0.46	0.22	TRUE	-1.97358
NCU09110.1_27	NCU09110.2	1.12749	1	1.19004	1.04147	0.20422	0.17697	0.21162	0.18989	0.21289	0.20084	0.21969	0.20664	0.13892	0.13892	0.13892	0.13892	0.06127	0.06127	0.06127	0.06127	0.19519	0.19519	0.19519	0.19519	0.834	0.3184	0.7169	0.166	0.1196	0.3695	0.6816	0.8804	0.8592	0.2831	0.6305	0.1408	0.28	0.25	TRUE	4.28257
NCU09223.1_1366	NCU09223.2	2.75552	1	5.9449	1.19219	0.51589	0.22093	0.78172	0.23325	0.57986	0.31268	0.62108	0.32645	0.13886	0.13886	0.13886	0.13886	0.06201	0.06201	0.06201	0.06201	0.20153	0.20153	0.20153	0.20153	1	0.0007	0.999	0	0	0.0891	0.9993	1	1	0.001	0.9109	0	0.2	0.25	TRUE	5.00923
NCU09300.M__NCU09301.M__3_452	ChIP_Chip_297	1.35692	1	1.22156	1.12806	0.59365	0.43636	0.61735	0.55504	0.54891	0.54548	0.69961	0.84798	0.2313	0.2313	0.2313	0.2313	0.13785	0.13785	0.13785	0.13785	0.55984	0.55984	0.55984	0.55984	0.8181	0.6869	0.6924	0.1819	0.3015	0.2896	0.3131	0.6985	0.5782	0.3076	0.7104	0.4218	0.46	0.45	TRUE	2.2222
NCU09301.M__NCU09302.M__2_482_RevCom	ChIP_Chip_304	1.54186	1	1.18816	1.16063	0.79768	0.5535	0.7324	0.82807	0.85429	0.82332	1.01467	1.43424	0.44177	0.44177	0.44177	0.44177	0.22918	0.22918	0.22918	0.22918	0.84422	0.84422	0.84422	0.84422	0.8093	0.769	0.6712	0.1907	0.3914	0.3939	0.231	0.6086	0.5157	0.3288	0.6061	0.4843	0.3	0.4	TRUE	-1.91763
NCU09305.M__NCU09306.M__1_405	ChIP_Chip_316	2.67447	1	4.36836	2.17074	1.19511	0.56298	1.82317	1.34743	1.44553	1.33496	1.35902	2.41589	0.30404	0.30404	0.30404	0.30404	0.17082	0.17082	0.17082	0.17082	0.67459	0.67459	0.67459	0.67459	0.9832	0.0749	0.679	0.0168	0.0106	0.1207	0.9251	0.9894	0.9297	0.321	0.8793	0.0703	0.49	0.21	TRUE	2.2155
NCU09491.M__NCU09492.M__2_657	ChIP_Chip_320	1.6442	1	1.26342	1.04688	0.42585	0.33813	0.35785	0.33289	0.45564	0.42113	0.38919	0.42091	0.22229	0.22229	0.22229	0.22229	0.1057	0.1057	0.1057	0.1057	0.33178	0.33178	0.33178	0.33178	0.9736	0.9014	0.95	0.0264	0.1747	0.4231	0.0986	0.8253	0.8292	0.05	0.5769	0.1708	0.41	0.38	TRUE	2.13058
NCU09491.M__NCU09492.M__4_366	ChIP_Chip_322	1.15799	1	1.09549	1.04785	0.18791	0.16974	0.1937	0.19193	0.18847	0.17096	0.21728	0.21751	0.11255	0.11255	0.11255	0.11255	0.0544	0.0544	0.0544	0.0544	0.20615	0.20615	0.20615	0.20615	0.907	0.712	0.7863	0.093	0.2298	0.315	0.288	0.7702	0.6532	0.2137	0.685	0.3468	0.25	0.23	TRUE	6.95002
NCU09491.M__NCU09492.M__7_355_RevCom	ChIP_Chip_325	1.18158	1	1.23106	1.03715	0.3181	0.28675	0.33001	0.29573	0.35251	0.34517	0.40693	0.37489	0.23983	0.23983	0.23983	0.23983	0.10151	0.10151	0.10151	0.10151	0.28558	0.28558	0.28558	0.28558	0.792	0.4127	0.7103	0.208	0.1991	0.4236	0.5873	0.8009	0.7814	0.2897	0.5764	0.2186	0.42	0.38	TRUE	1.69357
NCU09554.1_41	NCU09554.1	1.12729	1	1.26134	1.00205	0.19892	0.18851	0.22733	0.18093	0.22069	0.20508	0.22484	0.21818	0.14099	0.14099	0.14099	0.14099	0.06226	0.06226	0.06226	0.06226	0.19546	0.19546	0.19546	0.19546	0.8237	0.1824	0.7908	0.1763	0.072	0.4934	0.8176	0.928	0.9438	0.2092	0.5066	0.0562	0.28	0.25	TRUE	5.70577
NCU09639.1__1_136	ChIP_Chip_360	1.20251	1	1.06778	1.05068	0.36955	0.31665	0.3558	0.3645	0.41481	0.38879	0.42923	0.44739	0.25372	0.25372	0.25372	0.25372	0.11528	0.11528	0.11528	0.11528	0.37419	0.37419	0.37419	0.37419	0.7785	0.7136	0.6878	0.2215	0.4082	0.4151	0.2864	0.5918	0.5202	0.3122	0.5849	0.4798	0.46	0.42	TRUE	1.18132
NCU09661.1_148	NCU09661.2	1.43953	1	1.72332	1.23783	0.60029	0.52719	0.70823	0.73415	0.6083	0.86282	0.69893	1.10317	0.2838	0.2838	0.2838	0.2838	0.16475	0.16475	0.16475	0.16475	0.64119	0.64119	0.64119	0.64119	0.8835	0.2359	0.6465	0.1165	0.1007	0.3355	0.7641	0.8993	0.815	0.3535	0.6645	0.185	0.25	0.2	TRUE	2.28538
NCU09697.1_77	NCU09697.2	1.11334	1	1.11518	1.0262	0.28607	0.26866	0.27638	0.28026	0.31651	0.3104	0.3443	0.31133	0.21963	0.21963	0.21963	0.21963	0.09471	0.09471	0.09471	0.09471	0.2692	0.2692	0.2692	0.2692	0.7213	0.4947	0.6508	0.2787	0.3073	0.4526	0.5053	0.6927	0.6709	0.3492	0.5474	0.3291	0.4	0.35	TRUE	2.40874
NCU09838.1_459	NCU09838.2	1.1878	1	1.25617	1.44906	0.68137	0.60544	0.84662	0.97521	0.93972	0.81025	1.34325	1.26004	0.48057	0.48057	0.48057	0.48057	0.23751	0.23751	0.23751	0.23751	0.86076	0.86076	0.86076	0.86076	0.6402	0.4669	0.3869	0.3598	0.3708	0.2025	0.5331	0.6292	0.4298	0.6131	0.7975	0.5702	0.19	0.26	TRUE	-3.31615
NCU09905.1_6	NCU09905.2	1.83465	1	1.28672	1.40832	1.07458	0.65726	0.96825	1.04644	1.36881	1.12775	1.88433	1.81603	0.62847	0.62847	0.62847	0.62847	0.2937	0.2937	0.2937	0.2937	1.06633	1.06633	1.06633	1.06633	0.8475	0.7231	0.6314	0.1525	0.3893	0.3268	0.2769	0.6107	0.4638	0.3686	0.6732	0.5362	0.3	0.44	TRUE	-2.79032
NCU09927.1_28	NCU09927.2	1.08938	1	1.01056	1.08493	0.18924	0.17321	0.18123	0.18171	0.20111	0.19584	0.1887	0.19934	0.13744	0.13744	0.13744	0.13744	0.06077	0.06077	0.06077	0.06077	0.19127	0.19127	0.19127	0.19127	0.7677	0.7447	0.5088	0.2323	0.4663	0.2451	0.2553	0.5337	0.2694	0.4912	0.7549	0.7306	0.28	0.24	TRUE	5.78798
NCU09934.1_194	NCU09934.2	1.12281	1	1.2194	1.03422	0.13727	0.13081	0.14805	0.13599	0.15023	0.13201	0.15012	0.13773	0.09176	0.09176	0.09176	0.09176	0.04072	0.04072	0.04072	0.04072	0.14074	0.14074	0.14074	0.14074	0.9134	0.1617	0.8125	0.0866	0.0363	0.3375	0.8383	0.9637	0.9573	0.1875	0.6625	0.0427	0.2	0.17	TRUE	7.76635
NCU09945.1_12	NCU09945.2	1.18233	1	1.23625	1.0962	0.47746	0.41337	0.53731	0.44548	0.61885	0.54567	0.7039	0.61158	0.36325	0.36325	0.36325	0.36325	0.15734	0.15734	0.15734	0.15734	0.46542	0.46542	0.46542	0.46542	0.6927	0.4484	0.5862	0.3073	0.305	0.3689	0.5516	0.695	0.6218	0.4138	0.6311	0.3782	0.15	0.21	TRUE	-1.62687
NCU10034.1_308	NCU10034.2	1.00683	1	1.05274	1.0115	0.23853	0.24287	0.25527	0.24401	0.27379	0.28153	0.28352	0.2875	0.19684	0.19684	0.19684	0.19684	0.08513	0.08513	0.08513	0.08513	0.25096	0.25096	0.25096	0.25096	0.5233	0.3879	0.4856	0.4767	0.3987	0.4736	0.6121	0.6013	0.5932	0.5144	0.5264	0.4068	0.36	0.33	TRUE	0.721018
NCU10041.1_128	NCU10041.2	1.23848	1	1.16999	1.03009	0.28366	0.20835	0.2688	0.21151	0.31207	0.24184	0.28474	0.23643	0.14969	0.14969	0.14969	0.14969	0.07265	0.07265	0.07265	0.07265	0.245	0.245	0.245	0.245	0.9156	0.6379	0.8548	0.0844	0.1805	0.4115	0.3621	0.8195	0.8242	0.1452	0.5885	0.1758	0.32	0.28	TRUE	5.03124
NCU10044.1_708	NCU10044.2	1.07061	1	1.12575	1.0643	0.15345	0.14659	0.15898	0.14945	0.15684	0.15472	0.16396	0.15792	0.11008	0.11008	0.11008	0.11008	0.04871	0.04871	0.04871	0.04871	0.14985	0.14985	0.14985	0.14985	0.7684	0.2923	0.5241	0.2316	0.1469	0.254	0.7077	0.8531	0.7223	0.4759	0.746	0.2777	0.23	0.2	TRUE	7.33821
NCU10045.1_812	NCU10045.2	2.37544	1	2.3818	1.10241	0.41815	0.21562	0.41723	0.24461	0.43738	0.28787	0.41122	0.30126	0.15983	0.15983	0.15983	0.15983	0.06939	0.06939	0.06939	0.06939	0.21305	0.21305	0.21305	0.21305	0.9997	0.4853	0.9985	0.0003	0.0009	0.2447	0.5147	0.9991	0.999	0.0015	0.7553	0.001	0.28	0.28	TRUE	4.73552
NCU10049.1_392	NCU10049.2	1.52913	1	1.07651	1.03232	0.45711	0.299	0.37905	0.33243	0.46543	0.35769	0.49141	0.41664	0.21186	0.21186	0.21186	0.21186	0.11002	0.11002	0.11002	0.11002	0.38944	0.38944	0.38944	0.38944	0.958	0.9087	0.9195	0.042	0.3817	0.4285	0.0913	0.6183	0.5688	0.0805	0.5715	0.4312	0.41	0.4	TRUE	3.15976
NCU10052.1_1924	NCU10052.2	1.59216	1	1.34922	1.11556	0.56194	0.34324	0.49497	0.36539	0.6242	0.4496	0.60602	0.49954	0.28129	0.28129	0.28129	0.28129	0.12778	0.12778	0.12778	0.12778	0.36748	0.36748	0.36748	0.36748	0.948	0.715	0.8704	0.052	0.1715	0.3251	0.285	0.8285	0.7622	0.1296	0.6749	0.2378	0.47	0.45	TRUE	-2.42597
NCU10055.1_676	NCU10055.2	1.46764	1	1.85609	1.08276	0.19173	0.15563	0.26873	0.18272	0.20401	0.17987	0.26505	0.20788	0.09281	0.09281	0.09281	0.09281	0.04517	0.04517	0.04517	0.04517	0.18928	0.18928	0.18928	0.18928	0.9944	0.0247	0.981	0.0056	0.0025	0.183	0.9753	0.9975	0.9976	0.019	0.817	0.0024	0.21	0.2	TRUE	7.91833
NCU10073.1_2339	NCU10073.2	1.10535	1	1.04791	1.1737	0.09435	0.08678	0.08543	0.09403	0.09425	0.08741	0.09082	0.10238	0.06171	0.06171	0.06171	0.06171	0.02736	0.02736	0.02736	0.02736	0.09464	0.09464	0.09464	0.09464	0.9459	0.8301	0.1675	0.0541	0.2281	0.0124	0.1699	0.7719	0.0329	0.8325	0.9876	0.9671	0.5	0.37	TRUE	11.3133
ret-1_Panama_2720	NCU03494.2_PA	1.13563	1	1.18108	1.0232	0.25893	0.23131	0.26849	0.24613	0.26652	0.27171	0.29113	0.29327	0.18323	0.18323	0.18323	0.18323	0.07918	0.07918	0.07918	0.07918	0.23618	0.23618	0.23618	0.23618	0.7881	0.3921	0.7147	0.2119	0.1904	0.4423	0.6079	0.8096	0.8091	0.2853	0.5577	0.1909	0.35	0.31	TRUE	3.62113
Spot3_half	Spot3_half	1.14545	1	1.14107	1.16339	0.17443	0.16404	0.18237	0.17665	0.1887	0.1772	0.1881	0.19425	0.11729	0.11729	0.11729	0.11729	0.05288	0.05288	0.05288	0.05288	0.17278	0.17278	0.17278	0.17278	0.8951	0.5173	0.4501	0.1049	0.143	0.0871	0.4827	0.857	0.4187	0.5499	0.9129	0.5813	0.25	0.22	TRUE	6.05169
Spot7_half	Spot7_half	1.186	1	1.13792	1.41757	0.53217	0.5301	0.45771	0.59588	0.65777	0.66455	0.61097	0.88218	0.42957	0.42957	0.42957	0.42957	0.17556	0.17556	0.17556	0.17556	0.42493	0.42493	0.42493	0.42493	0.6883	0.5532	0.3372	0.3117	0.3738	0.2072	0.4468	0.6262	0.2668	0.6628	0.7928	0.7332	0.41	0.36	TRUE	-4.63899
TelVIIL_NCU09306.1__1_412	ChIP_Chip_378	1.1025	1	1.21514	1.02378	0.17554	0.16163	0.18403	0.16621	0.18299	0.18569	0.1969	0.18958	0.12179	0.12179	0.12179	0.12179	0.05447	0.05447	0.05447	0.05447	0.1703	0.1703	0.1703	0.1703	0.8183	0.1793	0.7278	0.1817	0.0734	0.404	0.8207	0.9266	0.9249	0.2722	0.596	0.0751	0.25	0.22	TRUE	6.44158
TelVR_NCU07144.1__1_362	ChIP_Chip_381	1.1639	1	1.38073	1.0329	0.34421	0.3087	0.45057	0.34645	0.41487	0.38994	0.49279	0.4372	0.24322	0.24322	0.24322	0.24322	0.11034	0.11034	0.11034	0.11034	0.35527	0.35527	0.35527	0.35527	0.7632	0.2244	0.6752	0.2368	0.1262	0.4329	0.7756	0.8738	0.855	0.3248	0.5671	0.145	0.44	0.41	TRUE	2.17122
TelVR_NCU07144.1__4_200_RevCom	ChIP_Chip_384	1.46551	1	1.34466	1.03334	0.45875	0.35998	0.46435	0.41329	0.45383	0.46571	0.51182	0.62417	0.24208	0.24208	0.24208	0.24208	0.12285	0.12285	0.12285	0.12285	0.44891	0.44891	0.44891	0.44891	0.927	0.6524	0.8687	0.073	0.1501	0.4615	0.3476	0.8499	0.8233	0.1313	0.5385	0.1767	0.46	0.43	TRUE	2.07982
x4g11_010_743	NCU04657.2	1.26205	1	1.09455	1.00187	0.31587	0.25215	0.26788	0.25457	0.31252	0.30745	0.30965	0.31541	0.20291	0.20291	0.20291	0.20291	0.08721	0.08721	0.08721	0.08721	0.25234	0.25234	0.25234	0.25234	0.8829	0.7945	0.8542	0.1171	0.3251	0.4946	0.2055	0.6749	0.6861	0.1458	0.5054	0.3139	0.37	0.34	TRUE	2.74844
x4g11_040_1117	NCU04662.2	1.17057	1	1.14681	1.07537	0.29928	0.28579	0.30285	0.30026	0.35767	0.32639	0.34831	0.35627	0.22623	0.22623	0.22623	0.22623	0.0963	0.0963	0.0963	0.0963	0.27776	0.27776	0.27776	0.27776	0.7941	0.5447	0.6518	0.2059	0.2744	0.354	0.4553	0.7256	0.6327	0.3482	0.646	0.3673	0.4	0.37	TRUE	-0.998422
x4g11_090_1447	NCU04670.2	1.55212	1	1.02885	1.00696	0.71	0.50401	0.5963	0.6825	0.71699	0.69599	0.87731	1.2176	0.37881	0.37881	0.37881	0.37881	0.19919	0.19919	0.19919	0.19919	0.73212	0.73212	0.73212	0.73212	0.8651	0.8855	0.7734	0.1349	0.4806	0.5035	0.1145	0.5194	0.5123	0.2266	0.4965	0.4877	0.5	0.17	TRUE	-0.499845
x4g11_130_2506	NCU04674.2	2.54713	1	1.40756	12.3646	0.58844	0.2135	0.30349	1.17991	0.86279	0.30815	0.41447	0.81903	0.14377	0.14377	0.14377	0.14377	0.06463	0.06463	0.06463	0.06463	0.20217	0.20217	0.20217	0.20217	0.9992	0.9982	0	0.0008	0.0275	0	0.0018	0.9725	0	1	1	1	0.43	0.26	TRUE	4.35994
x4g11_140_533	NCU04675.2	1.23977	1	1.77182	1.80429	0.30682	0.21489	0.35875	0.33888	0.352	0.25799	0.37331	0.3383	0.14793	0.14793	0.14793	0.14793	0.07064	0.07064	0.07064	0.07064	0.24868	0.24868	0.24868	0.24868	0.9147	0.0359	0.0337	0.0853	0.0076	0.0029	0.9641	0.9924	0.4452	0.9663	0.9971	0.5548	0.3	0.28	TRUE	4.411
xnc010_070_733	NCU04857.2	1.33708	1	1.3044	1.13534	0.28312	0.22405	0.2817	0.24649	0.30545	0.26442	0.29498	0.29386	0.17434	0.17434	0.17434	0.17434	0.07652	0.07652	0.07652	0.07652	0.23407	0.23407	0.23407	0.23407	0.9512	0.5609	0.815	0.0488	0.0821	0.2008	0.4391	0.9179	0.812	0.185	0.7992	0.188	0.33	0.3	TRUE	3.39088
xnc010_130_7558	NCU04865.2	1.04688	1	1.13946	1.01701	0.0739	0.0676	0.07785	0.0749	0.0777	0.07459	0.07881	0.07676	0.0513	0.0513	0.0513	0.0513	0.0231	0.0231	0.0231	0.0231	0.07474	0.07474	0.07474	0.07474	0.84	0.0507	0.7113	0.16	0.0248	0.3425	0.9493	0.9752	0.9752	0.2887	0.6575	0.0248	0.29	0.37	TRUE	13.1027
xnc018_030_1654	NCU04886.2	1.25721	1	1.21802	1.07416	0.22633	0.18846	0.21954	0.20263	0.23892	0.21779	0.23117	0.2264	0.14317	0.14317	0.14317	0.14317	0.06256	0.06256	0.06256	0.06256	0.19738	0.19738	0.19738	0.19738	0.9419	0.6036	0.8531	0.0581	0.1016	0.2745	0.3964	0.8984	0.8335	0.1469	0.7255	0.1665	0.28	0.26	TRUE	5.4243
xnc020_170_1771	NCU04903.2	1.11979	1	1.21079	1.02911	0.11749	0.10808	0.12234	0.11038	0.11784	0.11255	0.12566	0.12031	0.07643	0.07643	0.07643	0.07643	0.03457	0.03457	0.03457	0.03457	0.11355	0.11355	0.11355	0.11355	0.9312	0.1415	0.8485	0.0688	0.0248	0.3277	0.8585	0.9752	0.9737	0.1515	0.6723	0.0263	0.17	0.15	TRUE	10.3985
xnc030_010_965	NCU04905.2	2.33982	1	2.78046	1.21068	0.20698	0.11138	0.23087	0.13077	0.20929	0.12393	0.22628	0.14706	0.0684	0.0684	0.0684	0.0684	0.03052	0.03052	0.03052	0.03052	0.10831	0.10831	0.10831	0.10831	1	0.0186	1	0	0	0.0114	0.9814	1	1	0	0.9886	0	0.27	0.44	TRUE	10.6234
xnc030_060_756	NCU04909.2	1.50873	1	1.24606	1.08234	0.23799	0.16714	0.20525	0.18608	0.23895	0.18685	0.20739	0.21182	0.12768	0.12768	0.12768	0.12768	0.05681	0.05681	0.05681	0.05681	0.17343	0.17343	0.17343	0.17343	0.9941	0.9443	0.979	0.0059	0.0645	0.238	0.0557	0.9355	0.8817	0.021	0.762	0.1183	0.25	0.23	TRUE	6.19737
xnc030_070_691	NCU04910.2	5.53589	1	4.74061	1.03041	0.71495	0.19498	0.68161	0.19914	0.68668	0.26002	0.67891	0.25965	0.12246	0.12246	0.12246	0.12246	0.05445	0.05445	0.05445	0.05445	0.18474	0.18474	0.18474	0.18474	1	0.9013	1	0	0	0.3858	0.0987	1	1	0	0.6142	0	0.17	0.23	TRUE	5.90592
xnc030_080_2223	NCU04911.2	1.08425	1	1.1842	1.00657	0.15568	0.16333	0.15581	0.16591	0.15942	0.16748	0.16593	0.17509	0.09253	0.09253	0.09253	0.09253	0.04489	0.04489	0.04489	0.04489	0.19248	0.19248	0.19248	0.19248	0.8255	0.1547	0.7625	0.1745	0.0742	0.4716	0.8453	0.9258	0.9458	0.2375	0.5284	0.0542	0.22	0.2	TRUE	8.24753
xnc030_370_982	NCU04939.2	1.02221	1	1.08308	4.18131	0.62365	0.41395	0.57802	1.54878	1.52731	0.80558	0.92034	0.89802	0.36253	0.36253	0.36253	0.36253	0.17412	0.17412	0.17412	0.17412	0.57464	0.57464	0.57464	0.57464	0.503	0.4537	0.0204	0.497	0.4283	0.0043	0.5463	0.5717	0.0032	0.9796	0.9957	0.9968	0.49	0.23	TRUE	-1.02355
xnc030_420_564	NCU04943.2	1.10512	1	1.07733	1.00398	0.30475	0.28189	0.31499	0.29835	0.35419	0.33183	0.37488	0.35771	0.24348	0.24348	0.24348	0.24348	0.10466	0.10466	0.10466	0.10466	0.2926	0.2926	0.2926	0.2926	0.6896	0.5423	0.6563	0.3104	0.3807	0.4925	0.4577	0.6193	0.6152	0.3437	0.5075	0.3848	0.42	0.39	TRUE	1.02289
xnc030_540_474	NCU04955.2	1.45944	1	1.09663	1.01823	0.74551	0.53835	0.68177	0.72881	0.82365	0.81868	0.96337	1.33511	0.44522	0.44522	0.44522	0.44522	0.22034	0.22034	0.22034	0.22034	0.78733	0.78733	0.78733	0.78733	0.7753	0.78	0.7134	0.2247	0.4502	0.5123	0.22	0.5498	0.5398	0.2866	0.4877	0.4602	0.19	0.19	TRUE	-1.78175
xnc030_560_896	NCU04959.2	1.09004	1	1.14467	1.00792	0.13984	0.12856	0.14771	0.13196	0.15067	0.1426	0.14927	0.13631	0.09608	0.09608	0.09608	0.09608	0.04322	0.04322	0.04322	0.04322	0.14032	0.14032	0.14032	0.14032	0.837	0.284	0.7925	0.163	0.1045	0.4646	0.716	0.8955	0.9106	0.2075	0.5354	0.0894	0.21	0.18	TRUE	8.52304
xnc030_600_1242	NCU04963.2	18.8066	1	19.4093	46.8264	5.73221	0.30628	5.23976	10.2573	8.34544	0.57395	6.22981	8.58781	0.2305	0.2305	0.2305	0.2305	0.09829	0.09829	0.09829	0.09829	0.29418	0.29418	0.29418	0.29418	1	0.4341	0.0041	0	0	0	0.5659	1	0.0009	0.9959	1	0.9991	0.23	0.37	TRUE	0.066947
xnc031_010_164	NCU04969.2	1.46008	1	1.24746	1.01616	0.25196	0.1885	0.21274	0.1877	0.25137	0.21234	0.23248	0.22551	0.13885	0.13885	0.13885	0.13885	0.06274	0.06274	0.06274	0.06274	0.19193	0.19193	0.19193	0.19193	0.9868	0.8911	0.9759	0.0132	0.075	0.4412	0.1089	0.925	0.9323	0.0241	0.5588	0.0677	0.27	0.25	TRUE	5.43346
xnc036_010_1965	NCU04986.2	1.53077	1	1.31886	1.29608	0.3829	0.24977	0.40688	0.49165	0.31658	0.2558	0.42507	0.61009	0.10099	0.10099	0.10099	0.10099	0.06613	0.06613	0.06613	0.06613	0.42912	0.42912	0.42912	0.42912	0.9819	0.8874	0.8175	0.0181	0.0776	0.0824	0.1126	0.9224	0.5408	0.1825	0.9176	0.4592	0.29	0.26	TRUE	7.44001
[truncated: 5,359 more rows]

## Sheet: 75MM-expression
Page 2: Genes (75 total) with significantly increased relative expression levels in the Δcre-1 mutant versus wild type when grown on minimal media
Common Name	WT_MM	Δcre-1_MM	WT_Avi4	Δcre-1_Avi	Δcre-1_MM/WT_MM	Annotation
[truncated: 75 more rows]

## Sheet: 102Avi_expression
Page 3: Genes (102 total) with significantly increased relative expression levels in the Δcre-1 mutant versus wild type when grown on Avicel media
[truncated: 103 more rows]

[truncated: 3 more sheets: 271_suppress_targets, 381_activate_targets, 64_activated_supressed_CRE-1]
