# Supplementary material for: Identification of the CRE-1 Cellulolytic Regulon in Neurospora crassa
Source: PLoS One. 2011 Sep 29;6(9):e25654. doi: 10.1371/journal.pone.0025654 (PMC3183063; doi:10.1371/journal.pone.0025654)
Supplement: Table S6 — (XLS) [file pone.0025654.s010.xls]

## Sheet: Sheet1
Table S6. Secreted proteins and enzyme activity of Neurospora crassa deletion strains
	Secreted Protein	Azo-CMCase	Glucose	Cellobiose
Gene Name	(% WT)	(% of WT)	(% of WT)	(% of WT)
WT	100 ± 15	100 ± 9	100 ± 14	100 ± 34
NCU02855	96 ± 2	116 ± 7	152 ± 28	96 ± 30
NCU03328	95 ± 13	117 ± 11	131 ± 18	40± 5
NCU05598	122 ± 9	137 ± 16	178 ± 19	235 ± 21
NCU06031	107 ± 12	131 ± 14	122 ± 14	109 ± 19
NCU06509	95 ± 6	83 ± 2	56 ± 16	38 ± 6
NCU06650	264 ± 23	205 ± 1	208 ± 18	377 ± 50
NCU06704	73 ± 4	86 ± 3	43 ± 19	27 ± 4
NCU07487	144 ± 2	134 ± 1	130 ± 8	74 ± 6
NCU09976	131 ± 3	132 ± 6	126 ± 4	78 ± 3
NCU09495	157± 20	118 ± 5	108 ± 11	83 ± 10
NCU00023	85 ± 7	117 ± 7	N/Da	N/D
NCU00315	75 ± 5	108 ± 6	N/D	N/D
NCU01053	77 ± 5	109 ±7	N/D	N/D
NCU01055	76 ±5	98 ± 18	N/D	N/D
NCU01076	77 ±14	97 ±11	N/D	N/D
NCU03702	87± 5	107 ± 9	N/D	N/D
NCU05548	81 ± 9	104 ±9	N/D	N/D
NCU08364	105 ± 13	111 ± 3	N/D	N/D
NCU09807	112 ±12	110 ± 10	N/D	N/D
NCU00710	107.779	99.5227	N/D	N/D
NCU00836	94.2061	96.4707	N/D	N/D
NCU02189	98.8782	113.957	N/D	N/D
NCU02240	102.174	103.818	N/D	N/D
NCU02344	138.401	119.577	N/D	N/D
NCU02455	120.066	118.508	N/D	N/D
NCU03181	98.177	87.971	N/D	N/D
NCU04494	77.598	119.423	N/D	N/D
NCU05969	118.419	110.296	N/D	N/D
NCU06607	114.633	108.408	N/D	N/D
NCU08746	98.695	111.071	N/D	N/D
a Not determined
